# Supplementary material for: Association between the blood urea nitrogen to albumin ratio and all-cause mortality in critically ill patients with liver cirrhosis
Source: Research Square preprint supplement (doi:10.21203/rs.3.rs-8787113/v1), 2026-02-10
Supplement: Supplementary file 1 [file 384c7718dc175e303d849c49.xlsx]

## Sheet: Data
					Data:Blood urea nitrogen to albumin ratio as a predictor of mortality in intensive care patients with liver cirrhosis
Age	Gender	BMI	HR	MAP	RR	SPO2	Temperature	Ureanitrogen	Albumin	BAR	WBC	Platelet	Hemoglobin	RDW	Sodium	Potassium	Lactate	PT	Fibrinogen	APTT	INR	totalBilirubin	ALT	AST	Creatinine	LDH	esophagealvaricealbleeding	AKI	AKIstage	Sepsis	Hypertension	Diabetes	Heartfailure	Hepatitis	Pneumonia	Hyperlipemia	COPD	Seroperitoneum	Hepatic encephalopathy	SOFA	APSIII	OASIS	GCS	Charlson	plasma	singledonorplatelets	Humanalbumin	Diuretic	Norepinephrine
65	2	46.2378	53	74	20	963	36.44	46	2.3	20	1.8	77	6.6	12.8	141	3.2	2	12.6	249	150	1.2	0.4	6	20	2.7	148	1	1	2	1	0	0	1	1	1	0	0	1	0	10	82	31	15	10	0	0	0	1	1
53	2	24.7443	104	97	14	100	36.72	34	2.9	11.7241	8	39	8.4	15.4	140	4.1	5.4	18.6	122	38.3	1.7	3.2	194	425	1.4	154	0	1	3	0	0	0	0	1	1	0	0	1	0	17	63	42	10	4	1	1	1	0	0
71	2	23.4906	84	107	18	100	36.33	93	2.7	34.4444	30.4	146	8.4	21	144	6.4	4.2	20.7	158	34.1	1.9	11.6	790	2905	3.4	1263	0	1	3	1	0	1	0	0	1	0	0	1	0	22	134	50	3	11	1	1	1	0	0
41	2	48.1315	96	70	18	98	36.89	30	3.6	8.33333	12.8	120	9.6	13.2	119	4.8	1.4	19.2	204.822	76	1.8	2.3	35	74	1.9	1106	0	1	3	1	0	0	1	1	1	0	0	1	0	6	57	18	15	7	0	0	0	0	0
57	2	33.057	110	150	22	98	37.28	69	2.1	32.8571	19.3	96	7.6	18.2	137	4.6	3.1	17.3	179	32.3	1.6	8.4	23	76	2	785	1	1	3	1	0	0	1	0	1	0	0	1	0	12	94	37	9	7	1	1	1	1	1
70	2	40.3793	43	71	12	95	35.83	51	4.2	12.1429	3.9	30	8.3	16.1	131	3.7	2	21.8	153	40	2	1.3	18	24	6.9	193	0	1	3	1	0	1	1	1	1	1	0	0	0	10	56	23	14	12	0	0	1	0	0
59	1	34.0902	92	50	20	100	36.67	26	2.6	10	12.8	79	8.3	19.5	138	4.5	2.6	17.5	177	34.5	1.6	4.1	593	817	2.9	443	0	1	3	1	0	1	0	0	1	0	0	1	0	14	130	56	3	9	0	0	0	0	0
30	2	20.0184	100	65	20	98	37.17	48	3.3	14.5455	7.7	94	7.3	15.8	136	4.5	2.4	18.2	242	30.6	1.7	2.7	15	42	3.3	153	0	1	3	1	0	0	0	0	0	0	0	1	0	12	98	35	15	5	1	1	0	0	0
36	2	31.5571	129	98	22	98	36.67	83	2.5	33.2	27.5	50	6.9	16.8	131	4.9	1.7	34.1	110	52	3.2	16.6	59	78	1.8	323	1	1	3	1	0	0	0	1	0	0	0	1	0	9	83	24	15	3	1	1	0	1	1
36	1	31.1111	87	54	15	96	37.33	59	5.1	11.5686	2	49	10.1	19.4	136	3.7	1.8	26.8	82	50.1	2.7	9	14	35	5.4	164	0	1	3	1	0	0	0	0	0	0	0	1	0	12	76	28	14	5	0	0	0	0	0
44	1	17.8703	129	113	19	98	36.67	40	1.7	23.5294	4.5	143	11.1	20	130	3.4	5.4	17.6	266	84.3	1.6	0.8	571	2784	4.7	4722	0	1	3	1	0	0	0	1	0	0	0	1	0	11	98	50	15	6	0	0	0	0	0
62	2	25.8065	89	72	20	100	36.72	26	2.9	8.96552	4.9	66	7.6	23	132	5	4.9	20.2	162	35.5	1.9	20.2	45	129	5.4	533	1	1	3	1	0	1	1	1	0	0	0	1	0	12	77	33	14	10	1	1	0	1	1
72	2	31.7413	86	73	20	93	36.44	143	3.8	37.6316	19.4	118	6.4	16.6	132	5.6	1.3	13.5	195	27.1	1.2	0.9	31	27	2.4	284	1	1	1	0	0	1	0	0	1	0	0	1	0	5	54	21	15	10	0	0	1	1	1
67	1	27.8044	119	73	15	99	36.44	14	3.2	4.375	32	425	7.8	24.2	150	4	3.4	19.5	255	42.1	1.8	21.8	22	107	0.6	318	1	1	3	1	0	0	0	1	1	0	0	1	0	16	107	52	3	11	0	0	0	1	1
51	1	32.1094	89	60	24	100	37.17	9	3.2	2.8125	235.6	30	4	17.7	133	4.3	1	33.8	529	30.2	3.1	0.3	15	26	0.6	844	1	0	0	1	0	0	0	0	1	0	0	0	0	5	39	30	14	7	1	1	0	1	1
51	1	36.8481	109	68	18	98	37.33	21	2.9	7.24138	6.4	100	10.4	18.4	138	5.4	5.4	18.6	129	39.8	1.7	9.4	1059	1419	1.1	1451	0	1	3	1	0	0	0	1	1	0	0	0	0	14	70	31	15	7	1	1	1	0	0
65	2	48.1859	63	90	6	100	37.39	15	3.2	4.6875	14.6	90	11.2	18.4	139	4.3	4.4	17.8	141	32	1.7	7.1	406	856	0.8	769	0	1	3	1	1	1	0	0	0	0	0	0	0	10	56	36	15	8	1	1	0	1	0
43	2	27.5652	84	86	38	92	36.94	48	3.1	15.4839	34.3	156	9.2	16.2	142	3.6	2.4	21.3	118	58.5	2	21.2	26	73	3.2	277	1	1	1	1	0	0	0	1	1	0	0	1	0	6	55	18	15	5	0	0	0	1	1
68	1	25.2174	154	98	22	91	37.22	29	4.2	6.90476	13.1	73	11	18.5	132	4.5	1.2	12.4	360	28.7	1.1	1.3	30	52	0.7	299	1	1	1	1	0	0	1	1	0	0	0	1	0	9	75	37	11	7	0	0	1	1	1
60	2	33.6239	71	77	18	100	36.78	61	4.3	14.186	6.8	35	7.9	17.8	140	3.6	1.9	15.4	99	30.4	1.4	5.9	34	53	2.4	156	1	1	3	1	0	1	0	1	0	0	0	0	0	9	64	28	15	8	0	0	0	1	1
47	1	49.178	93	77	24	100	36.89	11	2.7	4.07407	9.2	150	6.7	13.1	110	4.7	2.6	18.4	174	33.9	1.7	4.7	109	285	0.9	1258	1	1	2	1	0	0	0	1	1	0	0	1	0	4	27	21	15	4	0	0	1	1	1
50	1	20.8117	119	76	27	96	38.17	3	3.6	0.833333	10.3	191	8.3	17.8	142	3.3	2	17.6	122	39.5	1.6	3.1	13	22	0.5	97	0	0	0	1	0	0	0	0	0	0	0	1	1	4	54	32	14	4	0	0	0	1	0
66	1	23.9361	97	81	25	100	36.72	13	1.8	7.22222	22.2	219	11.6	13.4	142	3	2	20	204.822	40	2	1	53	34	0.6	490	0	1	1	1	1	1	0	1	0	1	0	1	0	1	21	31	15	7	0	0	1	0	0
59	2	35.2941	106	86	24	97	37.06	13	1.8	7.22222	11.8	279	6.4	16.1	128	4.5	0.5	14.1	355	28.9	1.3	0.8	15	24	1	168	0	1	1	1	0	1	0	0	1	0	0	0	0	2	21	32	15	3	1	0	1	0	0
60	2	20.715	106	65	18	100	37.11	92	2.7	34.0741	10.6	333	15.7	15.1	136	4.9	7.3	20.8	530	35.5	1.9	3	19	44	5.4	285	0	1	3	1	0	1	1	0	1	0	0	1	0	10	63	38	15	9	0	0	0	1	0
29	2	27.2531	102	96	19	96	37.11	7	2.5	2.8	9.4	46	6.7	19.3	120	3.5	2	40	50	51.9	3.7	13.7	38	98	0.6	386	1	1	2	1	0	0	0	1	1	0	0	1	0	15	72	38	7	5	1	1	0	1	1
61	2	29.8836	73	53	13	98	36.56	90	4.1	21.9512	12.2	54	6.4	16.3	126	5.8	4	27.6	108	68.8	2.6	8.8	19	19	2.6	108	0	1	3	1	0	0	0	0	0	0	0	1	0	9	83	35	14	5	1	0	0	0	0
55	1	40.7455	97	66	23	100	36.61	102	3.3	30.9091	21.2	201	7.6	17.4	136	6.1	2.4	24.8	84	35	2.3	4.2	44	67	2.7	200	0	1	3	1	0	0	1	0	1	0	0	1	0	17	111	42	3	8	1	1	0	1	0
66	2	35.8206	94	63	20	100	36.44	31	2.4	12.9167	8.7	34	4.4	23.4	136	4.7	10.3	58.2	79	56.5	5.3	12.7	28	51	1.8	269	0	1	2	1	0	0	0	1	0	0	0	1	0	11	55	25	14	7	0	0	0	0	0
52	1	40.3069	72	67	14	92	36.5	36	2.9	12.4138	8.6	25	4.7	19.1	144	4.9	2.7	34.2	104	59	3.2	16.2	17	41	0.9	256	0	1	3	1	1	0	0	1	0	0	0	1	0	15	66	40	14	6	1	1	0	0	0
79	2	38.5488	76	92	20	99	37.11	52	2.8	18.5714	6.2	215	4.9	16.2	141	4.8	1.4	12.1	204.822	26.8	1.1	1	15	26	2.1	284	0	1	3	1	0	1	1	0	1	1	1	1	0	9	51	41	15	17	0	0	0	1	0
58	1	32.7316	137	85	20	98	37.11	41	2.6	15.7692	17.6	49	8.7	24.1	130	3.3	4	16.9	99	31.6	1.6	4.1	18	30	3.4	315	0	1	3	1	0	1	0	1	1	0	0	1	0	13	76	38	15	10	0	1	0	0	0
64	2	26.5143	67	85	12	100	36.83	91	3.6	25.2778	5.7	31	8.3	21.5	141	3.8	6	31.6	58	56.4	2.9	13.4	232	480	5.1	1053	1	1	3	1	0	1	0	1	0	0	0	1	0	13	94	32	13	10	1	1	0	1	1
33	1	24.0578	104	73	18	96	36.89	13	2.1	6.19048	15.9	406	7.1	15.9	132	3	1	38.8	158	48.9	3.6	25.4	31	136	1.2	172	0	1	2	1	0	0	0	1	1	0	0	1	0	8	62	37	15	3	0	0	0	1	0
53	1	35.9623	89	80	26	98	37.11	10	2.9	3.44828	9.4	65	8.7	17.5	141	3.7	3.4	18.5	204.822	32.6	1.7	5.7	32	30	0.6	214	0	1	1	0	1	0	0	0	1	0	0	1	0	9	61	38	9	7	0	0	1	0	0
43	2	19.7551	121	94	26	96	36.56	46	3.6	12.7778	35.5	103	9.1	14.8	135	3.9	1.3	28.1	182	50.8	2.6	15.6	37	87	1.7	165	0	1	3	1	1	0	0	1	1	0	0	1	0	12	114	45	10	6	0	0	0	1	0
38	2	30.6369	97	73	18	97	37.33	35	3.2	10.9375	30.4	32	8	14.6	126	4.3	2.2	47.4	143	78.2	4.4	24.9	129	246	4.3	341	0	1	3	1	0	0	0	0	0	0	0	1	0	15	70	40	15	5	1	1	0	0	0
65	2	21.5844	131	112	22	100	36.61	24	2	12	9.6	59	9.7	15.9	139	4	7.2	22.5	119	31.1	2.1	5	45	83	1.2	254	1	1	2	1	1	0	0	1	0	0	0	1	0	14	99	49	14	5	1	1	1	1	1
58	2	30.8248	120	75	34	91	38.28	20	2.2	9.09091	1.7	87	7.8	23.7	129	4.1	7	34.8	139	39.2	3.2	25.7	30	40	0.9	339	0	1	2	1	0	0	0	0	0	0	0	1	0	10	64	30	15	5	0	0	0	0	0
35	2	24.093	104	65	21	100	36.5	71	2.7	26.2963	15.5	128	9.1	17.6	144	4.9	7.1	22.9	135	76	2.1	30.5	257	561	2.3	426	1	1	3	1	0	1	0	1	0	0	0	1	0	16	98	37	15	4	1	1	0	1	1
65	2	25.2377	61	67	15	97	36.5	91	3.6	25.2778	10	93	9.2	20.8	136	3.3	4	21.5	105	40.4	2	2.7	13	30	3.2	170	1	1	2	1	0	0	0	0	0	0	0	1	0	11	52	22	14	6	1	0	1	1	1
60	1	30.8603	76	83	17	100	36.17	36	1.8	20	12.9	90	9.2	18.4	135	4.1	2.3	23.2	164	59.1	2.1	6.5	76	458	1.5	305	0	1	3	1	0	1	0	1	1	0	0	1	0	13	82	51	15	6	1	1	1	0	0
56	2	28.7876	111	71	14	99	36.78	108	3.6	30	19.2	154	12.4	13.6	125	7.5	1.8	15.4	212	35.9	1.4	3.7	33	74	4.9	183	1	1	3	1	1	1	0	0	1	0	0	1	0	8	76	35	15	6	0	0	1	1	1
41	2	24.8016	109	100	21	96	38.61	61	3.3	18.4848	18.9	70	6.4	16.3	155	3.9	1.7	36.6	134	31.7	3.3	26.1	586	2600	2.4	2013	1	1	1	1	0	0	0	1	1	0	0	1	0	14	114	35	3	7	0	0	0	1	1
49	2	27.1731	103	76	15	100	37.11	14	2.4	5.83333	26.4	148	8	16.7	136	5.2	3.2	21.7	90	39.2	2	7.6	539	607	1	264	1	1	3	1	1	0	0	0	0	0	0	1	0	11	60	31	15	1	1	1	0	1	1
52	1	38.3383	76	53	20	96	36.89	12	3.5	3.42857	9.6	121	7.2	19	139	3.9	3.3	24.4	147	49.2	2.3	20.8	16	43	4.8	187	0	1	3	1	0	0	0	0	0	0	0	1	0	13	65	32	15	7	1	0	1	0	0
56	2	30.4876	76	49	18	95	37.17	47	2.8	16.7857	22.1	69	7.8	17.6	135	3.6	4	29.6	98	58.4	2.7	9.4	7	24	4.8	182	1	1	3	1	0	0	0	0	0	0	0	1	0	13	76	24	15	5	1	0	1	1	1
39	1	23.845	122	70	27	95	36.78	8	3.1	2.58065	10.8	238	5.8	26.5	137	2.5	10.3	17.4	252	29.2	1.6	15.9	26	101	0.8	359	0	1	2	1	0	0	0	1	1	0	0	1	0	6	49	29	14	3	0	0	1	0	0
64	1	26.7857	84	52	17	96	36.28	102	3.7	27.5676	4.4	43	7.6	20.5	110	4.1	2.1	36.1	204.822	59.9	3.5	9.8	30	84	2.4	281	1	1	3	1	0	1	0	0	0	0	0	1	0	15	102	35	11	8	0	0	1	1	1
78	2	23.3844	86	94	16	93	36.83	26	2.6	10	4.1	139	11	19.3	130	5.3	1.1	23.3	188	150	2.1	2	34	75	1	475	0	1	1	0	0	0	1	0	0	0	0	1	0	4	31	28	15	13	0	0	0	0	0
65	2	41.9501	62	66	13	100	36.61	25	2.8	8.92857	3.9	35	8.3	16.6	136	4	1.4	14.8	156	28.5	1.4	1.8	12	21	1.2	153	1	1	3	1	0	0	1	0	0	1	1	1	0	7	39	25	14	9	0	0	1	1	1
48	2	22.1088	79	95	15	96	36.39	112	5.4	20.7407	6	20	7.2	17.1	133	3.7	3.1	24.7	155	50.9	2.4	36.5	48	75	2.4	214	1	1	3	1	0	1	0	0	1	0	0	1	0	11	87	24	11	7	1	1	0	1	1
47	2	34.6828	84	86	15	100	36.94	14	2.5	5.6	2.6	18	7.4	18.2	139	4.2	3.1	25.6	103	62	2.4	4.6	257	487	0.6	230	1	1	3	1	0	0	0	1	0	0	0	1	0	10	52	30	9	3	1	0	1	1	1
45	1	30.4705	63	75	15	100	34.22	31	4	7.75	18.3	110	8.2	16.5	136	4.6	2.6	18	130	35.7	1.6	2.1	34	50	1.6	284	0	1	2	1	0	1	0	0	0	0	0	1	0	6	64	35	11	6	1	1	0	1	0
60	2	27.7045	105	69	14	100	37.17	19	2	9.5	9.9	80	9.1	14.3	138	4	4.5	19.7	190	35.8	1.8	4.9	726	2422	1	20330	1	1	3	1	0	1	0	0	0	0	0	1	0	13	66	36	15	6	0	0	0	1	1
51	2	36.4879	111	78	19	97	36.28	39	2.3	16.9565	4.2	135	8.3	20.9	118	4.2	1.8	15.9	455	32.4	1.4	2.3	25	69	2	216	0	1	3	1	0	0	0	0	1	0	0	0	0	6	60	21	15	4	0	0	0	1	0
55	2	25.9787	76	88	16	99	37	14	2.8	5	13.2	88	8.4	15.6	122	4.9	10	20.9	131	37.6	1.9	11.9	54	177	2.1	357	1	1	3	1	0	0	0	1	1	1	0	1	0	16	72	44	15	6	0	0	1	1	1
61	2	24.7751	74	73	16	100	35.67	83	4.3	19.3023	13.1	59	8.8	18	149	3.6	1.5	38.3	85	51.8	3.5	33.5	75	272	4.5	262	1	1	3	1	0	0	0	1	1	0	0	1	0	9	70	28	11	5	1	1	1	1	1
71	2	30.2934	103	90	17	100	36.83	56	3	18.6667	14.7	113	6.8	19.5	138	4.1	1.8	18.3	204.822	26	1.7	1.7	30	65	1.7	135	1	1	1	1	1	1	0	0	0	1	0	1	0	14	72	50	6	9	0	0	0	1	1
79	2	33.1755	97	75	15	100	36.72	13	3.5	3.71429	19.6	444	8.7	15.3	138	4.8	3.9	15.7	221	26.8	1.4	3.4	300	488	1	469	0	1	3	1	0	0	0	0	1	1	0	1	0	7	62	45	15	7	0	0	1	0	0
51	1	22.5	136	86	31	98	36.78	15	3.6	4.16667	14.1	60	3.6	18.2	134	4.5	3.9	20	73	83.9	2	7.8	29	72	0.4	302	0	1	3	1	0	1	0	0	0	0	0	1	0	14	113	62	3	6	1	1	1	0	0
70	2	38.9031	98	98	25	96	36.33	31	1.8	17.2222	0.3	55	5.5	13.7	152	3.4	3.1	14.3	204.822	32.4	1.3	1.1	27	54	1.4	807	0	1	3	0	0	1	0	0	1	0	0	0	0	5	43	31	10	6	0	0	1	1	1
59	2	28.2182	64	60	13	96	37.22	40	1.8	22.2222	16.2	232	12.7	14.5	149	4.1	1.1	14.6	204.822	26.4	1.3	0.6	38	72	1.4	125	0	1	2	1	0	0	0	0	0	0	1	1	0	8	55	47	15	6	0	0	0	0	0
63	2	17.8008	92	58	14	100	36.5	31	2.5	12.4	12.6	199	10.6	16.4	133	4.5	1.6	15	300	29.1	1.4	3.2	17	48	0.6	174	0	1	3	0	0	0	0	0	0	0	0	1	0	8	55	43	14	6	0	0	1	1	0
35	2	39.3021	76	103	19	98	36.33	35	3	11.6667	4.1	13	10.3	21.1	143	3.9	1.2	17	125	26.6	1.6	9.5	151	95	0.7	830	1	1	2	1	0	0	0	0	1	1	0	1	0	12	53	37	14	3	0	0	0	1	1
36	1	37.9688	131	102	32	86	36.56	4	2	2	18.6	392	10.7	18	133	4.1	3.3	20.3	305	30.6	1.9	8	65	458	0.4	336	1	1	3	1	0	0	1	1	1	0	0	1	0	8	97	46	14	5	0	0	0	1	1
48	1	25.9708	75	83	20	96	36.11	23	3.4	6.76471	10.9	133	8.1	16.3	137	3.3	1.4	18.5	233	46.8	1.7	5.8	13	58	1.3	193	0	1	3	1	0	0	0	0	1	0	0	1	0	14	55	36	15	4	0	0	1	0	0
40	2	23.2072	87	72	27	100	36.22	66	2.5	26.4	8.1	86	5.8	14.5	124	5.8	4.1	37	60	46.4	3.4	2.1	114	206	2.2	431	0	1	2	0	0	0	0	1	0	0	0	1	0	8	54	24	14	4	0	0	0	0	0
40	1	46.2018	84	57	20	92	36.67	63	4.4	14.3182	8.6	46	6.9	20.3	137	4.5	1.6	31.8	82	51.9	2.9	5.5	26	63	2.8	203	0	1	2	1	0	0	0	0	1	0	0	1	0	10	57	27	15	3	1	0	0	0	0
58	2	44.6429	101	62	17	100	36.83	77	4	19.25	11.7	290	7.6	18	140	5.6	1.8	15	260	30.8	1.4	1.6	12	29	5.6	160	0	1	2	1	0	0	0	0	1	0	0	1	0	12	71	27	13	6	0	0	0	1	0
54	2	39.5152	102	93	25	98	37	56	3.4	16.4706	19.2	102	9.6	14.7	126	4.8	1.2	22.2	127	34.3	2	6.4	573	924	1.2	337	0	1	2	1	0	0	1	0	0	0	0	1	0	7	61	20	15	5	0	0	0	0	0
43	2	21.5595	74	93	20	100	36.61	9	3.4	2.64706	7.3	83	11.2	15.7	138	3.5	1	14.7	204.822	29	1.3	0.8	27	56	0.6	284	0	1	3	1	0	0	0	0	1	0	0	1	0	3	17	24	15	3	0	0	0	1	0
62	1	23.3844	100	58	28	92	36.72	31	2.6	11.9231	17.8	146	8.3	13.6	132	3.5	1.6	14.5	204.822	32.3	1.3	0.4	10	23	1	283	0	0	0	1	0	0	0	0	1	1	0	1	0	5	35	23	14	9	0	0	0	1	0
75	1	25.8586	99	58	22	99	36.5	6	2	3	17.1	196	7.7	21.6	133	3.9	2.3	18.4	227	32.8	1.7	3.7	76	161	0.6	580	0	1	3	1	1	0	0	1	1	0	0	1	0	8	58	35	14	4	0	0	0	0	0
70	2	26.7857	88	118	17	100	36.72	40	3.4	11.7647	3.5	51	9.8	20.1	157	3.4	1.9	19.4	361	36.3	1.8	0.7	10	24	3.7	226	1	1	2	1	0	0	0	0	1	0	0	1	0	10	79	37	9	8	0	0	1	1	1
60	2	32.2597	73	61	18	98	37	13	2.4	5.41667	15.7	162	13.9	12.8	136	5.6	2.2	18.5	191	35.6	1.7	1.2	1872	3470	1.2	574	0	1	3	1	1	0	0	1	0	1	1	1	0	11	49	30	15	6	0	0	0	0	0
52	1	30.6477	73	76	14	93	36.56	83	3.7	22.4324	4.4	155	7.8	16.5	126	6.1	1.2	14.8	204.822	41.9	1.4	2.3	20	48	3.9	231	0	1	3	1	0	0	1	0	0	0	0	1	0	9	63	34	13	9	0	0	0	0	0
77	2	35.3549	72	73	15	100	36.89	47	2.4	19.5833	17.1	143	10.2	18.6	133	3.9	5.1	13.5	204.822	27.1	1.2	0.4	12	91	6.7	321	0	1	1	1	0	1	1	0	0	0	0	0	0	12	46	20	15	11	0	0	0	1	0
31	2	30.2189	80	80	23	94	36.67	62	3	20.6667	18	72	6.4	23.3	126	4.1	2.3	29.8	202	57.9	2.7	16.9	69	139	2.9	252	1	1	3	1	0	0	0	1	1	0	0	1	0	14	86	31	11	3	0	0	0	1	1
46	1	13.6409	80	76	21	97	36.89	20	2.2	9.09091	35.6	239	9.8	13.2	127	2	2.2	13.5	204.822	31.2	1.2	0.5	57	61	0.5	523	0	1	1	0	0	0	0	0	0	0	0	1	0	1	41	23	15	1	0	0	0	0	0
64	1	21.1168	75	81	15	100	36.67	35	2.7	12.963	11.3	58	9	16.8	139	3.4	2.6	16	239	41.9	1.5	12.1	1421	2042	1.3	482.686	1	1	2	0	0	0	0	1	0	1	0	0	0	11	68	32	15	5	0	1	0	1	1
71	2	23.1363	78	65	15	98	37.44	42	4.5	9.33333	5	96	5.7	16	134	3.6	3.21904	17.7	194	32.8	1.6	5.3	15	40	4.2	250	0	1	3	1	0	0	0	1	0	0	0	1	0	10	49	21	13	6	1	1	1	0	0
57	2	31.6522	95	84	18	95	36.5	77	4.2	18.3333	11	48	6.8	19.4	126	3.8	1.5	25.9	72	57.3	2.3	38.9	63	131	1.6	346	1	1	3	1	0	0	0	1	1	0	0	1	0	9	63	20	14	4	1	1	0	1	1
47	1	30.2579	108	76	18	100	37.28	12	4	3	15.1	103	7.7	20.3	138	4.1	4.2	21.8	141	33.5	2	4.8	18	59	0.8	122	0	1	3	1	0	0	0	0	0	0	0	1	0	6	34	32	14	3	1	0	0	0	0
68	2	59.2994	109	86	17	100	36.83	52	3.5	14.8571	13.1	295	6.2	16.8	135	5.9	3	18.4	361	23.7	1.7	1.1	31	36	2.1	301	0	1	2	1	1	1	0	0	1	0	0	1	0	6	68	32	9	6	0	0	0	1	0
56	2	41.1765	72	58	28	92	36.5	37	4.4	8.40909	7.5	25	7.5	16.2	133	5.1	2.6	33.8	67	70	3.1	11.5	17	24	3.3	175	0	1	3	1	0	1	0	0	1	0	0	1	0	12	73	25	15	7	1	1	0	1	0
54	2	25.7187	63	104	14	100	36.78	29	2.8	10.3571	3	76	7.8	18.3	145	4.7	2	26.7	62	77.4	2.6	5	915	961	2.2	1811	1	1	3	1	0	0	0	0	0	0	0	1	0	9	54	33	15	4	0	1	0	1	1
30	2	60.6576	99	92	19	96	36.78	25	2.4	10.4167	16.4	138	7.6	16.4	120	3.2	3.4	37.5	130	60.6	3.4	18.8	59	161	1.3	239	0	1	2	1	0	0	0	1	0	0	0	1	0	6	49	21	15	3	0	0	0	1	0
43	2	23.03	146	178	16	94	37	38	2.4	15.8333	15	120	11.2	17.5	143	5	4.9	17.7	372	35.3	1.6	0.4	38	53	1.8	341	0	1	2	1	0	0	0	0	1	0	0	1	0	6	60	32	15	2	0	0	0	1	0
52	1	24.8016	102	79	19	98	37.39	19	2	9.5	19.8	241	9.4	15.8	143	3.4	2	15.7	670	34.1	1.4	0.6	84	104	1.6	334	0	1	1	1	0	0	0	1	1	0	0	1	1	2	30	31	15	5	0	0	1	0	0
62	2	29.7995	114	112	15	96	36.28	33	3	11	8.3	89	9.5	16	137	4.1	4	18.4	186	41.9	1.7	1.7	11	28	5.5	247	0	1	3	1	0	0	0	0	0	0	0	1	1	13	95	33	4	6	1	1	1	0	0
55	1	32.6697	95	59	11	100	36.56	26	2	13	9.7	60	7.4	17.7	142	4	2.8	20	52	40	2	5.1	17	29	1.4	406	0	1	3	1	0	0	0	0	0	0	0	0	1	10	75	43	15	5	1	1	0	1	0
24	2	19.859	97	91	18	100	36.94	39	3.3	11.8182	15.1	119	9.4	19.3	138	4.2	2.3	14.6	711	25.7	1.3	0.8	7	89	4.6	316	0	1	3	1	0	0	0	0	0	0	0	1	0	13	45	27	15	3	0	0	0	1	0
29	2	41.1278	87	90	18	100	36.17	69	2	34.5	14.6	114	9	15.9	139	5.3	5.8	22.4	209	39.4	2.1	8.7	721	1385	6.7	270	1	1	3	1	0	0	0	1	1	0	0	1	0	14	91	36	15	4	0	0	1	1	1
42	2	30.9519	118	89	20	99	37.28	27	2.9	9.31034	16.8	61	9.4	17.4	138	3.7	3.4	18.5	227	46.7	1.7	7	542	480	1.4	705	1	1	2	1	0	0	0	0	0	0	0	0	0	11	56	28	15	3	0	1	0	1	1
64	2	25.3685	100	92	27	90	37.5	19	3	6.33333	3.5	127	6.8	19.7	139	4	1.6	13	185	31.5	1.2	0.3	26	33	2.9	373	0	1	3	1	0	0	0	1	0	1	1	1	0	12	63	35	15	13	0	0	0	1	0
62	2	30.8248	57	78	15	100	35.94	30	3	10	5.5	110	8.9	18.2	138	3	3.6	26.1	111	95.4	2.5	10.4	12	41	1.7	575	0	1	2	1	0	0	0	0	0	0	0	1	1	8	72	37	10	5	0	0	0	1	0
69	2	42.2377	93	75	23	92	36.94	32	3.7	8.64865	12	289	11.1	15.3	134	4.7	1	16.6	257	31.3	1.5	0.4	50	82	1.2	593	0	1	3	1	0	1	1	1	1	0	0	0	0	7	38	35	14	9	0	0	0	1	0
67	1	11.8516	63	77	14	100	36.56	33	3.1	10.6452	6.5	241	9.6	21	138	3.5	3.21904	19.2	145	29.1	1.8	0.9	191	436	0.6	907	0	0	0	1	0	0	0	0	0	0	0	1	0	2	43	24	14	3	0	0	0	1	0
64	2	31.1083	91	68	22	96	37.28	31	3.7	8.37838	27.3	361	9.3	16	128	4.6	1.6	24	124	47.8	2.2	2.8	12	29	1.6	147	0	1	1	1	0	0	1	1	1	0	0	1	0	5	57	28	14	8	0	0	0	1	0
68	2	28.4005	128	97	22	100	37.28	32	2.5	12.8	9.2	33	11.1	14.5	141	4.4	7.1	20	171	33	1.8	7.4	397	866	1.2	482.686	1	1	2	1	0	1	0	0	0	0	0	1	0	11	58	38	15	6	0	0	0	1	1
45	2	41.2061	84	73	19	96	36.83	120	3.2	37.5	33.1	171	7.2	20.2	127	5.2	4	23.8	168	38	2.2	25.7	140	248	3	323	1	1	3	1	0	0	0	1	1	0	0	1	0	11	80	27	10	3	0	0	0	1	1
33	2	20.9024	115	100	18	97	37.22	14	2.3	6.08696	22	126	8.6	13.7	127	4.8	1.6	21.6	239	35.2	2	3	58	96	0.7	252	1	1	2	1	1	0	0	0	0	0	0	1	0	10	70	42	13	5	0	0	0	1	1
51	2	35.1474	93	82	12	98	36.61	25	2.9	8.62069	7.8	85	9.7	18.3	142	4	0.9	18.9	160	35.6	1.7	3.9	29	63	0.7	149	0	0	0	0	0	0	0	1	1	0	0	1	0	8	40	19	14	6	0	1	1	0	0
60	1	25.1027	75	85	15	100	36.44	27	2.5	10.8	6.1	127	11.7	17.7	138	5.3	2.2	11.4	204.822	33.9	1.1	0.7	33	41	1	225	0	1	2	1	0	0	0	0	1	0	0	1	0	5	48	34	14	7	0	0	1	0	0
65	1	30.0454	89	67	22	99	36.89	41	3.7	11.0811	7.5	28	7.2	21.4	139	4.1	1	29.9	116	61.2	2.8	36.9	17	66	4.5	276	0	1	3	1	0	0	0	0	1	0	0	1	0	11	64	20	15	7	1	1	0	0	0
62	1	29.9095	69	70	24	100	36.33	29	2.3	12.6087	1.4	60	5.1	14.4	141	4.5	10.4	11	173	58.8	1	3.5	661	1296	1.5	921	0	1	3	1	1	0	0	0	0	0	0	1	0	18	88	40	15	8	1	1	1	0	0
62	1	30.1856	107	65	18	100	37.5	9	2.9	3.10345	5.3	75	8.9	19.4	140	4.1	4.4	18.4	135	46.8	1.7	8.6	455	687	0.9	333	0	1	3	1	0	1	0	1	1	0	0	1	0	10	64	25	15	7	1	1	0	0	0
30	2	19.4771	83	63	22	100	37	10	2.7	3.7037	3.6	117	6.4	21.8	137	4.5	2.1	23	201	35.1	2.1	13.1	27	51	1	287	1	1	1	1	0	0	0	0	0	0	0	0	0	12	48	26	15	4	1	1	1	1	1
57	1	27.2817	117	74	20	98	36.83	24	2.5	9.6	8.9	56	7	15.6	140	4.1	3.7	16.5	151	35	1.5	4.8	758	1371	2	444	0	1	3	1	0	0	0	0	0	0	0	1	0	16	79	41	15	6	1	1	0	0	0
71	1	27.8421	80	70	15	99	37	32	1.5	21.3333	18	313	8.3	19.5	140	4.3	1.7	13	286	25.7	1.1	0.9	16	20	2.9	482.686	0	1	3	1	0	0	1	0	0	0	0	1	0	6	70	40	15	9	0	0	1	0	0
62	2	22.7204	90	107	16	90	35.78	14	2.3	6.08696	27.4	171	10.6	14.2	145	3.2	2.3	16.8	204.822	36.3	1.5	0.6	17	24	0.7	280	0	1	3	1	1	0	0	0	1	0	0	1	0	9	38	39	15	5	0	0	0	1	0
62	2	37.7976	110	88	22	94	36.44	25	2.7	9.25926	14.9	151	6.1	18.6	144	4	3	13.7	427	31.2	1.3	1.8	24	77	2.6	258	1	1	3	1	0	1	0	0	0	0	0	1	0	12	47	44	13	10	0	0	1	1	1
66	2	38.6196	102	135	29	92	36.39	24	3.5	6.85714	41.7	120	9.6	14	137	4	6.7	19.7	341	31	1.8	3.6	171	339	1	343	0	1	2	0	1	0	0	0	1	0	0	1	0	3	47	31	15	5	0	0	1	0	0
41	2	28.0816	107	84	16	100	37	123	2.3	53.4783	12.3	100	8.9	19.6	142	6	1	21.3	173	44.6	2	1.3	27	47	3.7	219	0	1	3	1	0	1	0	0	1	0	0	1	0	12	75	44	15	8	1	1	0	0	0
49	2	30.2402	76	71	17	100	36.5	57	4.8	11.875	2	32	6.2	16.7	119	5.4	2.3	25.6	149	85.2	2.3	6.5	44	109	1.8	114	1	1	2	1	1	0	0	1	0	0	0	1	0	9	71	21	15	3	0	0	0	1	1
50	2	23.1363	105	77	21	96	37.83	14	3.1	4.51613	9.3	60	10.2	13.6	136	4.1	1.2	17.6	171	30.6	1.6	12.6	17	62	0.5	237	0	1	3	1	1	1	0	1	1	1	0	1	0	10	67	22	8	8	1	1	0	0	0
47	2	29.3249	75	60	20	100	37.06	12	3.6	3.33333	6.6	80	7.4	19.9	137	4.3	1.8	22.2	107	47.9	2.1	15.8	23	43	0.7	322	0	1	2	1	0	0	1	1	1	0	0	0	0	10	63	41	7	4	1	1	0	1	0
47	2	23.5102	94	98	20	100	36.5	72	4.1	17.561	4.6	41	7.8	14.9	135	4.2	3.1	13.5	156	32.6	1.2	1.1	16	37	4.4	183	1	1	3	1	0	1	0	1	1	1	0	1	0	9	54	22	15	7	0	0	0	1	1
50	1	23.4198	128	101	23	100	36.22	30	1.8	16.6667	10	52	7.6	19.9	143	4	0.9	12.7	239	27	1.2	4.2	25	63	0.6	413	0	0	0	0	0	1	1	0	0	1	1	0	0	9	87	31	6	9	0	0	1	1	1
53	2	28.6925	98	76	17	98	35.89	37	2.2	16.8182	17.1	84	11.6	16.4	140	4.9	1.5	21.2	96	150	2	4.2	22	45	1.2	151	1	1	3	1	0	0	0	0	0	0	0	0	1	6	87	49	15	5	1	1	1	1	1
59	2	35.8206	76	74	14	93	36.22	39	3.3	11.8182	9.7	101	9.8	19.9	144	5.9	1.7	20.5	120	47.3	1.9	12.3	97	169	1.8	337	1	1	3	1	1	1	0	1	1	0	0	1	1	10	74	31	12	6	1	0	1	1	1
65	2	42.8359	84	87	11	95	36.5	42	3	14	11.9	217	10.7	18.6	118	4.4	0.7	29.9	579	43.7	2.7	4.6	69	148	2.1	612	0	1	2	1	0	0	1	0	0	0	0	0	0	7	54	24	14	8	0	0	0	1	0
59	2	28.038	107	102	35	98	36.61	10	2.8	3.57143	4.7	409	10	15.2	138	4.2	1.7	13.1	545	33.9	1.2	0.3	42	33	0.5	216	0	0	0	1	1	1	0	0	1	0	0	1	0	0	33	29	15	7	0	0	0	1	0
47	2	28.699	165	92	23	92	36.89	53	2	26.5	4	15	11.4	15.1	132	3.8	3.4	21.2	232	49.8	1.9	13.9	50	265	1.5	493	1	0	0	1	0	1	0	1	0	0	0	0	1	12	82	30	12	4	0	1	1	1	1
64	2	23.1334	62	69	18	100	37.06	51	2.7	18.8889	7.8	88	12.1	17.5	139	4.5	2	16.5	215	32	1.5	16.7	478	1031	2.1	302	1	1	3	1	0	1	0	0	1	0	0	1	0	13	83	37	15	10	0	1	0	1	1
56	1	28.2738	73	81	14	95	37.11	73	3.8	19.2105	20	336	8	25.5	125	4.5	3.7	17.2	374	50.1	1.6	2.3	13	14	2.8	204	0	1	2	1	0	1	1	0	1	0	0	1	0	6	61	26	14	8	0	0	1	0	0
58	1	28.2384	85	87	18	99	36.44	59	2	29.5	4.9	187	8.2	13.2	136	6.5	2.9	12.9	377	23.7	1.2	1.7	661	1368	13.2	412	0	1	3	1	1	0	0	0	0	0	0	1	0	16	109	41	15	4	0	1	1	0	0
66	2	24.0569	92	72	23	98	36.5	21	2	10.5	7.6	111	6.9	14.7	139	3.1	1.8	20	204.822	40	2	1.3	12	34	0.9	182	0	1	3	1	1	0	0	0	1	0	0	1	0	4	50	43	13	6	0	0	0	0	0
76	2	54.7052	65	61	16	96	36.28	61	2.2	27.7273	9.7	165	9.4	18.3	134	4.8	3.21904	13	204.822	23	1.2	2.8	172	284	1.5	247	0	1	2	0	0	1	1	0	0	0	0	1	0	5	59	26	14	12	0	0	1	0	0
64	2	21.551	116	88	34	93	36.72	18	2.4	7.5	4.3	146	15.3	18.3	129	5.5	4.7	17.4	668	28.2	1.6	1.1	7	17	0.9	207	0	1	2	1	1	1	0	0	1	1	1	1	0	4	72	50	15	7	0	0	0	0	0
54	1	29.397	101	78	26	93	36.89	32	3.1	10.3226	19	68	8.6	23.9	134	3.2	4.4	44.8	92	63.4	4.1	14.9	51	107	5.9	300	0	1	3	1	0	0	0	0	0	0	0	1	0	13	68	34	12	7	1	1	0	0	0
69	1	24.1322	89	69	35	100	36.06	25	2.4	10.4167	3	52	8.9	18.3	144	3.2	1.8	13.7	204.822	41.2	1.3	1.4	23	27	0.7	224	0	1	3	1	1	0	0	0	0	0	0	1	0	4	48	37	13	6	0	0	1	0	0
54	1	18.3594	100	58	14	100	36.89	32	1.7	18.8235	12.3	204	6.3	17.2	127	6	1.4	14.4	160	150	1.3	11.9	48	164	0.8	437	1	1	2	1	1	0	0	1	1	0	0	1	1	8	63	41	15	4	1	1	1	1	1
58	2	23.6397	119	88	39	100	36.89	27	5.5	4.90909	15.4	146	5.8	19.6	136	4.6	4.3	17.9	242	33.6	1.6	4.2	12	38	3.9	167	0	1	3	1	0	1	0	1	1	0	1	1	0	14	91	52	15	8	1	1	0	1	0
79	1	23.3844	92	104	25	100	37.94	18	2.3	7.82609	3.4	82	8	18.9	135	4.4	2.5	12.7	204.822	38.3	1.2	0.8	29	59	0.7	321	0	1	1	1	0	1	0	0	0	1	0	1	0	6	63	37	9	7	0	0	0	1	0
46	1	29.5729	112	104	20	99	36.44	35	2.3	15.2174	8.8	52	8.7	15.9	129	4.7	2.9	19.6	285	35.9	1.8	8.3	2361	4142	0.9	243	0	1	3	1	0	0	0	1	0	0	0	1	0	18	98	43	8	4	1	1	0	0	0
61	1	23.7387	107	78	23	100	37.89	15	2.7	5.55556	13.1	77	8.3	18.5	131	3.9	2.1	17	204.822	30	1.6	3.2	21	38	3.3	482.686	1	1	3	1	0	1	0	1	0	0	0	1	0	8	43	30	14	8	0	0	1	1	1
77	2	25.5102	88	77	18	100	36.61	29	1.7	17.0588	12.5	115	7.5	20.3	144	4.9	1.6	15.4	204.822	31.2	1.4	1	17	40	0.9	132	0	1	3	1	0	0	1	0	0	0	1	1	0	6	50	37	14	11	0	0	1	0	0
68	1	28.2951	90	54	16	95	34.83	50	3.9	12.8205	5.1	74	5.3	19.3	131	6.1	11.6	39.6	70	150	3.9	26.9	54	167	2.7	592	0	1	3	1	1	0	0	0	0	0	0	1	0	12	101	35	14	5	1	1	1	1	1
61	1	21.3396	82	57	18	100	36.94	87	2.9	30	6	22	6.3	20.4	145	4.7	1.5	37.8	106	66.4	3.5	3.7	945	1251	4.2	890	0	1	3	1	0	0	0	0	0	0	0	1	0	15	62	34	15	9	1	1	0	0	0
58	2	24.7662	89	104	13	100	36.61	109	2.2	49.5455	10.8	6	6.7	15.6	127	5.5	2.6	11.5	166	26.8	1.1	0.2	44	43	15.7	223	0	1	1	1	0	0	0	0	0	0	0	0	0	8	43	18	15	4	0	1	1	0	0
77	1	28.8866	90	69	9	90	36.39	67	3.5	19.1429	7.5	65	11.5	19.9	135	3.7	1.9	13.4	204.822	31.5	1.2	1.6	10	30	6.2	293	1	1	3	1	0	1	1	1	0	1	0	1	0	11	61	52	15	12	0	0	0	1	1
39	1	39.8065	62	38	23	100	36.83	91	5.4	16.8519	6.2	100	7.4	21	131	5.1	2.7	25	111	39.4	2.3	24.3	40	56	6	248	1	1	3	1	0	0	0	0	0	0	0	1	1	12	96	29	14	5	1	1	0	1	1
48	1	30.3765	104	76	19	100	36.39	16	2	8	6.2	61	9.5	14.6	138	3.5	3.6	21.6	302	37.7	2	4.3	35	107	0.8	445	0	1	3	1	1	0	0	0	0	0	0	1	0	9	64	41	15	6	0	0	0	0	0
69	2	29.7708	94	109	26	98	37.06	31	4.7	6.59574	20.9	90	10.8	18.9	142	5.2	17	40.5	329	31.9	3.7	7	5409	7460	2.1	10950	0	1	3	1	0	1	1	1	1	1	0	0	0	9	83	49	15	10	1	1	0	1	0
63	2	28.6501	70	74	22	98	36.67	46	3.3	13.9394	6	45	7	20.9	149	4.1	4.7	42.5	121	67	3.9	42.6	23	64	0.7	482.686	1	1	3	1	0	0	0	1	0	0	0	1	0	10	67	22	10	7	1	1	1	1	1
58	2	25.9688	126	115	27	100	38.11	56	3	18.6667	14.3	17	9.7	16.7	137	3.5	2.1	32.2	36	53.8	3.3	10.2	30	52	1.4	455	0	0	0	1	1	0	0	0	1	0	0	1	0	8	60	35	13	4	0	0	0	0	0
46	2	26.1388	121	78	39	92	36.61	140	2	70	23.9	17	9.9	15.4	125	5.7	1.5	25.9	279	40.2	2.4	16.1	42	113	5.7	275	0	1	3	1	0	0	0	0	1	0	0	0	0	20	146	56	13	1	1	1	1	0	0
60	1	36.1749	81	69	18	100	35.11	15	1.9	7.89474	4.3	64	8.7	18.5	113	4.2	1.9	20.7	66	58.2	1.9	3.8	38	45	0.7	235	0	1	2	1	0	1	0	1	0	1	0	1	1	3	37	32	15	8	0	0	0	0	0
61	2	47.0876	86	75	16	100	36.78	67	2.1	31.9048	7.9	62	8	19.3	128	5.2	1.5	30.2	104	41.3	2.7	8.7	6	80	1.5	321	1	1	2	1	0	0	1	1	0	0	0	1	0	7	70	26	15	6	0	0	0	1	1
43	1	34.3679	93	81	15	97	36.89	33	4	8.25	15.7	214	9.5	20.6	131	3.5	7.2	15.4	378	46.3	1.4	23.7	42	163	4.3	231	1	1	3	1	0	0	0	1	0	0	0	1	0	8	95	28	15	5	0	0	1	1	1
59	2	25.6874	91	69	18	100	37.94	54	3.2	16.875	15.7	158	9.3	24.2	143	4.4	9.9	18.1	162	39.2	1.6	36.2	798	1190	1.9	273	1	1	3	1	0	1	0	0	0	0	0	0	0	18	89	49	15	5	1	1	1	1	1
38	1	33.0579	113	86	16	94	36.89	9	3.5	2.57143	10.3	119	10.8	13.2	133	3.4	1.5	16	204.822	26.6	1.5	0.5	15	42	0.6	655	0	1	2	1	0	0	0	1	1	0	0	1	0	2	36	24	15	2	0	0	1	0	0
29	1	24.8016	131	61	27	91	37.94	10	3.5	2.85714	24	179	7.8	21.3	137	3	3.1	29	150	62.8	2.6	13.5	30	115	0.7	247	0	1	3	1	0	0	0	1	1	0	0	1	0	8	75	31	14	3	1	1	0	0	0
41	2	26.7641	80	48	19	97	37.28	122	2.9	42.069	12.3	143	9.1	20.1	141	4	3.4	23.7	310	34	2.2	22.4	87	290	9.5	367	0	0	0	1	1	0	0	1	0	0	0	1	0	14	69	27	15	4	0	0	0	0	0
51	2	33.771	53	81	24	98	37.28	55	3.9	14.1026	5.2	42	8.5	19.3	134	3.4	1.3	23.1	163	42.3	2.2	51.4	25	58	3	235	0	1	3	1	0	1	0	0	0	0	0	0	1	11	60	18	15	5	1	0	0	0	0
53	2	24.8922	63	61	23	100	36.39	73	3.7	19.7297	13.9	125	8.4	16.5	128	4.2	1.4	33.2	89	92	3	50.7	74	126	3.3	328	0	1	3	1	0	0	0	1	1	0	0	1	0	10	75	33	14	4	1	1	0	0	0
70	2	19.735	104	83	21	99	36.5	26	2.4	10.8333	9.3	77	9.9	24	141	1.9	1.8	12.6	187	33.1	1.2	4.6	21	48	1.2	274	0	1	3	1	0	0	0	1	1	0	0	1	1	8	59	31	15	6	0	0	0	1	0
61	1	31.1791	124	63	21	96	37	42	2.8	15	16.1	256	10.5	16.1	132	4.3	1.8	42.2	418	51	3.9	2.4	6	19	4.3	154	0	1	3	1	0	0	0	0	0	1	0	1	0	9	79	42	15	8	1	0	1	0	0
43	2	28.5467	112	103	20	100	38.33	41	3.2	12.8125	12	118	9.6	20	145	5	7.4	18	243	36.4	1.6	5.8	1468	1406	1.4	310	0	1	1	1	0	0	0	1	0	0	0	1	1	11	61	30	10	3	0	1	1	0	0
52	2	31.0857	102	63	16	100	35.56	45	3.6	12.5	5.7	89	10.2	17	135	4	2.9	35.3	73	69.3	3.4	7.5	20	30	1.8	197	1	1	2	1	0	0	0	0	0	0	0	1	0	11	75	35	15	6	1	1	1	1	1
63	2	45.8957	61	67	21	100	36.61	82	4.5	18.2222	5.7	115	7.3	18.3	141	4.8	2.1	21.2	204.822	36.1	2	1.5	12	36	4.3	180	1	1	3	1	0	1	0	0	1	1	0	1	1	7	63	41	14	10	1	0	1	1	1
71	1	26.8389	109	87	22	98	37.11	30	2.4	12.5	6.7	211	12.8	15	126	3.3	2.2	20	204.822	40	2	1.6	15	26	1.6	482.686	0	1	1	0	0	0	1	0	0	1	0	0	0	2	39	25	15	9	0	0	1	0	0
41	2	23.4645	92	87	18	100	37	13	2.1	6.19048	28	69	8.3	21.3	140	5.1	1.8	22.7	163	150	2.1	12.2	208	263	1.6	195	0	1	3	1	0	0	0	1	1	0	0	1	0	10	72	33	15	3	1	1	1	0	0
67	1	29.443	62	65	17	95	36.83	24	2.6	9.23077	8.4	65	9.8	22.4	133	4.1	4.4	28	88	65.4	2.6	8	247	629	3.5	482.686	1	1	3	1	0	0	0	1	0	1	0	1	0	12	69	36	15	7	0	0	1	1	1
40	1	33.9556	93	82	21	100	37.89	20	2.6	7.69231	9.9	53	8	18.6	138	4.2	3.1	26.1	124	37.6	2.37	8	1399	2043	1.1	638	1	1	3	1	1	0	0	1	0	0	0	1	0	12	83	31	15	4	0	0	0	1	1
54	2	29.3848	121	67	21	96	36.28	62	2.4	25.8333	11.2	108	10.1	15.9	148	3.4	2.1	23.8	204.822	39.3	2.3	1.7	31	98	1.3	193	0	1	2	1	0	0	0	0	1	0	0	1	0	8	51	40	15	2	1	0	0	0	0
47	2	23.3004	86	65	21	97	36.89	126	3.1	40.6452	16.3	102	8.4	17.8	129	2.5	2	19.2	230	39.9	1.8	18.8	14	45	6.6	231	0	1	3	1	0	1	0	1	1	0	0	1	1	13	94	29	15	7	1	0	0	1	0
59	2	60.941	90	75	14	98	36.5	63	2.4	26.25	5.4	64	9.5	16	129	4.7	2.3	27.4	284	40.8	2.5	1.8	18	54	2.4	441	0	1	2	1	0	1	1	1	1	1	0	1	0	6	60	20	15	10	0	0	1	0	0
45	2	34.2023	121	92	21	99	36.67	40	4.2	9.52381	21.2	104	8.2	18.4	139	5.2	1.7	41	126	60	3.8	28.6	38	86	1.9	206	1	1	3	1	0	0	0	1	0	0	0	1	0	9	67	33	15	4	1	1	1	1	1
22	1	23.3787	92	70	19	100	36.83	23	3.6	6.38889	8.1	196	9.7	21.3	136	3.7	1.4	22.8	167	150	2.1	33.7	103	122	2.1	148	1	1	3	0	0	0	0	1	1	1	0	1	1	7	57	24	15	6	0	0	1	1	1
49	1	31.7815	56	76	19	100	36.44	76	4.3	17.6744	9.6	168	9	22.5	129	3.2	1.6	12.5	177	27.2	1.2	0.9	56	91	2.8	237	1	1	3	0	0	0	0	0	0	0	0	1	0	3	52	20	15	6	0	0	0	1	1
52	2	28.1321	83	76	17	96	37.11	18	3.1	5.80645	7.7	87	5.8	15.1	119	3.2	2	26.9	204.822	36.1	2.5	26.3	76	364	1.1	328	1	1	1	1	0	0	0	1	0	0	0	1	0	8	49	23	15	6	0	0	1	1	1
60	2	29.5619	84	50	26	98	37.06	22	1.5	14.6667	15.9	80	7.4	14.8	146	4.2	3.8	19.9	150	34.7	1.8	1	18	39	1.2	177	1	1	3	1	1	0	0	1	1	1	0	1	0	12	67	32	15	10	1	1	1	1	1
67	2	31.682	131	140	25	95	39.22	44	2.1	20.9524	35.9	39	13.6	15.1	138	3.6	11.4	22	523	45.7	2.1	3.9	16	33	3.6	290	0	1	3	1	0	1	1	0	0	0	0	1	1	20	159	64	3	7	0	1	0	0	0
53	2	22.4877	67	88	19	100	36.78	11	2.9	3.7931	4.2	105	8.5	16.3	137	3.8	1.1	19	157	38	1.8	3.7	20	56	0.6	245	1	1	2	1	0	0	0	1	1	0	0	1	0	6	23	32	15	5	1	1	1	1	1
57	2	27.4691	106	97	13	100	37.56	21	2.4	8.75	12.8	61	8.9	21.6	130	4.9	1.6	27.8	147	36.1	2.5	10.1	513	1041	0.8	856	0	1	3	1	0	0	0	0	0	0	0	1	0	8	56	36	14	4	0	0	0	0	0
42	1	36.5464	113	75	28	94	36.39	31	2.4	12.9167	32.7	42	12.4	14.7	132	9.3	4.4	21.3	213	26.5	2	1.1	70	113	0.9	461	0	1	1	1	0	1	1	0	0	0	0	0	0	10	64	25	8	5	1	1	0	0	0
45	1	33.6237	96	84	20	100	37.39	13	2.7	4.81481	5.1	56	9.6	23.1	139	3.7	4	17.7	170	31.7	1.6	13	1172	1647	0.6	2150	1	1	2	1	0	0	0	1	0	0	0	1	0	12	48	23	15	4	0	1	0	1	1
53	2	35.0496	127	89	18	95	36.72	26	3.2	8.125	13	108	9.8	14.5	135	4.1	2.4	16.8	591	33.7	1.5	5.2	33	54	1.4	267	1	1	3	1	1	1	0	1	0	0	0	1	0	6	64	50	15	7	0	0	0	1	1
58	1	24.9433	79	63	13	96	37.11	85	3.5	24.2857	5.1	35	6.5	16.7	125	3.6	1.5	17.4	33	34	1.6	5	22	50	2	205	0	1	3	1	0	0	0	1	1	0	0	1	0	8	65	24	15	4	0	0	1	0	0
57	2	36.8481	88	81	20	100	36.78	66	3.8	17.3684	7.8	70	7.2	21.2	128	3.7	2.2	31.1	132	51.7	2.8	16.1	14	37	0.6	183	0	1	2	1	0	0	0	0	1	0	0	1	0	7	52	19	15	4	1	0	0	1	0
32	1	23.2781	100	116	26	100	36.72	37	2	18.5	12.1	176	8.3	16.9	124	3.9	2	30.4	177	41.3	2.8	30.4	19	85	8.4	316	1	1	3	1	0	0	0	1	0	0	0	1	0	9	72	37	15	4	1	0	1	1	1
44	1	23.1096	80	48	28	95	35.17	60	3.2	18.75	5.9	64	4.7	23.9	131	5	9	29.5	110	45	2.9	15.7	35	119	3.2	462	0	1	3	1	0	0	0	0	1	0	0	0	1	20	116	49	10	4	1	1	0	0	0
66	1	24.4919	81	60	17	100	36.89	15	2.6	5.76923	3.3	132	9.4	17.7	134	3.3	1.6	22.6	117	39.7	2.1	8.7	44	104	0.8	482.686	0	1	1	1	0	0	0	0	0	0	0	0	0	8	71	26	6	5	0	0	1	0	0
71	2	18.7429	76	72	23	95	36.39	36	1.8	20	12.6	45	9	18.1	142	3.7	2.7	30.8	157	50.9	2.8	3.5	24	70	0.9	376	0	1	3	1	0	1	0	1	1	0	0	1	0	11	46	26	15	7	0	0	0	1	0
57	1	24.6458	87	66	19	94	36.94	25	3.8	6.57895	3.7	70	7.2	22.4	141	4.6	1.6	25.6	36	52.8	2.5	7.8	21	46	2	262	0	1	3	1	0	0	0	0	1	0	0	1	0	12	75	31	15	4	1	0	0	0	0
48	2	53.8903	62	60	20	100	37	37	3.1	11.9355	3.4	85	10.7	16.1	145	5.2	4.2	17.2	140	36.5	1.6	11.2	1098	4354	1.8	409	1	1	3	1	0	1	0	1	1	0	0	1	0	14	65	33	15	4	1	1	0	1	1
38	1	40.4974	80	65	12	93	36.94	14	3.3	4.24242	2.4	128	12.6	15.3	138	3.7	0.9	14.7	204.822	27.9	1.3	0.9	23	30	0.7	143	0	1	2	0	0	1	0	1	0	0	0	0	0	5	41	25	14	4	0	0	1	0	0
80	1	29.4076	110	70	16	94	36.06	46	3.3	13.9394	9	140	6.7	26.4	129	3.6	1.8	16.1	204.822	63.8	1.5	0.7	10	19	1.7	283	0	1	2	0	0	0	1	0	1	0	1	1	0	3	50	32	15	8	0	0	1	0	0
55	1	15.5896	91	66	21	100	37.11	8	2.6	3.07692	20.6	307	8.5	18.8	132	4.1	1.2	13.5	204.822	42.8	1.2	0.4	13	16	0.4	113	0	1	2	1	0	0	0	0	1	0	0	1	0	3	25	37	15	8	0	0	1	0	0
79	1	29.3555	55	54	13	98	36.39	14	3.1	4.51613	7.7	120	8.6	17	137	3.9	3.4	13.8	296	21.6	1.3	0.4	82	370	0.8	1055	0	1	3	1	0	0	0	0	0	1	0	0	0	6	45	48	15	9	0	1	0	1	0
66	2	26.1878	95	122	24	99	36.78	34	2.2	15.4545	9.5	96	9.2	16	140	4.3	0.7	16.6	204.822	33.6	1.5	0.9	39	29	0.8	163	0	1	2	1	1	0	0	0	1	0	0	0	0	9	48	35	12	3	0	0	1	0	0
80	2	25.565	103	66	13	100	36.89	32	3.4	9.41176	6.6	70	8	16.4	135	4.1	1.5	17.2	206	39.9	1.6	1.6	6	19	2.4	186	0	0	0	1	0	1	1	0	0	0	0	1	0	10	50	41	14	12	0	0	0	1	0
65	1	33.2782	61	58	11	99	37.11	58	2.4	24.1667	3.6	65	8	18	134	4.7	1.5	16.8	157	34.7	1.5	1	14	21	5.6	141	1	0	0	1	0	1	0	0	1	0	0	1	1	8	52	23	14	9	0	0	1	1	1
50	2	29.5619	94	58	17	98	37.22	13	1.7	7.64706	15.7	65	5.7	20.9	132	4.3	4.8	24.1	196	53.9	2.3	11.4	74	119	1.3	190	1	1	2	0	1	0	0	1	0	0	0	1	1	8	68	19	15	3	0	0	1	1	1
62	1	23.1718	60	81	8	96	36.33	40	2.2	18.1818	10.9	32	8.3	22.7	144	5.2	1.8	20.7	116	34.4	1.9	11.6	62	96	0.6	591	0	1	2	1	0	0	1	1	0	0	0	1	0	7	54	23	13	9	0	0	0	1	0
42	2	29.4724	74	87	11	98	37.11	35	3	11.6667	31.1	197	8.6	17.2	132	5.8	2.2	18.4	204	35.1	1.7	3.5	147	241	1	808	0	1	2	1	0	0	0	1	1	0	0	0	0	11	84	42	15	3	1	1	1	0	0
57	2	29.9745	100	52	20	99	37.56	2	1.1	1.81818	9.7	100	3.5	21.4	131	3.7	3.9	29.7	153	64.4	2.7	0.7	6	9	0.3	85	0	1	3	1	0	0	0	1	0	0	0	1	0	11	63	37	15	6	1	1	1	0	0
67	1	24.8016	119	70	17	97	36.94	40	3.1	12.9032	18.3	203	9.8	15.6	129	4.6	2.6	26.7	204.822	38.5	2.5	1.5	46	71	3.3	200	0	1	1	1	0	1	1	0	0	0	1	1	0	4	46	24	15	11	0	0	1	0	0
33	2	30.4255	110	71	30	97	36.83	78	3.6	21.6667	27.3	123	9.6	14.9	134	4.1	1.1	50	204.822	72.2	4.7	31.8	59	64	3.6	278	0	1	3	1	0	0	0	1	1	0	0	0	1	14	104	52	13	4	1	0	0	0	0
60	2	40.9226	107	102	20	92	36.67	20	3.8	5.26316	8.4	152	15.2	21.7	140	4.1	1.9	15.9	204.822	37.5	1.5	1.9	14	43	1.1	380	0	1	2	1	0	0	1	0	1	0	0	0	0	1	26	23	15	5	0	0	1	0	0
65	2	25.2976	63	71	11	95	36.33	67	3.9	17.1795	8.4	95	6.9	17	134	5.8	2.1	19.6	72	42.4	1.8	1.4	49	116	1.6	180	1	1	3	1	0	0	0	1	1	0	0	1	0	10	50	38	15	7	0	0	1	1	1
57	1	26.2897	103	56	15	97	36.33	77	3	25.6667	24.8	100	7.5	22	138	3.6	1	35	103	55.4	3.2	8	19	38	1.4	221	1	1	2	1	0	0	0	0	1	0	0	1	0	11	60	41	14	4	1	0	0	1	1
45	1	33.6823	97	70	16	100	37.11	27	2.2	12.2727	5.3	103	6.9	17.5	137	3.6	4.7	21.6	232	29.7	2	6.3	1738	2901	0.6	482.686	0	1	3	1	0	0	0	1	1	0	0	1	0	9	74	40	15	3	0	0	0	0	0
54	2	33.5517	82	93	23	93	36.5	84	4	21	19	132	11.9	17.3	132	5	2.4	34.1	99	56.3	3.1	62.8	70	84	5.4	360	1	1	3	1	0	0	0	1	0	0	0	1	0	11	78	36	13	5	1	1	0	1	1
63	2	35.2891	75	61	23	97	36.89	24	3.9	6.15385	5.8	55	7.6	16	134	5.4	3.5	28.4	60	57.8	2.6	3.6	11	23	1.6	160	1	1	1	1	0	0	0	0	0	0	0	1	0	9	63	30	15	8	0	0	1	1	1
63	1	35.0032	93	60	17	96	36.56	19	2.7	7.03704	18.1	27	5.4	17	132	4.7	11.4	20	49	40	2	10.9	22	26	1.5	321	1	1	2	1	0	1	1	0	1	0	1	1	0	8	73	26	15	9	1	1	1	1	1
55	1	21.6713	110	60	0	100	37.17	24	2.6	9.23077	7.3	43	9.5	14.7	144	3.2	10.2	21	164	44.6	1.9	4.1	240	2230	3.1	1883	0	1	3	1	0	0	0	0	1	0	0	1	0	17	94	51	15	6	1	1	0	0	0
41	2	25.7724	61	57	19	100	35.17	138	2.6	53.0769	18.1	395	11.7	21.8	129	5.5	1	26.1	180	66.8	2.5	39.5	29	19	5.6	73	1	1	3	1	0	0	0	0	0	0	0	1	1	13	85	33	14	3	1	1	0	1	1
46	2	33.7656	122	80	47	100	36.5	40	3.8	10.5263	6.3	57	8.9	17.4	131	4.9	4	21.2	170	38	2	10.1	23	38	1.8	175	1	1	3	1	0	0	0	1	1	0	0	1	0	15	78	41	14	3	1	1	1	1	1
60	2	34.481	78	90	19	98	36.94	51	2.5	20.4	7	102	8.6	14.1	125	4.6	1.6	19.8	344	36.4	1.8	0.6	53	16	8.3	196	1	1	3	1	0	1	0	0	0	1	0	1	0	8	47	32	13	12	0	0	1	1	1
58	2	25.565	89	38	18	88	36.5	37	2.4	15.4167	25	107	8.7	15.7	141	5.5	16	20.2	169	44.7	1.9	7.2	37	101	1.7	423	1	1	3	1	0	0	0	1	0	0	0	1	0	15	115	51	15	4	1	1	1	1	1
75	2	21.9722	84	78	9	99	36.89	38	2.6	14.6154	3.1	94	7.5	16.8	147	3.8	9.7	15.6	177	79	1.4	1.9	262	805	1.8	482.686	0	1	3	1	0	0	0	0	1	0	0	0	0	15	68	40	15	6	0	1	0	0	0
70	2	27.2463	104	74	17	98	37.06	46	2.8	16.4286	12.7	374	14.2	14.2	138	4.9	2.2	15.5	667	28.6	1.4	0.9	51	142	1.6	325	0	1	2	1	0	0	0	0	1	0	0	1	0	9	49	42	15	5	0	0	1	0	0
68	1	34.1481	71	72	14	100	36.56	33	3.1	10.6452	4.5	95	7.9	18.1	139	3.5	5.6	17.2	221	47.5	1.5	4.3	427	1933	1.2	270	0	1	3	1	0	1	0	0	1	0	0	1	0	11	50	27	15	8	0	1	0	0	0
67	1	25.7617	102	116	16	97	36.67	16	1.8	8.88889	7.2	139	7.8	21.2	145	3.5	1.1	14.7	204.822	38.6	1.3	0.5	9	18	0.4	288	0	1	2	1	1	0	0	0	1	1	0	1	0	1	26	37	15	6	0	0	0	1	0
57	1	37.8047	102	73	19	91	36.72	32	2.3	13.913	5.7	31	8.7	18.2	131	3.4	5.8	20.7	254	84	1.9	3.2	25	34	1.6	110	0	1	2	1	0	1	0	1	1	0	0	0	0	15	74	46	13	5	1	1	0	1	0
53	2	27.8201	88	80	15	94	36.67	71	4.5	15.7778	2.6	42	7	19.7	152	4.4	2.8	48.5	65	79.1	4.7	62	45	80	2.1	301	1	1	3	1	0	0	0	0	1	0	0	1	1	10	77	22	13	4	1	1	1	1	1
58	1	21.6482	112	83	14	98	36.72	20	3	6.66667	45.6	69	6.1	25.9	139	4	3	21.3	281	33.2	1.9	24.8	17	28	0.8	322	0	1	2	1	1	0	0	1	1	0	1	1	0	8	53	21	15	3	0	1	0	1	0
65	1	17.5026	137	56	15	81	36.83	29	2.1	13.8095	7.4	133	5.3	18.2	135	4.6	9.4	26.8	68	66	2.5	3.5	16	24	0.8	172	0	1	3	1	1	0	0	1	0	0	1	1	0	9	88	39	15	8	1	1	1	1	1
40	2	32.1143	123	132	23	90	37	26	2.8	9.28571	9.7	97	7.2	18.9	139	3.1	1.7	26.4	99	50.4	2.6	12.7	26	101	1.2	502	0	1	2	1	1	0	0	1	1	0	0	1	1	13	85	43	12	3	1	0	1	0	0
71	1	25.333	94	66	13	93	36.78	12	2.4	5	16.1	160	9.8	17.7	131	3.3	0.8	23.3	163	39.5	2.2	10.7	46	112	0.6	121	0	1	3	1	1	0	1	1	1	0	0	1	1	11	61	37	15	8	0	0	0	1	0
39	1	40.0016	103	65	25	97	37.06	13	2.5	5.2	9.7	128	7.1	22.7	129	5.1	1.1	31.2	220	41	2.8	18.9	106	234	0.5	167	1	1	3	1	0	1	0	1	0	0	0	1	0	9	53	27	15	4	0	0	0	1	1
61	1	29.4785	94	92	15	82	37.11	18	2.9	6.2069	7.3	67	11.2	17.6	142	4.5	2.1	16.2	174	26.5	1.5	1.5	39	27	0.8	453	1	1	3	1	0	0	0	0	0	0	0	1	0	6	36	40	14	6	0	0	1	1	1
56	1	21.0019	71	89	10	100	36.39	39	2.8	13.9286	13.7	126	7.7	15.7	136	5.9	2.9	21.7	102	34.3	2	0.4	104	624	6	687	0	1	3	1	0	0	1	1	0	1	0	0	0	12	59	40	15	5	1	0	1	0	0
61	2	52.0833	132	67	29	96	37.83	16	2.6	6.15385	3.7	32	7.8	17.9	134	3.7	3.5	36.7	150	150	3.4	4.6	16	39	1	218	0	1	3	0	0	1	0	0	0	0	0	1	0	7	76	34	14	4	0	0	1	0	0
62	2	35.9184	120	91	24	100	36.72	40	2.8	14.2857	10	76	11	16.5	141	5.9	7.4	19.4	139	32.3	1.8	4.5	42	107	0.7	239	1	1	3	1	1	1	0	1	1	0	0	1	0	11	72	35	15	6	0	0	0	1	1
69	2	29.2659	122	68	25	95	36.78	39	3.2	12.1875	18.9	146	12.7	20.3	141	3.9	8.7	47.5	579	56.8	4.2	5.8	132	208	2.1	277	0	1	3	1	0	0	1	0	0	1	0	0	0	12	100	46	13	7	1	0	0	1	0
70	2	37.911	109	65	15	92	36.72	55	2.5	22	0.1	5	6.3	16.9	149	3.3	1.8	19.5	232	36	1.8	6.6	52	40	1	228	0	1	2	1	1	0	0	0	0	1	0	0	0	9	67	27	15	5	0	0	1	0	0
51	2	24.9079	100	89	38	96	37.28	42	4.2	10	10.3	99	11.7	15.8	134	4	4.3	35.4	507	37.1	3.3	5.4	21	32	1.5	187	1	1	3	1	0	0	0	0	0	0	0	1	0	5	50	35	15	5	1	0	1	1	1
40	2	16.7474	129	86	21	100	37.33	27	3.3	8.18182	11	135	10.7	15.8	141	4.4	1.6	11.5	204.822	29.6	1	1.2	76	72	0.4	332	1	1	2	1	0	0	0	0	1	0	0	0	0	3	50	34	15	5	0	0	1	1	1
44	2	31.3743	89	76	25	94	38.33	67	3.1	21.6129	17.3	88	14.3	13.9	131	4.1	2.9	14.9	204.822	34.6	1.4	1.5	53	89	15	127	1	1	3	1	0	0	0	0	0	0	0	0	0	11	47	33	15	3	0	0	0	1	1
57	1	22.8529	61	80	20	100	36.39	14	2.7	5.18519	9	134	9.7	18.5	141	3.7	1.2	16.4	204.822	40.6	1.5	0.8	21	41	1.3	160	0	1	2	0	0	1	0	0	0	0	0	1	0	3	33	32	15	4	0	0	0	0	0
56	1	30.4266	94	62	28	100	36.72	37	3.5	10.5714	11.2	138	5.5	19	141	6.4	6.9	24.5	120	31	2.3	6.4	12	48	1.5	233	1	1	3	1	0	0	0	0	1	0	0	1	0	14	87	48	14	6	1	1	1	1	1
62	1	23.3135	79	54	21	97	35.89	65	3.7	17.5676	9.5	159	8.1	20.5	133	5	2.3	31.2	107	69	3.1	15	19	28	3.8	228	1	1	3	1	0	1	0	0	0	0	0	1	1	10	81	33	15	7	1	0	0	1	1
56	2	19.6898	93	65	26	100	36.5	96	2.1	45.7143	20.8	149	10	22.5	143	3.3	1.7	13.3	254	32.2	1.2	17.9	189	123	2.7	153	0	1	1	1	0	0	0	0	1	0	0	1	0	11	71	26	15	6	0	0	0	0	0
43	2	24.022	111	68	20	99	37.11	9	2.5	3.6	21.4	44	9.2	13.3	124	3	2.4	22.6	237	51.9	2.1	8	32	113	0.6	317	1	1	3	1	0	0	0	1	0	0	0	1	0	11	52	24	13	3	0	0	0	1	1
49	2	31.4413	128	76	19	99	37.06	44	2.9	15.1724	23.5	82	8.5	19.1	130	5.4	9.4	31.9	216	41.2	2.9	3.2	26	40	2.5	225	1	1	3	1	0	1	0	0	0	0	0	1	0	14	99	39	13	7	0	1	1	1	1
55	2	23.0247	125	92	20	100	37.5	26	1.9	13.6842	18.8	48	8.8	15.5	129	4.4	3.1	21.3	219	45.6	1.9	4.3	577	817	1.5	399	1	1	3	1	0	1	0	0	0	0	0	1	0	7	76	39	15	7	0	0	0	1	1
58	2	24.8016	111	39	18	99	36.72	17	3	5.66667	13.4	197	7.5	15.1	137	3.6	2	12.3	319	25.8	1.1	0.4	42	78	1.2	233	0	0	0	1	0	1	0	0	0	1	0	1	0	2	53	32	15	7	0	0	1	0	0
61	1	28.8695	96	81	17	100	36.67	46	3.1	14.8387	12.7	135	7.3	15.2	130	4.2	1.3	17.3	98	23.3	1.6	4.9	22	74	3.9	149	0	1	3	1	0	0	0	0	0	0	0	1	0	8	64	34	14	5	0	0	1	0	0
52	1	28.0612	103	108	27	95	36.78	17	3.1	5.48387	22.6	183	8.4	20.4	137	3.8	1.6	23.9	259	51.4	2.2	12.8	16	77	1	422	0	1	3	1	0	0	0	1	1	0	0	1	0	8	53	24	14	4	0	0	0	0	0
47	1	37.2023	90	57	28	94	36.5	64	2.3	27.8261	12.2	78	10.8	17.6	143	4	2.1	21.8	151	45.3	2	7	42	82	1.6	277	1	1	2	1	0	0	1	1	1	0	0	1	1	15	67	41	13	5	0	0	0	1	1
58	2	26.6436	68	64	29	92	37.39	209	4.8	43.5417	12.3	66	8	17.7	129	4.2	2.2	23.8	204.822	32.5	2.2	4.1	21	45	7.2	151	1	1	3	1	0	1	0	0	1	0	0	1	1	16	85	46	15	9	0	1	0	1	1
58	2	22.4253	106	6116	16	92	36.5	29	4.2	6.90476	14.1	149	8.1	26.2	134	3.3	2.5	28	134	50.5	2.5	2.2	14	32	3.2	273	1	1	2	1	0	0	0	1	1	0	1	1	0	14	93	38	6	6	0	0	1	1	1
61	2	19.0785	83	93	18	100	37	48	3.2	15	15.5	221	9.2	20.7	129	4.8	1.7	16.6	310	37.8	1.5	40.7	137	365	5	491	0	1	3	1	0	1	0	0	1	0	0	0	0	12	52	29	15	7	1	0	0	1	0
61	2	35.7132	44	79	11	98	37.11	13	3.1	4.19355	5.3	68	12.3	15.7	145	3.4	1.2	12.4	291	36.7	1.1	0.6	41	99	1	192	0	1	2	1	0	1	0	0	0	0	0	0	0	5	15	29	15	10	0	1	0	0	0
67	2	25.4571	125	57	14	100	37	14	1.3	10.7692	3.9	36	7.5	14.6	144	5.3	4.8	20	124	61.4	1.9	1.5	1010	12125	1.3	489	1	1	3	1	0	0	0	0	0	0	0	1	0	16	89	45	15	5	1	1	0	1	1
72	2	36.9903	69	75	20	89	37.22	54	2.3	23.4783	20.1	138	11.7	15.5	134	5.5	2	13.5	246	27	1.2	2.7	32	44	0.9	201	1	1	2	1	0	1	1	0	0	0	0	1	0	11	53	35	15	10	0	0	1	1	1
33	2	32.6077	73	62	7	95	36.94	56	2.8	20	24.2	89	9	18.9	133	3.6	1.4	42.1	200	45.9	3.9	37.6	37	90	7	246	0	1	3	1	0	0	0	1	0	0	0	1	0	15	69	18	14	3	1	1	0	0	0
54	2	31.2397	92	98	18	96	36.5	18	2.1	8.57143	39.4	251	9.9	14.9	138	4.7	8.7	17.5	204.822	29.6	1.6	0.8	60	98	1.2	378	0	1	1	1	1	0	0	1	0	1	0	1	0	9	42	31	15	10	1	0	0	1	0
65	1	31.4276	109	77	22	94	37	16	2.7	5.92593	12.7	117	9.3	19	141	3.4	3.4	27.1	204.822	84.8	2.5	5.7	40	52	1	473	0	1	3	1	1	0	0	0	1	0	0	1	0	10	66	42	13	4	1	0	1	0	0
61	2	27.6006	84	74	20	100	37.83	13	2.3	5.65217	9.7	131	9.8	13.2	136	3	6	20.8	206	36.4	1.9	3.4	36	89	1.3	199	1	1	2	1	0	0	0	0	0	0	0	1	0	12	61	35	15	5	0	0	1	1	1
60	2	24.3389	98	84	16	97	37.06	16	2.8	5.71429	5	51	8.8	17.7	134	3.8	2	29.9	186	42.6	2.9	11.2	73	125	0.7	482.686	1	1	3	1	0	0	0	0	0	0	0	1	1	10	59	45	14	5	0	1	1	1	1
67	2	27.5652	93	83	21	100	37.11	61	3.6	16.9444	7	34	6.4	21.8	138	5.1	2.2	33.9	109	48.3	3.1	11.2	26	55	2.1	170	1	1	1	1	0	1	0	0	0	0	0	1	0	14	61	31	15	9	1	0	0	1	1
55	2	30.5833	101	85	31	99	37.56	5	2.3	2.17391	8.9	247	9	19.5	135	3.4	1.1	15.1	529	38.7	1.4	18.1	20	64	0.5	525	1	1	2	1	1	1	0	0	0	1	0	0	1	6	50	38	14	5	0	0	1	1	1
57	1	25.5709	102	60	27	95	37.28	27	3.2	8.4375	7.6	95	8.7	15.5	118	5.2	1.9	19.6	103	43.5	1.8	5.1	30	94	1.7	270	0	1	1	1	0	0	0	0	1	0	0	1	0	6	52	26	15	9	1	0	0	0	0
55	2	30.5414	104	67	23	97	36.56	57	2.7	21.1111	15.8	15	9.3	13.3	117	4.8	5.4	35.7	82	57.3	3.2	14.2	25	76	3.6	241	0	1	3	1	0	0	0	0	1	0	0	1	0	12	90	34	15	5	0	1	1	0	0
35	1	24.6465	91	81	14	90	36.89	37	2.8	13.2143	12.9	64	6.5	20.2	132	4.8	1.4	32.7	88	52.4	3	23.7	34	71	0.8	466	0	1	2	1	0	0	0	1	1	0	0	1	0	10	63	26	14	4	1	0	0	0	0
51	1	33.9761	60	100	22	99	36.67	9	3	3	2.9	91	10.7	16.8	145	3.2	1.6	23.4	204.822	37.2	2.1	1.5	21	67	0.5	277	0	1	3	1	0	0	0	0	0	0	0	0	0	5	35	25	15	4	0	0	1	0	0
43	2	20.5441	126	50	15	98	36.56	15	2.8	5.35714	13.5	76	9.6	20.3	131	4.2	2.2	16.9	158	32.5	1.5	8.5	740	2172	0.6	308	1	1	2	1	0	0	0	0	0	0	0	1	0	6	53	33	15	3	0	0	1	1	1
67	2	33.414	77	65	17	94	36.61	39	2.6	15	7.2	72	9.2	14.3	134	2.8	2.4	23.8	204.822	39.9	2.2	3.1	26	64	2.4	149	0	1	3	1	0	0	0	1	1	0	0	1	0	13	81	46	10	6	0	0	0	0	0
60	2	44.502	82	72	15	100	36.44	90	3.3	27.2727	11.3	132	8.4	20.2	135	4.6	3	25.8	84	65.7	2.4	5.3	20	38	3.5	264	0	1	3	1	1	0	0	1	0	0	0	1	0	8	61	25	14	5	1	1	1	1	1
50	2	48.2568	105	98	22	76	37.06	41	3.1	13.2258	29.1	154	15.6	19.2	128	5.4	1.8	17.8	204.822	41.6	1.6	2.2	28	60	2.1	284	0	1	2	1	0	0	1	0	1	0	0	0	1	12	78	26	15	6	0	0	0	0	0
41	2	37.0271	107	63	15	94	37.22	20	2.6	7.69231	21.6	114	7.5	21.4	136	4.6	1.7	24.8	204.822	38.7	2.3	15.3	28	130	1.5	289	1	1	3	1	0	0	0	1	0	0	0	1	0	10	58	25	15	5	0	0	0	1	1
76	2	30.1162	97	73	19	98	36.5	17	3.2	5.3125	11.1	91	11.5	17.5	144	4.1	2.5	17.3	331	30.6	1.6	1.4	30	59	0.8	419	1	1	3	1	1	0	0	0	1	0	0	1	0	8	37	42	9	9	0	0	1	1	1
61	2	34.4742	90	63	18	92	37.33	88	3.4	25.8824	21.8	114	6.2	23.9	131	4.2	5	21.3	156	40	1.9	20.1	38	116	1.8	591	1	0	0	1	1	0	0	1	0	0	0	1	0	9	62	20	15	5	0	0	1	1	1
58	2	32.4546	68	48	12	97	36.78	26	2.5	10.4	16	178	8.3	16.8	141	4.4	3.3	20.4	108	44.9	1.9	19.1	25	71	1.4	253	0	1	3	0	1	0	0	1	0	0	0	0	0	10	49	39	15	4	0	0	0	1	0
58	2	39.1088	54	63	18	94	36.28	52	4.3	12.093	2.2	48	10.4	23.5	141	4.2	2.6	18.8	91	33.9	1.7	11.6	16	31	1.8	316	0	1	3	1	0	1	1	0	1	0	0	1	1	10	90	34	12	9	0	0	1	1	1
57	2	29.9027	88	71	17	96	36.67	48	2.4	20	7.7	26	8.9	18.4	134	5	4.7	19.5	124	89.4	1.8	4.2	263	308	3.3	632	1	1	3	1	0	0	0	0	0	0	0	1	0	16	72	47	15	6	1	1	0	1	1
54	1	30.5768	92	53	27	99	35.72	22	2.3	9.56522	15.8	173	8.5	15.3	143	3.3	2.1	21.8	204.822	71.2	2.1	22.8	25	87	1.1	312	1	1	2	0	1	0	0	1	0	0	0	1	0	7	71	30	15	4	0	0	1	1	1
54	2	23.6615	95	110	20	100	38.67	43	2.1	20.4762	11.1	39	11.2	19.5	145	4.2	3.3	17.2	218	36.6	1.6	9.9	168	230	4.6	222	0	1	3	1	0	0	0	1	0	0	0	1	0	14	97	43	10	4	0	0	0	0	0
58	2	21.4619	83	65	21	100	36.83	49	3.1	15.8065	5.8	133	6	18.6	130	4.6	6	22.4	137	35.7	2	0.9	19	93	3.8	260	0	1	3	1	0	0	1	1	0	0	0	1	0	8	48	31	15	11	1	0	1	0	0
55	2	32.8975	119	78	24	97	36.06	68	3.5	19.4286	10.8	79	7.5	17.4	147	3.9	1.5	24	153	46.9	2.3	7.9	21	59	2	242	0	1	3	1	0	0	0	1	1	0	0	1	1	9	74	25	13	5	0	0	1	1	1
68	1	27.7069	84	67	18	100	37.44	15	2.6	5.76923	10.7	72	10.2	14.9	139	5.1	8.7	19	161	32.5	1.8	2.4	2481	2699	0.8	9575	0	1	3	1	0	1	0	1	1	0	0	0	0	10	67	33	15	8	1	1	0	0	0
59	2	41.8084	92	82	15	97	37.33	28	2.4	11.6667	20.3	109	8.5	17.2	131	5.2	1	22.3	164	45.7	2.1	7.9	576	883	1.4	274	0	1	2	1	1	0	0	0	1	0	0	1	0	14	49	32	15	5	1	1	0	0	0
66	1	24.6244	126	96	25	96	36.28	24	2.4	10	15.8	80	10	14.1	135	3.5	3	19.8	298	43.9	1.8	4.8	73	235	1.9	159	0	1	2	1	0	0	0	1	0	0	0	0	0	13	55	37	15	5	1	0	0	1	0
53	1	36.2084	94	61	16	91	36.72	101	3.5	28.8571	18	41	7.2	33.8	136	3.9	2.2	33.8	171	55.3	3.1	38.2	32	77	3	511	0	1	3	1	0	0	0	0	0	0	0	1	0	14	93	34	13	4	1	1	1	1	1
59	1	36.4924	73	78	21	99	36.72	57	4.3	13.2558	10.7	103	8	16.3	135	5.3	1.2	18.5	204.822	53.4	1.7	5.6	18	30	1.8	173	1	1	3	1	0	1	0	0	0	0	1	1	0	8	51	37	15	6	0	0	1	1	1
41	1	34.4386	112	64	24	96	37.78	33	3.2	10.3125	21.6	157	7.2	21	143	3.3	3.8	14.8	209	29.4	1.4	8.5	91	157	0.5	282	0	1	3	1	0	0	0	1	1	1	0	1	0	12	99	48	6	4	0	0	1	1	1
58	2	31.7106	119	68	25	92	36.94	15	3.3	4.54545	25.9	349	7.4	17.4	126	4.4	2.8	20.1	287	40	1.8	17.6	12	110	3.3	214	1	1	3	1	1	0	0	1	0	0	0	1	0	10	78	44	14	6	1	0	1	1	1
55	2	25.4694	84	103	18	95	36.67	44	2.8	15.7143	11.4	109	9.7	18.4	127	5.3	7.8	23	220	53.5	2.1	17.6	295	475	1.4	168	0	1	2	0	0	0	0	1	0	1	0	1	0	11	75	32	10	4	1	0	0	0	0
52	2	32.2421	45	97	20	100	36.72	62	2.2	28.1818	22	112	8.8	14.6	137	5.4	3	18.9	108	38.1	1.7	5.4	906	1740	4	342	0	1	3	1	0	0	0	1	1	0	0	1	0	18	101	25	9	6	0	1	0	0	0
59	1	29.2011	74	72	28	98	36.39	186	2.8	66.4286	31.4	163	10.9	17.2	127	4.2	1.1	18.8	189	40	1.7	32.8	98	194	8.1	480	1	1	3	1	0	0	0	1	0	0	0	1	0	13	89	54	12	4	0	0	1	1	1
71	2	24.8016	61	57	18	97	36.94	33	3.6	9.16667	10.4	168	8.4	14.6	138	4.2	1.1	27.7	281	39	2.5	0.9	16	18	2	164	0	0	0	1	0	1	1	0	0	1	0	0	0	3	42	28	15	11	0	0	0	1	0
67	2	26.644	113	85	23	92	38.17	70	2.1	33.3333	14.3	548	10.5	15.9	136	4.8	1.8	14.6	204.822	28.3	1.3	1.2	16	35	1.9	210	1	1	2	1	0	1	0	0	0	0	0	1	0	3	43	19	15	10	0	0	1	1	1
80	1	25.5102	76	71	17	98	36.44	27	2.7	10	20.8	202	7	18.1	130	4.2	1.3	12	204.822	32.3	1.1	0.4	3	18	1.5	482.686	0	1	2	0	1	0	0	1	0	0	0	0	0	5	52	33	15	6	0	0	1	1	1
45	2	23.4704	73	99	14	100	36.89	25	2.7	9.25926	6.2	54	7.5	17.8	140	5.5	5.8	16.8	183	39.2	1.5	21.1	279	583	1.5	482.686	1	1	3	0	0	1	0	0	0	0	0	1	0	13	66	28	15	4	0	1	0	1	1
55	1	24.3056	112	86	25	93	36.61	110	3.4	32.3529	21.7	63	10.3	17.9	135	4.5	3.21904	24.5	147	35.6	2.3	7.3	30	59	1.5	1113	0	1	3	0	0	1	0	1	0	0	0	1	0	11	71	24	14	7	0	1	0	0	0
55	2	28.3447	93	93	15	100	37.33	20	2.5	8	7.1	149	8.6	23.9	132	4.3	1.8	21.5	108	32.1	2	6.6	49	136	1.2	355	0	1	2	1	0	0	0	0	1	0	0	1	0	2	50	35	15	17	1	0	0	1	0
69	1	28.393	53	87	13	99	35.17	122	4.5	27.1111	11.8	62	8.9	19	139	5.4	3	28.3	84	51.4	2.7	9.7	26	38	6.5	235	1	1	3	1	0	1	0	0	1	0	0	1	0	14	82	42	11	8	1	1	0	1	1
54	2	27.3172	93	77	15	92	36.72	22	3.8	5.78947	3.8	52	7.5	17.2	122	5	1.6	20	204.822	42.4	2	6	20	66	0.8	183	1	0	0	1	0	0	0	0	0	0	0	1	0	7	33	21	14	5	1	0	1	1	1
51	1	41.0938	87	66	17	99	36.44	33	3.2	10.3125	10.1	63	9.6	13	114	4.6	3.21904	18.7	204.822	53.3	1.8	5.2	25	54	1.6	245	0	1	3	1	0	0	0	0	0	0	0	1	0	10	71	26	15	4	0	1	0	0	0
70	1	22.782	58	65	15	100	36.39	12	1.3	9.23077	3.5	102	7.1	16.8	126	4.1	1.9	25.3	125	46.9	2.3	4.9	82	149	0.5	241	1	0	0	0	0	0	0	0	1	0	0	1	0	6	54	28	14	6	0	0	1	1	1
51	1	21.2654	85	104	17	97	37.56	11	3.5	3.14286	3.1	52	13.2	19.9	140	3.2	0.9	18.5	204.822	36.4	1.7	4.4	28	82	0.3	175	1	1	3	1	1	0	0	0	1	0	0	1	0	8	53	35	9	5	0	0	0	1	1
59	1	29.948	96	68	21	91	36.5	23	3.5	6.57143	8.2	178	9	16.5	125	3.9	1.5	17.7	382	62.2	1.6	10	17	32	1.3	162	0	1	3	1	1	1	0	0	1	1	0	1	0	5	60	29	15	5	1	0	0	1	0
58	1	26.5377	82	68	22	92	37.39	16	3.1	5.16129	1	101	8.7	16.4	129	4	1.4	19.2	152	38.1	1.8	1.6	249	183	0.6	854	1	0	0	0	0	0	0	0	0	0	0	1	0	6	36	18	15	7	0	0	0	1	1
52	1	26.4516	93	72	13	97	36.83	42	3.3	12.7273	7.4	118	10	25.9	132	5.6	2	22.5	129	43.3	2.1	11.7	23	44	1	184	1	1	2	1	0	0	0	0	1	0	0	1	0	5	59	33	15	6	1	0	1	1	1
57	2	19.8347	119	77	19	100	37.83	7	2.4	2.91667	5.5	70	8.7	13.8	130	3.4	1.5	10.9	204.822	34.7	1	2.7	157	72	0.5	482.686	1	1	2	1	1	0	0	0	1	1	0	0	0	5	49	33	15	8	0	0	0	1	1
49	1	26.8858	75	72	20	94	36.67	84	5.2	16.1538	6.2	42	6.7	22.1	134	4.3	2.3	29.1	77	64.1	2.9	20	25	42	3	194	0	1	3	1	0	0	0	0	0	0	0	1	0	12	89	29	14	3	1	1	0	0	0
48	1	30.5859	141	117	26	88	37.61	16	3.8	4.21053	26.8	292	7.8	21.7	138	4.2	4.3	26.9	183	44.1	2.5	22.8	29	134	1.4	179	1	1	3	1	1	0	0	1	1	1	0	1	0	15	92	50	15	3	1	0	1	1	1
64	2	25.6	108	57	15	97	34.56	6	3.1	1.93548	16	88	15.1	17.5	144	3	2.6	17.9	204.822	57	1.6	2.1	133	327	0.6	214	0	1	2	1	1	0	0	0	1	1	0	1	0	6	55	37	15	6	1	1	0	0	0
68	1	32.494	64	74	12	100	36.5	35	2.9	12.069	2.5	24	6	24.1	141	4.3	1.4	25.6	172	120.2	2.4	10.9	86	164	1.5	482.686	0	1	3	1	0	0	0	0	1	0	0	1	0	14	65	35	15	7	1	1	1	0	0
60	2	29.2101	83	59	19	96	36.67	84	4.2	20	14.5	42	9.2	17.6	127	4	1.3	31.6	204.822	63.8	3.3	3.7	11	16	3.2	103	1	1	3	1	0	1	0	0	1	0	0	1	0	10	74	33	15	6	1	1	0	1	1
46	1	21.4711	86	73	13	100	36.17	86	2.8	30.7143	15.2	45	9.6	23	138	3.9	2	20	204.822	42.9	1.8	33.6	46	66	4	210	1	1	3	1	0	0	0	1	0	0	0	1	1	18	72	35	15	3	0	1	0	1	1
23	2	22.2041	100	97	20	100	37.28	5	3.3	1.51515	1.7	101	9.4	21.8	146	3.2	0.6	13.5	290	45.9	1.2	0.3	60	102	0.6	799	0	0	0	1	0	0	1	0	0	0	0	0	0	4	16	6	12	8	0	0	0	0	0
58	2	36.864	146	83	33	99	37	14	2.2	6.36364	12.7	139	10.4	19.4	132	7.3	4.7	19.4	118	40.2	1.8	1.2	35	65	0.8	376	1	1	3	1	1	0	1	0	1	0	0	1	0	4	50	34	14	9	0	0	1	1	1
73	2	34.8639	84	88	11	96	36.89	17	3.5	4.85714	8.1	72	8	21.6	139	3.6	3.21904	25.2	130	39.7	2.3	9.3	32	44	0.5	308	0	1	2	0	1	0	0	0	0	0	0	1	0	7	43	22	13	7	0	1	1	0	0
56	2	49.4969	86	61	20	86	36.72	7	3.4	2.05882	5.5	143	14.9	14.7	137	3.2	2.2	14.6	204.822	30.2	1.3	1.1	17	15	1	205	0	1	2	1	1	1	0	0	0	1	0	1	0	3	35	25	15	5	0	0	0	0	0
73	1	37.4504	81	56	14	97	36.78	31	3.9	7.94872	6.2	120	9.4	14.2	114	4.8	2.6	21.4	204.822	84.6	2	4.7	18	77	1.7	258	1	1	3	1	0	0	1	0	0	0	0	1	0	5	60	22	15	11	1	0	1	1	1
52	1	33.0864	107	88	23	89	37.83	15	2.5	6	17.2	118	6	22.1	137	3.9	1.2	26.1	107	44.6	2.4	6.7	20	41	0.4	182	0	1	3	1	1	0	0	1	1	0	0	0	0	13	51	38	14	4	1	0	0	0	0
59	2	30.3234	122	99	38	91	36.83	93	2.3	40.4348	13.1	273	9.1	17.3	138	4.3	0.8	21	692	28.2	1.9	7.9	22	38	3.9	351	0	1	3	1	0	0	0	1	1	0	1	1	0	9	90	39	11	4	0	0	0	0	0
67	2	24.2078	100	70	20	98	36.67	50	1.9	26.3158	14.2	94	8.2	22.5	137	3.9	3.21904	21.9	62	50.2	2	3.7	56	81	1.1	292	1	1	1	0	0	0	0	1	0	1	0	1	0	10	70	41	14	5	0	0	0	1	1
58	1	21.6025	85	78	20	100	35.94	78	2.4	32.5	9.2	96	10.3	17	133	3.2	1.3	12.6	204.822	34.8	1.1	1.7	30	32	2.8	305	1	1	3	1	0	0	1	0	1	0	0	0	0	9	68	33	15	7	0	0	1	1	1
61	1	37.9731	72	153	16	98	35.28	60	3.7	16.2162	16.4	96	10.2	21.9	138	3.9	1.7	25.9	78	57.2	2.5	18.4	57	125	3.2	342	0	1	3	1	0	0	0	0	0	0	0	1	1	17	108	41	7	5	1	1	0	0	0
60	1	23.03	99	64	31	98	36.67	25	3.7	6.75676	8.8	78	7.4	16.8	140	4.6	5.7	22.1	204.822	32.7	2	1.6	11	29	1.3	142	1	1	3	1	0	0	0	1	0	0	0	1	0	7	52	38	12	7	0	0	1	1	1
64	1	34.375	105	50	24	99	36.33	28	3.3	8.48485	13.4	104	6.8	15.9	131	4.9	6.6	21.3	244	27.7	1.9	5.1	14	54	1.3	749	1	1	3	1	0	1	0	0	0	0	0	1	0	9	66	38	15	8	0	0	0	1	1
57	2	43.1556	81	58	20	90	36.56	33	3.7	8.91892	9	54	8.1	20.5	138	4.3	2.2	19.8	171	39.6	1.8	6.6	14	45	8.4	205	1	1	3	1	0	1	1	1	0	1	0	1	0	18	64	41	13	6	1	1	1	1	1
55	2	24.2612	73	77	18	100	37.33	99	3.4	29.1176	7.7	112	10.2	22.7	142	3.9	1.3	20.9	172	71.2	2.1	55.6	51	120	7.8	608	1	1	3	1	1	0	0	0	0	0	0	1	0	11	82	30	12	4	1	1	0	1	1
56	2	24.093	97	69	24	98	37.72	9	3.1	2.90323	9.8	88	10.7	14.8	136	3.6	1.6	14.5	204.822	31.2	1.3	1.8	26	121	0.6	227	0	1	2	1	0	0	0	1	1	0	0	1	0	12	52	42	11	6	0	1	0	0	0
76	1	32.5567	68	71	21	98	37.06	28	2.7	10.3704	13.4	161	9.1	15.8	137	4.1	1.3	23.3	394	31.8	2.1	5.6	53	44	0.7	269	0	1	3	1	0	0	1	0	0	1	0	0	0	7	32	35	15	5	0	0	0	0	0
68	2	31.5334	68	82	15	99	36.94	14	2.6	5.38462	15.8	114	11.3	15	140	3.8	4.4	18.4	106	45.9	1.7	3.3	517	624	0.6	482.686	0	1	2	1	0	1	0	1	0	0	0	1	0	6	39	30	15	6	0	1	0	0	0
51	2	27.4235	77	94	14	100	36.44	6	3.2	1.875	2.8	54	9	15.9	139	3.6	0.9	17.3	204.822	36.6	1.6	2.2	38	120	0.5	228	0	0	0	0	1	0	0	0	0	0	0	0	0	6	37	35	11	4	0	0	0	0	0
53	1	24.0999	114	93	19	100	36.67	28	2.8	10	10.8	90	11.9	16.6	138	4.2	4.5	18.7	204.822	34.6	1.7	2.1	79	87	1.2	469	0	1	2	1	1	1	0	0	0	0	0	1	0	5	45	35	15	3	1	1	0	0	0
43	2	25.5102	111	117	20	90	37.44	14	3.1	4.51613	3.6	21	7.2	21.1	136	3.3	1.6	31.5	204.822	40.7	2.9	14.3	34	228	0.7	314	0	1	2	1	0	0	0	1	0	0	0	1	0	12	55	22	14	3	0	0	0	1	0
33	1	23.4343	89	75	14	96	36.39	15	2.3	6.52174	20.3	102	9.3	20.2	127	4.6	3.1	24.2	204.822	59.6	2.2	0.6	6	41	0.7	693	0	1	2	1	0	0	0	0	0	0	0	0	0	7	52	30	15	7	0	0	1	0	0
68	2	35.9596	53	78	18	99	36.83	35	2.9	12.069	6.4	195	13.3	20.2	151	4.6	3.21904	16.6	275	27.4	1.5	0.3	27	22	1.1	130	0	1	2	1	0	0	1	1	0	0	1	0	0	2	29	31	15	5	0	0	0	0	0
32	1	29.1064	71	70	15	100	37.72	6	2.7	2.22222	1.9	66	5.8	17.5	142	4.5	1.6	18.8	109	48.3	1.7	6.8	33	56	0.6	186	0	1	2	1	0	0	0	1	0	0	0	1	0	7	27	29	15	4	1	1	0	1	0
74	2	29.2359	75	55	20	100	37.06	18	2.5	7.2	15.2	101	12.3	14.1	143	5.9	1.9	16.1	195	59.1	1.5	0.5	166	158	1.8	1448	0	1	3	1	0	0	0	0	0	0	0	0	0	12	65	27	15	7	1	1	1	0	0
70	1	27.4235	83	74	15	98	37.44	44	3.6	12.2222	4.6	43	8.6	21.7	134	4.8	1.9	20.3	66	45.3	1.9	7.3	31	48	1.6	216	1	1	2	1	0	0	0	0	0	0	0	1	1	9	68	34	13	5	0	0	1	1	1
60	1	40.7713	68	50	8	99	36.94	87	2.4	36.25	12.2	228	9.7	14.8	139	3.6	1.1	11.8	402	64.8	1.1	0.9	36	62	3.1	482.686	0	1	3	1	0	1	1	0	1	1	0	0	0	13	95	40	3	11	0	0	1	0	0
43	2	38.6628	90	65	16	92	36.44	22	2.5	8.8	27.5	226	6.2	18.2	120	5.4	8.2	35	118	150	3.2	11.5	103	464	1.2	341	1	1	3	1	1	0	0	0	0	0	0	0	0	7	80	24	15	4	1	1	1	1	1
55	1	27.6361	114	100	37	92	37.56	27	2.8	9.64286	5.9	25	10.9	14.5	139	3.7	2.6	18.7	567	32.8	1.7	1.4	48	130	0.7	681	0	1	2	1	1	1	0	1	1	0	1	1	0	5	45	34	14	7	0	0	1	0	0
36	1	18.1406	106	69	20	90	36.44	13	3.1	4.19355	0.5	72	10.2	15.2	143	4.4	8.1	59.3	310	43.7	5.4	5.5	446	1670	1.3	965	0	1	1	1	0	1	0	0	0	0	0	1	0	7	70	26	15	3	0	0	0	0	0
70	2	25.2268	114	72	17	88	37.67	13	3.2	4.0625	33.1	197	11.6	13.8	130	4.2	4.1	11.6	204.822	31.3	1.1	0.3	26	23	1	477	0	1	2	1	0	1	0	1	1	0	0	0	0	9	49	40	15	15	0	0	0	0	0
52	2	31.5617	63	90	11	98	37.33	22	3.3	6.66667	20.4	141	15.6	14.6	141	4.5	1.5	12.3	204.822	33.5	1.1	0.7	33	31	1.4	412	1	1	3	1	1	0	0	0	1	0	0	1	0	9	32	27	15	7	0	1	1	1	1
46	1	44.0771	63	79	14	100	-17.78	53	3.3	16.0606	7.9	71	8.8	21.8	129	5.6	1.3	19.8	48	53.2	1.8	2.3	12	26	3.2	198	0	1	3	1	0	0	0	0	1	0	0	1	0	15	70	48	14	6	1	1	0	1	0
52	2	31.3092	140	93	16	97	36.89	17	1.6	10.625	9	71	8.1	17.9	140	4.9	5.6	21.5	83	45.9	2	4.2	14	48	0.6	207	1	1	3	1	0	0	0	0	1	0	0	1	0	10	65	38	15	5	1	1	1	1	1
53	2	25.1559	114	94	17	98	36.78	38	2	19	7.8	79	9	16.4	116	4.2	2.3	36	194	58.7	3.3	18.8	58	135	4.6	263	1	1	1	1	1	0	0	1	1	0	0	1	0	10	81	31	15	4	0	0	1	1	1
59	2	29.4076	98	86	18	99	37.06	52	3.6	14.4444	10.1	60	7.6	21.5	134	6.1	3.21904	25.2	97	50.9	2.3	11.5	28	75	0.9	221	1	1	1	1	0	0	0	0	0	0	0	1	0	10	74	33	9	5	1	1	0	1	1
48	2	26.4871	115	85	26	96	37	73	2.8	26.0714	14.9	45	8.2	22.5	147	3.9	2.7	35.2	133	63.3	3.3	43.5	20	37	3.3	403	0	1	3	1	1	1	0	1	1	1	0	1	0	14	98	36	13	4	1	0	1	0	0
58	1	26.2712	97	94	15	98	36.56	40	2.9	13.7931	53.3	362	6.1	24.9	135	4.9	1.7	20.9	233	46.1	1.9	18.7	96	114	0.9	241	1	1	3	1	1	0	0	1	1	1	0	1	0	15	121	46	3	4	1	0	1	1	1
56	1	24.8097	114	57	25	92	36.56	42	4	10.5	15.1	60	6.6	24.2	145	3.3	3.6	22.9	204.822	62.7	2.1	3.1	7	37	4.4	212	1	1	3	1	0	0	0	0	0	0	1	1	0	11	57	25	13	6	0	0	1	1	1
75	1	27.9904	44	75	25	93	36.67	33	3.9	8.46154	21.7	319	8.5	18.5	133	5	1.3	15	269	31.1	1.4	2.1	21	31	1.1	285	1	1	3	1	1	0	0	0	1	1	0	1	0	8	53	22	15	7	0	0	1	1	1
53	1	31.002	103	66	14	94	37.33	14	4.8	2.91667	5.5	65	6.5	18.4	128	4.1	3.3	27.3	71	150	2.5	4.3	13	32	1	106	1	1	2	1	0	0	0	0	1	0	0	0	1	6	48	27	14	4	0	0	1	1	1
64	2	31.5334	73	92	19	100	37.67	6	3.4	1.76471	7.3	315	11.2	13.7	135	3.8	3.21904	19.1	204.822	66.8	1.7	0.5	15	25	0.9	128	1	0	0	1	0	0	0	0	1	0	0	1	0	2	30	22	10	6	0	0	0	1	1
39	1	54.7052	79	98	14	100	36.89	5	2.9	1.72414	4.4	33	9.3	18.8	137	3.5	2.2	27.7	99	41	2.5	8.2	27	97	0.5	361	0	1	2	1	0	0	0	1	1	0	0	1	0	8	37	22	14	3	0	1	1	0	0
25	2	23.1419	100	81	10	95	36.78	41	4.5	9.11111	7	177	14.4	13.1	117	5.3	1.3	22.2	204.822	43.9	2	2.3	53	30	3.8	122	0	1	3	0	0	0	0	1	0	0	0	1	0	7	67	29	15	3	0	0	0	0	0
50	2	19.8804	118	61	19	93	36.28	14	3.7	3.78378	5.1	216	8.3	15.2	140	3.9	3.9	19.1	302	38.9	1.7	0.9	30	85	1.4	118	1	1	2	1	1	0	0	0	1	0	0	1	0	7	31	24	15	3	0	0	1	1	1
62	1	28.1203	74	57	17	89	36.61	18	2.7	6.66667	6.8	60	6.7	18.1	132	4	1.9	18.1	148	45.4	1.7	2.8	37	105	0.7	317	0	1	3	1	0	0	0	0	0	0	1	1	0	8	39	22	15	7	0	0	1	1	1
61	2	30.3347	100	71	29	100	36.56	38	2.5	15.2	9.8	98	9.5	20	134	4.3	5	17	159	48.5	1.6	7.7	30	84	4.1	323	0	1	3	1	0	0	0	0	0	0	0	1	1	15	86	43	12	7	0	0	1	1	1
54	2	22.4632	120	84	25	91	36.78	14	2.9	4.82759	14	123	8.7	17.2	145	3.7	7.3	30.5	118	49	2.8	2.7	18	45	1	226	0	1	3	1	0	0	0	1	1	0	0	1	0	13	60	37	14	7	1	1	1	1	1
72	2	22.0386	58	51	14	100	35.33	36	2.4	15	20	266	9.5	15.9	134	4.8	1.3	19.7	247	42	1.8	4.4	36	67	1	151	1	1	2	1	1	0	1	0	1	0	0	1	0	4	62	29	15	8	1	0	1	1	1
61	2	26.8274	99	92	18	93	37.06	48	2.6	18.4615	8.2	37	7.3	18.5	136	4.7	3.7	22.7	59	46.4	2.1	12.1	28	77	1.3	460	1	1	3	0	1	0	0	1	0	0	0	1	0	12	41	30	15	5	0	0	1	1	1
54	2	32.0898	81	88	20	100	36.94	26	2.2	11.8182	6.4	51	8.5	19.3	139	3.9	4.1	18.2	179	34	1.7	4.2	154	421	1.2	186	1	1	2	1	0	0	0	0	0	1	0	1	0	11	38	25	15	7	1	1	1	1	1
46	2	32.1289	70	63	29	94	39.22	94	4.4	21.3636	13.1	54	8.5	18	142	4.5	1	23.2	121	67.1	2.2	5.4	44	87	4	482.686	0	1	3	0	0	0	0	0	1	0	0	1	0	9	79	31	15	5	1	0	1	1	1
53	1	19.1001	89	105	19	100	37.5	14	2.1	6.66667	9.8	59	10.3	16.9	133	4.5	2.4	24.7	127	35.5	2.3	5.3	1191	2327	0.8	217	0	1	2	1	1	0	0	0	0	0	0	1	0	7	47	32	15	4	0	0	0	0	0
53	1	21.4207	98	50	18	100	37.56	44	2.7	16.2963	18	64	8.9	19.8	138	3.9	4.1	26	209	38.9	2.4	7.7	293	574	0.9	482.686	0	1	2	1	0	0	0	0	1	0	0	1	0	11	69	31	14	4	0	0	0	0	0
27	1	26.9531	100	68	20	100	37.83	19	2.8	6.78571	7	30	8	16.5	141	5.9	3.1	31.4	131	39.7	2.85	5.5	3792	9066	1.2	3960	0	1	3	1	0	1	0	1	0	0	0	0	0	12	85	30	15	13	0	0	1	0	0
58	2	44.5551	91	78	18	100	37	20	2.8	7.14286	16.8	249	8.9	19.7	139	4	0.9	12.5	519	33.9	1.2	0.4	11	18	1.4	166	0	1	3	1	1	0	1	0	1	0	0	0	0	4	42	43	15	5	0	0	0	0	0
57	2	35.4146	138	104	17	94	37.17	11	2.4	4.58333	8.2	72	8.2	14.6	140	3.1	4.3	24.1	104	43.6	2.2	10	35	143	0.5	294	0	1	3	1	0	0	0	1	1	0	0	1	0	14	63	48	15	7	1	1	1	0	0
59	2	36.3875	112	99	16	96	36.89	15	3.9	3.84615	5.7	42	10.6	20.3	137	4.2	2.1	14.5	232	26.7	1.3	2.9	17	17	0.8	115	0	1	2	0	0	1	0	0	0	0	0	1	0	5	33	28	15	3	0	0	0	0	0
75	2	25.0915	121	109	34	97	36.5	55	3.1	17.7419	15.9	135	10.3	17.3	153	3.8	4	18.4	302	28.9	1.7	1.9	61	333	1.6	460	1	1	3	1	0	1	0	1	1	0	0	1	0	11	84	51	13	11	0	0	1	1	1
74	2	36.4299	99	47	24	95	36.56	103	3	34.3333	19.8	120	7.2	20.9	138	4.2	3.6	18.2	219	32.4	1.7	1.1	27	40	1.8	302	0	1	1	1	0	1	1	1	0	1	0	0	0	8	62	44	14	11	0	0	0	0	0
74	2	37.3795	99	79	11	94	36.44	80	3.7	21.6216	9.6	88	7.2	22.9	132	5.1	5.6	22.2	152	39.1	2	11.3	29	67	2.6	305	0	1	3	0	1	0	0	0	0	1	0	1	0	10	82	29	15	6	0	0	0	1	0
50	1	20.0893	112	96	21	95	37.39	10	1.6	6.25	27.4	299	9.2	15.5	133	3.7	3.2	19	367	43.1	1.7	0.9	53	27	1	308	0	0	0	1	0	0	1	0	1	0	0	1	0	0	39	31	15	4	1	0	1	0	0
68	2	27.2377	82	85	26	95	36.78	18	2.7	6.66667	15.6	253	10	18.9	136	3.9	1.3	14.7	204.822	29.8	1.4	1	23	28	0.5	175	0	1	2	1	0	0	1	0	1	0	0	1	0	6	39	33	14	8	0	0	0	1	0
63	1	27.5391	87	77	29	95	37.22	96	5	19.2	20.8	230	7.4	18.6	131	4.5	1.6	15.4	204.822	38.1	1.4	1	12	68	2.2	288	0	1	3	1	1	0	1	0	0	0	0	1	0	7	94	45	15	6	0	0	0	0	0
47	1	25.1027	107	75	19	99	37.11	43	4.4	9.77273	21.2	151	7.3	22.3	143	3.4	2.3	30.7	80	51.2	2.9	45.9	22	38	2.1	148	1	1	2	1	0	0	0	1	1	0	0	1	1	9	65	24	13	3	0	0	1	1	1
51	2	20.415	115	78	34	97	36.44	51	3.6	14.1667	11.6	107	9.7	17.4	139	2.7	1.7	17.1	391	37.7	1.6	24.4	88	100	1	219	0	1	1	1	1	1	0	1	1	1	0	1	1	13	93	40	8	5	0	0	1	0	0
69	2	25.1863	97	46	28	99	36.72	154	2.5	61.6	12.3	394	7.5	16.2	131	5.1	7.3	19.1	257	37.7	1.7	2.3	9	26	4.5	1494	0	1	3	1	0	1	0	1	0	0	0	1	0	17	128	55	12	8	1	1	1	1	1
38	2	36.9233	91	71	23	97	36.39	80	3.1	25.8065	15.4	82	8.4	17.7	130	5	2.4	24.5	195	39.1	2.2	14.5	21	39	6.1	149	1	1	3	1	1	1	0	1	0	0	0	1	0	11	84	28	15	4	0	0	0	1	1
25	2	25.2976	88	64	29	95	37.44	41	2.3	17.8261	9.2	57	11.3	14.7	133	3.7	1.3	24.2	161	33.1	2.2	5.9	36	84	2.8	335	0	1	2	1	0	0	1	1	0	0	0	1	0	10	81	34	8	4	0	0	0	0	0
50	1	24.2042	91	106	20	100	36.44	37	3.5	10.5714	5.7	73	9.6	18	133	5.3	3.21904	19.3	90	55.6	1.8	3.1	22	51	2.2	210	1	1	3	0	1	1	0	0	1	0	0	1	0	8	50	23	14	11	1	1	1	1	1
73	1	31.3021	63	71	14	99	36.33	51	2.4	21.25	11.5	75	8.4	20	135	5.1	1.3	12.9	212	82.5	1.2	1	127	103	1.2	375	0	1	2	1	0	1	1	1	0	1	0	1	0	4	49	19	15	9	0	0	0	1	0
50	2	33.5816	117	76	15	95	38.06	45	2.4	18.75	10.7	167	8.2	18.9	152	3.8	0.9	15.3	204.822	29.3	1.4	0.8	25	41	0.9	172	1	1	3	1	0	0	1	0	1	1	0	1	0	7	65	44	12	3	0	0	1	1	1
40	2	47.1112	118	63	25	88	39.44	49	3.8	12.8947	2	64	8.1	18.9	134	4.3	5.2	34.7	204.822	57.3	3.2	9.1	48	103	2.3	232	1	1	3	0	0	0	0	0	0	1	0	1	0	9	96	35	14	3	0	0	1	1	1
71	2	20.7829	120	74	23	100	37.56	96	2.8	34.2857	20.6	254	10.7	14.4	148	3.8	12.5	14.6	204.822	26.2	1.3	0.5	195	377	4.5	905	1	1	3	1	0	1	0	0	1	0	0	1	0	11	84	49	15	11	0	0	1	1	1
48	1	28.2364	115	73	39	97	36.5	14	2.9	4.82759	2.7	14	9.2	15.8	144	3.8	3.5	18.7	204	29.8	1.7	8.9	427	1811	0.7	709	0	1	2	1	0	0	0	1	0	0	0	1	0	9	72	51	14	4	0	1	1	0	0
33	2	30.1534	109	97	25	96	36.94	46	3.1	14.8387	4.5	260	8	18.2	127	4.4	3.4	20.8	204.822	38.3	1.9	0.5	20	18	1.3	272	0	1	2	0	1	0	0	0	0	0	0	1	0	1	36	22	15	9	0	0	1	0	0
34	1	16.692	99	115	26	86	37.06	64	3	21.3333	8.1	218	8.4	14.6	138	4.7	0.7	10.8	204.822	31.9	1	18	13	16	2.5	160	0	1	2	1	0	1	0	0	1	0	0	0	0	7	66	41	14	5	0	0	0	0	0
67	2	21.4533	83	81	16	97	38.78	35	2.9	12.069	23.1	182	7.8	17.1	126	5	4	17.1	265	43.6	1.6	2	46	91	1.3	983	0	0	0	1	1	0	0	0	1	1	0	1	0	8	54	37	14	7	0	0	1	0	0
61	2	27.4717	91	72	15	96	37.22	28	2.6	10.7692	15.6	135	12.4	12.5	135	4.1	1.5	14.3	405	32.5	1.3	0.8	25	57	2.2	1457	0	1	3	1	0	1	0	1	1	1	0	1	0	11	97	48	3	11	0	0	0	0	0
69	2	20.5151	85	50	10	96	36.61	76	2.4	31.6667	14	55	5.8	14	132	3	3.21904	20	204.822	40	2	18	53	89	4.5	482.686	0	1	1	0	1	0	0	0	1	1	0	1	0	3	40	25	10	5	0	0	1	0	0
63	1	17.7154	74	56	24	98	36.5	28	2.3	12.1739	11.4	89	9	17	142	3.7	2.3	14.9	92	29.2	1.4	7.3	88	87	0.4	341	0	1	1	1	0	0	0	0	1	0	0	1	1	3	38	27	15	9	0	0	1	1	1
33	1	37.7148	94	91	35	100	37.06	35	3	11.6667	15.9	121	7.9	15.5	135	3.7	1.5	36	204.822	47.9	3.3	8.5	16	77	1.5	165	0	1	3	1	0	0	0	0	1	0	0	1	0	11	69	32	8	3	0	0	0	0	0
60	1	25.7812	81	77	12	100	36.78	27	3.5	7.71429	5.6	30	6.5	18.7	146	3.5	1.7	38	83	46	3.5	14.1	20	56	1	235	1	1	2	1	0	0	0	1	0	0	0	1	0	8	38	30	15	10	1	1	1	1	1
59	1	49.4185	106	92	17	92	36.44	34	4.2	8.09524	3	14	6.5	19.2	141	3.5	2.7	18.8	113	43.5	1.7	7.7	33	73	2.8	253	0	1	3	1	0	1	0	0	1	0	0	0	0	11	67	23	14	6	0	0	1	1	1
62	2	30.2737	100	77	26	100	37.5	83	3	27.6667	9.7	227	8.8	17.8	127	8.3	2.1	16	419	33.9	1.5	0.7	16	81	9.4	801	0	1	3	1	0	1	1	0	0	0	0	0	0	12	48	36	15	16	0	0	1	0	0
57	2	33.0796	73	59	21	92	37	23	3.8	6.05263	14.7	51	8	16.9	131	4	2.5	24.8	212	38.3	2.3	2.5	10	45	1.7	609	1	1	3	1	0	0	0	0	1	1	0	1	0	11	68	45	15	5	0	0	1	1	1
54	2	22.7244	121	95	14	97	36.44	11	2.5	4.4	19.6	211	9.6	14	137	3.3	2.7	24.6	326	37.8	2.4	14.7	22	172	0.7	235	0	1	3	1	0	0	0	1	1	1	0	1	1	9	73	45	13	7	1	0	0	1	0
40	2	26.2771	98	108	30	98	37.22	60	2.7	22.2222	28.9	127	13.8	19.5	124	3.8	4.2	21.7	355	35.8	2	31.9	44	91	5.1	377	0	1	3	1	0	0	0	1	0	0	0	1	0	9	76	31	15	4	0	0	0	0	0
51	1	27.1094	76	83	15	97	37.39	21	3.6	5.83333	2.7	23	10.6	16.2	138	3.9	2.1	21.8	53	49.9	2	4.1	40	58	1	471	0	1	3	1	0	0	0	0	1	0	0	1	0	10	67	43	13	4	1	1	1	1	1
31	2	26.5118	108	71	16	100	37.17	58	2.6	22.3077	20	130	8.9	18.5	131	4.9	5	24.3	135	52.8	2.2	21.1	55	132	6.3	491	0	1	3	1	0	0	0	1	1	0	0	1	0	18	97	38	9	6	0	0	1	0	0
67	2	29.3367	72	78	10	100	-17.78	49	4	12.25	4.3	37	9.8	15.7	136	3.6	2.3	15	204.822	45	1.4	5.4	35	57	3.6	191	1	1	3	1	0	0	0	0	0	0	0	1	0	10	54	31	15	9	1	1	1	1	1
66	2	27.102	92	103	28	100	36.06	33	3.8	8.68421	12.3	72	9.3	18	135	4.2	2.6	23.7	157	40.6	2.2	3.4	11	49	3	216	1	1	3	1	0	1	0	0	0	1	0	1	0	13	66	31	15	9	1	1	1	1	1
79	2	41.5781	79	68	20	100	36.83	24	3.3	7.27273	8.8	155	9.4	20.1	138	3.6	1.3	15.4	378	43.3	1.4	22.7	57	102	1.2	208	1	1	1	1	1	1	0	0	0	0	0	0	0	7	44	36	15	13	0	0	1	1	1
49	1	34.2798	95	96	20	100	36.78	6	2.2	2.72727	7.7	105	7.6	14.4	132	3.5	3.6	17	204.822	33.1	1.6	5.8	57	134	0.7	873	0	1	1	0	1	0	0	1	0	0	0	1	0	9	61	34	14	3	0	0	1	0	0
64	2	27.0306	93	98	20	98	37	23	2.3	10	5.8	121	9.5	17.1	141	6.1	4.7	15.5	157	38.7	1.4	2.4	229	473	1.2	1095	0	1	3	1	1	1	0	0	0	0	0	0	0	11	43	32	15	9	1	1	0	0	0
42	2	35.4308	78	70	8	97	35.83	35	2.8	12.5	8.3	62	7.7	20.3	126	3.6	1.2	23.5	134	56.8	2.3	16	16	49	2	221	0	1	3	1	0	0	1	0	0	0	0	1	1	9	57	31	15	5	0	0	1	0	0
71	2	24.3576	123	88	17	94	36.61	103	3.4	30.2941	8	109	9.8	19.8	133	4.6	1.6	12.9	204.822	30.9	1.2	0.4	22	65	3.8	275	1	1	3	1	0	1	1	0	1	1	1	1	0	11	62	41	8	13	0	0	0	1	1
59	2	37.167	78	73	26	96	37.22	62	4	15.5	16.2	110	8.9	14.6	132	3.9	2.3	28.6	117	62.9	2.6	3.1	26	83	2.9	224	1	0	0	1	0	1	0	0	0	0	0	1	0	7	50	17	15	6	0	0	0	1	1
61	1	30.4272	86	73	20	97	36.5	38	4.8	7.91667	5.1	57	8	19	139	3.8	2.4	26.2	69	60.3	2.5	11.4	21	39	1.1	255	0	1	2	0	1	1	0	0	1	1	0	1	1	7	83	37	15	8	0	0	1	1	1
47	2	20.1601	96	69	22	100	36.72	16	4.9	3.26531	21.9	206	6.9	15.3	134	4	3.5	16.3	325	29.9	1.5	1.5	9	17	0.6	112	0	1	3	1	0	0	1	1	1	0	0	1	0	5	66	29	15	6	1	0	1	1	1
60	2	30.8642	64	64	19	100	36.94	18	3.1	5.80645	4.9	96	9.8	14.1	131	4.6	6.6	16.1	144	39.8	1.5	1.1	498	869	1.4	4953	0	1	3	1	1	0	0	0	0	0	0	0	0	11	63	46	15	6	0	1	0	0	0
36	1	24.7281	118	71	42	95	36.67	35	2.2	15.9091	33.9	469	8.7	17.8	121	3.5	2.2	18.2	204.822	42.5	1.7	12.4	29	311	5.4	247	0	1	3	1	0	0	0	0	1	0	0	1	0	17	109	51	14	5	0	0	0	1	0
75	2	18.7429	70	74	30	96	34.78	58	2.9	20	21.3	129	11.1	22.9	147	4.5	4.1	20.1	180	40.2	1.9	45.8	192	262	0.5	409	1	1	2	1	0	0	0	1	0	0	0	1	1	9	78	27	9	8	0	0	1	1	1
50	1	24.093	114	28	14	100	36.72	17	1.9	8.94737	10.7	68	5.2	16	134	4.3	8	24.1	153	57.6	2.2	5.3	83	315	1.8	407	0	1	3	1	0	0	0	1	0	0	0	1	0	13	83	48	14	3	1	1	0	0	0
63	1	29.8487	93	61	17	100	36.44	12	3.3	3.63636	8.5	58	10.5	15.4	140	4.1	6.1	18.5	191	42.8	1.7	3.1	11	66	0.9	291	1	1	3	1	0	0	0	0	1	0	0	1	1	9	32	44	14	7	1	1	1	1	1
45	2	25.6941	89	112	18	100	38	9	3.6	2.5	7.6	100	10.2	15	143	3.2	0.8	10.3	204.822	25.8	1	1.4	32	102	0.7	232	0	1	2	1	0	0	0	0	1	0	0	1	0	4	19	26	15	1	0	1	0	0	0
68	2	40.1464	89	60	22	93	37.06	43	1.6	26.875	19	332	9.2	18.2	123	6.9	1.9	19.6	596	72.3	1.8	1.7	8	35	5.6	315	0	1	3	1	0	1	1	0	1	0	1	0	0	8	54	30	14	10	0	0	1	1	1
44	2	26.9939	59	94	18	98	36.83	14	2.6	5.38462	12.5	147	11.4	15.1	135	4.5	1.6	17.5	269	30.9	1.6	3.5	16	27	0.8	265	1	1	3	1	0	0	0	1	0	0	0	1	0	10	94	40	3	3	0	0	0	1	1
64	2	29.7619	72	81	17	94	37.06	12	3.1	3.87097	8	131	10.7	18.2	136	3.8	2.7	17.4	227	32.4	1.6	3.9	29	42	0.7	228	1	1	2	1	0	0	0	0	0	0	0	0	0	4	25	24	15	6	0	0	1	1	1
62	1	29.571	111	104	22	96	37.11	10	2.4	4.16667	24.4	181	9.7	25.5	138	3.8	3	15.8	232	72.3	1.5	4.1	293	259	0.6	482.686	1	1	2	1	0	0	0	0	0	0	0	1	0	11	63	49	7	5	0	0	0	1	1
53	1	21.9922	79	68	19	98	36.5	38	4.1	9.26829	6.4	105	7.1	26	128	3.3	3.5	16.1	204.822	31.7	1.5	15.5	69	121	0.3	883	0	1	3	1	0	1	1	0	0	1	0	1	0	8	49	17	15	9	0	0	1	1	0
55	2	24.4898	93	77	19	100	36.61	23	2.6	8.84615	10.1	90	5.9	22.7	135	5.2	6.1	35.6	129	49	3.3	13.5	21	44	1.2	176	1	1	3	1	0	0	0	0	0	0	1	1	0	16	90	43	15	7	1	1	1	1	1
58	1	30.1871	94	72	20	97	36.78	17	2.9	5.86207	7	45	9.6	16	143	4.6	4.3	27.2	132	38.7	2.5	3.6	4846	10540	1.1	2443	0	1	3	1	1	1	0	1	0	1	0	0	0	13	61	37	15	8	0	0	0	0	0
32	1	31.274	82	64	32	94	36.83	36	4	9	13.5	242	6.9	16.7	137	4.3	1.9	19.8	204.822	34.7	1.8	10.9	14	50	6	243	0	1	3	0	0	0	0	1	1	0	0	1	0	11	79	26	14	3	0	0	0	0	0
49	1	53.8194	49	117	25	91	36.83	25	3.6	6.94444	9.3	86	9.4	19.9	127	5.6	2.7	35.7	204.822	36.9	3.3	6.8	101	386	2.1	321	1	1	3	1	0	0	0	0	0	0	0	1	0	13	61	32	15	3	0	0	1	1	1
58	2	21.9052	123	67	35	95	36.28	31	2.8	11.0714	1.4	107	10.9	16.4	137	4.7	1.9	25	99	40.1	2.3	12.4	37	53	0.6	143	0	1	1	1	0	0	1	0	0	0	0	1	0	6	67	33	15	3	1	0	0	0	0
75	2	22.8374	102	84	16	99	37.22	31	2.9	10.6897	20.5	156	10.5	15.6	139	4.4	2	21.7	204.822	45.4	2	2.4	363	2647	1.1	546	0	1	2	1	1	0	0	1	0	1	0	1	0	4	37	42	15	8	0	0	0	1	0
43	2	30.1714	131	82	22	95	38	55	1.6	34.375	79.7	194	7.9	14.6	131	4.7	4.3	17.7	543	30.1	1.6	1.1	38	47	1	402	0	1	2	1	0	1	1	0	0	0	0	0	0	4	49	33	15	5	0	0	1	1	1
55	2	27.7069	89	100	34	97	37.22	16	2.2	7.27273	29	618	7.8	15.6	133	3.3	1.5	14.8	204.822	90.9	1.4	0.4	29	49	0.9	332	0	1	2	0	0	0	1	1	1	0	0	0	0	2	51	23	15	3	0	0	1	1	0
62	2	27.5911	78	122	12	100	37.06	13	1.4	9.28571	7.7	134	11.6	13.3	127	4	1	16.8	204.822	29.4	1.5	0.6	33	39	0.9	417	0	1	2	0	1	1	0	0	0	0	0	1	0	5	29	29	15	5	0	0	0	0	0
61	2	30.4469	110	111	26	94	36.61	76	3	25.3333	11.6	91	13.1	16	137	5.4	4.2	20.2	156	32.5	1.9	4.6	469	706	2	962	0	1	2	0	0	0	0	0	0	0	0	1	0	15	55	40	15	7	1	1	0	1	0
48	2	42.9239	90	8	17	99	36.78	14	2.2	6.36364	6.4	56	7.8	18.6	139	3.4	3.21904	24.4	129	43.1	2.2	11.6	45	106	0.6	331	0	1	2	0	0	0	0	0	0	0	0	0	0	8	80	38	13	4	1	1	1	0	0
53	1	26.3184	63	95	15	97	36.33	12	2.9	4.13793	12.6	138	13.4	19.9	140	4.6	2.5	25.7	61	37.4	2.4	14	225	191	0.6	369	0	1	2	1	0	0	0	1	0	1	0	0	0	7	47	22	12	2	0	1	0	0	0
53	2	25.4393	100	72	20	97	37	72	4.1	17.561	7.3	195	10	19.2	121	4.3	1.1	23.2	204.822	34.5	2.2	28.4	19	39	1.2	158	0	1	3	1	0	0	1	0	0	0	0	1	0	6	73	23	15	8	1	0	0	0	0
39	2	24.8016	93	65	25	100	36.83	32	3.1	10.3226	9	60	9	20.6	131	2.8	1.5	28.6	198	36	2.6	11.8	57	354	2.1	413	1	1	1	1	0	0	0	1	1	0	0	1	0	16	61	41	14	5	1	0	1	1	1
69	1	20.3373	80	66	17	100	36.33	84	3.8	22.1053	26.8	201	10.8	14.6	128	3.5	4.3	20.5	252	61.8	1.9	3	6	23	4.5	482.686	0	1	3	1	1	0	0	0	1	0	0	1	0	13	101	42	10	7	0	0	0	0	0
60	1	36.947	96	97	20	93	37.17	16	1.5	10.6667	4.3	89	11.3	16	138	3.9	3.7	14	212	35	1.3	1.5	1956	2245	0.5	1037	0	1	2	1	1	0	0	1	0	0	0	0	0	11	50	35	15	9	1	1	0	1	0
54	1	36.5714	58	59	17	98	36.28	126	3.3	38.1818	19.9	107	11.2	24.4	139	4.2	1.1	22.3	224	121	2.1	47.1	33	87	5.4	462	0	1	3	1	1	0	0	1	0	0	0	1	0	12	55	19	15	4	1	0	1	1	1
46	1	29.6556	101	78	20	98	36.94	25	2.8	8.92857	6.1	81	5.4	22.8	129	3.5	2.3	21.2	104	42.4	2	12.1	22	47	5	322	0	1	3	1	0	0	0	1	1	0	0	0	1	11	76	30	15	5	1	1	1	0	0
56	1	46.5504	112	108	10	98	37	17	3.7	4.59459	4	58	9.5	17.6	140	4.2	3.4	20.9	210	48	1.9	8.9	19	96	0.8	383	1	1	3	1	1	0	0	1	1	0	1	1	0	7	48	32	14	5	0	0	0	1	1
73	2	35.5647	116	61	37	96	36.11	13	1.3	10	25.5	200	9.9	14.7	146	4.1	9.9	14.2	210	23.3	1.3	0.4	20	42	1.8	347	0	1	3	1	0	0	1	0	0	0	0	0	0	12	96	52	15	5	1	1	0	0	0
75	1	23.1363	109	65	38	99	36.61	10	2.4	4.16667	5.9	211	10.2	14.2	132	3.8	2.9	19.6	204.822	28.2	1.8	1.1	13	25	1.1	218	0	0	0	0	0	1	1	0	0	1	0	0	0	2	37	31	14	8	0	0	0	0	0
73	2	22.038	98	71	20	93	36.78	39	3.6	10.8333	22	116	8.8	19.7	139	4.5	3.9	20.2	197	46.1	1.9	2.1	32	55	0.7	357	0	1	1	1	0	0	0	0	1	0	0	1	0	10	73	30	7	6	0	0	0	1	0
54	2	30.5864	87	78	21	91	36.67	6	2.6	2.30769	9.5	133	8.1	17.1	137	3.6	1.6	18.5	204.822	44.7	1.7	1.6	10	29	0.5	179	0	1	3	1	0	0	0	1	1	0	1	1	0	7	42	37	14	5	0	0	0	1	0
52	1	26.3841	121	67	25	95	37	4	2.9	1.37931	13.5	366	7.2	16.9	131	2.5	3.1	12.3	166	29	1.1	19.6	44	104	0.4	320	0	1	1	1	0	0	0	1	1	0	0	1	1	8	56	34	15	4	0	0	0	0	0
32	2	37.301	105	83	24	93	36.72	96	3.7	25.9459	23.1	178	6.1	24.1	142	5.8	1.5	15.6	273	27.3	1.4	31.5	81	134	2.7	377	1	1	3	1	0	0	0	1	1	0	0	1	0	7	75	29	15	3	1	0	1	1	1
70	2	39.9524	95	64	16	98	37.67	10	2.4	4.16667	7.2	104	7.7	13.1	144	3.9	1.4	41.9	127	150	4.6	1.5	153	608	0.8	514	0	1	2	1	1	1	0	0	0	0	0	0	0	5	36	36	15	7	0	0	1	0	0
68	2	30.2225	99	86	17	99	36.83	14	2.5	5.6	3.3	165	8.5	17.3	132	3.8	1.6	14.4	204.822	76.4	1.3	1	21	28	0.4	221	1	1	3	0	0	0	0	0	1	0	0	1	0	4	51	36	15	11	1	1	0	1	1
56	1	21.9731	117	73	19	94	36.78	13	2.7	4.81481	3.2	82	10.4	27.1	141	3.2	4.7	36.8	116	44.6	3.4	33	66	148	0.8	467	0	1	3	1	0	1	0	0	1	0	0	1	0	18	116	47	3	6	0	1	0	0	0
61	2	28.4395	87	85	16	94	36.44	30	2	15	16.6	104	12.3	22.8	136	3.4	1.4	16.1	178	31.9	1.5	1.9	22	41	1.2	180	0	1	3	1	0	0	0	0	0	1	0	1	0	7	49	40	15	6	1	0	1	0	0
54	1	28.0624	91	79	18	100	36.5	30	3.3	9.09091	11.9	91	7.8	16.2	120	3.5	1.7	43.1	70	96.3	3.9	21.6	300	336	1.6	194	0	1	3	1	1	0	0	0	0	1	0	1	0	15	81	49	14	4	1	1	1	1	1
51	2	27.845	116	100	28	99	36.72	8	2.2	3.63636	12.4	58	7.2	22.3	139	3.8	0.9	24.2	159	42.7	2.2	7	18	90	0.9	214	1	1	3	1	1	0	0	1	1	0	0	1	0	11	90	51	6	4	0	0	1	1	1
68	1	35.6122	85	69	24	100	36.56	26	2.1	12.381	17	135	9.1	14.9	139	4.1	1.5	18.6	204.822	29.2	1.7	1.6	25	34	0.7	276	1	1	3	1	0	0	0	0	0	0	0	1	0	3	42	31	15	6	1	0	1	1	1
74	2	27.0993	84	103	23	100	36.94	85	3.2	26.5625	10.3	82	8.6	14.1	137	5	1	13.5	784	57.7	1.2	0.2	19	40	6.8	436	0	1	2	1	0	1	1	0	0	0	0	1	0	11	35	24	12	11	0	0	0	0	0
55	2	31.3408	79	106	35	98	36.33	59	2.9	20.3448	7.3	44	8.2	17.2	129	4	1.3	17.3	204.822	29.9	1.6	3.1	458	1421	4.9	1512	0	1	3	1	0	0	0	1	1	0	0	1	0	11	60	36	15	4	0	0	0	1	0
64	1	30.5414	102	73	21	95	37	64	3.6	17.7778	22.9	119	8.9	22.9	133	3.8	2.5	49.2	93	101.5	4.5	3.8	132	462	3.9	399	1	1	3	1	0	0	1	0	0	0	0	1	0	13	93	35	10	6	1	1	1	1	1
70	1	29.3023	80	76	16	98	36.56	41	5.2	7.88462	8.1	124	7	21.3	144	4.7	7.4	28	52	54.9	2.7	8.5	20	57	4.6	233	0	1	3	1	0	1	0	0	1	1	0	1	1	11	73	36	15	8	1	0	1	1	1
55	2	14.5266	136	62	24	94	37	13	2.8	4.64286	4.8	99	8.1	17.3	121	3.8	0.7	22.5	119	150	2.1	7.7	70	151	0.7	182	0	1	2	1	0	1	0	0	1	0	0	0	0	6	68	41	15	12	1	0	1	1	1
62	1	38.2618	78	68	15	98	36.39	44	3.6	12.2222	9.5	59	6.9	31.1	123	5.4	2.1	24.3	204.822	69.6	2.2	23.6	100	128	1.4	420	1	1	3	0	0	1	0	0	0	0	0	1	0	9	59	38	13	8	0	0	1	1	1
63	2	22.3569	82	68	20	100	36.5	59	2.4	24.5833	18.8	152	7.7	17.2	132	5.8	3.2	23.2	148	39.1	2.1	2.5	27	70	2.9	280	0	1	3	1	1	0	0	0	1	1	0	1	0	11	85	44	15	6	0	0	1	1	1
56	2	37.7163	93	114	19	100	37.22	10	2.1	4.7619	11.2	272	9.5	17.2	150	3.3	0.9	16.7	868	32.5	1.5	0.8	75	93	0.6	339	0	1	1	1	1	0	0	0	1	0	0	1	0	4	47	35	15	2	0	0	0	0	0
63	2	23.3642	109	88	15	96	36.72	40	3	13.3333	4	92	10.6	16.5	142	3.9	3.21904	21.1	243	50	2	0.9	63	48	1.9	235	1	1	1	1	0	0	0	0	1	0	0	1	0	7	58	30	7	8	1	0	1	1	1
59	1	27.3644	99	74	22	100	37.33	19	2.6	7.30769	22.3	232	7.4	18.1	135	3.9	1.4	15.7	88	23.2	1.5	0.8	37	74	0.7	261	0	1	2	1	1	0	0	0	0	0	0	1	0	14	105	48	3	4	1	0	1	0	0
50	2	32.6318	81	100	16	100	35.67	36	3.3	10.9091	3.7	85	10.5	18.9	142	3.6	3.21904	17.4	241	40.3	1.6	6	347	440	1.9	278	0	1	2	1	1	0	0	0	0	0	0	1	0	9	54	27	14	5	0	1	0	0	0
58	1	27.3333	88	56	23	92	36.78	28	2.8	10	7.2	22	7	21.1	128	3.6	1.5	21.3	86	150	2	17.6	15	35	1.4	303	0	1	3	1	0	0	1	0	0	0	0	1	0	13	65	27	14	5	0	1	1	0	0
68	2	26.1111	61	80	8	100	2.78	35	2.2	15.9091	3.5	72	9.9	19.6	139	5	3.3	25.7	115	62.4	2.4	5.4	235	760	1.3	204	1	1	2	1	0	1	0	0	0	0	0	1	0	11	51	30	14	6	1	1	1	1	1
64	2	32.0759	76	88	23	99	36.56	40	2.9	13.7931	11.2	157	10.6	14.6	139	4.6	1.8	15.2	204.822	30.4	1.4	0.4	9	20	2.1	352	1	1	3	1	0	1	1	0	0	0	0	1	0	5	81	46	14	10	0	0	1	1	1
54	2	37.2024	78	90	22	99	37.39	51	3.3	15.4545	10.3	188	8.8	16.7	147	3.3	0.9	19.9	283	37.6	1.9	2	15	63	2.3	316	1	1	1	1	0	1	0	0	1	0	0	1	1	8	48	36	15	5	1	0	0	1	1
60	1	41.9855	114	65	24	91	36.83	65	3.2	20.3125	31.2	114	7.9	16.9	149	4.1	1.9	28.5	186	39.9	2.6	17.3	92	90	3.9	256	0	1	3	1	0	0	0	1	1	0	0	1	0	10	78	29	13	5	0	0	1	1	1
59	1	16.9005	75	123	14	100	37.39	31	3	10.3333	12.5	118	10.4	15.4	143	5.2	5.2	19.6	188	30.3	1.8	2.4	32	55	0.7	279	1	0	0	1	0	0	0	1	0	0	0	0	0	10	27	34	15	5	0	1	1	1	1
38	2	34.8639	105	95	33	97	36.67	5	3.8	1.31579	8.4	87	7.8	19.9	144	3.8	2.5	27.7	153	34.4	2.5	10	48	95	0.4	434	1	0	0	0	1	0	0	0	1	0	0	1	0	6	43	25	14	3	0	0	0	1	1
73	1	24.8016	81	80	16	100	36.56	17	3	5.66667	6.4	380	11.3	13.5	141	4.2	0.6	14.9	204.822	31.2	1.3	0.1	5	9	0.7	100	0	0	0	1	0	0	0	0	0	0	0	0	0	3	39	29	11	8	0	0	0	1	0
62	2	27.0692	88	65	15	97	36.11	46	3.7	12.4324	12	22	8	19.2	134	3.4	7.9	23.4	114	51.1	2.2	6	26	44	5.2	273	1	1	3	1	0	0	0	0	0	0	0	1	0	13	57	25	14	6	0	0	1	1	1
73	1	64.7676	105	79	15	93	36.83	24	2.8	8.57143	5.1	40	12.7	13.9	138	3.7	3.21904	16.9	204.822	27.8	1.6	2.8	33	47	0.9	482.686	0	1	1	0	0	0	0	1	0	0	0	0	0	10	47	34	13	6	0	0	1	0	0
59	2	36.352	84	69	25	97	37.56	35	1.7	20.5882	21.9	197	8.7	15.8	134	4.1	2.8	18	209	39.8	1.7	1.4	13	26	1.7	192	0	0	0	1	0	0	0	0	1	1	0	0	1	4	60	31	14	7	0	0	1	1	1
61	2	24.589	82	65	20	99	36.5	49	3.3	14.8485	8.5	96	7	19.3	129	4.3	2.4	28.3	80	80	2.6	14.6	12	28	1.5	217	0	1	3	1	0	0	0	0	0	0	0	1	0	10	85	33	15	3	1	0	0	0	0
61	2	30.0735	91	55	26	100	37.33	41	2.7	15.1852	11.3	55	7.2	15.8	135	4.1	2	18.2	178	34.1	1.7	2.4	15	30	1.3	239	1	1	1	1	1	0	0	0	0	1	0	1	0	6	56	42	15	7	0	1	1	1	1
78	2	25.1384	96	52	22	97	37.06	24	3.6	6.66667	7.4	116	7.6	17	138	4.4	2.9	21.6	277	37.6	2	1.8	11	16	0.8	482.686	0	1	2	1	1	1	0	1	0	1	0	1	0	3	62	36	15	7	0	0	1	0	0
45	1	24.7877	82	70	18	100	36.17	87	3.6	24.1667	9.4	43	9.9	19.7	138	3.7	1.5	23	247	54.6	2.2	43.7	40	81	7.8	312	0	1	3	1	0	0	0	0	1	0	0	1	1	16	80	36	15	6	0	1	0	0	0
71	2	23.4429	79	93	11	95	35.83	10	2.5	4	15.5	182	11.6	16.6	122	4.5	1.1	29.4	235	36.8	2.7	12.4	87	110	0.4	235	0	0	0	1	0	0	0	0	0	1	0	1	0	4	46	24	15	6	0	0	1	0	0
64	2	35.1666	119	65	23	92	36.5	15	3.6	4.16667	6.4	150	11.4	14.3	146	3.9	6.5	20	204.822	40	2	3.6	938	1686	1.1	8600	0	1	3	1	1	1	0	0	0	0	0	0	0	10	71	37	15	6	0	1	0	1	0
76	2	41.5741	144	71	33	100	38.5	59	2.8	21.0714	15.2	367	7.6	17.8	146	4.1	1	17	204.822	29.5	1.5	0.4	15	22	2.4	207	0	1	3	1	0	1	1	0	1	0	0	0	0	10	66	50	12	9	0	0	1	1	1
48	1	23.3489	89	69	14	95	37.11	33	3.4	9.70588	12.5	67	7.6	16.6	132	4	3.4	42.7	201	76.8	4	5.9	18	27	0.7	211	1	1	2	1	0	0	0	0	1	0	0	1	1	7	59	28	14	3	1	0	1	1	1
62	1	19.9533	133	138	31	100	36.67	3	1.5	2	20.9	149	9.6	16.5	133	3.2	3.3	20.3	320	66.3	1.9	0.4	49	112	0.4	436	0	1	2	1	0	0	0	1	0	0	0	1	0	7	68	41	13	3	0	0	1	1	1
61	2	20.8235	65	74	18	93	36.44	35	2.4	14.5833	9.6	230	9	19	136	3.9	1.1	23.4	204.822	40.8	2.2	0.7	29	38	1.4	292	0	1	1	0	0	0	1	0	0	0	0	0	0	4	40	23	15	5	0	0	0	0	0
69	2	28.5121	93	79	25	100	36.94	17	2.8	6.07143	6.4	39	11.4	14.3	139	4.4	2.4	16.5	232	32	1.5	4.7	49	74	0.5	403	1	1	3	1	1	1	0	1	1	0	0	1	0	8	78	41	15	7	1	1	1	1	1
61	2	25.8291	103	75	30	99	36.72	5	3.1	1.6129	13.4	326	8.5	14.9	130	3.3	3.21904	16.2	204.822	29.4	1.5	7.7	80	63	0.5	151	0	0	0	0	1	0	0	0	1	1	0	0	0	3	26	19	15	9	0	0	1	0	0
55	1	33.698	112	80	25	93	36.61	36	3.4	10.5882	9.9	152	8.7	18.1	136	4.4	1.3	16.5	225	29.4	1.5	1.1	14	26	1.6	273	1	1	3	1	0	0	0	0	1	0	0	1	0	3	41	28	15	4	0	1	1	1	1
68	2	26.9983	94	77	31	100	36.5	45	2.4	18.75	20.8	91	6.1	23.1	142	3.4	7.8	23.1	81	52.8	2.1	10.5	32	58	2	216	0	1	3	1	1	1	1	1	1	0	0	1	0	19	125	50	8	10	1	1	1	1	1
61	2	53.1183	126	99	16	98	36.5	5	3.2	1.5625	9.6	196	13.4	15.2	128	4.8	1.4	13.2	204.822	33	1.2	2	14	24	0.9	198	1	1	3	0	0	0	1	1	0	0	1	1	0	6	43	38	13	7	0	0	0	1	1
49	1	25.3076	102	48	18	100	37.17	7	2.4	2.91667	5.2	163	8	15.9	147	3.3	3.1	13.3	186	31.3	1.2	0.7	23	53	0.7	252	0	1	2	1	0	0	0	1	1	0	0	0	0	5	40	33	15	2	1	1	0	0	0
75	2	31.5747	110	78	10	99	36.67	45	3.3	13.6364	14.1	273	9.8	18.6	132	5	4.3	33.6	272	28.2	3.1	1.7	371	1120	4.5	1166	0	1	3	1	0	1	1	0	0	1	0	0	0	8	79	26	13	10	0	0	1	1	1
58	1	20.6385	68	67	15	100	36.72	22	3.2	6.875	5.3	83	8.4	18	134	4.2	1	17.7	220	44.2	1.6	3.8	41	89	1.2	150	1	0	0	0	0	0	0	1	1	1	0	1	0	8	56	29	15	6	0	0	0	1	1
64	2	21.2939	91	93	23	97	37.06	33	3.2	10.3125	7.2	468	7.9	15.1	138	3.8	0.8	11.4	204.822	31.8	1	0.2	13	33	1.3	292	0	0	0	1	0	0	1	0	1	0	0	1	0	3	42	25	10	8	0	0	0	0	0
67	1	32.5368	77	91	17	100	35.83	36	3.1	11.6129	9.3	177	8.3	16	139	5	3.21904	16.4	204.822	39.8	1.5	3.5	19	57	3.3	271	0	1	3	0	0	1	0	0	0	0	0	1	1	7	69	33	14	10	0	0	0	0	0
53	2	32.4192	121	87	11	100	37.33	24	3.7	6.48649	11.2	195	9.6	14.1	135	4.2	1.9	24.1	173	46.5	2.2	2.7	15	39	1.4	110	1	1	3	1	0	0	0	0	0	0	0	1	0	9	55	34	15	5	0	0	0	1	1
32	2	44.4922	95	61	24	97	37.44	31	3.2	9.6875	7.3	126	13.1	15.9	133	3.9	2	15.8	533	42.3	1.4	34.5	29	131	3.6	283	0	1	3	1	0	0	0	0	1	0	0	1	1	16	112	42	15	3	0	1	0	0	0
67	2	25.477	85	106	12	100	37	13	2.5	5.2	15.7	52	9.4	13.8	139	4.9	9	17.7	174	36.7	1.6	2.1	329	467	1.3	411	0	1	1	1	0	0	0	1	0	0	0	1	0	11	36	33	15	5	1	1	0	1	0
39	1	20.635	84	64	14	100	36.56	20	2.2	9.09091	9.6	128	5.9	25.7	135	2.6	2.4	29.9	92	46.9	2.7	12.4	18	118	2.1	307	1	1	3	1	0	0	0	1	0	0	0	1	0	11	80	31	11	3	0	0	1	1	1
52	2	41.3264	82	68	26	94	37.83	9	2.6	3.46154	10	119	15.9	14.5	145	4	2.1	16.3	412	31.6	1.5	6.9	54	306	0.5	457	0	1	3	1	0	0	0	0	1	1	0	1	0	11	38	34	15	4	0	0	0	1	0
71	2	29.481	109	72	26	100	37	16	2.1	7.61905	14.3	127	10.3	17.3	133	5.7	2.4	20.4	103	32.2	1.9	8.9	34	102	1.5	258	0	1	3	1	0	0	0	1	1	0	0	0	0	6	64	33	15	6	0	0	1	1	1
43	1	21.0813	78	70	15	96	37.78	23	2.2	10.4545	3.1	13	7.7	19.5	135	3.4	1.1	20.2	109	45.9	1.8	6.9	23	63	1.9	159	0	1	3	1	0	0	0	1	1	0	0	1	0	16	63	36	15	7	1	1	0	0	0
62	2	21.3891	80	99	11	100	37.17	26	2.1	12.381	16.8	74	10.5	16	135	5.6	3.2	21.5	156	41.1	2	2.1	895	1454	4.2	153	0	1	3	1	0	0	0	0	0	1	0	1	0	10	71	38	15	8	0	0	0	0	0
47	2	24.8016	126	121	31	95	37.5	29	2.5	11.6	11.8	74	8.3	18.6	142	3.9	3.21904	30.6	204.822	28.8	2.8	27.9	133	134	1.4	292	0	0	0	0	1	0	0	1	1	0	0	1	0	8	46	29	14	4	0	0	0	1	0
57	2	25.3266	111	69	25	92	37	73	3.1	23.5484	28.6	154	7.5	17.7	140	4.9	1.6	22.9	271	42	2.1	40.7	36	113	2.1	360	1	1	3	1	1	0	0	1	1	1	0	1	0	15	84	37	14	4	1	0	1	1	1
48	1	37.4656	114	61	14	99	36.22	34	3.2	10.625	35.5	124	8.1	21.2	140	4	2	35.5	62	73.3	3.3	2.4	33	44	3.8	277	0	1	3	1	0	0	0	1	0	0	0	1	1	13	82	31	11	5	1	0	1	0	0
27	1	33.2986	83	77	21	94	36.67	28	3.9	7.17949	3.7	41	6.8	26.2	133	3.4	4.4	28.6	91	38.9	2.6	31.9	137	164	0.4	300	1	1	1	1	0	0	0	1	0	0	0	1	0	10	50	22	13	3	0	0	1	1	1
60	2	34.7222	96	99	25	100	36.89	51	3.8	13.4211	8.5	104	7.2	19.9	130	4.4	2.7	29.6	115	48.7	2.7	5.5	18	29	2.2	206	1	1	2	1	0	0	0	1	0	0	0	1	0	9	54	35	14	6	0	0	1	1	1
72	2	22.9592	82	65	12	98	36.94	24	2.4	10	5.1	61	7.3	15.9	140	4.3	1.4	20.5	156	34.4	1.9	1.4	18	29	1.9	157	1	1	1	0	0	0	0	1	1	0	0	1	0	12	50	28	14	10	1	1	1	1	1
55	2	21.0373	79	92	15	96	36.78	8	3.2	2.5	5	63	10.6	18.1	140	3.5	2.1	17.6	156	33.2	1.6	4	69	211	0.6	577	0	1	3	1	1	0	0	1	1	0	0	1	0	7	48	27	9	2	1	1	1	0	0
48	2	23.0546	121	116	24	100	36.94	15	2.7	5.55556	1.7	52	13.5	13.3	137	4	4.9	15.4	116	42.7	1.4	1	759	6983	1.4	2266	0	1	3	1	0	0	0	0	0	0	0	0	0	16	96	46	15	3	1	1	1	0	0
47	1	19.0027	128	92	38	98	37	60	3.7	16.2162	17.2	61	7.2	17.7	133	4.9	1.1	25.6	144	47.8	2.4	13.6	26	61	0.4	363	0	1	3	0	0	0	1	0	1	0	0	1	0	16	73	44	13	4	1	1	1	1	1
70	2	22.8571	89	77	22	100	36.61	40	3.6	11.1111	5.4	93	8.1	17.5	146	3.4	1.4	20.3	264	32.4	1.9	8.8	304	486	1.6	319	0	1	1	1	0	0	0	0	0	1	0	0	0	11	60	31	15	4	0	0	1	0	0
60	2	23.8367	74	108	9	100	36.89	52	2.5	20.8	9.6	137	8.1	16.3	148	3.5	1.5	22.8	118	67.9	2.2	3.8	597	1966	2.5	238	1	0	0	0	0	0	0	0	0	0	0	1	1	8	52	29	15	7	0	1	1	1	1
55	2	31.349	122	91	27	99	35.56	30	2.4	12.5	12.7	246	10.6	16.6	135	4.9	2.5	18.7	204.822	35.3	1.7	1.1	4	25	1.7	229	0	1	3	1	0	0	0	0	1	0	0	1	0	4	57	35	14	3	1	0	1	1	1
61	1	25.6519	94	78	24	97	37.83	45	3.9	11.5385	14.1	95	8.8	18.4	140	3.4	2.2	22.8	75	57	2.2	3.4	12	14	4.2	184	0	1	3	0	0	1	1	0	0	0	0	0	0	9	62	34	13	7	0	0	0	1	0
63	2	19.6287	60	74	14	97	35.11	47	3.2	14.6875	4.9	47	8.8	17.9	143	3.7	1.5	25.7	228	44.4	2.5	1.3	22	39	2.2	308	1	1	2	1	0	1	0	0	1	0	0	1	0	11	105	46	3	7	1	1	1	1	1
64	1	23.3844	119	43	17	94	37.22	59	2.5	23.6	12.8	333	8.7	20.2	132	4.3	1.5	47.7	388	42.7	5.2	0.6	17	31	3.4	183	0	1	1	1	0	0	0	0	1	0	0	0	0	6	64	42	10	8	1	0	1	0	0
56	2	40.7455	76	78	18	95	36.78	13	2.4	5.41667	7.2	108	11.9	13.6	111	4.7	3.3	28.6	204.822	51.6	2.8	15	88	166	0.5	241	0	1	2	1	1	0	0	1	1	0	0	1	1	6	51	24	15	5	0	0	0	1	0
48	1	27.6584	149	123	36	98	39.28	27	1.9	14.2105	6.6	24	13.1	13.5	138	2.8	4.3	20	295	35.1	1.9	2.7	19	45	1.5	290	0	1	3	1	0	0	0	0	1	0	0	0	0	16	100	49	15	3	1	1	0	0	0
38	2	44.82	86	65	27	100	36.89	66	3.4	19.4118	17.7	34	8.3	22.5	140	5.3	2.4	38.1	74	65.3	3.5	20	19	30	3.6	290	1	1	3	1	0	0	0	1	1	0	0	1	0	13	107	39	14	3	0	0	1	1	1
47	1	25.6015	99	84	21	96	36.5	27	2.5	10.8	9.1	37	10.5	24.7	128	3.3	2.3	24.1	112	50.4	2.3	37.3	18	75	0.8	221	0	1	3	1	0	0	0	0	0	0	0	1	1	10	62	35	14	3	1	1	0	0	0
58	2	22.8647	99	122	26	97	37.33	32	3.6	8.88889	11.2	50	9.5	14.9	140	4.6	3.9	19	173	32.7	1.7	5	259	474	1.9	181	0	1	3	1	0	0	0	0	0	0	0	1	0	10	55	30	15	6	0	0	0	0	0
46	2	30.5414	78	50	19	87	36.72	40	2.6	15.3846	3.8	114	11	15.5	125	5	3	20	100	40	2	0.3	33	35	3	251	0	1	3	1	0	0	1	0	1	0	0	1	1	7	74	36	14	4	1	0	0	1	0
56	1	25.9325	90	49	19	97	36.83	60	4	15	10.8	111	9.4	15.7	128	4.9	1.9	28.1	112	150	2.6	10.5	23	131	4.1	194	0	1	3	1	0	0	1	1	0	0	0	1	1	11	86	42	14	7	0	0	0	0	0
64	2	59.4136	103	68	17	92	36.44	53	1.8	29.4444	16.8	115	12.1	20.3	134	5.2	2.5	18.3	204.822	76	1.7	8.4	22	64	1.5	375	0	1	3	1	1	0	0	0	1	1	0	1	0	9	80	27	13	6	0	0	0	0	0
56	1	24.8016	95	104	24	93	36.83	27	4	6.75	19.6	205	12.1	14.3	149	3.3	2.8	11.7	204.822	24.9	1.1	1.1	46	89	0.8	597	0	1	1	1	1	1	0	0	1	0	0	0	0	3	54	35	7	5	0	0	0	0	0
73	1	26.6948	86	69	24	95	36.44	64	3.6	17.7778	17.1	202	13.7	16.9	122	6.1	5	19.4	275	45	1.8	3	32	54	1.6	218	1	1	2	0	1	1	0	1	1	0	0	1	1	9	57	36	15	8	1	0	1	1	1
59	2	40.6746	82	76	19	94	36.78	32	2.2	14.5455	9.8	44	6.4	18	133	4.7	1.9	23	142	53.5	2.1	3.8	13	34	2.3	319	1	1	3	0	0	1	1	1	0	1	0	1	0	10	68	33	15	9	0	0	1	1	1
43	1	32.8167	93	72	20	98	36.94	20	3.7	5.40541	16.8	252	7.4	16.1	137	4	3.2	17.8	302	36.2	1.6	0.5	72	174	1.3	383	0	1	3	1	0	0	1	0	0	0	0	1	0	8	41	30	13	5	0	0	0	0	0
33	2	27.2	137	113	30	98	37.39	18	2.5	7.2	26.3	147	10.2	16.3	124	3.9	3.6	21.7	450	26.4	2	4.9	27	56	0.7	295	1	1	3	1	0	1	0	1	0	0	0	1	0	11	70	42	13	4	1	0	1	1	1
67	2	20.5677	106	105	20	97	36.72	38	3.6	10.5556	5.2	124	7.1	12.6	138	4.1	0.7	17.1	204.822	43.4	1.6	18	53	89	1.7	482.686	0	1	1	1	0	0	0	0	1	0	0	1	0	5	51	29	8	4	0	0	0	0	0
68	2	40.7455	0	72	0	96	36.28	23	3.6	6.38889	4.1	186	10.9	20.6	135	4.1	1	27.8	499	126.4	2.6	0.4	9	19	3.2	139	0	1	3	1	0	1	1	0	0	0	0	1	0	11	86	39	9	11	0	0	1	1	1
59	2	35.2932	92	80	20	100	37.44	11	2.4	4.58333	6.6	70	8.3	14	143	5.5	9	17.5	130	71.2	1.6	1.7	599	825	0.9	3845	0	1	2	1	1	1	0	0	0	1	0	1	0	15	106	41	3	6	1	1	1	0	0
53	1	26.8352	102	78	17	100	36.39	12	2.5	4.8	6.2	55	7.9	16.7	141	3.8	3.6	20.1	180	43.8	1.8	8	440	890	0.6	1815	1	1	3	1	0	0	0	0	0	0	0	1	0	10	53	31	15	4	0	1	0	1	1
49	2	19.8207	92	69	12	96	37.44	14	2.5	5.6	4.4	179	7.1	17.9	133	4	2.5	19.5	204.822	32.8	1.8	8.2	69	81	0.8	173	0	0	0	1	0	0	0	0	0	0	0	0	0	4	42	34	15	9	1	0	0	0	0
59	1	27.3778	83	77	11	100	36.78	18	3.1	5.80645	6.1	34	7.9	18.6	128	3.8	2	38.2	33	150	3.5	6.7	677	1240	1.4	215	1	1	3	1	1	0	0	0	0	0	0	1	0	11	88	44	15	6	0	0	1	1	1
53	1	34.6487	76	113	21	100	36.5	17	3.7	4.59459	10.3	46	8.6	18.9	140	3.2	1.4	32.2	79	49.9	3	7.8	10	33	1.6	165	0	1	2	1	0	0	0	1	0	0	0	1	0	12	35	29	15	4	0	0	1	1	1
69	2	25.5363	98	68	15	100	37.56	17	2.4	7.08333	10.4	68	9.7	16.4	134	5.5	1.4	20.2	117	39.1	1.9	4	548	891	1.2	1277	0	1	2	1	1	1	0	1	0	0	0	1	0	9	61	35	15	8	0	1	0	1	0
69	2	23.1994	121	72	17	100	37.44	17	2.6	6.53846	4.8	61	8.3	17.5	135	5.3	2.4	24.9	186	38.8	2.3	6.3	766	1420	0.7	1890	0	1	1	1	1	0	0	0	0	0	0	1	0	8	69	19	15	5	0	0	1	0	0
68	1	31.7663	108	91	16	100	37.5	41	2.8	14.6429	21.6	203	8.5	16.9	142	4.2	3.6	17.9	176	30.3	1.6	1.2	100	151	0.7	381	1	1	2	1	0	0	0	0	0	0	0	0	0	9	64	41	6	5	1	0	0	1	1
75	2	23.0655	101	72	20	94	36.44	37	2.2	16.8182	15.6	81	7.6	23.7	135	4.7	6.2	19.8	42	41	1.8	2	5	17	1.3	437	1	1	2	1	0	0	1	0	0	0	0	1	0	6	41	23	15	8	0	0	1	1	1
53	1	25.2174	80	88	20	100	37.56	7	2.1	3.33333	19.2	227	10.2	16.1	140	4	6.3	20.9	293	31.6	1.9	8.8	315	459	0.5	420	0	1	3	1	0	0	0	0	0	0	0	0	0	9	43	22	15	4	1	1	0	1	0
68	2	37.5567	70	57	17	94	37.06	77	2.2	35	22.2	258	7.2	16.4	136	4.5	0.9	16.5	629	28.8	1.5	3.9	47	75	3.5	499	0	1	2	1	0	0	1	0	0	0	0	1	0	8	54	19	15	4	0	0	0	0	0
76	2	35.0531	167	75	18	100	36.89	57	3.5	16.2857	13.9	169	8	17.9	138	3.8	2.4	18.1	83	39	1.7	1.5	14	31	3.1	219	0	1	3	1	0	1	0	0	0	0	1	1	0	6	80	36	15	8	0	0	1	1	1
63	2	47.8316	102	71	17	94	36.17	78	3.3	23.6364	19.4	96	8	17.9	131	4.6	2.9	42.1	104	40	4.5	23.6	17	41	3.9	213	1	1	3	1	0	1	0	0	0	0	0	1	1	11	82	33	15	9	1	1	1	1	1
29	1	27.8307	94	65	24	98	36.61	7	4.5	1.55556	9.7	102	11.5	19	130	3	2.2	33.2	75	52	3.1	6.6	16	44	1.2	338	1	1	3	1	0	0	0	0	1	0	0	1	1	11	68	34	12	3	1	1	1	1	0
58	2	19.6629	76	59	17	98	36.83	29	3	9.66667	6.5	41	7.7	26.3	143	3.5	4.2	42.2	57	51.8	3.8	19.5	42	77	0.9	348	0	1	2	1	1	1	0	0	0	0	0	0	0	10	72	27	10	7	0	1	1	1	1
65	2	25.5102	100	100	20	95	37.56	25	2.5	10	13.2	156	9.3	16.2	131	3.9	2	20	204.822	40	2	0.9	19	57	1.7	303	0	1	1	1	1	0	0	1	0	0	1	1	0	2	41	25	15	10	0	0	0	1	0
73	2	26.768	91	70	38	100	36.72	61	3.2	19.0625	7.7	150	8.2	16.8	139	4.3	1.4	13.2	342	28.4	1.2	0.7	36	98	2.8	431	0	1	2	1	0	0	1	0	1	1	1	1	0	8	51	33	14	8	0	0	1	0	0
71	2	45.7644	98	94	22	97	36.67	37	3.3	11.2121	3.6	118	7.6	17.5	140	3.2	1.3	12.7	293	31.6	1.2	0.9	32	30	1.4	262	0	1	3	1	0	1	1	1	1	1	0	0	0	8	33	30	15	6	0	0	1	1	1
44	2	38.2212	102	100	22	93	36.94	28	4.1	6.82927	9.4	159	6.8	18.6	130	3.7	1.7	24.3	142	56.4	2.3	26.5	142	228	1.4	256	0	1	3	1	0	0	0	1	0	0	0	1	0	16	128	52	3	3	0	0	1	1	1
70	1	37.0667	89	53	22	90	37.39	64	2.1	30.4762	8.5	77	8.2	18.7	136	4.8	1.5	20.4	204.822	34.8	1.9	1.9	40	80	2.4	589	0	1	3	1	0	1	0	0	1	0	0	1	0	13	78	54	15	4	0	0	1	1	1
71	2	19.0117	99	65	32	100	36.33	77	3.7	20.8108	2.7	160	7.3	17	136	6.3	3.2	21.4	468	34	2	2.3	25	49	2.2	180	0	1	3	1	0	0	1	0	1	0	0	1	0	9	66	45	14	12	0	0	1	1	1
64	1	26.148	77	75	23	100	37.22	27	2.5	10.8	3.6	68	8.1	18.3	137	4.4	3.2	12.3	204.822	33.2	1.1	3.5	1863	2527	0.7	360	0	1	1	1	1	0	0	0	0	0	1	1	1	9	40	35	14	8	0	1	1	0	0
43	2	41.1765	82	81	23	98	36.94	28	3.7	7.56757	7.2	279	11.6	15.3	131	4	1.2	23.1	287	33.6	2.1	0.6	40	37	1.4	354	0	1	2	0	0	0	1	0	0	0	0	0	0	3	24	17	15	5	0	0	1	0	0
69	2	33.7306	72	76	12	96	36.72	23	3.7	6.21622	1.4	73	7.7	18.2	140	3.5	1.2	27.5	159	62	2.6	3.8	19	61	2.1	283	0	1	3	1	0	0	0	0	0	0	0	1	1	10	86	50	15	10	1	1	1	0	0
74	1	22.4219	78	61	20	98	36.72	13	2.6	5	3.5	96	7.6	16.7	130	4.1	3.21904	20.3	154	34.3	1.9	1.8	14	20	0.5	184	1	0	0	0	0	0	0	0	0	0	0	1	0	8	31	22	14	6	0	0	1	1	1
72	2	24.5181	107	82	31	100	38.28	26	2.3	11.3043	20.7	240	11.1	13.5	134	4.7	2.5	12.8	333	30.5	1.2	2.1	27	24	1.5	278	0	1	2	1	0	0	1	0	1	0	0	1	0	11	73	49	15	9	0	0	1	1	1
51	1	22.8529	99	100	32	97	36.89	5	3.2	1.5625	5.7	181	9.2	13.6	141	3.9	3.21904	12.1	204.822	29.9	1.1	0.7	9	39	0.4	178	0	1	2	0	0	1	0	0	0	0	0	0	0	1	39	35	13	5	0	0	0	0	0
36	1	35.4427	77	51	16	95	37.17	92	2.9	31.7241	19.7	50	7.7	24.2	127	5.1	2.7	28.8	123	56.4	2.6	22.7	49	82	5.7	262	1	1	3	1	1	1	0	1	1	0	0	1	0	13	80	44	14	4	0	0	1	1	1
61	1	35.8312	81	72	20	96	37.78	27	3.8	7.10526	28.9	169	9.1	14	137	4.2	1.5	25.1	155	35.7	2.3	15.9	69	176	1.7	298	0	1	3	1	1	0	0	1	0	0	0	1	0	20	118	52	3	6	0	0	0	1	0
58	2	40.6746	71	83	14	97	37.17	11	3.3	3.33333	5.5	84	10.5	15.5	119	4.5	1	20.6	204.822	35.8	1.9	2.9	45	56	0.5	229	0	1	2	0	1	0	0	0	0	0	0	1	0	5	31	21	15	6	0	0	0	0	0
53	2	27.4316	95	101	16	100	37.06	19	2.9	6.55172	3.9	30	8.7	18.3	140	3.9	3.6	18.6	132	40	1.7	8.5	145	351	1	312	1	1	2	1	0	0	1	0	0	0	0	1	0	12	56	29	15	6	1	1	1	1	1
67	1	22.5502	74	91	15	100	36.28	24	2.3	10.4348	12.4	86	7	16.8	134	3.4	1.8	16.6	204.822	28.7	1.5	1.3	31	45	0.4	215	1	1	2	1	1	1	0	1	0	0	0	1	0	6	75	38	8	8	1	1	1	1	1
67	2	26.0417	95	77	16	100	35.17	76	4.2	18.0952	11.1	147	10.3	16.9	144	3.7	3.8	23.8	101	46.7	2.3	3.2	19	42	4.5	187	0	1	3	1	0	0	0	0	0	0	0	0	1	10	59	29	14	8	0	0	0	1	0
65	2	34.9003	87	69	32	97	37	111	2.7	41.1111	5.2	135	7.6	14.1	133	4.9	1.2	14.9	439	26.9	1.4	0.3	19	20	7.3	260	0	1	3	1	0	1	0	1	0	1	0	0	0	10	68	45	13	11	0	1	1	0	0
48	2	38.4206	110	100	25	94	37.67	22	2.5	8.8	22	83	11.1	16.2	133	4.7	1.8	23.4	165	34	2.1	10.4	1433	2812	0.9	482.686	0	1	2	0	0	0	0	0	0	0	0	1	0	11	64	26	15	3	0	0	0	0	0
69	2	30.6048	88	65	18	100	36.78	39	2.5	15.6	9.3	73	8.8	15.1	132	4.7	2.5	34.9	544	38.4	3.6	1.4	12	14	1.7	129	1	1	2	1	0	0	0	0	0	0	0	0	0	5	40	31	15	8	1	1	1	1	1
29	2	35.7612	110	106	33	94	36.67	87	4.5	19.3333	31.3	163	7.7	19.1	137	3.7	2.8	22.4	204.822	41.2	2	33.9	53	69	2.4	378	0	1	1	1	0	0	0	1	1	0	0	1	0	15	85	33	15	1	0	0	0	0	0
48	1	35.4308	129	115	21	95	36.83	19	2.5	7.6	12.3	229	11.7	19.2	130	4.2	4.4	14	210	40.8	1.3	9.8	154	300	3.4	514	0	1	3	1	1	0	0	1	0	0	0	0	1	11	82	43	14	3	0	0	0	0	0
55	2	22.1088	113	78	16	96	38.11	5	3	1.66667	9.4	93	11.9	12.7	137	3.2	0.8	13.1	596	52.6	1.2	0.8	80	79	0.5	193	0	0	0	1	0	1	0	0	0	0	0	1	0	3	30	28	14	5	0	0	1	0	0
67	2	28.3447	123	74	21	90	37	34	2.1	16.1905	20.6	64	12.1	20.2	134	3.9	10.7	29	389	150	2.6	19.9	168	175	1.9	390	0	1	3	1	0	1	0	1	0	0	0	1	0	10	90	33	15	8	0	0	1	1	0
57	1	30.1103	95	101	8	99	36.5	50	4.1	12.1951	5.9	84	6.7	23	152	4.2	3.2	53.6	91	58.1	5.9	25.6	33	82	1.8	416	1	1	3	1	0	1	0	1	0	0	0	0	0	10	78	28	9	8	1	0	1	1	1
67	2	25.0865	97	73	21	99	36	35	3.2	10.9375	13.6	57	7.2	21.2	146	4.8	4.5	27.7	59	61.6	2.5	3.9	9	19	2	136	1	1	3	1	1	0	0	0	1	0	0	1	0	16	109	52	3	5	0	0	1	1	1
72	1	40.3557	124	130	17	100	36.56	30	2.4	12.5	12.3	52	7.6	17.7	133	3.8	2.3	20	254	40	2	1.5	47	70	1	264	1	1	2	1	0	0	0	0	0	0	0	1	0	7	59	39	15	7	0	0	1	1	1
74	2	38.6196	105	64	26	99	36.72	65	2.4	27.0833	8.7	49	7.8	20.4	141	4.5	1	20	118	40	2	18	53	89	2.7	482.686	0	1	1	0	0	0	0	1	1	0	1	1	0	12	102	45	7	7	0	0	1	1	1
50	2	31.5617	108	82	16	100	36.33	11	2.8	3.92857	8.5	95	8.5	14.5	153	2.7	10.1	17.1	127	80.9	1.6	1.4	75	261	1	418	0	1	2	1	1	1	0	0	0	0	0	0	0	11	44	36	15	3	1	1	0	0	0
51	1	24.4473	94	62	16	96	36.56	55	3.3	16.6667	31.3	192	7.8	21.6	145	3.7	1.4	16.1	257	30.7	1.5	2.7	24	60	1.2	322	1	1	2	1	0	0	0	0	0	0	0	1	0	16	106	46	3	5	0	0	0	1	1
66	1	28.277	119	66	25	97	36.33	10	3.3	3.0303	9.1	63	8.8	17.6	139	3.4	2.2	16.4	144	35.4	1.5	2.1	12	28	1.5	267	0	1	3	1	0	0	0	0	1	0	0	0	0	11	86	50	3	9	1	1	1	1	1
70	2	32.3484	183	62	30	96	36.5	9	2.2	4.09091	4.3	272	9.4	17.3	133	3.5	1.1	15.8	255	46.9	1.4	0.6	7	14	0.6	140	0	1	3	0	0	0	0	1	0	0	1	0	0	1	51	35	15	9	0	0	0	1	0
80	2	24.5915	73	60	17	95	36.67	89	2	44.5	12.3	279	8	18.7	132	3	1	11.4	204.822	71.6	1.1	0.3	13	33	4	434	0	1	3	1	0	0	1	1	0	1	0	1	0	6	56	32	15	12	0	0	1	1	1
74	2	29.0179	70	62	17	99	36.83	37	2.5	14.8	12.7	265	8	20.1	135	4.7	1.1	49.1	295	40.8	4.6	0.8	66	171	2	339	0	0	0	1	0	1	1	0	1	0	0	1	0	5	41	17	15	9	0	0	0	0	0
69	2	24.5675	136	67	23	94	36.89	51	3.3	15.4545	8.8	185	9.5	17.6	141	4.7	6.5	34	122	57.9	3.1	4.2	6	14	1.6	100	1	1	3	1	1	1	0	0	0	0	0	1	0	13	121	58	4	4	0	0	1	1	1
73	2	24.6776	120	106	14	99	36.78	35	2.7	12.963	12.9	135	11.2	17	143	4	1.4	18.1	113	33.3	1.7	1.2	26	26	3.2	190	1	1	3	1	1	0	0	0	0	0	0	1	1	10	77	48	15	10	1	1	1	1	1
56	2	30.9399	96	75	19	97	35.89	26	2.3	11.3043	7.7	119	8.2	15.9	140	4.8	8.5	32.2	160	48	3.3	1.3	27	64	2	287	1	1	3	1	0	1	0	0	1	0	0	0	1	9	87	50	15	5	1	1	1	1	1
76	2	25.5811	99	54	23	95	36.22	72	2.3	31.3043	14.9	305	7.5	18.2	141	4.5	1.3	14.9	297	40.8	1.4	1.4	24	37	1.6	285	0	0	0	1	0	1	1	0	1	0	0	0	0	5	55	30	15	12	0	0	1	1	1
61	2	29.321	64	106	11	100	37.22	26	2.6	10	5.1	53	8.4	19	136	4.1	1.2	21.3	154	32.4	2	6	213	251	2.2	192	0	1	3	1	0	1	0	0	0	0	0	1	0	11	50	31	15	9	0	1	1	0	0
75	2	34.1908	105	73	20	99	36.56	77	2.4	32.0833	5.4	122	7.9	16.5	143	3.5	3.21904	10.4	204.822	34.8	1	0.3	52	56	5.4	482.686	0	1	2	0	0	0	1	0	1	0	0	0	0	6	39	19	15	9	0	0	1	0	0
54	1	30.1838	67	74	22	100	36.5	32	2.6	12.3077	8.2	79	7.2	26.7	138	3.4	1.7	23	204.822	35.8	2.1	3.9	53	123	7.9	239	0	1	3	1	0	0	0	1	0	0	0	1	0	12	41	31	13	6	0	0	1	1	1
61	2	22.3569	85	69	12	95	36.78	16	2.7	5.92593	8	100	9.6	17	137	3.3	1.8	17.4	204.822	43.2	1.6	4.4	14	34	0.5	167	1	1	2	0	0	0	0	1	0	0	0	1	0	4	63	26	15	6	1	0	1	1	1
52	1	32.9758	71	64	22	94	36.33	15	3.6	4.16667	10.8	48	8.4	21.2	137	4.4	1.7	23.5	69	42.3	2.2	24.2	64	126	1.1	186	1	1	3	1	0	0	0	0	0	0	0	1	0	11	45	21	13	4	0	1	1	1	1
50	1	25.8999	107	79	16	89	37.17	11	3.3	3.33333	30.4	50	9.5	19.4	135	3.2	4.4	32.2	152	81.6	2.9	27.7	60	89	2	475	0	1	3	1	0	0	0	1	1	0	0	1	0	13	54	20	15	4	1	0	0	1	0
52	1	26.7857	78	64	13	98	36.89	8	2.9	2.75862	13.9	318	9.8	16.4	138	3.3	0.8	20.7	593	36.6	1.9	16.9	32	62	0.6	186	0	0	0	1	0	0	0	0	0	0	0	1	0	6	50	31	14	3	0	0	0	0	0
45	1	23.1009	81	109	23	96	37.61	59	2.5	23.6	16.1	491	8.3	16.4	146	3.8	0.7	14.3	204.822	28.1	1.2	0.7	10	22	2.1	482.686	0	1	2	0	0	0	1	0	1	0	0	0	0	5	75	41	15	7	0	0	1	0	0
29	2	28.3801	108	99	16	93	36.94	27	2.3	11.7391	13.3	162	7.9	21.1	133	4.5	2	17.2	204.822	45.9	1.6	10.7	17	73	5.6	292	0	1	3	1	0	0	0	1	1	0	0	1	0	7	50	17	15	3	0	0	0	0	0
71	1	17.2656	130	93	24	94	37.5	13	4.1	3.17073	19.6	225	10.5	17.6	132	4.5	1.5	10.4	204.822	25.2	1	0.7	142	29	0.5	223	0	1	1	1	0	0	1	0	0	0	1	0	0	8	46	43	14	8	0	0	0	0	0
63	2	37.9012	79	80	17	97	37.94	12	2.9	4.13793	8.8	65	9	12.4	138	5.2	5.6	20.9	212	53.7	1.9	1.6	1813	4438	0.8	12165	0	1	3	1	0	0	0	1	1	0	0	0	0	11	59	43	15	7	1	1	1	0	0
55	2	32	112	88	17	99	37.22	17	3.9	4.35897	5.1	54	8.7	17.9	128	4.1	2.5	27.7	204.822	46.4	2.7	12.9	25	44	1.4	196	1	1	2	1	0	0	0	1	1	0	1	1	0	9	48	27	13	5	1	0	0	1	1
35	2	23.3887	101	86	22	100	36.89	10	2.9	3.44828	21.3	138	9.6	15.5	136	3.7	2.7	22	131	37.5	2	9.4	460	633	0.6	225	1	1	2	1	0	0	0	0	0	0	0	1	0	13	45	30	15	3	1	1	1	1	1
66	1	31.1169	67	59	19	100	36.72	135	2.8	48.2143	19	152	7.2	19.5	142	4.1	2.9	16.8	182	30.3	1.5	22.2	88	149	1.8	278	0	1	3	1	1	0	0	0	0	1	0	1	0	9	81	23	15	7	0	1	1	1	0
61	2	28.2699	59	104	20	94	37.06	14	3.2	4.375	18.2	213	13.6	13.2	137	4	1.1	15.8	456	35.3	1.4	0.8	18	23	0.8	886	1	1	3	1	0	0	0	1	0	0	1	1	0	0	20	24	15	6	0	0	0	1	1
54	2	22.3772	103	75	9	96	38.94	28	2.4	11.6667	14.1	109	11.4	15.8	137	4.7	1.5	17.1	356	36.6	1.6	6.3	17	48	1.1	253	0	1	2	1	0	0	0	1	0	0	0	0	0	9	45	38	15	5	0	0	0	0	0
55	1	37.6378	98	52	15	100	35.17	23	4.3	5.34884	8.9	118	8.2	15.5	141	4.7	10.3	31.8	98	136.4	3.2	14.5	106	391	3.2	117	0	1	3	1	1	0	0	0	0	0	0	1	0	11	85	43	15	4	1	1	1	1	0
61	2	20.2479	98	80	25	100	36.67	10	3.4	2.94118	11	198	7.7	19.2	149	3	10.1	24.8	263	34	2.2	4	1010	1560	1.1	4242	0	1	2	1	0	0	0	0	1	1	0	1	1	9	37	33	15	6	1	0	0	0	0
65	2	23.8804	97	68	18	98	35.94	13	2.2	5.90909	26.6	569	10.4	15.5	141	3.8	1.8	14.8	204.822	28.8	1.3	0.2	21	48	0.6	223	0	1	2	1	1	0	0	0	1	0	0	0	0	2	28	40	14	4	0	0	0	1	0
65	1	19.9837	106	70	18	100	36.61	10	2.7	3.7037	10.2	116	8.8	14.1	144	4.4	9.2	15.4	197	46.7	1.4	4.5	210	1093	1.1	1072	0	1	3	1	0	0	0	1	0	0	0	1	0	10	73	46	15	5	1	1	1	1	1
78	2	28.6264	64	75	16	100	36.28	88	2.8	31.4286	15.6	101	7.7	22	138	7.1	2.3	17.5	138	39.9	1.6	4.1	15	35	3.1	225	0	1	3	1	1	0	0	0	0	0	0	1	0	10	47	35	14	8	0	0	1	0	0
61	2	40.958	112	124	20	99	36.17	22	2.4	9.16667	13.8	60	10.3	16.7	146	4.6	1.2	14.5	148	31.1	1.3	6	27	69	1.1	256	1	1	3	1	1	0	0	0	1	0	1	1	0	16	93	50	3	7	0	0	1	1	1
61	2	37.2411	71	74	22	92	37.56	24	3.5	6.85714	19.7	292	7.5	20.5	144	3.2	0.9	15.4	204.822	31.2	1.4	0.4	7	18	1.3	190	0	1	2	1	0	1	1	0	1	1	0	0	0	8	38	26	15	10	0	0	0	0	0
71	1	19.2744	86	61	16	100	35.89	39	2.8	13.9286	13.8	225	12.6	19.5	133	5.5	1.4	150	204.822	145.2	13.8	2.5	85	229	2.4	288	0	1	3	1	0	0	1	0	1	0	0	1	0	10	68	27	15	7	1	0	1	1	1
80	1	22.5827	43	67	19	97	36.39	36	2.6	13.8462	21.1	261	8.7	14.9	136	5.1	7.3	13.7	204.822	26.1	1.3	0.7	22	37	1.2	270	0	1	2	1	0	1	0	0	1	0	0	1	0	7	70	38	12	10	0	0	0	1	0
73	2	31.25	90	84	19	100	36.83	14	3.6	3.88889	6.6	149	12.1	15.9	136	5.4	3.4	14.6	222	66.3	1.3	1.7	253	255	1.2	196	1	1	2	1	1	0	0	1	0	1	0	1	0	7	36	27	13	8	0	0	0	1	1
55	2	23.6299	124	71	20	100	37.06	44	2.2	20	36.4	156	10.3	13.5	131	4.3	5.5	20.9	737	34.6	1.9	2.1	21	55	2.5	224	0	0	0	1	0	1	0	0	1	0	1	1	0	10	66	36	15	9	0	0	1	1	1
61	1	17.5737	69	114	20	97	36.44	42	2.5	16.8	12.8	286	9.9	16.9	140	2.1	0.9	13	298	26.2	1.2	0.6	12	17	2.1	199	0	0	0	1	0	0	0	0	1	0	0	0	0	7	52	38	14	4	0	0	0	1	0
72	2	30.1162	95	103	16	93	37.06	19	3.3	5.75758	17.9	238	12.3	14	139	3.3	3.21904	12.5	204.822	27.6	1.2	0.6	35	28	1.3	178	0	1	2	0	0	0	0	1	0	1	1	0	0	2	33	34	13	11	0	0	1	0	0
80	2	23.8017	86	110	25	95	36.39	74	2.9	25.5172	9.1	47	11.6	18	135	5.8	3.7	18.3	204.822	56.9	1.7	2.8	26	44	5.5	268	0	1	3	1	0	0	1	0	0	1	0	0	0	14	67	37	14	11	0	0	1	1	0
47	1	40.9157	105	80	32	94	37	11	2.7	4.07407	10.9	138	10.1	15.4	135	4.2	3.8	17.4	406	31.3	1.6	1.2	93	341	0.8	668	0	1	2	1	1	0	0	1	1	0	1	1	0	8	55	36	15	2	0	0	1	0	0
59	2	30.0099	79	100	21	95	36.78	76	3.7	20.5405	10.3	16	7.5	19.9	139	4.5	2.5	24.4	106	67.2	2.2	9.2	10	28	8.4	251	1	1	3	1	0	0	0	1	0	0	1	1	0	13	89	42	12	7	0	1	1	1	1
31	1	33.2638	124	73	26	94	37.39	26	2.7	9.62963	20.8	314	9.4	16.8	131	3.6	3	28.9	562	70.3	2.6	2.6	77	197	6.7	587	1	1	1	1	0	0	0	0	1	0	0	0	0	15	75	39	13	6	1	0	1	1	1
61	1	36.5473	94	71	14	100	35.44	72	3.4	21.1765	6.1	42	8.9	16.5	133	6	4.9	32.7	158	43.7	3.4	13.1	19	47	3.6	139	1	1	3	1	0	1	1	0	1	0	0	1	0	21	124	53	7	10	1	1	1	1	1
67	2	31.3322	95	79	28	97	36.72	28	2.2	12.7273	6.6	38	7.3	17.2	128	4.7	2.2	22.2	152	39.5	2	5.3	20	51	1	482.686	1	1	3	1	1	0	0	0	0	0	0	0	1	8	60	37	15	6	1	1	1	1	1
51	2	25.9701	117	75	14	100	37.28	39	2.3	16.9565	12.2	52	5.8	18.4	153	6.4	8.5	24.2	91	53.2	2.2	8.8	37	93	1.7	249	0	1	3	1	1	0	0	0	1	0	0	1	0	16	128	56	7	4	1	1	1	1	1
67	2	46.0601	99	86	19	97	36.94	31	2.7	11.4815	9.2	254	10.2	14.8	145	4	1.7	16.9	204.822	30.7	1.6	0.3	26	26	1.8	258	0	1	3	1	1	1	1	0	1	0	0	0	0	7	45	37	15	5	0	0	0	0	0
65	1	16.6525	86	79	19	98	36.89	52	2.4	21.6667	7.3	81	11.3	19.6	139	4	2.1	14.2	204.822	84	1.3	18	53	89	2.5	482.686	0	1	1	0	0	0	1	1	1	0	0	1	0	8	36	17	15	9	0	0	0	1	0
37	2	22.903	100	100	15	100	36.61	113	1.6	70.625	19.1	83	9.8	15.7	148	3.3	1.6	15.9	191	22.4	1.5	15.2	236	260	2.4	399	1	1	3	1	0	0	0	0	0	0	0	1	0	11	57	22	15	3	0	0	1	1	1
64	1	22.1797	79	71	13	98	36.89	7	2.3	3.04348	9.3	145	6.9	14.6	124	5.2	1.1	26.2	91	46.2	2.4	0.8	7	21	1.2	130	0	1	3	1	0	0	1	0	0	0	0	1	0	5	48	28	15	6	1	0	1	0	0
56	2	33.4113	79	98	17	100	36.5	19	2.4	7.91667	5.7	86	9	14	136	3.4	1.6	17.1	204.822	31.4	1.6	1.1	75	66	0.8	312	0	1	2	1	1	1	0	0	0	0	0	0	0	5	37	33	13	3	1	1	0	0	0
62	2	49.3552	116	84	20	98	37.56	13	2.8	4.64286	19.7	210	7.6	21.6	132	4.5	1.4	16.5	307	34.2	1.5	1.8	8	14	0.7	159	1	0	0	0	0	0	0	1	0	0	0	1	0	5	31	26	14	6	0	0	1	1	1
70	2	22.7875	101	73	12	100	36.44	47	1.6	29.375	13.7	61	7.2	21.4	131	3.9	5.6	34.6	91	48.9	3.1	5.7	20	46	3.5	229	1	1	3	1	0	0	0	0	0	0	0	1	1	9	90	29	15	7	1	1	1	1	1
40	1	25.5983	142	73	43	85	36.33	13	3.6	3.61111	29	228	7.3	19.7	132	4.2	3	29.7	325	45.9	2.7	10.2	37	108	0.7	329	0	1	3	1	0	0	0	1	1	0	0	1	0	12	81	41	15	1	1	1	1	1	1
32	2	29.2359	121	85	20	94	36.28	8	3.3	2.42424	16.8	77	5.8	14.4	112	4.9	2.6	31.6	104	47.3	2.9	9.3	140	978	0.3	961	0	1	3	1	1	0	0	1	1	0	0	1	0	7	80	36	14	5	1	1	1	1	1
56	2	30.4279	74	122	23	100	36	26	2.7	9.62963	5.4	36	9.1	15.8	134	4	3.1	28	113	54.6	2.7	4.7	22	29	1.6	146	1	1	3	1	0	0	0	0	0	0	0	1	0	10	54	41	14	5	1	0	1	1	1
48	2	29.2359	146	90	24	99	36.72	47	2.1	22.381	20.2	87	8.2	17.7	128	4.5	7.1	23	204.822	43.2	2.2	2.1	27	62	1.1	199	0	1	3	1	1	0	0	0	0	0	0	1	0	12	74	46	15	1	1	0	0	0	0
51	1	24.2773	125	83	15	96	37.83	13	2.3	5.65217	27.5	168	11	14.6	136	4.5	3	23.9	166	39.9	2.2	14.7	65	88	0.8	482.686	1	1	2	1	0	0	0	0	0	0	0	1	0	15	77	41	15	4	0	0	1	1	1
64	2	37.911	99	67	22	100	36.67	113	4.8	23.5417	12.5	135	9.3	16.7	134	5	3.8	31.7	222	46.2	2.9	37.1	38	90	7.2	187	0	1	2	0	0	0	1	1	0	0	0	1	0	10	70	24	15	4	0	0	1	0	0
73	2	31.1083	81	72	21	99	36.39	49	3.5	14	6.6	168	10.9	14.2	120	5	1.4	12.8	204.822	35.2	1.2	1.3	26	39	1.3	200	1	1	2	0	0	0	1	0	0	1	0	0	0	4	50	27	14	7	0	0	1	1	1
68	1	26.4668	99	84	26	95	37	11	3	3.66667	2.1	128	8.7	18.5	134	3.2	1.6	14.5	204.822	30.7	1.3	0.7	15	45	0.7	406	0	1	3	0	0	0	0	0	1	0	0	1	0	2	35	36	15	5	0	0	1	0	0
54	2	40.2727	64	97	20	96	36.72	48	4.3	11.1628	11.8	288	14.9	14.9	144	4.4	1.4	16.5	204.822	30.5	1.5	2.1	36	48	1.1	262	0	1	1	0	0	0	1	0	0	0	1	0	0	2	28	24	15	5	0	0	0	1	0
62	1	13.9578	85	91	15	99	36.67	20	3.6	5.55556	4.9	239	10	15.4	136	4.5	3.21904	11.4	204.822	34.1	1.1	0.3	24	31	1.4	362	0	1	1	0	0	0	0	0	0	0	0	0	0	3	39	31	13	7	0	0	0	0	0
60	2	35.6789	97	54	18	100	36.56	10	2.4	4.16667	7.1	114	8.3	14.3	140	4.8	4.8	22.2	164	41.3	2	1.2	28	55	0.7	195	0	1	1	1	1	0	0	1	0	1	0	0	0	6	21	30	15	6	1	1	0	0	0
78	2	37.2732	82	103	23	90	36	62	2.7	22.963	14.3	209	7.6	14.4	129	6	1.1	16.7	807	57.4	1.5	18	25	29	5.2	284	0	1	3	1	0	0	1	0	1	0	0	0	0	8	50	38	14	9	0	0	1	1	1
62	1	16.5816	111	67	18	97	36.67	62	3.7	16.7568	10.6	65	8.1	15.5	131	3.5	7.8	18.4	204.822	62.8	1.7	2.1	56	142	2.1	325	0	1	2	1	0	0	0	0	1	0	0	1	0	16	83	53	7	5	1	0	1	0	0
68	2	28.4003	76	70	16	98	36.39	22	3	7.33333	15.6	253	11.4	15	133	4	2.1	16.9	245	30.2	1.5	1.3	30	48	0.5	142	1	1	3	1	1	1	0	1	0	1	0	1	0	11	100	52	3	12	0	0	1	1	1
47	2	19.5682	91	89	17	98	37	61	3.8	16.0526	37.8	168	7.7	21.1	138	6.8	3.21904	18.3	204.822	35.5	1.7	26.3	48	78	1.6	162	1	1	1	0	0	0	0	1	0	0	0	1	0	8	61	27	15	3	0	0	0	1	1
57	1	40.5329	137	102	25	96	36.78	31	3.6	8.61111	14.7	158	13.5	13.8	132	5.1	6.1	52.7	58	33.9	4.8	3	3000	10685	2.9	9765	0	1	3	1	0	1	1	1	0	1	0	0	1	11	87	47	14	7	1	0	1	0	0
45	2	24.4603	105	67	15	100	38.11	15	3	5	3.8	136	12.7	14.9	135	3.9	1.1	16.5	172	36.3	1.5	2.5	35	40	0.7	263	0	1	1	1	0	0	0	0	1	0	0	0	0	10	67	46	7	1	0	0	0	0	0
67	1	38.407	90	68	17	98	37	96	3.2	30	7.4	60	13.5	14.4	142	4.5	1.9	13.5	204.822	26.7	1.2	1	20	30	3.7	312	1	1	2	1	0	1	0	0	1	0	1	1	1	12	44	37	15	7	1	1	1	1	1
45	2	28.4348	105	69	25	92	36.33	12	3	4	23.3	43	6.8	17.9	135	3.6	13.7	39.9	127	71.5	3.7	11.9	65	142	3.9	288	0	1	3	1	0	1	0	1	1	1	0	1	0	15	91	37	14	7	1	1	1	1	1
66	2	28.7698	81	64	13	100	36.44	104	2.8	37.1429	4.1	38	9	17.5	137	3.4	3.21904	19.8	105	44.2	1.9	4	50	70	3.5	360	0	1	3	1	0	1	1	0	0	1	0	1	1	10	74	25	8	11	0	0	1	0	0
68	2	24.6713	78	67	30	88	36.33	31	4.8	6.45833	15.1	119	10.1	14.4	137	5.2	2.2	27.5	93	68.5	2.5	3	41	45	1.8	207	1	1	2	1	0	1	0	0	0	0	0	1	0	11	65	29	14	7	0	0	1	1	1
66	2	35.1852	86	60	17	100	30.56	91	2.3	39.5652	14.5	139	7.9	19.3	136	5	2	18.1	305	50.5	1.7	2.4	17	25	6.1	162	1	1	3	1	0	0	1	0	0	0	0	1	1	12	104	37	11	6	1	0	1	1	1
68	1	26.8566	94	86	24	100	37.06	27	2.5	10.8	5.6	143	8.9	19.2	123	4.8	6.2	74.4	151	44	6.7	3.6	959	4411	2.6	1152	1	1	2	1	0	0	0	1	1	0	0	1	0	10	71	41	15	5	0	0	0	1	1
52	2	25.5456	52	71	18	94	35.61	53	3.2	16.5625	10	91	13.2	18.7	126	4	3.9	45.1	98	103.1	4.4	22.2	107	330	2.7	355	1	1	3	1	0	0	0	0	0	0	0	1	1	11	79	26	12	4	1	1	1	1	1
61	2	27.9549	67	88	12	100	36.5	30	2.6	11.5385	12.6	171	10.3	19.1	141	3.6	3	14.9	185	36	1.4	1.9	14	47	1.7	336	1	1	2	1	0	0	0	1	0	0	0	1	0	6	41	24	15	8	0	0	1	1	1
61	1	29.7619	97	73	16	98	37.33	14	2.8	5	16.1	105	10.1	20.5	139	4.5	1.6	23	208	37.4	2.1	4.1	397	922	0.7	803	1	1	2	1	0	1	0	0	0	0	0	0	0	9	52	37	15	7	0	0	0	1	1
62	2	21.551	91	84	15	99	37.61	28	3.1	9.03226	9.2	88	8.6	17.1	136	3.8	5.1	14.6	115	39.2	1.3	4.8	400	500	1.5	421	0	1	2	1	1	0	0	1	0	0	0	1	0	10	41	32	15	7	1	1	0	0	0
66	2	27.4048	74	78	14	97	36.39	106	3.8	27.8947	18.9	261	7.9	19.8	131	4	2.5	27.6	144	64.8	2.5	35.8	111	335	3.7	436	0	1	3	1	1	1	0	1	0	0	0	1	0	12	100	42	14	7	0	0	1	1	1
60	2	35.298	92	56	22	96	37.5	15	3.2	4.6875	12.6	112	11.3	15.9	145	4.6	5.6	17.6	151	42.9	1.6	5.7	1322	1868	0.9	482.686	0	1	2	1	0	0	1	1	0	0	0	1	0	9	48	26	15	6	0	1	1	0	0
53	1	38.2299	94	58	10	100	37.06	33	3.2	10.3125	3.8	76	7.8	17.3	135	5.5	1.4	14.2	204.822	27.1	1.3	2.3	6	18	6.6	296	1	1	3	1	0	1	0	1	0	0	0	1	0	9	48	19	15	10	0	0	1	1	1
64	2	30.9666	111	100	21	99	36.5	18	2.9	6.2069	16.8	140	11.2	15.6	125	4.8	5.7	27.6	151	57.6	2.6	6	32	39	0.9	132	0	1	2	1	1	0	0	0	1	1	0	1	0	8	46	31	15	11	0	0	1	0	0
77	1	34.3231	85	78	16	97	36.56	55	2.5	22	15.9	166	5.1	22.1	138	4.7	3.21904	24.5	154	41.4	2.3	7.4	18	52	1.9	338	0	1	2	1	0	0	0	1	1	0	0	1	0	7	55	25	14	9	0	0	0	1	0
60	2	28.5454	68	109	17	97	36.83	30	4	7.5	12.3	400	12	16.4	139	4.7	3.21904	14.4	204.822	30	1.3	0.2	33	18	1.1	271	0	1	1	0	1	0	0	0	0	0	0	0	0	0	24	18	15	4	0	0	0	0	0
69	2	34.049	73	66	18	99	36.33	69	4.4	15.6818	17.4	172	6.1	25.8	126	3.5	1.5	19.1	194	45.5	1.7	46.2	38	95	3.3	221	0	1	3	0	0	1	0	1	0	0	0	1	0	10	73	32	14	9	0	0	1	1	1
76	2	27.766	92	107	22	97	36.89	14	2.8	5	9.6	170	10.4	13.6	141	4.2	0.9	13.2	204.822	27.8	1.2	1.7	24	33	1.1	258	0	1	2	1	0	1	0	0	0	1	0	1	0	1	31	41	15	10	0	0	0	0	0
63	2	21.4464	86	68	14	100	35.83	39	3.7	10.5405	7.3	83	8.6	15.5	140	3.7	9.6	28.8	204.822	49.8	2.6	3.3	23	50	2.1	168	1	1	3	1	0	0	0	1	0	0	0	1	0	10	49	37	15	4	0	0	1	1	1
59	2	24.3363	125	110	32	100	36.5	55	3.4	16.1765	1.6	80	11.4	15.5	125	5.4	1.9	14.4	204.822	40.8	1.3	0.9	11	29	6.4	185	0	1	3	1	0	1	1	0	1	0	0	0	0	11	80	40	15	9	0	0	0	0	0
59	1	24.8016	70	70	15	99	36.78	22	2.7	8.14815	6	152	10	16.3	141	4.2	1.1	14.8	184	27.2	1.3	1.8	13	28	1	340	1	0	0	1	0	0	0	0	1	0	0	1	0	4	31	30	15	4	0	0	1	1	1
58	2	25.4545	102	61	16	94	37.61	12	2.5	4.8	10.3	136	12.6	14.5	135	4.4	4.5	14.6	451	38.7	1.4	0.2	667	3103	1.2	466	0	1	3	1	1	0	0	0	0	0	0	1	0	11	43	43	13	6	0	1	0	0	0
69	1	24.641	109	83	20	100	36.83	15	3.3	4.54545	15	208	12	14.1	135	3.5	2.5	12.6	204.822	78.9	1.2	0.4	31	59	0.9	342	0	1	2	1	1	1	0	0	1	0	0	0	0	8	65	41	15	5	0	0	1	0	0
38	2	33.7976	78	87	16	99	36.5	17	2.5	6.8	8.1	49	7.7	15.9	118	5.2	3.21904	20	104	40	2	8	46	91	1	261	1	1	2	1	0	0	0	0	0	0	0	1	0	6	51	18	15	3	0	0	1	1	1
71	2	30.3997	106	63	24	97	36.61	94	2.8	33.5714	10.2	101	6.7	18.6	134	5.2	1.9	19.2	201	55.5	1.7	8.5	27	70	3.6	297	0	1	3	1	0	0	0	0	1	1	0	1	0	11	91	35	10	7	1	1	1	1	1
23	2	22.3214	85	50	18	100	36.39	12	2.6	4.61538	6.1	141	10.6	16.9	141	3.6	2.5	22.5	203	34.9	2.1	17.3	312	361	0.6	138	0	1	2	1	0	0	0	0	0	1	0	0	0	14	42	22	15	2	1	0	0	0	0
59	2	32.2421	85	70	18	99	37.39	33	3.5	9.42857	8.2	69	7	19.4	126	4.7	3.21904	19.6	103	57.9	1.8	22.9	69	191	1.2	147	0	1	2	0	1	0	0	0	0	0	0	1	1	8	42	17	15	6	1	0	0	0	0
69	2	24.589	80	96	17	88	36.89	33	2.7	12.2222	7.1	96	17.1	15.8	136	4.3	4.2	14.9	364	26.9	1.4	1.5	40	37	1.2	363	1	1	3	1	0	1	1	0	1	1	1	1	0	7	55	31	13	7	0	0	1	1	1
58	1	27.851	65	73	39	95	36.67	37	1.9	19.4737	12.3	158	9.6	15.2	137	2.6	1.2	16.4	101	29.6	1.5	1.7	16	22	2.7	153	0	1	3	1	1	0	1	0	0	0	0	1	1	10	76	42	14	6	0	1	0	0	0
73	1	28.4919	71	57	12	99	37.56	24	3.8	6.31579	8.7	59	8.6	18.1	138	4	4.7	37.8	88	64.3	3.9	12.4	32	63	1.6	291	0	1	3	1	0	1	0	0	1	0	0	0	0	14	80	37	14	5	1	1	1	0	0
34	2	34.5218	90	73	29	91	36.78	102	4	25.5	35.6	126	6.7	20.2	133	3.8	1.5	26.6	150	51	2.4	51.2	12	70	8.8	430	0	1	3	1	0	0	0	1	1	0	0	1	0	17	100	44	13	5	1	0	1	1	1
31	2	24.8016	118	68	16	100	36.8	31	3.1	10	15.9	94	5.1	22.4	135	4.3	5.5	22.2	175	93.6	2.1	20	53	135	0.6	624	1	1	3	1	0	0	0	0	1	0	0	0	1	10	62	15	12	3	0	0	1	1	1
59	2	32.6531	114	79	35	97	36.61	25	2.6	9.61538	5.9	41	12	13.9	142	3.7	2.8	13.7	166	36.7	1.3	2.8	33	52	1.8	990	0	1	3	0	0	1	1	1	0	1	1	1	0	11	67	45	15	13	0	0	0	1	0
64	1	19.3548	113	81	20	98	36.56	32	3.4	9.41176	10.9	89	8.2	18.5	137	2.9	2.8	21.5	141	38	2	6.3	10	52	1.2	401	1	0	0	1	1	0	0	0	0	0	0	1	0	8	53	38	15	5	1	1	1	1	1
47	2	22.7592	111	92	15	99	37	41	3.2	12.8125	15.3	65	7	17.4	134	4.4	1.9	20	204.822	49.7	2	7.3	54	95	1.6	197	1	1	3	1	0	0	0	0	1	0	0	0	0	15	67	41	15	5	1	1	1	1	1
67	2	24.8443	114	74	30	100	36.72	14	2.8	5	6.6	85	6.7	16.9	141	4.1	4.1	17.2	204.822	29.7	1.6	4.2	33	52	0.8	255	0	1	2	1	0	1	0	1	0	0	0	0	0	7	37	31	15	6	1	1	1	1	0
75	2	38.9348	88	76	32	97	35.44	48	2.5	19.2	16.7	48	8.3	16.9	137	6.3	5.7	18.4	156	39.5	1.7	3.9	44	66	2.1	267	1	1	2	1	1	0	0	0	0	1	0	1	0	11	111	44	15	7	1	0	1	1	1
75	2	26.396	95	75	14	100	36.72	49	2.4	20.4167	16	154	8.7	15.9	140	4.7	3.21904	17	148	63.1	1.5	4.2	349	503	1.4	282	0	1	2	1	0	0	0	0	0	0	0	1	1	7	71	36	10	6	0	1	1	0	0
53	2	27.6361	82	72	21	97	36.39	44	3.3	13.3333	9.9	54	6.8	18.6	131	6.1	2	24.9	94	150	2.3	28.5	22	59	1.1	390	1	1	3	1	0	0	0	1	0	0	0	1	0	10	57	35	13	4	1	1	1	1	1
50	2	41.4541	85	79	14	95	36.67	97	3.6	26.9444	10.1	34	10.1	19	145	4.7	1.3	16.9	204.822	34.7	1.6	38.5	107	299	9.3	288	0	1	3	1	1	1	0	1	1	1	1	1	0	12	72	36	15	5	0	0	0	0	0
58	1	52.9688	64	55	21	94	37	64	3.3	19.3939	15	158	8.3	15	136	4.4	1.2	16.3	128	27.6	1.5	4.3	47	88	4.6	379	1	1	3	1	1	0	0	0	0	1	0	1	0	11	75	39	15	7	1	1	1	1	1
69	2	28.9811	82	83	6	91	36.44	16	3.5	4.57143	5.9	236	12.3	15.1	137	5.7	1.4	12.7	377	27.6	1.2	0.3	33	76	0.8	1094	0	1	3	1	1	1	0	1	1	1	0	0	0	7	41	37	15	4	0	0	1	1	1
79	2	26.0857	98	62	14	100	32.78	9	2.3	3.91304	47.4	186	10.2	14.9	133	3.4	6.2	20	204.822	40	2	1.4	7	16	0.8	351	0	1	3	1	1	0	1	0	0	1	0	0	0	6	70	46	15	8	0	0	1	0	0
63	2	55.2645	91	85	14	98	36	68	2.4	28.3333	11.2	206	10.7	14.6	121	6.2	1.7	19.2	132	36	1.8	4.5	58	141	2.7	246	0	1	3	1	1	0	0	0	0	0	0	1	1	7	72	27	12	6	1	0	1	1	1
58	2	28.0992	71	68	22	95	37.28	29	2.8	10.3571	49.7	99	14.2	14.5	134	3.6	4.2	20.4	204.822	36.1	1.9	8	174	501	1.8	181	1	1	2	1	0	1	0	0	1	0	0	1	0	16	101	46	7	19	0	1	1	1	1
59	2	26.3251	96	92	15	100	37	18	2.1	8.57143	3.2	127	10.1	14.7	142	4.5	1.3	13.8	214	36.3	1.3	3.3	132	283	1.5	231	0	1	3	1	0	1	0	0	0	0	0	1	0	16	108	40	3	11	0	1	0	0	0
64	2	30.2734	87	66	15	99	38.78	15	2.4	6.25	14.8	94	8.4	16.1	132	4.6	1.1	16.1	213	29.3	1.5	1.8	15	28	0.6	174	0	1	2	1	0	0	0	0	0	0	0	1	0	7	30	35	15	5	0	1	1	0	0
61	2	18.0848	123	80	52	89	37.39	5	2.4	2.08333	9.2	89	8.7	15.3	135	3.3	7.2	19.2	129	46.4	1.8	1.8	25	176	0.8	227	1	1	2	1	0	0	0	0	0	0	0	1	0	4	51	40	14	5	0	0	1	1	1
53	2	24.4473	120	81	21	100	38.11	29	2.7	10.7407	22.4	345	10.1	13.1	139	4.6	2	14.2	593	36.5	1.2	2.3	50	177	1.3	1228	0	1	2	1	1	0	1	0	1	0	0	0	0	11	75	41	15	4	0	0	1	0	0
78	1	38.1648	67	53	13	98	35.78	21	3	7	19.9	256	8.2	13.7	133	5.1	3.4	13	414	25.4	1.2	0.6	15	18	1.2	338	1	1	3	1	1	1	0	1	0	1	0	0	0	5	74	42	14	7	0	0	0	1	1
78	2	31.0624	117	87	14	97	36.94	41	3.7	11.0811	7.4	92	10.6	17.5	136	4.2	2.5	16.2	199	48.7	1.5	1.4	53	41	1.8	360	0	1	3	1	0	0	1	0	0	1	0	0	0	5	59	34	15	7	0	0	0	0	0
66	2	22.782	122	82	21	99	37.11	26	1.9	13.6842	4	57	7.4	20.4	138	3.6	1.8	15.1	204.822	29	1.4	11.5	18	44	1.2	255	0	0	0	1	0	0	0	0	0	0	0	1	0	10	79	37	14	4	0	0	1	0	0
52	2	43.0485	87	88	20	93	36.56	34	4	8.5	6.7	86	8.5	26.8	135	5.5	1.8	16.3	204.822	35.7	1.5	3.1	19	57	3.5	270	1	1	3	1	1	1	0	0	0	0	0	1	0	11	77	37	15	12	0	0	1	1	1
55	2	29.9074	90	71	22	96	36.78	47	3	15.6667	14.5	50	8.9	17.5	132	4.2	3.21904	16.5	132	40.5	1.6	17.6	48	104	1.5	208	0	1	2	1	0	0	0	0	1	0	0	1	0	10	65	32	13	3	0	0	1	0	0
55	2	31.9559	84	77	25	100	37.11	22	2.5	8.8	8.6	66	10.7	16.2	135	3.4	1.9	31.9	71	54.3	2.9	23.1	80	235	0.7	351	0	1	3	1	0	0	0	1	1	0	0	1	0	10	54	40	15	4	1	0	1	1	1
61	2	29.0887	95	69	26	91	37.28	62	3	20.6667	21.1	186	7.9	17.9	121	6.4	1.8	16.5	204.822	36.4	1.5	0.4	20	34	4.2	336	0	1	3	1	0	0	1	0	1	0	0	0	0	9	70	39	13	10	0	0	1	1	1
32	1	23.6323	119	80	24	91	36.44	27	3.4	7.94118	11.7	191	8.8	19.6	133	5	5.4	19.5	204.822	40.8	1.8	4.9	27	46	1	336	0	1	2	1	0	0	0	1	1	0	0	1	0	11	64	30	15	5	0	0	0	0	0
70	1	36.5262	83	108	13	98	37	19	3.1	6.12903	14.6	206	11.5	17.6	142	4.4	1.9	13.2	189	26.1	1.2	0.7	50	102	0.6	503	0	1	3	1	0	0	1	1	0	1	1	1	0	8	35	31	15	6	1	1	0	0	0
78	1	24.974	95	85	27	100	36.89	20	2.7	7.40741	3.5	36	9.1	16.3	139	4.2	4.1	17.6	158	32.2	1.6	2.3	14	23	0.8	190	1	1	2	0	0	1	0	1	0	0	0	0	0	10	62	40	15	9	0	0	0	1	1
45	1	32.1181	104	75	20	99	37	47	2.5	18.8	19.5	123	9.6	16.6	125	5.6	3	20.4	204.822	32	1.9	5.9	15	70	2.2	535	1	1	2	1	0	0	0	0	1	0	0	1	1	17	99	37	12	4	0	0	0	1	1
62	2	17.0068	102	65	14	100	36.11	38	3.3	11.5152	9.6	115	8.1	21.5	134	4.2	3.8	37.4	115	150	3.5	18.2	141	281	1.5	448	1	1	1	0	0	0	1	0	0	1	0	1	0	9	67	26	15	7	0	0	1	1	1
71	2	30.2992	160	82	20	100	36.61	23	2.4	9.58333	2.9	104	14.8	14.3	137	3.6	6.5	29.6	314	42.7	2.7	2.3	6	14	1.2	111	0	1	3	1	0	0	0	1	0	0	0	1	0	9	73	39	15	9	0	0	1	1	1
71	1	25.5937	114	86	15	99	37.44	16	4.1	3.90244	12.8	103	9.4	16.5	139	4.2	3.21904	16.6	204.822	24	1.5	1.1	16	45	0.7	403	1	1	2	0	0	0	1	1	0	0	0	1	0	5	31	22	15	13	0	0	1	1	1
74	2	30.2045	90	59	25	97	36.39	47	3.7	12.7027	24.3	337	6.2	16.1	133	3.4	1.1	13.8	257	35.6	1.3	1.6	20	43	1.4	769	1	1	1	0	0	0	1	0	0	0	1	1	0	4	47	21	15	10	0	0	1	1	1
76	1	28.6501	86	86	22	99	35.94	87	4.8	18.125	7.7	98	9	15.7	142	3.2	2.1	22.4	204.822	40.9	2.1	2.8	11	34	2	133	0	1	1	1	0	1	0	0	1	1	0	1	1	9	77	34	10	16	0	0	1	1	0
34	1	42.449	58	51	9	100	37.56	48	1.9	25.2632	16.1	130	9	20.2	136	4.6	3.1	19.5	142	41.8	1.8	7.1	299	551	4.9	5608	0	1	3	1	0	0	0	0	0	0	0	0	0	15	91	43	15	7	1	1	0	0	0
59	2	28.3447	73	96	21	96	36.22	20	2.4	8.33333	5.4	45	10	16	137	3.7	6	20.3	186	41.1	1.9	1.3	17	36	1.1	267	0	1	1	1	0	0	0	0	1	0	0	1	0	5	46	25	15	4	0	0	1	1	0
38	1	21.6128	110	96	22	100	36.72	10	3.2	3.125	6	55	7.5	18.7	142	2.9	3.2	22.1	92	57.2	2	6	22	53	1.4	377	0	1	3	1	0	0	0	1	1	0	0	1	0	13	55	29	9	3	0	0	0	0	0
78	2	32.2764	64	69	16	99	35.83	93	2.5	37.2	9.7	61	7.7	19.6	146	6.1	1	15	204.822	33.9	1.4	0.7	20	27	5.4	225	0	1	3	1	0	1	1	0	1	0	0	0	0	17	78	51	7	11	0	0	1	1	1
72	2	22.8612	99	61	23	100	36.17	69	3.1	22.2581	2.2	196	9.2	14.4	136	3.8	1.4	14.7	211	36.1	1.4	2.3	8	20	2.4	110	1	1	2	1	0	0	1	0	0	0	0	1	0	11	77	33	9	9	0	0	1	1	1
44	2	23.2464	106	85	20	100	35.56	74	3.9	18.9744	10.8	148	10.5	17.6	138	3	2.9	18.4	221	38.8	1.7	1.8	27	55	3.4	214	1	1	3	1	0	0	0	0	1	0	0	0	1	9	109	52	6	5	0	0	1	1	1
63	1	41.2796	77	80	15	98	37.06	29	3.6	8.05556	12.3	76	11.5	19.6	134	4.7	1.9	33.6	64	69.6	3.2	32.2	77	121	0.8	327	1	1	2	1	1	0	0	1	0	1	0	1	0	7	47	23	15	5	1	1	1	1	1
52	2	34.6988	80	73	7	92	36.78	12	2.3	5.21739	17	108	9.8	15	139	4.1	2.2	20.2	343	39.6	1.8	1.1	17	48	0.5	389	0	1	2	1	0	1	1	0	0	1	0	1	0	2	33	25	15	4	0	0	1	0	0
57	2	27.6006	73	98	18	98	36.5	12	3.7	3.24324	6.6	222	12.2	13.7	133	3.7	3.21904	9.9	204.822	29.1	0.9	0.6	44	31	0.9	214	0	1	1	0	1	0	0	0	0	0	0	0	0	4	32	37	9	2	0	0	1	0	0
60	1	28.699	78	70	10	100	37	29	2.3	12.6087	10.4	89	9.2	17.1	143	4.3	6.1	18.8	181	32.2	1.7	0.9	1238	1766	3.7	20500	0	1	3	1	0	0	0	0	0	0	0	0	0	15	99	40	15	4	1	1	0	0	0
50	1	32.6228	104	72	30	91	37.11	19	2	9.5	28.5	188	6.7	27.5	137	4.6	4.7	15.8	158	43.7	1.5	17.8	44	179	3.6	476	1	1	3	1	0	0	0	1	1	0	0	1	0	14	98	37	9	3	0	0	1	1	1
57	2	35.9269	77	68	14	100	36.72	24	1.9	12.6316	16.3	117	9.6	19.1	142	4.8	2.3	17.8	111	36.1	1.6	3.1	46	81	0.8	264	1	1	3	1	0	0	0	0	0	0	0	0	0	12	83	43	15	4	1	1	0	1	1
70	2	24.8016	96	61	20	92	36.78	103	4.2	24.5238	8.3	186	7	17.5	121	4.1	1.3	18.5	175	42.3	1.7	12.4	34	106	2	217	0	1	2	1	0	0	0	1	1	0	0	1	0	10	73	35	14	8	0	0	1	1	1
76	2	35.9094	134	85	20	93	36.78	88	2.1	41.9048	29.8	79	12.8	15.2	140	4.5	3.7	16.7	204.822	26.2	1.5	1.2	24	34	2.4	435	0	1	2	1	0	0	0	0	1	0	0	1	0	9	91	37	13	8	0	0	1	1	1
69	2	23.3556	108	65	27	95	36.33	81	4.1	19.7561	4.4	197	10.4	18.7	138	4.2	2.8	20.6	218	43.5	1.9	6.2	14	27	2	119	1	1	3	1	0	0	1	0	1	0	0	1	0	8	76	48	15	9	1	0	1	1	1
51	2	31.9673	94	62	22	96	36.61	32	3.2	10	11.1	78	7.1	17.3	128	4	3.2	25.9	96	43.6	2.4	9.4	18	36	2	233	0	1	2	1	0	0	0	1	1	0	1	1	0	9	95	31	14	5	0	0	0	1	0
64	1	42.8219	96	51	17	97	37.06	42	2.4	17.5	45.9	1237	9.4	15.2	126	4.2	1.4	25.7	364	35.4	2.5	0.5	20	64	2.6	482.686	0	1	3	1	0	1	0	0	0	1	0	0	0	4	65	24	14	5	1	0	0	1	0
76	1	28.3556	69	55	21	95	36.17	22	1.8	12.2222	5.6	162	9.2	16.7	144	3.3	3.21904	15.4	204.822	32.4	1.4	1.6	18	26	0.4	195	0	0	0	1	0	0	0	0	0	0	0	0	0	3	55	33	14	6	0	0	1	0	0
39	2	49.6834	91	96	21	100	36.5	76	2.4	31.6667	14	55	5.8	14	132	3	3.21904	20	204.822	40	2	18	53	89	4.5	482.686	0	1	3	0	1	0	0	1	0	0	0	1	0	3	27	38	15	4	0	0	0	1	0
69	1	23.2781	73	66	20	95	36.89	183	3.9	46.9231	4.6	56	8.7	22.9	140	5	2.4	28	204.822	50	2.7	46.7	51	96	2.4	482.686	1	1	3	1	0	1	0	1	0	0	0	1	1	12	96	43	7	6	1	1	1	1	1
64	2	28.9116	85	86	14	100	36.83	10	2.1	4.7619	6.6	194	8.4	23.4	147	4.2	3.6	21.6	222	45	2	1.3	186	491	1.5	238	0	1	3	1	1	1	0	1	1	0	0	1	0	7	63	35	13	7	0	0	1	1	1
59	2	25.9708	88	59	16	100	36.89	36	3.1	11.6129	16.7	100	10	15.4	139	5.4	6.2	18.9	91	115.9	1.8	4.7	15	28	1.4	213	1	1	2	1	0	0	0	0	0	0	0	1	0	17	124	52	3	4	1	1	1	1	1
53	2	33.0796	95	96	20	95	36.94	50	2.8	17.8571	9.6	39	13.3	18.9	142	3.6	1.4	28	131	40.1	2.6	4	1451	315	1	335	0	1	3	1	0	0	0	0	1	0	0	0	0	11	38	34	15	3	0	0	0	0	0
80	2	26.1834	83	66	17	100	36.5	18	3	6	6.1	137	9.1	13.2	131	3.7	2.1	14.2	204.822	34.4	1.3	2.4	39	112	1	206	0	1	2	1	1	0	0	0	0	1	0	0	0	5	27	38	14	12	0	0	1	0	0
54	2	33.8187	82	84	20	97	36.39	26	3.2	8.125	8.9	242	7.8	15.3	126	5.1	0.9	19.3	266	36.2	1.8	0.2	16	26	1.5	269	0	0	0	1	0	1	1	0	0	1	0	1	0	3	34	21	15	8	0	0	0	1	0
67	2	17.5781	98	92	18	99	37.11	15	2.7	5.55556	3.9	225	10.3	17.5	141	3.7	3.1	18	156	44.1	1.6	1	13	46	0.6	482.686	0	1	3	1	1	0	0	0	0	1	0	1	0	6	75	42	15	6	1	0	0	1	0
55	2	25.1559	80	50	10	96	36.28	45	2.1	21.4286	25.6	297	8.2	17.9	136	3.6	1.4	16.6	489	33.1	1.5	0.5	14	16	3.9	482.686	0	1	1	1	0	1	1	0	1	0	0	0	0	9	57	34	15	10	0	0	1	0	0
57	1	26.2994	108	89	31	100	36.5	21	2.8	7.5	16.9	57	16.4	17	143	3.6	2	14.5	351	29.4	1.3	1.9	24	66	0.7	268	1	1	2	1	1	0	0	0	1	0	0	1	0	8	44	40	15	5	1	1	1	1	1
68	1	23.8754	85	71	20	99	36.28	85	2.4	35.4167	14.5	95	7.3	17.2	138	3.9	2.1	19.8	125	39.9	1.8	15.1	90	165	1	264	1	1	3	1	1	0	0	0	0	0	0	1	0	8	69	33	14	5	1	1	1	1	1
79	2	34.5451	80	69	14	82	37.11	15	2.9	5.17241	12.5	50	10.1	15.4	142	4.4	5.5	21.2	124	150	2	1.8	16	45	0.9	402	0	1	3	1	0	0	0	0	0	0	0	1	0	8	54	36	15	6	0	1	0	0	0
60	2	38.9739	123	86	15	100	36.94	78	2.7	28.8889	21.4	350	11.5	15.9	133	5.6	1.1	20	471	40	2	3.7	101	110	7.8	187	0	1	3	0	0	0	1	0	0	1	0	0	0	7	60	33	15	5	0	0	0	1	0
59	2	28.7109	75	66	12	99	36.56	19	3.9	4.87179	14.6	121	9.7	17.9	133	4.7	2.1	14.9	172	66.1	1.4	1.6	95	144	1	201	0	1	3	0	1	1	0	1	0	1	0	1	0	4	35	23	15	8	0	0	1	0	0
60	2	29.7905	97	67	22	100	37.5	16	3	5.33333	8.9	138	10.1	16.4	139	4.4	4.5	14	135	44	1.3	3.3	387	661	0.9	702	0	1	2	1	1	0	0	0	0	0	0	0	0	9	40	39	13	4	1	0	0	1	0
63	2	26.4802	120	57	20	100	37.5	17	2.4	7.08333	10.9	114	11	14.9	140	5.4	6.4	17.2	176	38	1.6	0.8	74	152	2.3	436	0	1	2	1	0	0	0	0	0	0	0	0	0	14	65	46	12	4	1	1	1	0	0
47	2	33.9073	71	65	23	90	36.78	42	3	14	12	129	10.3	16.3	136	5.9	1.6	16	104	34.9	1.5	8	41	93	3.4	187	0	1	2	1	1	0	0	0	0	0	0	1	0	8	81	23	15	10	0	0	0	1	0
57	2	29.691	83	102	18	94	36.56	124	3.8	32.6316	9.6	73	10	23.1	140	6.4	12.2	18.2	266	38.2	1.7	2.2	32	69	7.2	195	1	1	3	0	0	0	0	1	0	0	1	1	0	11	61	39	15	10	0	0	1	1	1
59	2	35.7847	71	58	18	100	36.39	73	3.9	18.7179	6.7	25	7.1	16.8	138	3.8	3.21904	13.9	296	29.4	1.3	2.9	20	20	1.6	556	0	1	1	1	0	1	1	1	0	1	0	1	0	8	50	45	14	10	0	0	1	0	0
78	1	17.2194	65	51	21	94	36.17	11	3.7	2.97297	7.5	93	8.2	15.2	140	3	3.21904	18.3	204.822	67	1.7	0.9	14	33	0.7	134	0	1	3	0	1	0	0	0	1	1	0	1	0	3	29	33	15	7	0	0	1	0	0
44	2	24.9469	92	94	18	100	37.17	22	3.3	6.66667	5.4	66	8.4	19.3	141	3.5	2.7	17.2	199	31.9	1.6	12.2	309	738	1.4	257	1	1	3	1	1	0	0	1	0	0	0	1	0	10	54	27	15	5	0	0	0	1	1
66	1	19.6995	83	68	21	96	36.56	44	3.4	12.9412	5.6	36	7.7	22.4	117	5.3	2.5	24.3	73	45.1	2.2	3.4	32	44	1.4	333	0	1	2	1	0	0	0	0	0	0	0	1	0	8	62	27	14	11	0	0	0	1	0
45	2	32.8798	90	64	23	92	37.06	61	2.8	21.7857	11.4	120	11	16.8	129	4.8	5.5	20.4	204.822	47.1	1.9	11	47	73	2.4	197	0	1	1	1	0	0	0	0	0	0	0	0	0	15	105	38	4	1	1	0	1	0	0
65	2	31.8931	89	107	17	100	37.17	21	3.2	6.5625	7.4	138	9.7	14.3	142	4.2	1.3	15.2	185	24.9	1.4	0.6	395	418	1.7	482.686	0	0	0	1	0	1	0	0	0	1	0	0	0	3	27	25	15	9	0	0	0	0	0
47	2	16.7656	92	76	17	91	36.39	44	3.2	13.75	3	54	10.2	21	135	3.6	2.2	20.7	199	36.1	1.9	33.7	18	42	6.5	263	1	1	3	1	0	0	0	0	1	0	0	1	0	12	77	39	15	4	0	0	1	1	1
54	2	31.0208	80	161	21	100	36.67	106	3.5	30.2857	2.7	63	8.4	25.7	139	4.5	1.3	34.3	299	49.1	3.2	2.4	15	36	4.5	629	1	1	3	1	0	1	1	0	0	0	1	1	0	15	67	45	7	10	0	0	1	1	1
40	2	25.3685	113	75	24	92	36.72	47	3.3	14.2424	18.6	309	8.6	16	125	5.5	2.4	29.2	204.822	55.1	2.8	12.2	23	52	2.3	219	1	1	2	0	0	0	0	1	0	0	0	1	0	8	65	31	14	5	1	0	0	1	1
68	2	24.0327	70	75	15	100	36.44	24	2.7	8.88889	18.3	245	11.9	14	130	3.3	3.21904	17.6	204.822	41.4	1.6	0.9	11	26	1.9	482.686	0	1	2	1	0	0	0	0	0	0	0	1	0	4	38	42	14	3	0	0	0	0	0
53	2	27.9549	90	90	23	96	36.67	8	4.6	1.73913	5.3	37	12.7	12.3	137	3.7	6.3	12.9	204.822	27.5	1.2	1.8	95	176	0.7	313	0	1	1	0	0	0	0	1	0	0	0	1	0	5	40	30	14	2	0	0	0	0	0
74	2	25.7099	96	107	20	100	36.06	162	3.3	49.0909	14.1	83	11	15.6	133	5.1	2.9	17.5	137	35.4	1.6	1.9	44	59	4.1	215	0	1	3	1	0	1	0	1	0	1	0	1	0	15	67	43	15	9	1	1	1	0	0
59	2	20.9042	86	75	9	91	36	21	3.6	5.83333	9.6	115	10.9	15.6	138	4.8	3.6	14.7	207	27	1.3	1.3	31	90	0.5	548	1	1	2	1	1	0	0	1	0	0	0	1	0	7	97	49	6	11	0	1	1	1	1
56	2	26.5888	98	67	22	98	36.11	101	2.2	45.9091	16.7	236	10	18.9	132	3.2	2.5	29.6	204.822	68.8	3	30.5	64	210	5.2	175	1	1	3	0	0	0	0	1	1	0	0	1	0	9	77	28	15	4	0	0	0	1	1
50	2	24.8016	100	105	23	93	36.72	10	3.9	2.5641	7.4	116	14.8	12.3	138	4.2	1.2	11.4	204.822	34.1	1.1	1.8	37	60	0.8	178	0	0	0	1	1	0	0	0	0	0	0	1	0	3	31	29	13	2	0	0	0	0	0
59	1	24.3359	108	91	25	96	37	20	3.9	5.12821	11	261	7.1	19.1	137	3.9	1.9	14.9	204.822	30.7	1.4	0.8	18	31	0.6	371	1	0	0	0	1	0	0	0	1	1	0	1	0	1	30	34	14	4	0	0	0	1	1
59	1	21.4399	109	64	22	86	36.89	15	3.3	4.54545	10.4	72	7.4	15.1	130	3.1	2.9	30.9	155	52.9	2.8	13.6	26	39	0.7	233	0	1	2	1	0	0	0	1	0	0	0	1	0	8	57	35	14	4	1	0	1	1	0
61	2	30.1414	87	51	19	100	37.67	62	2.4	25.8333	12.4	74	7.1	23.7	145	5.4	5.2	47.2	204.822	150	4.7	17.7	24	59	1.6	490	0	1	3	1	0	0	1	0	0	0	0	1	0	10	95	34	10	6	1	0	1	1	1
72	1	27.4714	80	66	11	100	36.8	8	2.7	2.96296	8.5	193	7.5	15.3	141	5.1	1	15	243	25.9	1.4	0.8	14	49	0.5	579	0	1	2	1	0	1	1	1	0	1	0	0	0	4	28	34	15	7	0	0	1	0	0
55	2	27.5133	85	88	18	97	37.33	26	2.6	10	3.9	59	9.4	18.4	144	3.7	1.9	17.7	174	40.7	1.6	4.4	43	82	0.8	182	0	1	2	1	1	0	0	0	0	0	0	1	0	6	54	27	13	5	1	1	1	0	0
69	2	26.2543	51	69	14	99	36.94	30	2.6	11.5385	4.4	29	6.7	23.3	147	4.6	3.21904	16.4	175	45.2	1.5	1.2	24	39	2	204	1	1	3	1	0	0	0	0	0	0	0	1	0	11	67	33	13	9	0	1	0	1	1
47	1	20.5499	81	77	13	93	37.5	29	3.8	7.63158	8.4	58	9.7	18.8	137	3.8	1.6	20.4	154	40.6	1.9	9.4	68	327	3.6	207	0	1	3	0	0	0	0	1	0	0	0	1	1	10	62	21	15	3	0	1	0	1	0
67	2	33.4821	68	96	16	95	36.39	16	2.8	5.71429	4.3	70	11.9	13.7	135	3.7	3.21904	13.6	204.822	28.5	1.3	1	46	55	0.8	155	0	1	3	1	0	1	0	1	0	0	0	0	0	6	27	31	13	7	0	1	1	0	0
66	2	41.1352	115	82	19	95	37.61	28	2.6	10.7692	15.9	131	11.4	13.2	142	4.6	2.7	15.4	204.822	30.1	1.4	2.3	18	15	0.8	191	1	1	2	1	0	1	0	1	1	0	0	0	0	8	48	36	15	6	0	0	1	1	1
64	1	26.9097	65	76	14	100	35.56	19	2.4	7.91667	9.1	187	9	12	134	3.8	1.9	14.5	204.822	26.5	1.3	1.6	13	43	0.9	162	0	1	2	0	1	0	1	0	0	0	0	1	0	4	61	38	8	9	0	0	0	0	0
58	2	24.1993	76	69	18	99	36.17	40	3.6	11.1111	19.4	111	9.4	18.4	136	4.3	3.4	20	204.822	42.5	1.8	5.7	14	30	7	170	0	1	3	1	0	0	0	0	0	0	0	1	0	13	87	46	14	7	1	0	1	1	1
48	2	34.8994	112	85	29	87	36.89	76	3.7	20.5405	25.3	117	7	19.3	135	5.2	2.6	27.7	204.822	51.9	2.5	6.4	25	48	3.4	218	0	1	3	1	1	0	0	0	1	0	0	1	0	15	93	44	15	2	0	0	0	0	0
53	1	26.9274	82	120	13	100	35.61	36	2	18	8.6	35	9.1	12.6	113	3.2	1.3	38.7	127	46.8	3.6	20	56	158	3.3	525	1	1	3	1	0	1	0	1	0	1	0	1	0	14	69	37	13	6	1	1	1	1	1
70	2	30.7564	98	75	36	100	37.56	45	2.6	17.3077	12.3	215	6.4	17.3	139	5.1	1.6	32.1	497	35.4	3.2	1.4	21	34	1.4	369	1	1	3	1	0	1	1	0	1	0	0	1	1	6	73	39	11	12	1	1	1	1	1
58	2	44.4067	87	82	18	96	37.72	7	3.1	2.25806	4	55	9.1	19.9	142	3.6	3.21904	18.6	296	39	1.7	9.1	15	51	0.5	186	0	1	3	0	0	0	0	1	1	0	0	1	0	6	35	23	15	4	0	1	0	0	0
66	1	37.688	39	57	11	71	36.5	65	4.4	14.7727	17.3	190	8.6	14	131	5.2	1.9	21.4	180	41.1	2	6.2	22	56	4.9	312	1	1	3	0	1	0	0	0	0	1	0	1	0	17	79	40	12	6	0	0	1	1	1
73	2	41.0998	105	65	29	91	37.39	43	2.8	15.3571	17	184	12.2	16.4	139	4.3	0.9	12.7	204.822	31.2	1.2	1.5	139	225	1.7	248	0	1	3	1	0	0	1	0	1	1	1	0	0	5	52	33	14	12	0	0	1	0	0
42	2	23.858	89	112	15	100	36.5	7	2.5	2.8	5.3	103	10.8	17.8	140	3.5	1.1	15.8	301	31.8	1.5	2.7	16	77	0.5	255	0	1	2	1	1	0	0	1	0	0	0	0	1	4	20	34	15	3	1	0	1	0	0
68	1	33.5068	135	70	29	95	36.56	95	2.9	32.7586	15.7	241	8.6	17	141	5.5	1.4	21.4	204.822	43.2	2	1.5	12	27	4.3	192	0	1	3	1	0	1	1	0	0	0	1	0	0	8	53	24	15	9	0	0	0	1	0
46	2	33.471	111	93	0	98	37	17	3.2	5.3125	6.4	89	7.6	16.6	143	4.8	3.5	17.4	187	43.9	1.6	6.8	923	6261	1	792	1	1	3	0	0	0	1	0	0	0	0	0	0	9	68	34	15	4	0	1	1	1	1
64	2	28.4879	78	142	14	100	36.22	5	2.1	2.38095	5	81	12.9	14	137	4.1	3.21904	15.9	204.822	36.2	1.5	1.2	12	25	0.5	243	0	1	2	1	1	0	0	0	1	0	0	0	0	3	20	32	15	6	0	0	1	1	0
53	2	27.7423	96	76	14	95	36.56	49	3.6	13.6111	4	38	8.9	22.8	134	3.5	2.4	21.1	195	28	1.9	2.3	82	171	2.1	581	1	1	3	1	1	0	0	1	0	0	0	1	0	10	69	33	13	5	0	0	1	1	1
40	1	26.5731	80	77	18	95	36.5	16	4.3	3.72093	11.7	61	7	19	146	2.7	2.3	27.4	204.822	39.5	2.5	22.9	29	194	1.5	176	1	1	2	1	0	0	0	1	1	0	0	1	0	11	79	35	7	3	0	0	1	1	1
67	1	43.3689	164	65	27	96	36.83	60	4.1	14.6341	10.7	37	8.3	23	149	4.6	1.1	27.9	97	28.3	2.6	5.1	27	59	1.8	588	1	1	3	1	0	1	1	0	1	1	1	1	0	17	84	47	7	11	1	1	1	1	1
53	2	24.8016	74	103	27	89	36.94	59	4.1	14.3902	6.8	112	9	16.1	138	4.3	3.1	17.4	204.822	43.5	1.6	5.2	47	105	1.4	270	1	1	2	1	0	0	0	0	0	0	0	1	1	7	43	25	15	12	0	0	1	1	1
64	1	36.8512	74	76	22	99	36.56	11	2.6	4.23077	12.3	88	12.1	15.4	142	2.9	5.5	16.5	204.822	36.2	1.5	4.8	54	186	0.9	447	0	1	3	1	1	0	0	0	0	0	0	0	0	12	67	36	3	4	0	1	1	1	1
45	1	19.6046	71	63	11	100	36.56	53	3.7	14.3243	6.6	129	4.8	19.9	133	2.9	1.8	21.1	279	34	2	12	71	92	1.5	124	0	0	0	1	1	0	0	0	0	0	0	1	0	8	59	22	14	3	0	0	1	0	0
48	2	36.6975	108	77	19	98	37	39	3	13	10.1	70	7.7	18.2	128	3.5	1.5	31.7	123	59.8	2.9	18.1	44	62	1	163	1	1	2	1	0	0	0	0	0	0	0	1	0	7	53	25	15	3	1	0	1	1	1
53	2	43.8988	85	84	19	94	36.61	17	2.5	6.8	19.3	157	9.1	14.7	126	4.8	2.1	26.9	204.822	33.4	2.6	2	70	52	1.4	149	0	1	2	1	1	1	0	0	0	1	0	0	0	5	41	23	15	3	0	0	0	0	0
59	2	26.0617	117	61	23	100	36.33	10	1.7	5.88235	13.6	77	8.7	15.5	141	4.6	13.6	25.3	83	55.8	2.3	2.2	19	58	0.8	283	1	1	3	1	1	1	0	1	0	0	0	1	0	11	69	40	15	5	1	1	1	1	1
67	2	23.9901	90	82	34	100	36.67	68	3.6	18.8889	9.5	65	8.5	17	140	5.5	1.7	16.8	204.822	62.2	1.5	0.6	4	24	8.9	255	0	1	3	1	0	0	1	0	0	0	0	0	0	10	66	36	15	6	0	0	0	1	0
62	1	40.3194	134	131	24	92	36.44	46	2.5	18.4	8.7	177	11.1	16.2	140	4.5	7.8	32.6	408	37.8	3	2.6	19	42	2.3	276	1	1	2	1	0	0	0	0	0	0	0	1	0	14	101	51	13	9	1	0	1	1	1
47	1	17.184	82	50	17	92	36	32	2.9	11.0345	19.8	91	5.6	21.5	137	2.9	2.6	21	139	40.4	1.9	3.7	18	41	5.8	349	0	1	3	1	0	0	0	0	1	0	0	1	0	16	55	30	14	5	1	1	1	1	1
46	2	32.7837	118	81	22	96	37.39	47	2.9	16.2069	13.1	39	9.6	15.7	140	4.7	6.8	27	201	31.3	2.5	6.5	5231	28275	4.5	16360	1	1	3	1	0	0	0	0	0	0	0	1	0	16	68	32	15	1	1	0	0	1	1
63	2	23.642	94	86	15	100	36.78	67	2.8	23.9286	13.6	119	5.4	16.1	140	4	1.7	12.6	589	27.3	1.2	0.7	17	25	2.6	319	0	1	3	1	0	1	1	1	1	0	0	0	0	6	38	35	15	13	0	0	1	0	0
71	2	38.7543	66	64	18	99	37.83	29	3.4	8.52941	3.5	66	9.3	14.5	143	5.6	4	20	152	45.8	1.8	0.9	3820	89	1.8	25010	0	1	3	1	0	0	0	1	0	0	1	0	0	10	55	44	14	7	0	0	0	0	0
51	2	40.1384	74	89	9	90	36.56	18	3.1	5.80645	5.3	128	13.9	13.2	134	4.4	1.4	15.2	204.822	46.3	1.4	1.1	57	82	1	482.686	0	1	2	1	1	1	1	0	0	0	0	0	0	3	20	13	15	5	0	0	0	0	0
62	2	23.8062	88	73	21	91	36.72	5	2.4	2.08333	11.1	98	11.6	18.7	136	3.8	2.4	43.9	199	42.7	4	4.8	20	58	0.5	451	0	1	3	1	0	0	0	1	1	0	0	1	0	5	60	28	15	5	0	0	1	1	1
73	2	26.6065	80	89	18	96	38.39	24	2.4	10	14.1	150	7.5	16.9	138	4.1	1.8	19.1	300	32.8	1.7	0.3	3	20	5.2	270	0	1	3	1	0	0	1	1	0	1	0	0	0	14	96	54	4	8	0	0	1	0	0
70	1	32.3484	85	70	23	96	36.5	52	1.9	27.3684	22.4	350	8.6	16.2	131	4.2	3.21904	17.1	204.822	31.3	1.5	3.6	131	205	5.5	232	0	1	3	1	1	0	0	0	0	0	0	0	0	8	77	30	14	9	0	0	1	1	1
55	2	33.0122	88	74	30	90	37.11	34	3.9	8.71795	7	149	8.3	17	135	4.7	3.21904	65.8	350	67.9	5.8	2.1	20	39	1.4	334	0	1	3	1	1	0	1	0	0	1	0	0	0	7	46	24	12	6	1	0	0	0	0
67	2	25.9177	86	83	14	100	36.94	12	3.2	3.75	5.8	63	7.7	12.4	133	5	3.1	19.4	167	77.7	1.8	0.9	44	68	0.6	254	0	1	2	0	1	0	0	1	0	0	0	1	0	6	40	47	14	7	0	0	0	1	0
36	2	31.1791	111	110	18	99	37.39	12	2.4	5	6.4	90	8.3	21.1	133	3.6	1.3	17.7	160	47.4	1.6	50.8	114	156	0.6	482.686	1	1	2	0	0	0	0	1	0	0	0	1	0	12	69	45	10	3	0	0	1	1	1
41	1	37.9297	100	65	15	100	36.78	8	2.8	2.85714	23.3	190	7.6	17.7	136	4.4	14.7	27.8	123	55.2	2.5	8.6	30	124	2.5	160	1	1	3	1	0	0	0	0	0	0	0	1	0	14	121	49	3	4	0	0	0	1	1
56	2	27.0694	95	85	24	94	37.17	18	3.9	4.61538	13.9	41	9	19	136	4.5	4.8	23	204.822	29	2.1	1.8	163	586	1.1	383	0	1	2	1	0	1	0	1	1	0	0	1	0	7	38	32	14	5	0	0	0	0	0
56	2	37.7693	121	55	35	98	37.5	28	3.7	7.56757	12.1	165	7.9	19.3	131	3.7	6	29.3	99	73.9	2.7	12.9	23	68	2.4	210	1	1	3	0	1	0	0	1	0	1	0	1	1	12	102	44	15	4	1	0	1	1	1
63	2	24.8016	87	104	20	100	36.78	53	3	17.6667	9.8	157	9.6	13.8	138	4.7	0.8	14.6	204.822	35.7	1.3	0.3	33	53	2.6	280	0	1	1	1	0	1	1	0	1	0	0	0	0	6	53	31	12	11	0	0	0	1	0
69	2	30.4705	96	134	17	93	36.44	23	3.9	5.89744	10.2	198	9.7	17.6	134	5.4	2.6	12.6	204.822	30.4	1.2	1.9	93	243	1.5	607	1	1	1	1	1	0	0	1	1	0	1	1	0	5	43	21	15	8	0	0	1	1	1
57	1	25.9701	128	64	18	99	36.61	16	2.9	5.51724	7	70	12.9	20	148	4.5	11.6	23.3	85	45.2	2.1	16.4	81	411	1.1	214	1	1	3	1	1	0	0	1	0	0	0	0	0	12	67	34	15	4	1	1	1	1	1
50	2	24.5536	103	75	13	100	37	93	4.2	22.1429	15.2	104	8.6	16.9	138	3.4	1.6	14	192	38.9	1.3	2.4	9	142	3.2	601	1	1	3	1	0	0	0	0	0	0	0	1	0	14	115	50	3	6	0	0	0	1	1
28	1	18.6366	116	89	15	94	36.56	7	3.1	2.25806	6.4	58	6.7	23.1	141	3.9	2.7	18.2	204.822	42.1	1.7	12.9	39	445	0.4	336	0	1	2	1	0	0	0	1	1	0	0	1	0	7	48	26	13	3	1	0	0	0	0
75	2	37.663	96	83	37	98	36.61	23	2.9	7.93103	8.9	237	8.2	17.1	136	4.2	2.6	20.5	204.822	37.8	1.9	1.2	11	28	0.9	627	0	1	1	1	0	1	1	0	0	1	1	0	0	4	39	32	14	8	0	0	1	1	1
59	2	29.5848	80	66	21	99	36.78	109	3.2	34.0625	12.5	165	10.9	18.8	143	3.4	1.3	19	204.822	44.2	1.7	28.2	50	51	12.9	188	0	1	3	0	1	1	0	1	1	1	0	1	0	11	81	37	13	6	0	0	0	1	0
72	1	16.3336	73	65	23	95	37	85	4.6	18.4783	21.5	78	8.2	19.3	126	5.3	3.7	16.5	204.822	33.2	1.5	4.1	40	90	1.8	217	1	1	2	1	0	1	0	0	0	0	0	1	0	10	80	32	14	7	0	0	0	1	1
67	1	26.7401	117	68	23	96	36.89	37	3.3	11.2121	8.9	68	7.9	21.3	140	4.6	9.6	19.4	293	50.3	1.8	2.5	11	23	3.1	177	0	1	3	1	0	1	0	1	0	0	0	0	0	7	88	42	15	10	0	0	0	1	0
61	2	30.4705	80	71	18	96	35.89	61	1.4	43.5714	21	58	7.9	19.2	139	3.3	2.6	17	133	40.2	1.5	2	33	128	3.2	335	0	1	2	1	0	0	1	0	1	1	0	1	0	11	71	32	14	8	0	0	1	0	0
42	2	28.1286	133	95	40	98	36.5	24	2.6	9.23077	6.6	127	14.3	13.9	119	3.9	6.4	12.3	217	27.5	1.1	4.5	129	424	2.1	608	0	1	3	1	0	0	0	0	0	0	0	1	0	19	152	62	3	4	1	1	0	0	0
71	2	29.9308	104	83	23	96	36.78	22	2.8	7.85714	10.4	240	10.9	17.4	136	4.2	1.8	12.7	204.822	35.7	1.2	0.4	17	22	1.1	212	0	1	2	1	0	1	0	0	1	1	0	0	0	1	52	29	15	14	0	0	0	1	0
56	1	30.303	66	84	25	96	37.28	73	2.8	26.0714	43	177	7.6	21.8	156	4	1	19.5	423	39.8	1.8	14.8	64	139	1.6	290	0	1	3	1	0	0	0	1	1	0	0	1	0	20	119	56	4	6	0	0	1	1	1
57	2	24.5181	118	112	24	95	36.5	38	3.8	10	10.4	168	10.6	16.7	128	4	3.21904	18.2	204.822	33.8	1.7	11.7	33	60	0.8	304	1	1	2	1	0	1	0	0	1	0	0	1	0	5	53	37	14	5	1	0	1	1	1
64	1	24.1635	95	68	13	93	37.33	57	2.7	21.1111	5.9	68	7.7	19	132	6.6	2.2	29.8	175	48.8	2.7	19.8	71	227	3.3	825	0	1	2	1	1	0	0	1	1	1	0	1	0	15	66	38	15	6	0	0	0	0	0
60	2	33.4124	67	67	14	100	37.22	33	2.3	14.3478	7.9	110	7.6	17.2	113	4	2.9	35.1	118	61.7	3.2	22.6	122	347	3.1	616	0	1	3	1	0	0	0	0	0	0	0	1	0	15	106	42	15	7	0	0	0	1	0
71	1	25.5811	110	76	17	91	37.44	19	2.6	7.30769	9.8	53	9.6	24	137	3.9	2.9	23.1	55	40.4	2.2	11.8	33	52	0.4	194	0	1	3	1	1	0	0	0	0	0	0	0	0	7	49	33	15	4	1	1	1	1	1
31	2	32.0376	73	59	20	91	37.11	20	3.8	5.26316	12.8	29	6.9	18.9	136	3.8	1.8	27.5	89	48.9	2.5	19.7	68	167	1.9	522	1	1	3	1	0	0	0	1	1	0	0	1	0	20	99	37	3	3	1	0	1	1	1
77	1	22.1443	66	75	19	100	36.28	17	3.1	5.48387	7	201	7.9	18.6	137	4.1	2.6	26.6	291	36.2	2.4	10.1	40	76	0.7	218	1	1	2	0	0	0	0	0	0	1	0	1	0	11	55	39	15	6	1	0	1	1	1
73	2	35.8915	90	75	12	99	37.11	15	3.6	4.16667	12.2	91	9.6	14.7	136	4	1.8	20.3	156	34	1.9	2.3	21	60	0.7	355	0	1	2	0	0	1	1	0	0	1	0	0	0	9	41	30	15	6	0	0	0	0	0
66	2	24.4473	75	46	16	96	36.72	102	2.9	35.1724	4.6	173	7.5	15.3	118	5.8	1.7	13.9	204.822	41	1.3	3.7	34	41	1.7	217	0	1	1	0	0	1	0	0	0	0	0	1	0	3	60	26	14	9	0	0	0	0	0
53	2	28.9633	72	82	14	100	36.28	26	2.5	10.4	12.7	123	11.2	18.5	135	4.4	3.1	23.7	195	38.4	2.3	6.3	1086	1609	1.1	482.686	0	1	3	0	0	0	0	0	0	0	0	0	0	10	43	33	15	6	1	0	0	0	0
67	2	32.0847	110	65	18	99	36.17	42	1.9	22.1053	16.7	127	9.8	18.3	148	3.9	2.4	14.9	203	34.3	1.4	1.9	59	223	2.5	527	0	1	3	1	1	0	1	0	1	0	0	0	0	8	62	39	15	9	0	0	1	0	0
31	1	19.3205	101	60	25	92	38.11	54	2.4	22.5	37.7	126	6.2	20	139	3.4	1.8	24.9	206	41.2	2.3	14.3	40	136	1.8	298	1	1	3	1	0	0	0	1	0	0	0	1	0	13	94	35	11	3	1	1	1	1	1
62	1	27.8896	102	70	22	98	35.39	121	3.9	31.0256	5.7	86	11	19.4	142	5.4	1.1	19.5	204.822	44.1	1.8	0.7	6	15	7.2	287	0	1	3	0	0	0	1	0	0	0	0	1	0	7	64	33	15	6	0	0	1	0	0
44	2	35.0272	113	47	22	100	36.22	48	1.9	25.2632	8.6	114	7.1	13.7	129	4.5	3	11.1	532	50.1	1	2.4	90	300	5.3	1611	0	1	3	1	0	0	0	1	1	0	0	1	0	17	114	44	15	4	0	0	1	1	1
65	1	34.4034	69	57	14	93	36.67	130	4.8	27.0833	16.3	73	5.7	22.5	133	5	5.5	26	63	50.2	2.4	32.3	41	78	3.9	389	0	1	3	1	0	0	0	1	0	0	0	1	1	16	86	34	14	5	1	1	1	1	1
29	2	45.3751	121	83	26	96	37.11	24	2.8	8.57143	4.4	51	10.3	19.6	133	4.7	4.6	20	204.822	40	2	3.5	42	154	0.7	763	0	1	2	1	0	0	0	0	0	0	0	1	1	8	47	39	14	6	0	1	1	1	1
52	1	25.4557	96	107	18	100	37.39	3	4.2	0.714286	5.9	108	9.8	16.4	139	4	0.9	11.2	204.822	27.6	1	0.9	42	177	0.6	482.686	0	1	2	1	1	0	0	0	0	0	0	0	0	1	21	26	15	3	1	1	1	0	0
64	2	36.6986	97	82	17	99	36.28	133	3.7	35.9459	18.9	225	9.3	15.3	136	4.3	2.8	22	186	40.9	2	3	10	19	4	109	0	1	3	0	0	1	1	1	1	1	0	1	0	8	52	37	14	10	0	0	1	1	1
30	2	25.5102	102	94	18	94	36.78	110	3.2	34.375	32.3	187	7.6	21.7	132	3.6	1.8	26.5	200	41.1	2.4	39.4	40	103	5.6	301	1	1	3	1	0	0	0	1	0	0	0	1	0	8	67	27	15	3	0	0	0	1	1
75	2	37.7338	80	97	11	98	36.61	14	2.7	5.18519	6	132	12.2	15	141	3.5	2.1	13.9	204.822	28.4	1.3	2.3	50	117	0.9	243	0	1	2	1	1	1	0	1	1	1	0	0	0	4	32	27	14	6	0	0	1	0	0
45	2	46.0208	113	59	37	95	37.22	23	2.8	8.21429	9.8	71	10.2	17.7	128	3.4	18	50	128	61.5	4.5	17	71	150	2.4	309	0	1	3	1	0	0	0	1	0	0	0	1	0	13	99	44	15	3	0	0	1	1	1
48	2	23.3796	101	50	16	100	37.89	17	2.5	6.8	19.8	149	9.9	17.5	137	4.4	6.5	22.7	193	44.2	2.1	9.5	3398	4327	0.9	208	0	1	1	1	0	0	0	1	0	1	0	0	0	9	50	28	15	2	0	0	0	0	0
62	2	31.7418	92	62	14	100	36.22	30	2.5	12	9.2	128	8.8	16.1	137	2.7	1.4	18.2	204.822	39.4	1.7	3.2	19	35	2	272	0	1	1	1	1	0	0	0	0	0	0	0	0	6	50	30	15	5	1	1	1	0	0
33	1	30.0814	107	78	16	92	36.56	45	2.3	19.5652	8.4	53	7.2	15.6	138	2.7	2.5	15.9	183	33.7	1.5	3.8	28	96	4.3	300	1	1	2	1	0	0	0	0	1	0	0	0	0	16	73	28	15	7	1	1	1	1	1
59	2	21.3503	81	81	11	93	36.33	31	3.4	9.11765	7	62	8.6	16.6	129	5.3	2.2	22.4	105	63.3	2	8.5	21	36	1	188	1	1	2	1	0	0	0	1	1	0	0	1	0	9	71	26	15	4	0	0	0	1	1
63	1	48.8021	100	79	26	89	39.61	54	2.1	25.7143	26	312	8.5	21.2	140	5.6	1.8	20.4	879	38.4	1.9	10.8	20	98	3.3	503	0	1	3	1	0	1	0	0	1	0	0	0	0	14	97	49	15	5	1	0	1	0	0
54	1	19.3452	95	121	9	99	37.17	11	2.4	4.58333	4.5	181	11.1	13.9	134	4.1	0.8	14	204.822	23.8	1.2	0.4	10	18	0.5	164	0	1	1	1	0	0	0	0	0	0	0	0	0	1	20	37	15	2	0	0	0	0	0
73	2	21.6263	42	68	20	93	36.33	70	2.7	25.9259	23.2	169	9.1	20.5	140	3.9	1.6	18.5	247	43.4	1.7	1.1	17	43	2.6	274	0	1	3	1	0	0	1	0	1	1	0	0	0	4	70	42	15	7	0	0	1	1	1
43	1	27.9688	98	79	18	100	37.11	24	3.3	7.27273	22.3	154	7.4	19.1	141	3.9	1.9	27.4	195	32	2.5	18.4	48	111	1.4	222	1	1	3	1	1	0	0	1	0	1	0	1	0	15	95	44	5	3	1	1	1	1	1
43	2	21.9038	104	96	18	100	36.44	7	2.7	2.59259	18	138	6.4	14.6	118	2.4	2.8	25	153	34.5	2.3	16.1	42	134	0.9	233	0	1	3	1	0	0	0	1	0	0	0	1	0	12	44	29	15	3	1	0	1	1	1
56	2	34.9897	86	109	17	99	36.67	10	2.4	4.16667	8.1	108	10.2	18	145	3.9	0.9	18.4	228	50.9	1.7	7.7	696	1034	0.5	409	1	1	2	1	1	1	0	0	0	0	0	0	0	9	46	26	15	7	0	1	0	1	1
47	2	36.4198	66	117	20	100	37.61	20	3.4	5.88235	12.1	209	13.8	12.4	134	3.8	1	14.3	204.822	29.2	1.3	1.7	95	62	0.9	266	0	1	3	1	0	0	0	0	0	0	0	0	0	1	35	26	15	4	0	0	0	0	0
69	2	60.2324	83	76	13	99	36.61	83	3	27.6667	9	134	7.1	17.3	136	5.7	5.4	11.2	596	28	1	0.2	39	141	4.7	246	0	1	2	1	0	1	0	0	0	0	0	1	0	6	61	32	15	8	0	0	1	0	0
75	1	38.9031	75	88	20	100	36.83	69	3.5	19.7143	10.1	210	7.6	17.2	141	4.1	1.4	18.6	204.822	35.1	1.7	0.4	10	20	2.7	249	0	1	1	0	0	0	1	0	0	1	0	0	0	3	52	28	15	8	0	0	0	0	0
76	1	18.5658	115	78	20	100	36.06	24	2.1	11.4286	12.1	77	7.1	17.4	147	5.7	9.7	20	204.822	40	2	1.3	27	48	1.3	264	1	1	2	1	0	1	0	0	0	0	0	1	1	13	79	44	15	9	1	1	1	1	1
67	2	33.0097	123	101	29	94	36.56	29	2.3	12.6087	13.6	205	12.1	13	149	3.3	1.9	14.9	204.822	29.6	1.4	2	24	44	0.9	797	0	1	2	0	1	0	0	0	1	1	0	1	0	3	53	33	13	6	0	0	0	0	0
61	2	41.0466	70	77	18	98	39.28	29	2.4	12.0833	10.7	112	8.6	15.6	136	5	2	18.3	261	41.6	1.7	0.5	39	53	1.4	279	0	1	2	1	0	1	0	0	0	1	0	0	0	6	39	26	15	8	0	0	0	0	0
65	2	19.5776	88	50	19	97	36.72	30	3.5	8.57143	1.7	92	8.7	15.6	146	4.5	7.4	18.7	157	42.4	1.7	7.1	1143	3030	1.2	1554	0	1	1	0	0	0	0	0	0	0	0	0	0	11	64	23	15	11	1	1	1	0	0
64	2	28.7698	89	96	24	89	37.11	11	3.7	2.97297	5.3	170	10.3	13.3	145	3.4	3.21904	13.4	204.822	29.1	1.2	18	11	12	0.7	482.686	0	1	2	0	1	0	0	0	1	1	0	0	0	6	38	32	10	4	0	0	0	0	0
73	2	41.2415	47	66	17	94	36.61	185	3.1	59.6774	10	173	7.7	15.1	134	5.8	1.4	13.4	204.822	30.9	1.2	0.2	11	13	5.4	482.686	0	1	3	0	0	1	1	0	0	1	0	0	0	5	73	30	15	10	0	0	1	0	0
62	2	32.4992	57	85	14	96	36.33	40	1.6	25	17.3	97	12.8	19	136	5.2	2	19.3	102	48	1.8	1.8	41	55	0.9	302	1	1	2	0	1	0	0	1	0	1	0	1	0	9	54	46	14	8	0	0	1	1	1
51	1	30.7185	96	90	20	99	37.17	36	2.9	12.4138	6.5	23	10.3	18.1	138	4	1.5	20.2	144	34.7	1.9	10.2	1572	2325	0.8	384	1	1	2	1	0	0	0	0	0	0	0	1	0	10	57	28	15	4	1	1	0	1	1
34	1	25.333	93	71	13	98	37.06	14	2.7	5.18519	15.8	22	8.1	14	135	4.4	4.6	30.9	261	49.7	2.8	15.9	7	28	1.9	189	0	1	3	1	0	1	0	0	1	0	0	1	0	14	87	45	15	4	1	1	1	1	1
45	1	22.2506	108	78	18	100	36.89	42	1.9	22.1053	18	173	6.9	22.6	127	4.4	1.8	15.4	272	25.2	1.4	2.2	7	8	1.1	112	0	0	0	1	0	1	0	0	1	0	0	1	0	5	58	25	15	4	0	0	1	0	0
53	2	22.7244	83	78	23	100	37.17	19	3.2	5.9375	28.6	415	9.2	15.9	135	5.1	2.6	14.6	352	41	1.3	0.6	58	86	0.6	364	0	0	0	0	0	1	1	1	0	1	0	1	0	2	31	18	15	4	0	0	0	0	0
56	2	31.39	76	74	20	99	35.72	10	2.7	3.7037	6.9	88	6.4	19.9	137	3.6	3.2	17.3	183	34.9	1.5	2.9	17	39	0.7	292	1	1	2	0	1	0	0	0	0	0	0	1	0	8	32	35	15	10	0	1	1	1	1
66	1	34.7656	101	82	13	100	36.83	51	2.6	19.6154	10.5	68	7.6	15.7	139	4.2	4.5	25	133	101.7	2.3	9.9	406	508	2.1	482.686	1	1	3	0	0	1	0	0	0	0	0	1	0	16	94	46	14	9	0	1	0	1	1
60	1	32.2421	98	67	18	100	37	48	2.8	17.1429	9.8	47	6.8	15.9	137	3.8	2.2	18.1	62	41.6	1.6	4.2	192	317	0.8	625	0	1	2	1	0	1	0	0	1	0	0	0	0	7	54	24	14	6	1	0	1	1	0
68	2	35.6677	100	75	18	100	36.94	57	2.4	23.75	15.4	46	7	25.6	145	4.2	3.21904	17.7	204.822	85.1	1.6	9.9	202	204	2.3	867	0	1	2	0	0	0	0	0	0	0	0	0	0	12	91	47	7	7	0	0	1	1	1
73	1	38.7968	110	101	36	97	36.89	18	2.4	7.5	9.4	143	12.7	13.6	142	2.9	3.21904	12.4	578	29.1	1.1	0.3	12	26	0.7	238	0	1	1	1	1	0	0	0	1	1	1	0	0	7	43	47	14	5	0	0	0	0	0
68	1	30.013	122	90	18	99	36.94	127	2.4	52.9167	43.6	70	16.1	15.3	126	4.3	2.4	22.7	204.822	52.8	2.1	2.5	23	35	2	521	0	1	1	1	0	0	1	0	0	0	0	0	0	11	73	31	15	4	0	0	1	0	0
58	1	40.3912	52	76	17	98	36.61	40	3.6	11.1111	10.3	161	13.5	18.2	133	4.9	2	17.7	204.822	50	1.6	2.3	17	30	1.6	377	0	1	3	0	0	0	1	0	0	0	0	1	0	5	54	24	13	6	0	0	0	0	0
45	2	26.0044	120	51	22	96	36	20	2.7	7.40741	7.4	168	9.6	24.3	136	3.4	8.8	53	293	51.1	6	8.2	1365	4792	2.6	2532	0	1	3	1	0	0	0	0	0	0	0	1	1	7	78	33	15	3	1	1	1	1	1
73	1	29.0947	107	109	23	99	36.33	79	3.1	25.4839	9.2	276	7.3	13.9	139	5.3	1.1	20	204.822	40	2	0.3	12	37	5.7	244	0	1	1	0	0	1	1	1	0	1	0	0	0	5	43	24	15	10	0	0	0	1	0
71	1	26.8566	63	60	18	99	36.56	41	3	13.6667	5.4	117	7.2	23.5	129	4.3	2.5	22.2	153	30.2	2	2.6	16	22	2.8	304	0	1	2	1	0	1	1	1	0	0	0	0	0	9	56	26	15	12	0	0	1	1	1
63	2	41.5958	92	96	18	98	37.22	27	2.6	10.3846	5.4	39	8.9	19.1	144	4.1	1.4	16.8	204.822	28.4	1.5	8	136	501	0.8	382	1	1	3	1	1	0	0	0	1	0	0	1	1	12	65	45	7	6	0	0	0	1	1
63	2	28.0258	75	86	29	100	36.44	46	3.3	13.9394	15.9	110	10.2	18.3	131	5	2.8	27.4	157	63.7	2.6	18.2	667	801	1.4	482.686	0	1	3	1	0	0	0	0	0	1	0	1	1	11	60	29	15	5	1	1	1	0	0
65	1	31.25	62	91	32	100	36.83	23	3.2	7.1875	6.2	35	6.8	16.3	146	3.4	1.2	23.8	68	32.7	2.2	12.4	33	102	0.9	310	1	1	1	0	1	0	0	1	0	1	0	1	0	9	44	27	13	5	1	1	1	1	1
68	2	32.9507	74	72	16	97	36.83	23	2.3	10	9	60	7.1	18.6	144	3.7	1.6	17.4	137	29.5	1.6	4	38	182	0.6	266	1	1	2	0	1	0	0	0	1	0	0	1	0	11	55	32	13	5	0	0	1	1	1
50	1	23.8346	87	79	32	100	36.67	17	3.8	4.47368	9	65	9.5	20.3	139	3.4	2.7	17.4	152	34.8	1.6	8.4	578	660	0.6	482.686	0	1	2	0	1	0	0	0	0	0	0	1	0	9	57	27	15	4	0	1	0	0	0
59	2	29.5493	107	105	28	94	37.11	71	2.9	24.4828	10	47	7.9	24.9	139	4.4	3.21904	30.4	80	70.6	2.7	21.4	15	41	5.1	319	0	1	3	0	0	0	0	0	1	0	0	1	1	13	67	31	13	6	0	0	0	1	0
37	1	17.0068	79	64	14	97	36.94	83	4	20.75	28.8	186	8.1	22.6	154	4.1	3.6	18.8	204.822	43.4	1.7	30.5	26	97	4.5	148	0	1	3	1	0	0	0	1	0	0	0	1	0	14	85	36	7	3	0	0	1	1	1
38	1	40.6569	101	50	17	97	36.67	20	2.1	9.52381	18	134	12.1	14.7	139	4.2	2.7	12	204.822	28.5	1.1	0.8	32	33	0.7	130	0	1	2	1	0	0	0	0	0	0	0	0	0	4	37	34	15	4	0	1	1	0	0
65	2	18.1262	89	67	21	100	36.06	14	3.2	4.375	4.7	117	7.7	19.9	148	4.4	6.8	13.3	283	36.8	1.1	1.3	17	47	2	211	0	1	2	1	1	0	0	0	1	0	0	0	0	8	69	41	8	4	0	0	0	1	0
63	2	37.663	111	58	27	96	36.56	9	2.3	3.91304	12.5	36	9.1	16.3	128	4.3	5.5	15.4	204.822	34.4	1.4	0.8	15	63	1.8	260	0	1	2	0	1	0	0	0	0	0	0	0	0	8	51	33	15	9	0	1	1	0	0
46	2	24.8016	92	73	27	95	35.33	33	3.4	9.70588	7.1	163	12	15.6	128	4.2	1.7	15.7	150	27.6	1.4	0.6	858	952	1.3	522	0	0	0	1	1	0	1	1	1	0	0	1	0	5	44	38	14	3	0	0	0	0	0
71	1	63.2422	90	71	17	0	37.06	37	4.2	8.80952	9.4	112	8.3	16.3	140	5	1.4	13.4	204.822	32.1	1.2	0.7	12	35	2.2	166	0	1	3	0	1	0	0	0	0	0	0	0	0	6	44	32	15	7	0	0	1	0	0
67	2	24.8789	80	62	28	98	36.44	16	1.9	8.42105	8.2	91	11.1	16.2	135	3.2	1.7	16.4	199	40.3	1.5	0.9	6	22	0.5	226	0	1	3	1	0	0	0	0	0	0	0	1	0	7	49	37	14	4	0	0	1	0	0
65	1	38.1323	100	84	18	100	37.39	14	2.2	6.36364	2.2	97	9.1	24.1	140	4	2.3	14.7	205	35.4	1.4	5.5	322	742	0.6	992	0	1	3	1	1	1	0	1	0	0	0	0	0	9	62	37	15	6	1	1	1	0	0
70	1	24.0999	81	67	16	100	36.06	81	4.1	19.7561	6.2	37	6.9	19.9	137	3.7	2.3	22.3	204.822	35.4	2.1	1.7	21	24	4.6	201	0	1	3	1	0	0	0	0	0	1	0	1	0	15	102	31	3	8	0	0	0	1	0
61	2	21.9376	97	75	27	100	37	37	2.8	13.2143	17.2	114	10.1	18.6	142	4.5	3.5	16	245	31	1.5	7.5	199	300	1.3	213	0	1	2	1	0	0	0	0	0	0	1	1	0	13	53	34	15	8	0	1	0	0	0
64	1	31.4323	90	99	23	97	36.33	66	3.2	20.625	27.8	234	11.8	13.7	117	4	1	16.3	290	26.8	1.5	1.3	12	10	4.3	191	0	1	2	1	1	0	0	0	0	0	0	1	0	11	59	34	13	3	0	0	0	1	0
55	1	20.5688	78	58	18	100	36.83	25	2.4	10.4167	6.6	24	7.5	19.9	135	3.5	3.5	33.8	56	72.4	3.1	6.9	11	22	2.5	202	1	1	3	1	0	0	0	1	1	0	1	1	0	14	110	43	9	7	0	0	1	1	1
50	1	23.2767	90	57	15	99	36.44	6	2.5	2.4	13.1	88	8.7	16.7	141	3.9	4.2	16.7	137	34.8	1.5	1.6	12	37	0.5	226	1	1	2	1	0	0	0	1	1	0	0	1	0	7	26	28	15	4	0	1	1	1	1
78	2	23.6332	84	64	18	100	36.83	20	3.2	6.25	4.4	83	8.8	13.6	149	3	0.6	13.2	204.822	26.4	1.2	0.4	23	50	1.6	279	0	1	2	1	1	0	0	0	1	0	0	0	0	5	42	43	15	6	0	0	0	0	0
60	2	29.5062	85	81	16	100	37	48	2.4	20	14.8	62	9.6	17.2	133	3.3	1.5	14.3	204.822	68.9	1.3	0.5	6	89	7.3	199	0	1	3	1	0	1	1	0	0	0	0	1	0	10	53	26	15	8	0	0	1	0	0
69	2	31.1614	67	78	15	99	37.78	18	3.1	5.80645	9.1	109	13.6	15.4	141	3.9	2.5	14.8	204.822	26.8	1.3	18	53	89	1.2	482.686	0	1	2	0	1	0	1	0	0	0	0	1	0	5	25	22	12	4	0	0	0	1	0
48	1	30.3288	110	77	13	98	37.28	56	3	18.6667	5.2	136	8	21.4	134	3.2	2.3	17.5	349	27.9	1.6	5.8	28	96	1.4	262	0	1	3	1	1	0	0	1	1	0	0	1	0	7	79	37	15	4	0	0	1	1	1
70	1	27.6006	72	60	18	94	36.67	14	2.1	6.66667	8.8	211	10.4	19.7	137	3.3	1.9	20	252	48.3	1.9	1.6	24	31	0.8	351	0	1	3	1	1	0	1	0	0	1	0	1	1	6	30	31	14	8	0	0	0	1	0
52	1	18.6836	94	83	23	82	36.5	15	3.4	4.41176	9.6	85	11.1	19.2	132	3.7	1.7	18.5	178	39	1.7	9.8	63	299	0.5	248	0	1	2	1	0	0	0	1	1	0	0	1	1	11	77	39	10	4	0	0	0	0	0
67	2	18.2098	48	79	12	100	35.72	24	2.4	10	6.8	143	10.7	16.8	140	4.4	3.21904	12.3	204.822	30.6	1.1	18	12	24	1	482.686	1	1	1	0	0	0	0	0	0	1	0	1	0	4	46	24	13	10	0	0	0	1	1
38	1	29.3695	109	64	16	97	36.67	15	3.1	4.83871	6.7	66	7.2	21.2	150	3.3	3.21904	26.6	204.822	114.2	2.6	14.4	36	115	1	183	0	1	3	0	0	0	0	1	0	0	0	1	1	10	56	33	9	3	0	0	1	1	1
41	2	22.8822	87	97	12	100	36.94	10	2.3	4.34783	5.8	112	10.3	21.7	139	3.3	1.6	22.2	246	35.4	2	7.2	752	1861	0.5	482.686	1	1	2	1	0	0	0	0	0	0	0	0	0	6	28	24	14	3	0	0	0	1	1
68	2	22.4	100	90	19	100	37.83	70	4.9	14.2857	3.8	52	7.5	17.6	146	3.8	3.9	24	136	38.6	2.2	4.3	31	33	1.7	180	1	1	3	1	0	1	0	1	0	0	0	1	0	9	62	40	15	9	1	1	1	1	1
70	2	36.6115	94	54	19	97	36.5	93	2.4	38.75	16.3	38	7.5	21	129	3.9	1.8	25.5	125	55.3	2.4	9.4	32	28	2.4	248	0	1	3	1	0	0	0	0	1	0	1	1	0	12	80	22	15	7	1	1	1	1	1
56	2	27.0337	94	64	22	98	36.44	57	2.7	21.1111	4.7	49	10.4	20.9	126	4.1	3.2	37.3	113	73.8	3.5	41.6	67	181	0.9	482.686	0	1	3	1	0	1	0	0	1	0	0	1	1	9	81	33	13	5	1	1	1	1	1
51	2	39.654	64	64	13	97	36.39	96	2.8	34.2857	5.5	85	9.8	24.7	130	7.7	2.1	43.9	187	99.1	3.9	52.2	57	239	6	1559	0	1	3	1	0	0	0	1	0	0	0	1	1	12	78	31	14	7	0	0	1	1	1
58	2	21.0459	74	91	20	95	36.28	19	2.8	6.78571	10.4	170	9.6	12.9	134	4.1	3.21904	18.2	204.822	31.7	1.6	5.6	127	100	0.8	482.686	0	1	2	0	0	0	0	0	0	0	0	1	0	4	38	26	13	5	0	0	1	0	0
49	1	28.7553	110	90	24	95	37	85	2.5	34	14.1	102	10	19.9	133	4.4	2.7	22.4	204.822	28.1	2	27.9	113	460	1.4	915	0	1	1	1	0	1	0	1	1	0	0	1	0	10	90	31	9	2	0	0	1	1	1
42	1	52.6749	82	97	20	97	36.78	66	3.2	20.625	13.3	28	7.7	22.7	130	5.3	4.1	17.9	137	52.1	1.7	20.6	22	49	4.2	325	0	1	3	1	0	0	0	0	0	0	0	1	0	15	101	34	15	4	1	1	1	1	1
38	2	25.2301	80	88	15	100	36.56	17	3.2	5.3125	7.1	72	6.4	18.7	127	6.5	3.2	45.6	72	75.5	4.2	8.9	21	47	0.6	220	1	1	1	0	0	0	0	1	0	0	0	1	0	10	37	23	15	3	0	0	0	1	1
61	1	23.7387	96	88	22	96	39.28	12	2.4	5	3.2	19	7.2	16.8	138	4	1.9	19.5	152	39.8	1.8	3.4	17	54	0.6	235	1	0	0	1	1	0	0	0	0	0	0	1	0	11	40	38	14	6	0	0	1	1	1
77	2	24.8016	124	90	32	94	36.39	56	2.6	21.5385	9.8	152	7.1	19.9	138	3.6	2.2	18.5	151	29.7	1.7	1.1	16	19	1.2	238	0	1	3	1	0	1	0	0	1	1	0	0	0	8	53	53	13	6	0	0	1	1	1
63	1	23.2781	60	120	15	100	36.61	39	3.6	10.8333	5.9	245	8.4	21.4	151	4.2	3.21904	20.1	204.822	121.1	1.9	1.6	30	40	1.7	292	0	1	2	0	0	0	0	1	0	0	0	1	0	6	61	28	8	6	0	0	0	1	0
65	2	17.7372	175	66	36	98	36.67	21	2.4	8.75	12.5	136	5.7	13.9	136	4.9	10.6	27.6	220	58.6	2.6	4.9	31	60	1	167	0	1	3	1	1	0	0	0	1	1	0	1	0	7	75	35	13	6	1	1	1	1	1
74	2	29.4136	84	62	19	97	36.94	49	2.7	18.1481	8.4	101	11.3	15.3	131	5.4	2.8	28.8	206	42.9	2.6	2.5	35	35	1.7	228	0	1	2	1	0	0	0	1	1	1	1	1	0	5	37	20	15	7	0	0	1	0	0
65	1	32.4434	102	104	25	99	36.17	19	2.4	7.91667	7.2	106	7.5	16	138	3.8	1.6	15.8	231	30	1.5	0.6	65	90	3	200	0	1	3	1	0	1	1	1	0	1	1	0	0	13	54	47	15	12	0	0	1	0	0
48	2	20.8725	123	81	26	89	36.72	24	2.5	9.6	13.4	80	11.9	18.5	131	4.6	2	21.7	204.822	34.9	2	2.9	57	125	0.9	390	0	1	1	1	0	0	0	0	1	0	0	0	0	9	73	32	15	11	1	0	1	0	0
61	2	34.0866	87	116	24	92	38.56	54	3	18	17.6	156	12.6	16.2	150	3	2.9	17.6	204.822	24.9	1.6	0.9	203	912	3	1725	0	1	1	1	1	1	0	0	1	0	0	1	0	9	91	36	3	4	0	0	1	0	0
56	2	35.9184	104	86	18	98	38.28	45	3.3	13.6364	7.3	20	12.8	17.2	137	4.7	1.6	14.3	246	42.9	1.3	1.6	43	127	2.1	389	0	1	3	1	0	1	1	0	1	0	0	1	0	16	58	39	15	4	0	1	0	0	0
68	2	37.756	76	95	14	98	37.67	25	3.1	8.06452	10.2	147	9.6	15.7	143	4.6	1.6	28	89	45.5	2.54	2.2	1285	4211	1.4	406	0	1	3	1	0	1	0	1	0	0	0	0	0	10	73	38	15	11	0	0	1	0	0
63	2	22.5952	68	112	19	100	36.89	28	2.6	10.7692	7.6	71	12.3	16.2	139	4.7	2.1	20.5	183	36.1	1.9	19.7	164	334	0.5	265	1	1	2	0	1	1	0	1	0	0	0	1	0	4	27	31	15	6	0	0	1	1	1
53	2	24.8016	108	50	14	100	36.8	23	2	11.5	9.9	279	8.5	14	138	3.4	1	15.3	220	31.7	1.4	1.1	7	20	1.2	482.686	0	0	0	1	0	0	0	0	1	0	0	1	0	1	17	12	12	2	0	0	1	1	1
61	1	23.9361	87	80	15	100	36.89	46	1.7	27.0588	14.2	50	8.7	16.1	140	4.3	1.6	20.6	202	37.1	1.9	6.6	592	609	2.1	482.686	1	1	2	1	0	1	0	0	0	0	0	1	0	9	68	27	15	9	0	0	1	1	1
60	1	31.9559	126	111	25	95	36.94	73	3.2	22.8125	19.3	108	10.3	17.3	130	4.7	2.1	101.7	64	37.3	9.12	2	2377	5588	2.3	1171	0	1	2	1	0	0	1	0	1	0	0	1	0	10	63	43	15	5	0	0	0	0	0
58	1	21.4357	117	96	13	100	37.28	30	3.7	8.10811	11.4	61	7.5	18.2	142	3.2	2.3	20.5	204.822	35.5	1.9	0.6	16	20	1.1	194	1	1	1	0	0	1	0	1	1	0	1	1	0	2	34	21	15	7	0	0	1	1	1
51	2	40.0723	98	76	30	96	38.06	22	3.3	6.66667	4.7	32	10.2	14	144	3.4	3.21904	15.2	482	37.2	1.4	1.3	133	530	1.9	787	0	0	0	1	0	0	0	0	0	0	0	0	0	7	36	31	14	2	0	0	1	0	0
75	1	35.2167	72	58	22	99	36.61	45	2.2	20.4545	8.3	98	5.9	16.1	136	4.9	1.6	23.3	220	37.5	2.1	2.3	12	27	1.1	178	0	1	2	1	1	1	1	0	0	1	0	1	0	6	46	30	15	15	1	0	1	0	0
63	1	30.625	81	99	18	100	36.11	42	2.5	16.8	4.7	28	5.1	17.3	127	4.6	3	27.1	204.822	37.6	2.5	9.6	16	60	1	482.686	0	1	3	1	0	0	0	0	0	0	0	1	0	13	62	27	13	6	1	1	1	1	1
53	2	27.7743	119	89	22	100	36.72	20	2.3	8.69565	5.9	40	9	15	141	3.4	6	21.1	139	36.4	1.9	1.4	188	512	1.3	548	0	1	2	1	0	0	0	1	1	0	0	0	0	9	51	28	15	4	1	0	1	1	1
79	1	21.6837	62	109	26	100	36.39	25	4.1	6.09756	5.9	98	8.7	18.8	140	5.3	3	15.9	160	68	1.5	1.8	6	31	1	198	0	1	2	0	0	1	1	0	0	0	0	1	0	9	40	30	15	10	0	0	1	1	1
60	2	23.4122	78	81	16	100	36.78	37	3.1	11.9355	2.7	27	6.5	23.9	137	4.1	2.1	23.7	110	54.6	2.2	6	20	33	1.1	389	1	1	3	1	0	0	0	0	0	0	0	1	0	14	57	33	15	7	1	1	1	1	1
74	1	23.4492	80	54	6	100	36.39	26	2.4	10.8333	10.9	128	6.9	15.9	134	8	3.4	14.9	257	44.4	1.4	18	53	89	4.4	482.686	0	1	3	0	0	1	1	0	0	1	0	0	0	10	97	48	5	10	0	0	1	0	0
77	2	29.784	63	64	22	95	36.5	35	2.5	14	13	265	10.6	15.5	141	4.2	1.4	19.4	204.822	30.4	1.8	0.5	19	17	2.5	215	0	1	3	1	1	1	1	0	0	0	1	0	0	5	66	34	15	8	1	0	1	1	1
77	1	19.1858	97	56	12	92	36.56	44	3.3	13.3333	13.5	139	10.6	14.1	139	4.8	1.8	11.4	171	25	1.1	1.7	23	62	4.5	482.686	1	1	3	1	1	0	0	1	0	0	0	1	0	7	67	36	15	7	0	0	1	1	1
53	2	26.892	125	114	15	99	36.33	52	2.4	21.6667	14.4	52	12.5	19.5	139	3.5	6.4	19.3	204.822	32.4	1.8	2.7	37	36	2.5	269	1	1	2	1	0	1	0	0	0	0	0	0	0	8	74	30	14	7	0	0	0	1	1
67	2	27.7551	112	92	16	97	36.78	61	1.9	32.1053	17.6	144	8	18.1	122	3.5	3.4	27.2	204.822	49	2.5	15.1	104	212	3	652	0	1	3	1	1	0	0	1	1	0	1	1	0	15	101	45	13	6	0	0	1	1	0
64	1	25.3636	84	60	19	95	36.33	44	3.7	11.8919	10.2	154	9	16.3	127	5.1	3.1	39.8	137	100.8	3.6	2.8	20	31	3.1	136	0	1	3	1	0	0	0	1	0	0	0	1	0	13	84	35	10	8	0	1	1	1	0
68	2	47.123	90	77	32	98	36.94	58	3	19.3333	10.8	134	9.1	21.2	135	3.2	2.6	17.8	204.822	36.2	1.6	5.7	21	45	2	217	1	1	1	1	1	1	1	0	1	1	0	0	1	10	71	48	7	8	0	0	0	1	1
65	2	36.352	77	91	21	99	37.06	30	3.2	9.375	24.4	114	12.4	17.4	134	3.6	2.3	15.2	204.822	50.6	1.4	4.5	21	35	1.9	163	0	1	2	1	0	1	0	1	0	0	0	1	0	10	67	30	14	7	0	0	1	0	0
61	2	29.3367	89	50	16	100	36.72	23	2.7	8.51852	6.7	94	9.9	15.7	143	3.5	2.8	16.7	112	39.2	1.5	10.5	369	1151	1	482.686	1	1	2	1	1	0	0	0	0	0	0	0	0	8	58	28	15	7	0	1	1	1	1
58	2	29.7619	102	70	15	100	36.89	18	3.2	5.625	3.5	49	8.3	14.8	146	4.1	5.6	18.8	246	50.6	1.7	1.2	1314	3223	1	5150	0	1	1	1	0	1	0	0	0	0	0	0	0	11	59	29	15	5	1	1	0	0	0
41	1	23.03	72	93	20	100	35.72	18	3.3	5.45455	6.5	61	12	14.3	143	3.4	2.6	25.6	122	39.7	2.4	6.6	16	32	0.5	246	1	1	3	1	0	0	0	0	1	0	0	1	1	12	68	45	15	3	1	0	0	1	1
60	2	33.4821	97	66	19	94	36.83	74	2.2	33.6364	13.3	92	9.6	21.8	137	4.6	2	18.1	212	32.6	1.7	2.5	34	53	6.5	217	0	1	1	1	0	1	0	0	0	0	0	0	0	12	66	29	13	7	0	0	1	1	0
73	2	27.128	60	96	35	92	37.5	56	3.2	17.5	7.7	88	9.8	14.9	138	4	0.8	25.6	325	65.5	2.4	1.4	53	19	5.9	263	0	1	3	1	0	1	1	0	0	0	0	1	0	6	44	27	15	11	0	0	1	1	0
49	2	21.9727	73	96	13	99	36.72	8	3.1	2.58065	6.3	55	16	14.7	139	4.6	1.7	36.3	108	66.8	3.3	44.3	2612	2852	0.4	482.686	1	1	3	1	0	0	0	0	0	0	0	1	0	8	43	22	12	3	1	1	0	1	1
43	2	32.9861	98	51	19	97	36.56	78	3.1	25.1613	11.5	39	5.7	19	129	3.6	6.7	42.9	129	51.4	3.9	15.6	57	120	6.2	426	1	1	3	1	0	0	0	0	0	0	0	1	0	14	89	33	12	3	0	0	0	1	1
51	2	30.0712	83	72	18	98	36.33	16	2.2	7.27273	11.2	81	11.1	20.5	137	3.8	0.9	16.2	204	28.6	1.4	3.1	31	78	0.7	251	1	1	2	1	0	0	0	0	1	0	0	0	1	11	88	41	6	5	0	0	1	1	1
70	2	33.7131	81	81	23	99	37.61	59	2.6	22.6923	8.2	140	11.4	14.6	140	3.7	1.4	15.8	204.822	31.9	1.4	2.8	136	29	1.7	253	0	1	1	0	0	1	0	0	0	0	0	0	0	8	40	31	14	9	0	0	0	0	0
59	2	36.8481	89	60	15	95	35.33	48	2.4	20	8.7	115	12.1	15.5	145	4.3	9.2	36	65	150	3.6	3.2	26	40	2.9	482.686	1	1	3	0	0	1	0	0	0	0	0	1	0	12	53	43	15	10	1	1	1	1	1
68	2	24.4473	130	99	18	86	36.67	33	2.7	12.2222	11.8	34	12.7	16.6	127	4.7	2.4	23.1	98	45.3	2.1	4.3	108	151	1.2	493	0	1	3	1	1	0	0	0	0	1	1	1	0	15	100	46	13	6	1	1	0	1	0
54	2	33.9633	87	58	14	98	36.44	85	3.4	25	14.8	30	7.1	19.9	131	4.3	7.5	57.8	48	150	5.3	23.1	148	383	7.2	1750	0	1	3	1	0	0	0	0	0	0	0	1	0	15	82	24	15	5	1	1	1	1	1
51	2	35.0966	95	117	24	98	36.5	39	4	9.75	11.1	82	7.5	21.8	138	4.7	3.6	28.3	84	150	2.6	16	11	44	1.4	281	1	1	2	1	0	0	0	1	0	0	0	1	0	15	71	37	13	4	1	1	1	1	1
61	1	24.6953	87	82	20	100	37.78	9	2.7	3.33333	14.6	75	7.8	14.4	140	3.6	1.1	17.7	176	32.7	1.6	4.5	335	1160	0.6	870	1	1	3	1	0	0	0	0	0	0	0	0	0	6	49	34	15	5	0	0	1	1	1
58	1	30.0826	113	69	15	99	37.5	96	2.3	41.7391	10.8	76	9.3	13.7	117	5.1	1.6	13.8	136	47.3	1.3	1.9	66	234	8.9	474	0	1	3	1	1	0	0	0	0	0	0	1	0	16	101	42	15	4	0	1	0	0	0
60	2	22.2837	73	98	16	99	36.83	7	3.7	1.89189	10.2	246	8.2	13.5	140	4.1	1	11.6	166	30.6	1.1	0.9	21	25	0.6	148	0	1	2	1	1	0	0	0	1	1	0	1	0	1	39	32	15	4	1	1	0	0	0
68	2	38.8784	95	129	17	100	3.11	18	2.9	6.2069	10.8	78	11.6	12.8	137	4.3	3.4	20.2	150	38.6	1.8	2.5	1009	1654	1.3	345	1	1	2	0	1	0	0	1	0	0	0	1	0	9	31	26	15	7	1	1	0	1	1
21	2	19.3807	115	107	18	100	37.17	18	1.4	12.8571	8.6	80	8.3	20.4	136	4.2	2.9	27.6	176	46.7	2.5	9.1	562	1770	0.8	482.686	1	1	2	1	0	0	0	1	0	0	0	1	0	8	75	19	15	3	0	0	0	1	1
64	2	14.5266	104	105	19	100	36.94	6	4.7	1.2766	13.7	421	12.5	13.7	129	5.5	2.3	11.3	296	33.2	1	0.6	20	59	0.6	788	0	0	0	0	1	0	0	0	0	0	0	1	0	2	30	26	13	7	0	0	1	0	0
43	1	22.5325	142	88	28	99	37	10	2.7	3.7037	11.5	96	6.9	19	128	3.1	4.3	24.4	124	51.9	2.2	13.7	31	225	0.6	354	1	1	3	1	1	1	0	1	1	0	0	1	0	15	92	42	15	4	1	1	1	1	1
42	2	24.3363	117	87	16	100	37	21	1.9	11.0526	19.6	118	10.6	17.2	131	4.3	5.3	20.8	138	41.3	1.9	6.8	36	92	2.6	275	1	1	1	1	0	0	0	0	0	0	0	1	0	14	84	51	13	6	0	0	0	1	1
73	2	32.6644	84	79	17	97	37.67	17	3	5.66667	8.3	117	8.9	15.1	129	3.8	1.9	14.2	204.822	34.1	1.3	1.8	54	105	1	186	0	1	2	1	1	1	0	0	0	1	0	1	0	5	36	28	15	8	0	0	1	0	0
57	1	19.487	114	95	22	99	36.78	11	2.2	5	6.4	76	10.1	19.2	139	3.7	4.7	15.1	152	31	1.3	1	18	69	0.3	270	0	0	0	1	0	0	0	0	1	0	0	0	0	2	31	39	15	4	0	0	0	1	0
45	2	32.2494	70	66	16	97	35.33	12	3.3	3.63636	7.2	134	12.8	15.6	135	3.5	6.6	21.6	203	46.5	2	8.6	191	312	0.5	180	0	1	3	1	1	1	0	0	0	0	0	1	0	5	56	32	15	4	1	1	0	1	0
51	1	34.5451	79	59	21	98	36.33	33	2.1	15.7143	4.7	58	9.5	17	132	3.7	0.8	16.3	172	46.2	1.5	23	185	352	1.2	239	0	1	3	1	0	1	0	0	0	0	0	1	1	9	72	27	13	5	0	0	1	0	0
55	1	28.4665	48	96	12	97	36.39	21	2.5	8.4	5.5	61	8.5	25.2	156	3	3.21904	27.5	157	30	2.5	6.7	57	154	0.5	463	1	1	2	0	1	0	0	0	0	0	0	1	0	8	38	39	15	4	0	0	1	1	1
45	1	24.0753	157	86	19	97	37.28	14	0.9	15.5556	28.7	462	11.7	18.3	134	3.3	2.6	20.2	204.822	34.1	1.9	0.3	95	47	1.2	723	0	1	2	0	0	0	0	0	0	0	0	1	0	3	70	34	14	3	0	0	1	0	0
59	2	35.0264	130	63	24	91	37.39	17	2.1	8.09524	4.8	158	15.4	14.3	140	4	7.3	17	414	28.8	1.5	2.1	41	71	1.3	305	0	1	2	1	1	0	0	0	0	1	0	0	0	14	102	55	7	6	0	0	1	0	0
64	2	22.534	94	75	16	100	36.83	33	2.1	15.7143	6.5	120	5.7	17.6	123	4.3	2.3	17.3	134	29.7	1.6	2.3	24	26	1.4	156	0	1	2	1	1	0	0	0	0	1	0	1	0	8	55	22	15	6	0	0	0	1	0
55	2	27.4817	86	78	26	95	36.94	13	3	4.33333	9.3	65	9.5	17	142	4.1	2.1	20.2	155	34.7	1.9	5.9	789	1933	1	482.686	0	1	3	1	0	0	0	1	0	0	0	1	0	11	42	22	14	5	1	0	0	0	0
41	1	27.5556	73	60	13	96	36.61	103	3.6	28.6111	15.6	105	9.7	22.8	135	3.5	1.7	23.1	300	54.1	2.2	20.4	63	116	5.4	322	0	1	3	1	0	0	0	1	1	0	0	1	0	13	83	34	11	3	1	1	1	1	0
70	1	36.5473	87	67	15	97	36.61	41	2.4	17.0833	27.8	240	3.6	21.5	134	4.7	5.8	22.2	88	76.5	2	4.9	70	235	1.2	731	1	1	2	1	1	0	1	0	1	0	0	1	1	8	95	41	8	7	1	0	0	1	1
65	2	25.06	120	88	16	100	36.5	15	2.1	7.14286	12.1	228	11.1	16.6	132	3.4	1.5	10.3	204.822	29.1	1	0.3	29	64	1	482.686	0	1	3	1	1	1	0	0	0	0	1	1	0	7	52	45	15	7	0	0	1	0	0
73	2	27.5849	74	76	20	100	38.06	54	2.4	22.5	11.8	64	11.2	15.9	141	4.7	2.7	16.2	204.822	30.8	1.5	2	17	45	1.6	307	1	1	2	1	1	1	0	0	1	0	0	1	0	12	84	42	6	8	0	0	1	1	1
33	1	33.646	82	76	23	99	36.83	20	3.7	5.40541	15	100	8.2	21.8	140	3.2	1.6	33.6	90	72	3.3	28	16	65	4.2	235	0	1	3	1	0	0	0	0	1	0	0	1	1	12	76	29	12	3	1	0	1	1	1
61	2	28.7698	78	97	17	100	36.61	23	2.2	10.4545	8.7	81	9.1	16.8	143	4.1	2.6	20	151	41.4	1.9	5.7	22	60	1.3	453	1	1	3	0	0	1	0	0	0	0	0	1	0	7	47	25	14	6	1	1	1	1	1
68	1	22.8906	79	74	14	100	36.5	24	2.5	9.6	4.2	253	10.9	23.1	122	3.6	1.9	49.7	84	49.7	4.6	12.7	1397	1320	0.5	899	0	0	0	1	1	0	0	0	0	0	0	1	0	6	61	24	14	6	0	0	1	1	1
72	2	22.0968	122	104	17	99	37.11	13	3	4.33333	10.4	108	8.6	19.9	139	4	1.5	19.6	79	57.2	1.8	1.6	16	39	0.8	248	0	1	2	0	1	0	0	1	0	0	0	0	0	5	33	42	14	13	0	0	0	0	0
62	2	28.5168	115	121	16	91	36.39	46	3.9	11.7949	5	10	11	12.9	134	5.3	1.6	14.2	435	28.2	1.3	1.4	29	24	2.4	385	0	1	1	0	0	1	0	0	0	1	0	1	0	10	48	28	15	6	0	0	1	0	0
56	2	34.0138	96	72	21	88	36.33	35	4.7	7.44681	7.7	55	7.7	17.2	131	4.3	2.7	39.9	93	77.1	3.6	13	26	45	2.5	197	1	1	3	1	0	1	0	0	0	0	0	1	0	14	111	36	14	6	1	1	1	1	1
65	1	35.4308	135	102	19	94	36.89	27	2.1	12.8571	19.5	90	13.9	15.3	132	4.8	2.1	27	219	43.4	2.5	6.6	36	77	1	331	0	1	3	1	1	1	0	0	0	0	0	1	1	8	65	41	10	6	1	1	1	0	0
59	1	54.4444	96	62	15	97	36.5	45	4.2	10.7143	20	102	9.4	16.5	125	4.6	1.3	29.4	177	58.4	2.7	31.3	57	158	2.2	251	0	1	3	1	0	0	0	1	0	1	1	1	0	16	106	44	15	5	0	0	1	1	1
55	1	35.0057	115	115	13	94	37.28	54	2.7	20	11	110	6.5	18.8	134	6.6	4.3	22.5	165	32.3	2.1	7.8	10	28	2.8	202	1	1	3	1	0	0	0	0	0	0	0	1	0	9	89	48	11	4	1	0	1	1	1
68	1	32.3838	83	60	13	96	36.94	45	4.5	10	2.2	68	6.8	18	145	3.4	1.9	27.4	105	147.1	2.6	1.6	11	20	3.7	482.686	1	1	3	1	0	1	0	0	0	0	0	1	1	11	60	34	15	8	1	1	1	1	1
68	2	27.2463	91	96	20	100	36	44	4.6	9.56522	4.4	85	8.9	18.8	143	3.4	2.1	21	204.822	35.1	1.9	6.8	42	56	1.4	239	0	1	2	0	0	1	0	0	0	0	0	1	0	8	51	29	14	8	0	0	0	1	0
55	1	35.9818	74	60	23	87	37.44	15	2.4	6.25	13.4	264	8.2	17.5	138	3.6	1.7	20.4	204.822	38.2	1.9	1.4	37	92	0.8	764	1	1	3	1	1	0	0	0	1	0	0	0	0	5	41	34	15	4	0	0	0	1	1
74	1	29.7619	79	58	17	95	36.61	19	2.7	7.03704	7.2	152	6.1	16.7	139	3.6	1.7	13.8	204.822	26.1	1.3	1	14	21	0.8	181	1	1	2	0	1	1	0	0	1	0	0	1	0	2	32	27	13	10	0	0	0	1	1
66	2	39.3282	67	71	16	97	36.28	9	2.7	3.33333	7.4	94	6.8	14.9	138	4	2.5	18.7	242	46.4	1.7	0.9	36	47	0.8	170	1	1	2	1	0	1	0	0	0	1	0	1	0	4	26	16	15	6	0	0	0	1	1
65	1	25.6874	95	129	25	100	37.22	39	3.6	10.8333	8.1	150	11.3	14.1	126	4	3.3	13.9	407	29.5	1.3	0.4	6	15	10.9	171	0	1	3	1	0	0	0	0	0	0	0	0	0	6	63	34	13	5	0	0	1	0	0
52	1	32.1358	94	64	18	97	36.5	37	4.1	9.02439	10.1	57	8.6	17.5	119	4	1.7	28.1	91	51.8	2.6	11.6	42	108	1.7	431	1	1	2	1	0	0	1	1	1	0	0	0	1	8	60	23	15	5	0	1	1	1	1
48	2	44.7545	109	84	26	100	36.61	14	3.5	4	3.7	89	10.4	14	111	4.3	3.1	23.4	111	40.8	2.2	13	44	76	1	287	1	1	3	0	1	1	0	1	0	0	0	0	0	7	37	23	15	4	0	0	1	1	1
67	2	30.3288	119	84	41	74	38.5	55	1.9	28.9474	12.1	23	7.8	17.8	140	4.8	3.6	25	850	44.1	2.3	2.9	7	8	1.1	170	0	1	1	0	1	1	0	0	0	0	0	0	0	10	68	37	12	7	0	1	1	1	1
58	2	31.8878	81	80	14	100	36.83	28	3.1	9.03226	8.4	82	9.3	22.1	143	4.8	2.3	19.8	153	49.1	1.8	16.2	296	545	1.1	276	1	1	3	0	1	0	0	0	0	0	0	1	1	12	60	34	14	5	1	1	0	1	1
69	2	29.4076	88	91	13	96	36.72	9	2.4	3.75	6.7	261	9.7	20.2	131	3.8	3.21904	12.1	204.822	29.8	1.1	0.4	9	25	0.8	482.686	0	1	2	0	0	0	0	0	0	0	0	1	0	1	27	31	14	5	0	0	1	0	0
77	1	38.9062	77	79	20	93	35.94	45	3	15	6.8	271	10.4	22.1	137	4.8	3.21904	13.5	246	21.1	1.2	0.7	72	91	1.3	720	0	1	2	1	0	1	1	1	0	0	0	0	0	3	44	37	14	11	0	0	0	1	0
67	2	23.4704	130	120	28	91	37.61	21	2	10.5	7.4	10	10.9	14.8	137	3.8	3.6	24	240	51.3	2.2	9.9	29	74	1.4	151	0	1	2	1	0	0	0	1	1	0	0	0	0	15	86	47	14	10	1	1	1	0	0
53	1	25.5647	101	75	16	100	36.72	36	2.9	12.4138	21.8	103	8.8	15.7	146	3.4	1.9	17.2	624	33	1.5	1.4	39	68	1.2	230	0	1	1	1	1	0	0	0	1	0	0	1	0	6	43	30	15	2	1	1	0	0	0
54	1	26.0417	64	65	21	99	36.94	80	3.9	20.5128	5	55	7.6	18.6	136	3.8	1.7	25.2	239	41.5	2.3	2.4	58	95	3.3	445	0	1	2	1	0	0	0	1	0	0	0	1	0	12	55	22	12	6	0	0	1	1	0
67	2	29.4204	52	63	21	95	36.44	51	2.4	21.25	7.3	84	9.6	19.9	138	4.3	3	18.9	204.822	78.6	1.7	1.7	123	172	4.4	482.686	0	1	3	1	0	1	1	0	0	1	1	1	0	10	50	28	13	10	0	0	1	1	1
72	1	44.5329	78	56	19	100	36	130	3.6	36.1111	9.6	274	8.6	21.8	140	5.2	1.1	14.3	204.822	29.3	1.2	1.3	32	40	3.9	240	1	1	3	1	0	1	1	0	0	1	0	1	0	8	59	34	15	10	0	0	0	1	1
65	2	30.6831	127	88	31	95	36.78	49	1.9	25.7895	21.7	102	10.1	18.8	129	6.5	9.3	25.6	146	46.2	2.5	14.4	424	584	1.1	541	1	1	1	1	1	0	0	1	0	0	0	0	1	6	76	32	15	7	0	0	1	1	1
73	2	38.9739	73	62	19	100	36.56	20	3.9	5.12821	3.7	81	8.7	18.9	147	3.9	3.5	23.9	204.822	56.3	2.3	4.9	19	59	1.3	373	0	1	3	0	0	1	0	0	1	0	0	1	1	14	56	44	11	9	0	0	1	1	1
67	2	25.6165	145	78	33	93	39	42	3.2	13.125	9.2	170	8.5	14.9	129	4	1.3	16	204.822	31	1.5	0.6	16	44	3.4	312	0	1	2	0	0	1	0	0	0	1	0	0	0	3	53	29	15	6	0	0	0	0	0
55	1	22.3214	140	102	18	98	36.89	2	2.6	0.769231	12.5	384	7.1	18.3	137	3.1	1.5	24.7	441	36.7	2.3	1.1	7	37	0.5	115	0	0	0	0	0	0	0	0	1	0	0	1	0	5	41	34	15	4	0	0	0	0	0
62	2	16.5108	120	106	20	100	36.56	26	2.5	10.4	24.2	345	10.6	14.8	139	4.2	2.2	13.3	410	32.6	1.2	0.7	12	33	0.7	136	0	1	2	1	0	0	1	0	0	1	0	1	0	4	74	48	8	5	0	0	1	0	0
71	2	26.0771	88	109	30	85	36.83	20	2.8	7.14286	12.5	436	14.2	14.9	127	8	5.3	16.7	204.822	25.7	1.5	1.1	17	54	0.8	507	1	1	1	0	1	1	0	1	1	0	0	1	0	6	51	30	15	14	0	0	1	1	1
61	2	25.9516	106	79	8	99	37.5	16	2.5	6.4	12	151	10.2	17.5	142	4.8	10.8	22.8	109	143.7	2.2	4.5	771	1486	0.7	298	1	1	2	1	0	0	0	0	1	0	0	0	0	13	104	38	3	7	0	1	1	1	1
60	1	22.3923	98	124	21	97	36.44	142	3.5	40.5714	20	52	8	25.4	131	4.1	3.6	25.8	144	150	2.4	28	124	196	1.8	407	1	1	2	1	0	0	0	1	0	0	0	1	0	13	67	31	8	4	1	0	1	1	1
78	2	29.7222	91	58	20	97	36.56	32	2.4	13.3333	17.2	204	10.6	16.8	137	4	8.4	13.2	292	34.8	1.2	1	29	71	1.9	428	1	1	3	1	0	1	1	0	1	0	0	0	0	11	62	43	15	17	0	0	1	1	1
40	1	37.324	90	93	16	100	36.94	35	3.1	11.2903	6.8	46	9.4	18.7	137	4.2	2.5	21.1	157	45.9	1.9	11.7	134	381	0.9	245	0	1	3	1	0	0	0	0	0	0	0	1	0	13	75	41	13	3	0	1	1	0	0
65	2	38.3007	83	83	28	100	36.83	19	2.9	6.55172	4.4	70	6.5	18.3	137	3.7	1.8	16.1	211	33	1.5	2.8	10	17	0.7	482.686	0	1	3	0	1	0	1	0	0	1	1	1	0	5	34	30	15	7	1	1	0	1	0
53	1	37.0356	115	73	12	100	36.61	12	2.7	4.44444	6	38	8.8	20.1	131	5	4.5	22.7	190	36.8	2.1	9.3	926	2179	0.8	579	0	1	3	0	1	0	0	1	1	0	0	0	0	15	73	39	15	4	1	1	0	0	0
59	2	30.4498	101	72	22	94	36.61	50	2.1	23.8095	15.3	155	8.8	19.1	131	4.3	2.2	23.9	204.822	48.8	2.2	23.3	45	120	2.4	528	0	1	3	1	1	0	0	0	1	0	0	1	0	9	89	31	14	6	1	0	0	1	0
79	1	26.9727	85	66	16	100	36.67	12	2.4	5	17.3	96	8	15	139	4.3	2.7	24.8	203	30.6	2.2	18	53	89	0.7	482.686	0	1	3	0	1	1	1	0	0	1	1	0	0	8	28	34	15	8	1	1	0	0	0
52	2	26.1996	102	102	28	91	36.72	9	3.5	2.57143	6.9	62	11	23.1	134	3.2	2.1	22.2	204.822	30.8	2	28.1	48	161	0.4	225	1	1	3	1	0	1	0	1	1	0	0	1	0	10	53	31	13	5	0	0	1	1	1
68	1	22.4159	94	62	19	98	36.56	50	3.9	12.8205	12.4	101	10.2	19.1	144	3.6	3.21904	22.1	204.822	54.2	2.1	2.4	8	16	1.2	135	0	0	0	1	0	0	0	0	0	0	0	1	0	3	40	22	15	6	0	0	1	0	0
55	2	24.8016	126	95	25	99	36.5	19	2.6	7.30769	22	491	9.9	18.2	129	3.3	3.1	18.7	411	34.8	1.7	18.9	157	465	0.6	456	0	0	0	1	0	0	0	1	0	0	0	0	0	8	64	34	15	2	0	0	0	0	0
61	2	29.195	74	103	24	99	36.83	65	3.7	17.5676	14.1	158	8.9	21.2	139	4.8	1.6	10.7	145	24.1	1	0.5	26	35	4.5	258	1	1	3	0	0	0	1	0	1	0	0	1	0	10	46	26	15	9	0	0	1	1	1
48	2	25.4694	135	77	38	98	37.22	31	2.4	12.9167	5.6	44	5.6	14.9	142	4	18	30.9	78	30.8	2.8	0.9	2673	10880	1.7	6120	1	1	3	1	1	1	0	1	0	0	0	1	0	12	69	47	15	4	0	1	0	1	1
54	2	22.9412	89	82	27	100	36.5	14	1.6	8.75	32.5	103	10.1	24.8	138	2.5	4.6	21.1	159	42.9	2	2.1	22	45	0.5	131	1	1	3	1	0	1	0	1	0	0	0	1	0	11	68	35	11	6	1	1	1	1	1
37	1	22.5074	127	99	17	97	36.61	1	2.3	0.434783	21.8	185	9.8	15.6	130	3.4	3.3	24.2	204.822	36.7	2.2	23.3	30	242	0.2	202	0	1	2	1	0	1	0	1	0	0	0	1	0	9	63	33	13	4	0	0	0	0	0
65	2	20.9396	96	88	18	95	36.67	36	4.2	8.57143	10.8	178	16	15.5	139	4.7	1.2	12.3	204.822	80.6	1.1	0.5	11	12	1	228	1	0	0	0	0	0	1	0	0	0	0	0	0	1	31	31	15	8	0	0	1	1	1
61	1	29.7143	131	83	25	100	2.89	23	2.8	8.21429	7.5	122	11.7	15.6	139	3.8	3.9	20.8	237	32.3	1.9	4.2	292	426	1.5	249	0	1	3	1	0	1	1	1	0	0	0	0	0	12	81	42	15	10	1	0	0	0	0
72	2	27.3845	96	96	25	91	36.67	14	2.4	5.83333	14	55	5.8	14	143	4.5	1.2	12.6	144	35.4	1.2	1.4	63	76	1.3	482.686	0	1	2	1	0	0	1	1	1	0	1	0	0	5	49	33	15	9	0	0	1	1	1
58	2	31.1728	76	85	16	97	37.33	24	2.8	8.57143	29.6	123	13.1	15.1	142	4.4	2.5	15.2	204.822	24.8	1.4	1.8	34	26	0.8	315	0	1	2	1	1	1	0	0	0	0	0	0	0	4	29	27	15	5	0	1	1	1	1
53	2	34.9714	91	85	22	99	36.67	7	3.2	2.1875	6	59	6.6	14.8	117	3.9	1.2	26.2	198	39.5	2.4	25	43	122	0.7	229	1	1	1	0	1	0	0	1	0	0	0	1	0	7	39	22	15	4	0	0	0	1	1
62	2	25.9708	74	100	26	99	37	65	3.9	16.6667	10.5	166	10.3	14	127	5.9	1.7	20.8	204.822	28.1	1.9	2.6	20	30	3.8	207	1	1	3	1	0	1	0	0	0	0	0	1	0	7	46	27	15	9	0	0	1	1	1
69	1	27.735	121	70	25	100	36.61	41	3.4	12.0588	6.4	54	8.8	18.7	142	3.8	1.6	14.8	199	42.9	1.4	1.5	11	26	1.9	180	0	1	3	1	0	1	0	0	1	1	1	1	0	13	88	45	13	10	0	0	1	1	1
76	2	41.8084	100	71	16	93	36.44	26	2.5	10.4	17	255	11.8	13.7	134	4	1.8	20.3	212	34.7	1.8	1.3	72	65	1.4	180	0	1	2	1	1	1	1	0	1	0	0	0	0	3	61	36	15	6	1	0	0	0	0
51	2	23.6957	80	65	26	100	36	44	2.9	15.1724	7.7	72	9.5	14.2	131	4.4	15	20.8	85	32.2	1.9	2.3	62	80	2.6	204	0	1	2	1	0	1	0	0	1	1	0	0	0	11	52	32	15	5	0	0	1	0	0
56	2	25.4325	66	87	24	97	36.78	42	2.4	17.5	5.6	247	11	20.1	143	5.3	1.8	12.9	594	28	1.2	0.2	41	161	4.2	626	0	1	3	1	1	0	0	0	1	1	0	0	0	10	73	39	15	4	0	0	0	0	0
69	1	33.573	102	87	22	98	36.67	27	2.5	10.8	24.5	152	11.1	15	139	4.7	2.9	26	121	55.2	2.4	4.2	1222	3873	1.2	167	0	1	3	1	0	0	0	0	0	0	0	1	0	7	54	37	15	7	0	0	0	0	0
56	2	30.5947	105	91	22	99	37.06	12	3.7	3.24324	32.4	223	13.7	14.2	147	4.5	10.6	18.5	256	64.7	1.7	2.2	478	1101	1	1197	0	1	2	1	0	0	0	1	1	0	0	0	0	10	114	48	3	6	0	0	0	0	0
42	2	28.2779	100	71	20	99	38.28	5	2.8	1.78571	3.9	82	9.2	14.8	140	3.2	1.2	14.6	237	32.6	1.4	4.2	31	191	0.6	282	0	1	3	1	0	0	0	1	1	0	0	0	1	11	39	34	15	3	0	1	1	0	0
50	1	31.7418	60	61	23	93	36.44	18	2.7	6.66667	4.2	37	11.8	17.8	151	3.8	1.3	16.2	204.822	34.6	1.4	2.9	359	57	0.7	191	1	1	2	1	0	0	0	0	1	0	0	1	0	9	66	42	15	3	0	1	1	1	1
57	1	24.6599	99	84	15	86	35.94	72	2.1	34.2857	8.2	107	13	15.6	158	3.4	2.8	11.9	483	31.6	1.1	0.6	60	146	2.1	278	0	1	3	1	0	0	0	1	1	0	0	1	0	19	128	58	4	3	0	0	0	0	0
58	2	46.9104	87	86	20	100	36.83	24	3	8	9.9	145	17.6	16.3	139	4.9	1.9	15.9	408	29.3	1.5	1.1	13	18	1	460	0	1	3	1	0	0	1	0	0	0	1	1	0	8	31	33	15	4	0	0	1	1	1
50	2	25.7937	141	72	24	93	36.5	14	2.5	5.6	24.8	59	12.1	21.8	131	4.1	6.3	26.2	204.822	48.2	2.5	5	65	140	1	329	0	1	2	1	0	0	1	0	0	0	0	0	0	6	55	26	15	11	0	0	0	1	0
40	1	28.5399	92	56	20	93	37.11	30	2.1	14.2857	18.3	30	8.8	18.9	131	3.2	3	30.5	135	60.3	2.9	3.5	49	36	1.2	321	1	1	3	1	0	0	0	0	1	0	0	1	0	7	84	36	15	4	1	1	1	1	1
57	2	30.3051	98	117	15	100	36.61	16	2.5	6.4	8.9	52	10.2	17.1	134	3.9	2.1	20.4	150	33.3	1.9	5.5	1359	1648	0.8	364	1	1	3	0	1	0	0	1	0	0	0	1	0	7	49	34	15	5	0	0	0	1	1
48	2	48.8946	99	43	28	92	36.94	20	3.4	5.88235	15	36	8.4	15	135	3.7	14	31.4	116	58.1	2.9	6.1	85	389	2	482.686	0	1	3	1	0	0	0	0	0	0	0	1	0	15	78	39	15	1	0	1	1	1	1
71	2	52.3668	94	130	26	90	37	103	2.4	42.9167	25.9	101	11.8	15.7	119	5.3	3.7	13.1	768	35.6	1.2	0.6	191	290	9.7	374	0	1	1	1	0	1	1	0	0	1	0	0	0	7	59	28	15	11	0	0	0	1	0
54	2	34.0138	87	57	17	96	36.61	17	3.4	5	8.9	54	6.8	22.7	134	4.9	1.8	27.3	71	65.3	2.7	27.1	25	54	1.8	383	1	1	3	1	0	0	0	0	0	0	0	1	0	11	88	33	15	9	1	1	1	1	1
65	2	31.1295	87	72	12	100	36.78	17	3	5.66667	10.8	254	11.8	16.8	141	3.7	1.1	12.2	204.822	28.6	1.1	1.9	12	20	0.7	365	0	1	2	0	0	0	1	0	0	1	0	0	0	3	29	33	13	6	0	0	1	0	0
42	1	17.3965	87	68	10	100	36.39	9	2.6	3.46154	18.1	358	10.1	19	132	3.8	3	18.8	230	40.5	1.7	5.7	49	84	0.3	306	0	1	1	0	0	0	0	1	1	0	0	1	0	9	47	30	15	9	0	0	1	1	1
72	1	28.1321	91	63	24	95	36.72	84	4.3	19.5349	4	44	10.1	15.7	150	3.1	4.9	32.9	138	83.1	3.1	11	17	35	1	176	1	1	3	1	1	0	0	0	0	0	0	0	0	14	81	40	11	6	1	1	1	1	1
54	2	29.6914	135	100	30	97	37.11	4	2.1	1.90476	7.3	122	10.6	14.4	121	3.4	2	15.6	224	30.5	1.4	3	61	173	0.4	243	0	1	2	1	1	0	0	1	1	0	0	1	0	10	44	35	15	4	0	0	1	0	0
57	2	26.5347	88	49	20	100	36.39	59	2.2	26.8182	22.6	186	9.3	21.6	130	7.6	3.9	27.4	194	34.4	2.5	25.8	96	218	1.3	591	1	1	3	1	0	0	0	1	1	0	0	1	0	15	66	35	15	10	1	1	1	1	1
69	1	42.3875	69	73	24	100	36.72	12	3.4	3.52941	7.3	243	9.8	13	119	3.3	3.21904	13.8	204.822	135.5	1.3	0.7	47	51	0.4	190	0	1	3	0	0	1	1	1	0	0	0	0	0	1	34	22	15	6	0	0	0	0	0
57	2	20.727	71	95	20	99	36.89	38	4.2	9.04762	10.2	239	14.8	12.8	150	4.6	3.21904	12.7	204.822	26.2	1.2	1.7	104	83	1	322	0	0	0	0	0	0	0	1	0	0	0	0	0	4	47	32	13	3	0	0	0	0	0
63	1	33.6593	107	80	21	96	36.67	5	2	2.5	24.3	91	11.2	14.2	135	2.5	1.5	16.1	132	51.7	1.5	6.7	21	93	1.1	237	0	1	3	1	0	0	0	1	0	0	0	0	0	10	44	26	15	4	0	0	1	1	1
48	2	29.6025	80	59	16	100	36.78	27	3.1	8.70968	12.4	122	6.7	16.4	141	4.1	2.3	15.6	185	41.3	1.4	0.4	20	44	1.5	251	1	1	2	0	0	1	1	0	0	1	0	0	0	4	34	34	15	9	1	1	1	1	1
43	1	21.4187	121	72	21	95	37.06	10	3.7	2.7027	3.5	30	7	19.3	131	3.6	2.8	21.7	155	38.7	2	19.3	30	172	0.6	334	0	1	2	1	0	0	0	1	0	0	0	1	0	9	56	26	14	3	0	0	1	1	1
62	2	20.1953	61	66	14	98	36.78	19	2.4	7.91667	9.9	395	8.9	15.9	140	4.3	0.5	15.9	204.822	37.7	1.5	1.1	33	107	0.9	149	0	0	0	1	0	0	0	0	0	0	1	1	0	5	20	35	14	5	0	0	0	0	0
50	1	23.088	95	86	35	100	36.78	9	2.2	4.09091	2.2	79	5.9	17.8	134	3.6	1.4	17.8	162	150	1.6	2.9	13	43	0.6	288	0	1	2	1	0	0	0	0	1	0	0	1	0	8	59	37	15	3	0	0	1	0	0
65	2	38.4903	86	78	14	100	36.72	59	2.9	20.3448	9.3	262	9.7	17	136	4.3	3.6	25.4	204.822	39.9	2.3	0.7	137	126	2	1103	0	1	2	1	0	1	1	0	1	1	0	0	0	2	57	25	15	7	0	0	1	0	0
57	1	35.1538	73	101	18	100	37.11	18	2.7	6.66667	5.2	113	10.5	19.8	140	4.2	1.2	15.3	179	34.5	1.3	4.8	245	328	0.9	381	0	1	3	1	1	0	0	0	0	0	0	0	0	12	50	34	15	10	0	1	1	0	0
67	1	36.1395	101	69	20	96	36.67	124	4.3	28.8372	16.8	121	8.4	19.9	128	5.1	2.6	21.1	29	37.4	1.9	8.1	32	61	4.6	308	1	1	3	1	0	0	1	0	0	0	0	1	0	11	77	27	13	5	0	0	1	1	1
72	2	30.6048	60	44	24	96	35.5	32	2.2	14.5455	13.1	139	7.6	21.8	134	4.9	2.8	25.6	204.822	46	2.5	4.4	38	75	1.1	234	0	1	3	1	1	1	0	0	0	1	0	1	1	7	73	28	15	7	0	0	0	1	0
62	2	45.0503	108	87	37	88	37.83	29	2.1	13.8095	19.3	90	9.3	21.6	141	4.2	4.7	23	204.822	47.3	2.2	1.1	8	28	5.8	214	0	1	3	1	1	1	0	0	1	0	0	1	0	13	70	39	15	4	0	0	1	1	1
59	2	35.5726	86	84	13	96	36.78	5	2.4	2.08333	2.1	30	10.9	16.6	137	4.1	1.3	23.6	204.822	41.7	2.2	1.6	23	32	0.5	365	0	1	2	1	0	0	0	1	1	0	0	1	0	8	32	21	14	4	0	0	1	0	0
48	1	21.4799	66	73	18	95	36.83	79	3.2	24.6875	7.6	155	12.8	19.1	129	4.7	1.1	15.1	309	29.7	1.3	2.6	34	82	3.3	251	0	1	3	1	0	0	0	0	0	0	0	1	0	12	83	33	14	7	0	0	1	0	0
50	1	30.863	95	82	17	97	36.61	13	3.5	3.71429	7.6	41	9.4	19.6	137	4.6	6.8	15	197	35.7	1.4	9.4	281	949	0.5	482.686	1	1	3	0	1	0	0	0	0	0	0	0	0	13	80	36	15	4	0	1	1	1	1
76	2	26.5143	80	80	21	91	36.56	32	2.8	11.4286	12.2	114	9	21	140	3.1	3.21904	15.3	204.822	29.6	1.4	0.9	14	21	0.9	314	0	1	1	0	1	0	0	0	1	0	0	1	0	4	31	18	15	10	0	0	0	1	0
65	2	29.0179	106	91	22	96	36.61	22	2.9	7.58621	12.4	109	7.8	18.1	136	4.8	8.2	20	169	40	2	3.1	80	218	1.2	310	1	1	3	1	0	1	0	1	0	0	0	1	0	5	59	29	15	12	0	0	1	1	1
36	2	38.9031	114	80	17	96	36.5	49	3.3	14.8485	17.4	84	7.2	19.8	126	4.6	1.2	26	146	33	2.4	22.1	72	159	1	246	0	1	2	1	0	0	0	1	1	0	0	1	0	8	55	26	14	3	1	0	1	1	0
43	2	17.5433	97	97	21	98	36.94	34	3.4	10	12.3	215	7	20.3	140	5.1	3.2	17.8	190	34.6	1.6	1.6	27	47	1	349	0	1	3	1	0	0	0	1	1	0	0	1	0	5	50	29	15	4	1	1	1	1	1
63	2	28.5002	98	112	16	94	36.89	9	3.2	2.8125	2.7	72	9.6	16.6	139	3.9	2	20	355	40	2	1.1	15	45	0.8	299	0	1	2	1	1	0	0	0	0	0	0	1	0	8	62	40	9	7	0	0	0	0	0
64	1	21.1522	98	83	27	95	36.61	45	2.4	18.75	18.4	73	9.9	17.1	136	5.8	1.9	33.2	204.822	39.8	3.1	2.8	23	115	2.4	960	0	1	2	1	0	0	1	0	0	1	0	0	0	9	57	42	14	8	0	0	1	1	1
63	2	22.4775	72	74	20	90	36.83	59	3.1	19.0323	6	40	11.6	21.5	132	5.2	4.1	22.7	204.822	42	2.1	4.9	31	79	1.5	585	0	1	2	1	0	1	1	0	0	0	0	0	1	8	78	32	14	8	0	0	1	0	0
54	2	51.877	96	48	20	99	36.89	101	4.2	24.0476	8.7	73	8.4	21.2	134	3.9	3.7	23.7	151	44.5	2.2	35.9	32	102	9	218	1	1	3	1	1	0	0	1	1	0	0	1	0	21	139	50	3	4	1	1	1	1	1
70	2	22.6403	103	110	26	98	36.72	23	3	7.66667	4	64	9.4	14.9	137	5.8	1.6	19.4	154	36.5	1.8	1.3	23	40	1	330	1	1	3	1	0	0	1	1	1	1	0	0	0	8	57	24	9	5	0	0	0	1	1
43	1	45.5641	66	50	14	100	35.11	23	3.3	6.9697	9.4	164	11.2	16.5	135	4.3	2.5	30.8	104	58	3	10.8	27	100	1.5	202	0	1	3	1	0	0	0	0	0	0	0	0	1	12	79	33	15	3	1	0	1	0	0
78	2	22.9119	88	81	20	99	36.33	29	2.8	10.3571	5.9	148	9.5	18.3	130	3.8	1.9	16.9	204.822	52.5	1.6	1.2	19	45	2.4	342	0	1	2	0	0	0	1	0	0	0	0	1	0	6	44	31	14	6	1	0	1	0	0
49	1	32.8578	138	69	10	98	36.94	38	2.1	18.0952	1.6	44	8.8	15.3	137	3.7	4	26.2	345	40.4	2.4	15.9	38	74	3	164	0	1	3	1	1	0	0	0	0	0	1	1	0	18	134	45	15	11	0	1	1	1	1
66	2	27.3314	144	93	27	94	36.78	40	3.9	10.2564	17.3	104	10	17.9	140	4.6	4.6	33.1	164	56.1	3	4.7	94	393	1.9	423	0	1	3	1	0	0	1	0	1	0	0	1	1	13	78	44	15	7	0	0	1	1	1
47	1	26.5731	129	83	29	99	36.67	42	4.1	10.2439	16.5	75	9.7	18.5	131	5.8	1.4	20.1	203	31.9	1.8	1.6	14	23	1.6	214	0	1	3	1	0	1	0	1	0	0	0	0	0	11	98	50	3	4	0	0	1	1	0
49	1	27.6795	92	70	15	99	36.67	8	2.9	2.75862	7	99	8.9	15.8	136	4.2	3	15.5	124	44.1	1.4	1	16	59	0.6	469	0	1	1	1	0	0	0	0	0	0	0	0	0	6	42	21	15	2	0	0	0	0	0
57	1	29.3575	98	66	15	100	37.39	37	3.3	11.2121	7.5	68	6.1	20.6	141	4.3	2.3	26.2	103	37.1	2.4	7.3	38	349	1.5	509	1	1	2	1	0	0	0	0	0	0	0	1	0	16	70	37	8	4	1	0	1	1	1
75	1	21.2084	91	79	26	95	36.39	40	3.2	12.5	5.6	201	7.9	16	134	4.1	1.5	17.3	201	39.3	1.6	0.7	12	25	2.2	249	0	1	3	1	1	0	1	0	1	0	0	1	0	3	66	37	15	7	0	0	1	1	1
64	2	20.5151	91	86	16	97	36.89	12	2.3	5.21739	5.4	81	9	16.4	149	3.5	3.7	16.8	204.822	43.7	1.5	2	35	54	0.7	313	1	1	2	1	0	0	0	1	1	0	0	1	0	7	41	24	12	9	1	1	1	1	1
64	2	28.2793	74	93	19	98	36.89	94	3.7	25.4054	11.4	64	8.8	14.9	145	3.1	2	20.3	181	37.2	1.9	1.5	15	22	4.7	195	1	1	1	0	0	0	0	0	0	0	0	1	0	11	28	21	15	7	0	0	0	1	1
58	2	28.9686	81	81	21	98	37.11	38	2.4	15.8333	9.9	68	9.7	16	144	5.4	1.4	19.2	402	40	1.8	1.5	39	34	1.1	408	1	1	2	1	0	0	0	0	0	0	0	1	0	11	46	33	15	4	1	1	1	1	1
68	2	34.3844	143	68	25	97	36.61	60	2.5	24	21	132	13.5	15.5	134	4.5	3.4	17.3	591	108.2	1.6	1.5	111	156	1.9	2085	0	1	3	1	0	0	0	1	0	0	0	1	0	7	80	35	14	11	0	0	1	1	1
60	2	25.2268	96	67	16	99	36.72	26	3.1	8.3871	6.8	144	14.1	17	119	5.7	2.9	14.7	204.822	25.2	1.3	17.5	71	88	0.8	296	0	1	3	1	0	0	0	0	0	0	0	1	0	10	67	31	15	3	0	0	1	1	0
78	2	41.5249	73	72	16	99	35.61	56	2.4	23.3333	15.9	349	8.8	20.5	126	4.9	1.7	16.8	204.822	34.8	1.5	0.1	19	24	6	482.686	0	1	1	1	0	1	1	0	0	1	0	0	0	6	61	28	14	11	0	0	0	0	0
67	1	28.2622	79	69	33	99	36.61	52	1.7	30.5882	18.9	187	7.9	14	143	3.7	1.4	23.3	204.822	37	2.1	4	23	55	0.7	335	0	1	2	1	1	0	0	1	0	0	0	0	0	8	68	31	9	7	1	0	0	1	0
51	2	22.7244	72	101	16	99	36.11	54	3	18	5.5	41	17.4	15.9	138	5.1	2.9	19.8	201	35.7	1.8	29.1	167	202	0.9	337	0	1	3	1	1	1	0	0	1	0	0	1	0	10	71	30	10	5	1	1	1	1	1
68	1	26.3958	75	111	12	100	36.56	9	3.1	2.90323	6.6	189	12.9	11.9	134	3.9	3.21904	13.1	307	37.1	1.2	1.4	27	96	0.6	348	0	0	0	0	1	0	0	0	0	1	0	0	0	5	38	33	15	3	0	0	0	0	0
39	2	14.854	107	100	35	100	38	7	3.7	1.89189	4.5	68	12.2	15.9	132	3.3	1.6	12.3	204.822	28.8	1.1	0.9	32	54	0.6	482.686	0	1	1	0	0	0	0	0	0	0	0	1	0	5	28	32	15	1	0	0	0	0	0
60	2	21.0815	97	68	27	96	35.83	18	2.6	6.92308	9	51	6.6	23.8	138	3.9	2.4	28.5	149	37.3	2.6	15.5	16	41	0.7	390	1	1	2	1	0	0	0	0	1	0	0	1	0	11	74	34	10	4	0	0	1	1	1
54	2	50.8433	86	49	11	98	36.61	68	1.5	45.3333	7.1	36	9.5	16.9	135	5.2	1.6	34.8	177	47.2	3.1	8.1	39	37	2.3	270	0	1	2	1	0	1	1	0	1	0	0	1	0	14	89	27	12	5	0	0	0	1	0
64	2	25.1559	122	75	18	96	36.56	112	3.7	30.2703	15.9	158	8.3	17.2	143	4.6	7.3	19.9	151	32.2	1.8	1.2	36	49	1.9	177	1	1	2	1	0	0	0	0	0	0	0	1	0	8	56	30	14	6	0	0	0	1	1
64	2	21.6216	94	76	17	100	36.72	42	2.9	14.4828	18.8	228	11	14.1	141	4.8	3.21904	14.6	204.822	23.7	1.3	1.6	57	68	1.1	202	1	1	1	1	1	0	1	0	0	0	0	0	0	2	46	38	15	7	0	0	0	1	1
53	1	27.3278	111	76	25	99	36.94	29	3.3	8.78788	13.8	95	7	23.3	135	4.3	2.3	19.7	161	37.6	1.8	20.2	30	135	2	482.686	0	1	3	1	0	0	0	1	0	0	0	1	0	13	84	38	15	4	1	1	1	1	0
66	2	16.7411	89	72	20	100	37.67	83	2.8	29.6429	14.6	134	10	15.2	136	2.7	0.7	9.4	204.822	30.6	0.9	0.3	25	29	6.8	160	0	1	2	1	0	0	0	0	1	0	0	0	0	12	68	37	15	12	0	0	1	0	0
56	2	26.4626	86	71	17	93	36.8	17	3.6	4.72222	19.5	200	10.6	15.6	137	5.1	2	15.4	204.822	42.6	1.3	2.3	54	104	1	296	0	1	2	0	1	1	1	0	0	0	0	0	0	8	87	43	3	7	0	1	0	0	0
63	2	26.3967	67	66	18	98	36.83	16	3.2	5	11	99	8	16.1	133	4.5	2.4	21.8	190	33.1	2	3.4	220	330	1	482.686	1	1	3	1	0	1	0	0	0	0	0	1	0	6	57	22	15	6	0	0	0	1	1
52	2	24.9787	76	94	16	97	37	44	2.7	16.2963	6.2	130	9.2	20.3	139	4.4	3.4	21.4	115	42.9	2	5.2	1276	2488	1.1	383	1	1	2	1	0	0	0	0	0	0	0	1	0	9	40	28	15	4	1	1	0	1	1
37	1	22.038	90	64	22	100	36.72	165	3.2	51.5625	22.1	155	6.8	23.3	134	4.1	1.6	60.4	131	70.4	5.45	43.5	46	145	13.2	363	1	1	2	1	0	0	0	1	0	0	0	1	0	10	80	33	15	5	0	0	1	1	1
53	2	21.2585	57	73	24	100	36.72	55	3.5	15.7143	5.8	35	6.3	16.1	144	5.2	3.9	26.5	109	54.2	2.41	14.5	57	109	1.1	297	1	1	1	1	0	0	0	0	0	0	0	1	0	13	79	34	15	6	0	0	1	1	1
64	2	31.0204	75	52	0	97	36.56	30	3	10	8.2	169	9.2	16.7	140	3.7	3.21904	13.7	498	25	1.2	3.1	20	25	0.9	201	0	0	0	0	1	0	0	0	1	1	0	0	0	3	39	25	15	6	0	0	1	0	0
75	1	32.4219	60	59	14	95	36.56	22	2.5	8.8	8.9	370	8.5	14.7	123	4.3	3.21904	12.8	204.822	31	1.2	0.5	32	58	1.4	273	0	1	2	0	1	0	0	0	0	0	0	0	0	3	47	27	14	10	0	0	1	0	0
77	1	25.333	73	74	20	100	36.33	35	3.5	10	8.8	197	12.1	14.7	137	4.3	1.4	10	204.822	26.6	0.9	0.7	16	23	1.1	188	0	1	1	0	0	0	1	0	0	1	0	0	0	1	39	30	15	11	0	0	0	1	0
59	1	20.4436	104	67	18	92	36.94	16	1.9	8.42105	13.6	269	9.9	22.1	137	3.7	5.7	17.6	214	32.7	1.6	4.3	18	61	0.9	221	0	1	3	1	0	0	0	1	0	0	0	1	0	11	63	44	15	2	1	0	1	1	1
23	2	21.9723	112	67	21	100	36.78	18	3.1	5.80645	6.8	49	7.3	14.9	147	4	3.5	18.6	175	41.3	1.7	5.4	49	287	0.6	453	1	1	3	1	0	0	0	1	1	0	0	1	0	9	40	34	15	3	1	1	0	1	1
46	2	21.551	57	83	13	90	36.94	13	2.6	5	7.9	169	7.9	22.4	142	4.3	2.5	11.8	197	49	1.1	0.9	56	39	0.7	282	1	0	0	0	1	0	0	0	1	0	0	1	0	1	23	15	15	3	1	1	1	1	1
42	1	32.526	101	74	18	100	37.39	3	2.4	1.25	6.5	129	6.4	18.9	142	2.5	2.1	14.9	204.822	30.6	1.3	9.3	81	318	0.7	583	0	1	1	1	0	0	0	1	1	0	0	0	1	8	60	36	15	3	0	0	0	0	0
68	2	37.4006	71	71	12	100	36.61	57	2.6	21.9231	6.8	133	7.7	16.6	141	4.2	3.21904	26.4	204.822	46.6	2.4	0.7	15	35	5.2	303	0	0	0	1	0	1	1	1	1	1	0	1	0	8	46	24	11	11	0	0	1	0	0
65	2	25.8645	106	74	15	93	36.44	47	2.3	20.4348	17	281	10.8	20.5	131	5.5	2.7	31.9	325	98.2	2.9	0.4	31	62	4.8	327	0	1	3	1	0	0	1	0	0	0	0	1	0	9	84	34	14	11	0	0	1	1	1
77	1	46.7952	75	72	20	93	36.33	54	3.8	14.2105	8.7	152	8.5	17.4	132	5.1	1.5	34.1	204.822	35.2	3.1	0.3	5	12	2	298	0	1	1	0	0	1	1	1	1	0	1	1	0	6	67	22	15	10	0	0	1	0	0
58	1	29.6202	80	104	19	99	36.83	14	2.5	5.6	7.4	92	9	14.6	144	2.5	2.1	20.2	204.822	35.6	1.8	1.7	15	29	0.4	482.686	1	1	2	1	0	1	0	0	0	0	0	0	1	5	46	34	15	6	0	0	1	1	1
62	2	17.4497	93	110	15	100	36.72	29	2.7	10.7407	11.3	69	9.2	20	137	3.9	4.4	24.3	157	38.8	2.2	10.2	1866	3698	1	275	0	1	3	1	0	0	0	1	1	0	0	0	0	8	57	28	15	6	0	0	1	0	0
38	1	66.6021	71	88	19	99	36.72	32	3.3	9.69697	7	48	7.3	29.2	133	4	1.4	18.8	205	27.8	1.7	5.1	25	111	1.6	241	0	1	3	1	1	0	0	1	1	0	0	1	0	7	46	26	13	3	0	0	1	1	1
75	2	25.7228	85	87	22	100	36.83	27	2.4	11.25	8.4	130	6.2	17.1	131	4.3	3.21904	29.9	251	31.8	2.7	4.8	29	38	1.3	482.686	1	1	2	1	0	0	1	0	0	0	0	1	1	4	31	31	14	11	1	0	1	1	1
58	2	38.5251	95	94	17	99	36.94	53	4.2	12.619	7.8	48	6.2	17.8	140	4.4	2.5	21	314	40.5	1.9	26.7	65	161	2.1	155	0	1	2	1	0	0	0	1	0	0	0	1	0	11	59	26	14	4	0	0	0	1	0
47	2	48.7883	105	77	24	96	37.44	65	1.8	36.1111	55.8	208	10.4	16.8	120	5.3	1.3	22.1	183	42	2	12	186	643	3.4	279	0	1	2	1	1	0	0	0	0	1	0	0	0	8	94	31	15	3	0	0	1	1	1
51	1	24.8016	76	60	23	97	36.78	15	2.2	6.81818	8.2	74	11	17.8	133	4.8	2.1	25	95	150	2.4	7.6	20	35	1.1	159	0	0	0	1	0	0	0	0	0	0	0	1	0	13	56	24	14	4	0	0	1	1	1
67	1	23.6678	109	69	19	95	36.67	75	2.7	27.7778	8.3	34	7.5	25.8	131	4.2	4.4	20.3	85	61.4	1.9	11.2	41	52	1.4	179	0	1	2	1	0	1	0	0	0	0	0	1	1	9	67	31	14	8	1	1	1	1	1
55	2	33.9592	76	87	18	99	36.94	14	3.5	4	8.1	77	11.5	18.6	143	4.1	1.1	20	432	40	2	3.5	22	92	1.4	351	0	1	2	1	0	0	1	0	1	1	0	1	0	9	23	25	15	4	1	0	0	0	0
54	2	35.2952	123	63	21	100	35	96	3.6	26.6667	15.8	282	13	13.9	132	4.2	2.6	19.8	204.822	35.9	1.9	1.1	2360	1370	2.6	1311	0	1	2	1	1	0	1	0	0	0	0	1	0	6	65	47	14	4	0	0	0	0	0
59	2	24.1959	64	107	18	100	36.33	18	2.7	6.66667	8.4	101	10.3	16.2	139	4.7	1.6	26.4	195	35.1	2.4	6.3	158	331	0.6	364	1	1	2	1	0	0	0	1	0	0	0	1	0	11	32	34	15	4	1	0	1	1	1
78	2	23.5429	111	74	20	96	36.06	53	3.8	13.9474	19.7	334	16.2	14.4	128	5.1	1.5	18	330	145.9	1.6	0.9	497	523	1.3	824	0	1	1	1	0	0	1	0	0	0	0	1	0	2	53	38	15	5	0	0	1	1	1
67	2	23.3211	121	74	35	100	39.44	95	3	31.6667	1.9	54	7.2	21.6	129	2.3	1.6	21.5	258	33.4	2	1.3	164	194	4.1	370	0	0	0	1	0	0	0	0	0	0	0	0	0	8	72	32	15	3	0	0	0	0	0
58	2	56.4014	107	55	19	90	36.83	67	2.8	23.9286	9.8	55	8.9	15.6	135	4.2	2.9	14.5	222	31.7	1.3	1.6	53	89	1.1	472	0	1	2	0	1	1	0	0	0	0	0	0	0	5	44	35	15	3	1	1	0	0	0
62	1	17.5779	74	59	11	92	35.83	16	3.2	5	13.5	368	10.9	16.4	143	4.3	3.21904	36.5	204.822	39.1	3.7	0.5	23	46	0.9	482.686	0	0	0	0	0	0	1	0	0	0	0	0	0	1	39	28	15	5	0	0	1	0	0
56	1	21.1073	121	76	22	97	37.17	19	4.1	4.63415	3.9	81	8.9	19.6	143	3.4	2.1	15.1	204.822	39.6	1.4	3.7	22	44	0.7	136	1	1	3	0	0	0	0	0	0	0	0	1	0	11	73	49	7	6	0	0	1	1	1
38	2	31.2461	70	58	17	97	36.94	95	2.6	36.5385	23.9	93	5.9	21	136	5	2.4	24.3	105	42.6	2.2	35.8	71	116	3.9	166	0	1	3	1	1	0	0	1	0	0	0	1	0	14	79	38	15	3	1	0	1	1	1
62	1	25.3778	80	80	20	97	35.67	39	2.3	16.9565	23	197	7.4	19.7	142	3.7	1.9	13.1	204.822	29.2	1.2	1.2	44	101	1.1	463	0	0	0	1	0	0	0	0	1	0	0	0	0	5	41	31	15	6	0	0	1	0	0
58	2	33.7656	83	74	17	96	37	24	3.6	6.66667	9.7	133	10.2	19.3	135	3.3	1	17.6	204.822	58.9	1.6	31.8	55	98	1.1	140	0	1	2	0	0	0	0	1	0	0	0	1	0	7	48	38	14	4	0	0	1	1	1
43	1	40.4266	96	63	20	96	37.22	13	2.5	5.2	19.1	156	8.5	17.8	136	4.1	3.21904	21.8	204.822	35	2	16.1	45	120	1.2	298	0	1	3	0	0	0	0	1	0	0	0	1	1	9	83	38	15	4	0	0	0	1	0
63	2	26.0135	102	112	18	97	36.5	13	2.4	5.41667	13.3	206	12.9	12.4	139	4.6	3.21904	13.6	204.822	22.9	1.3	18	53	89	0.5	482.686	0	1	2	0	1	1	0	1	1	0	0	0	0	1	30	30	15	4	0	0	1	1	1
59	1	20.4082	94	63	12	97	36.83	7	2.2	3.18182	7.4	71	5.8	12.9	115	3.1	1	17.5	204.822	38.9	1.6	4.2	30	104	0.3	269	0	1	3	0	0	0	1	0	1	0	0	1	0	6	49	26	14	3	0	0	1	0	0
44	1	41.7021	117	71	14	93	36.72	35	3.3	10.6061	16.3	213	9.5	14.2	135	4.8	13.1	20.8	253	53.3	1.9	2.5	15	52	1.7	313	0	1	3	1	0	0	0	1	1	0	0	1	0	5	52	34	14	4	0	0	1	1	1
63	2	34.6318	106	78	17	99	36.94	12	2.8	4.28571	10	87	12.7	17.5	135	3.7	1.4	15.3	439	30.7	1.4	4.4	20	85	0.7	361	0	1	3	1	0	0	0	1	1	0	0	1	0	8	27	34	15	6	0	0	0	0	0
64	2	26.5759	104	82	33	100	36.44	26	2.2	11.8182	10.2	100	9.2	20.9	136	3.8	2.1	15.8	201	35.8	1.4	5.9	21	38	0.6	270	1	1	2	1	1	0	0	0	1	0	0	0	0	11	65	35	15	7	1	1	0	1	1
42	1	43.4528	101	79	22	100	37.17	14	2.3	6.08696	12.9	131	12	15.4	140	3.7	4.3	20.3	204.822	42.8	1.9	3.2	40	125	0.8	416	0	1	2	1	0	0	1	0	1	0	0	1	0	10	69	34	15	4	0	0	0	0	0
59	2	24.9925	87	68	21	100	37.06	28	2.5	11.2	6.6	61	8.9	15.5	134	4	3.21904	20.4	204.822	49.9	1.9	2.3	10	20	0.5	111	0	1	2	0	1	0	0	0	0	0	0	1	1	6	54	29	14	5	0	0	0	1	0
75	2	20.5145	107	68	15	98	36.56	21	2.4	8.75	8	142	9.8	16.2	142	5.3	1.1	17.1	204.822	42.4	1.6	0.9	18	34	0.4	197	0	1	2	1	0	0	0	0	1	0	0	1	0	5	49	38	15	5	0	0	0	1	0
65	1	29.3772	86	82	24	95	36.61	12	2.4	5	4.7	196	12.1	16.7	143	4	3.21904	12.9	204.822	30	1.2	18	53	89	0.6	482.686	0	1	3	0	1	0	0	0	0	0	1	0	0	6	49	40	12	13	0	0	0	1	0
53	2	37.2623	100	110	33	97	37.56	8	3.3	2.42424	9.1	104	11	14.3	151	4.3	1.4	14.3	204.822	29.7	1.3	0.3	26	29	1.2	189	0	1	3	0	1	1	0	0	0	1	0	1	0	4	40	34	10	4	0	0	1	0	0
72	1	37.8072	80	77	16	100	36.5	43	3.9	11.0256	9.8	159	6.3	13.8	135	5	4.8	19.4	269	42	1.8	0.3	27	57	1.4	306	0	1	3	1	0	1	0	0	1	0	0	0	0	6	51	21	14	8	0	0	0	0	0
58	2	24.7444	98	93	21	95	36.39	12	3.4	3.52941	8.8	74	10.5	18.1	136	3	4.3	22.2	157	32.7	2	9.8	30	87	0.4	265	0	1	3	1	0	0	0	0	0	1	0	1	0	13	113	53	3	5	0	0	1	1	1
56	1	24.8016	109	78	18	95	36.83	26	3.1	8.3871	9.3	73	9.6	16.8	140	3.3	2.2	26	64	47.6	2.4	7	27	51	2	280	0	0	0	1	0	0	0	0	1	0	0	1	0	9	53	30	13	6	0	0	0	1	0
64	1	32.7261	64	91	23	93	36.78	13	2.2	5.90909	9.1	45	10.6	16	134	4.1	2.2	18.3	198	34.5	1.7	1.8	32	67	0.5	267	0	1	2	1	0	0	0	1	0	0	1	0	0	12	32	37	15	6	0	0	1	0	0
62	2	37.3059	52	63	22	97	30.22	12	2.1	5.71429	6.5	63	9.6	18.4	136	3.9	1.1	15.3	204.822	38.4	1.4	1	11	26	1.5	234	0	1	3	1	0	1	0	0	1	0	1	1	0	9	73	42	15	9	0	0	0	1	0
59	2	25.5456	85	72	16	94	36.06	16	2.4	6.66667	25.9	110	10.9	19.3	139	4.1	2.4	19.1	204.822	150	1.7	2.2	13	18	0.9	313	1	1	2	1	0	0	0	0	0	0	0	1	0	5	64	33	14	5	1	0	1	1	1
57	2	18.8112	94	97	17	92	36.89	5	2.4	2.08333	4.4	53	11.6	12.5	134	3.9	1.1	13.8	204.822	32	1.2	18	53	89	0.5	482.686	0	1	2	1	0	0	0	0	1	0	0	0	0	5	49	30	14	2	0	0	1	0	0
51	2	37.8401	86	65	32	100	36.83	25	2.4	10.4167	17.1	190	6.1	16.5	133	6.6	2	22.6	265	33	2.1	2.6	25	78	1.5	175	0	1	2	1	1	0	0	0	0	0	0	1	0	6	53	27	14	3	0	0	0	0	0
60	1	44.789	68	69	18	86	37	19	4.7	4.04255	7.4	142	7.5	15.6	142	3.6	2.2	23.3	204.822	43.3	2.2	9.8	31	60	1.5	308	1	1	2	0	0	0	0	0	1	0	0	1	0	13	82	49	7	6	0	0	0	1	1
52	1	22.9592	54	41	21	97	36.44	94	5.3	17.7358	7.5	65	8.3	15.9	125	4.2	3	34.3	94	72.9	3.3	38.5	22	59	6	265	1	1	3	1	0	0	0	1	0	0	0	1	1	13	95	29	15	4	1	1	1	1	1
63	2	27.648	104	84	24	95	36.83	12	3	4	3.9	66	10	19.4	137	3.6	3.21904	23.4	129	44.3	2.2	11.5	25	46	0.5	348	0	1	2	1	1	1	0	0	0	0	0	1	1	6	46	30	15	9	1	1	1	0	0
63	1	22.4059	97	67	16	100	36.89	7	3	2.33333	12.2	184	7.6	14.2	116	3.2	1.2	17.6	188	34.6	1.6	1.4	17	67	0.4	199	0	1	3	1	0	0	0	0	1	0	0	1	0	4	57	30	11	6	0	0	1	1	1
77	2	28.6635	82	96	14	98	37	22	2.4	9.16667	7.9	265	10.5	15.5	138	3.9	1.6	13.1	204.822	30.5	1.2	1	12	18	1.2	124	0	0	0	0	0	0	0	0	0	0	0	0	0	5	43	37	14	6	0	0	1	0	0
61	2	28.642	88	62	16	100	35	25	3.2	7.8125	11.9	77	7	20.5	126	5.6	2.5	25.5	58	53.9	2.5	14	90	235	1.2	547	1	1	3	1	1	0	1	0	0	0	0	1	0	14	92	38	15	8	1	1	1	1	1
69	2	36.0854	82	81	22	100	37.33	17	2.7	6.2963	3.3	36	8.8	15.9	146	5.8	5.1	22.1	94	54.7	2	6.2	3132	6356	1.1	281	0	1	3	1	0	0	0	1	0	0	0	0	0	16	71	34	15	7	1	1	0	0	0
66	2	32.2195	128	76	18	97	36.78	111	3.7	30	15.5	66	6.3	19.5	126	4.7	3	23	94	57.1	2.1	10.6	54	53	4.2	288	0	1	3	1	1	0	0	0	1	1	0	1	0	10	98	34	15	6	1	1	1	1	1
52	1	26.6797	96	91	17	100	36.17	10	2.4	4.16667	3.3	82	10.6	18.6	142	3.5	2.6	17.4	227	36.9	1.6	12.4	694	1258	0.3	482.686	0	1	3	0	0	0	0	1	0	0	0	0	0	10	57	45	15	4	0	1	1	0	0
38	1	63.6692	87	73	19	96	39.5	43	2.8	15.3571	3.1	91	9.3	15.4	141	4.2	0.9	23.9	204.822	42.5	2.2	1	12	21	2.5	482.686	0	1	1	1	0	1	1	1	0	1	0	0	0	7	73	39	14	6	0	0	1	0	0
49	2	33.9073	80	62	23	96	36.83	38	3.8	10	12.8	71	5.6	21.9	132	4.6	4	44.7	51	77.3	4	32.9	269	776	3	384	1	1	3	1	0	0	0	0	0	0	0	1	0	11	70	27	15	4	1	1	0	1	1
58	2	23.8182	103	78	25	95	36.67	50	3.4	14.7059	10.9	80	9.4	14.6	127	3.9	1.8	22.2	204.822	39.6	2	1.9	21	44	2.1	328	0	1	3	1	0	0	1	0	1	0	0	1	0	18	101	41	3	7	0	0	1	1	1
28	2	24.9079	98	106	17	95	37.06	3	3.1	0.967742	11.4	92	11.2	18.5	121	3.1	1.1	24.7	204.822	52.5	2.3	17.8	40	230	0.5	348	0	1	3	0	0	0	0	1	0	0	0	1	1	7	45	28	13	3	1	0	1	1	1
58	2	29.5848	83	90	17	95	37.11	13	3.4	3.82353	2.3	44	10	16.8	143	4	5.8	14.7	204.822	26.7	1.4	1.4	21	40	0.8	172	1	1	2	1	0	0	0	1	0	0	0	1	0	4	23	24	15	2	0	0	1	1	1
55	2	41.4541	61	62	19	98	37.22	100	2.8	35.7143	1.6	19	8.3	21.5	132	4.7	1.1	21	108	50	2	2.3	37	51	3	154	1	1	3	1	0	1	0	0	0	0	0	1	1	10	70	33	15	7	1	1	1	1	1
72	2	18.176	92	99	10	97	36.72	27	2.4	11.25	3.3	127	10.2	15	144	3	1.6	13.7	204.822	33.3	1.3	1.6	14	42	2.4	325	1	0	0	1	0	0	1	0	0	0	0	0	0	8	79	43	7	9	0	0	1	1	1
62	2	28.3624	91	74	36	100	38	24	2.4	10	3.1	101	8	14.1	130	5.4	0.9	13.2	204.822	24.1	1.1	0.3	26	26	1.2	489	0	1	2	1	1	0	0	0	1	0	0	0	0	5	47	31	14	5	0	0	1	1	1
75	1	35.2617	97	51	23	94	36.22	13	2.6	5	8.8	85	10.2	17.9	138	4.2	1.3	12.2	630	35	1	3.1	102	160	0.5	221	0	1	2	1	0	0	0	0	1	1	1	0	0	11	44	35	15	6	0	0	0	0	0
57	2	32.5609	89	85	19	100	37.06	10	2.9	3.44828	5.1	80	10.8	14.3	137	3.9	3.21904	14.3	441	32	1.3	1.4	15	21	0.5	198	0	0	0	0	1	0	0	0	0	0	0	0	0	4	17	22	14	6	0	0	1	0	0
55	2	33.1278	128	81	13	94	35.83	40	3.3	12.1212	10.8	157	10.5	16.8	136	4.4	4.7	31.2	140	36.2	2.9	12.2	21	58	1.8	303	1	1	3	1	0	0	0	0	1	0	0	1	0	16	85	46	15	4	0	0	1	1	1
64	1	44.1482	78	107	18	98	37	34	3.9	8.71795	5.8	103	13.4	17.8	137	3.6	1.8	18.2	204.822	35.2	1.7	4.1	20	43	1.1	340	0	0	0	0	0	0	1	0	0	0	1	0	0	5	35	22	15	5	0	0	1	0	0
39	1	34.8994	92	68	18	94	36.39	59	2.5	23.6	23.5	135	7.5	23.3	140	3.8	1.2	36.2	215	75.8	3.3	24.7	78	251	2.7	230	0	1	3	1	0	0	0	1	0	0	0	1	0	12	60	28	14	3	0	0	1	1	1
69	1	21.2277	103	57	31	94	36.67	21	3.8	5.52632	62.6	251	11.3	16.9	126	3.7	2.4	19.4	157	38.6	1.8	4	31	43	1	344	0	1	3	1	0	0	0	0	1	0	0	1	0	10	70	44	15	3	0	0	1	1	1
66	2	24.9037	138	75	24	100	37.28	57	3.4	16.7647	12.6	136	13.3	22.2	149	3.5	2.3	38.8	529	42.3	3.5	0.6	41	117	2.5	653	0	1	3	1	0	0	1	0	1	0	0	0	0	11	69	38	15	9	1	0	1	1	1
75	2	30.6831	75	57	16	96	37.06	19	2.4	7.91667	31.7	165	11.5	16.6	139	4.3	2.1	15.4	204.822	42.5	1.4	3.8	29	54	0.8	482.686	1	1	2	1	0	0	1	0	1	0	0	1	0	12	73	40	10	7	0	0	1	1	1
63	2	24.8016	63	101	18	95	36.72	6	3.1	1.93548	4.9	92	12.4	14.7	142	3.9	3.21904	13.6	426	120.3	1.3	0.7	30	36	0.5	334	1	1	1	0	1	1	0	0	0	1	0	1	0	2	19	18	15	7	0	0	1	1	1
48	1	30.0572	110	55	24	100	36.5	36	2.5	14.4	15.2	58	8	21.8	136	3.9	2.2	16.8	276	44	1.5	6.3	37	92	1.4	370	1	1	3	1	0	1	0	1	1	0	0	1	0	11	76	40	15	6	0	0	0	1	1
62	2	35.6176	109	67	23	99	37.17	41	3.7	11.0811	13.7	135	7.4	18	128	4.4	1.3	16.2	162	21.4	1.5	2	146	219	1.3	438	1	1	2	1	1	1	0	1	1	1	1	1	0	11	47	33	15	7	1	1	0	1	1
79	2	29.9308	85	68	30	93	37.44	19	2.9	6.55172	16	89	12.6	13.2	138	3.6	2.6	15.1	462	48.9	1.4	0.8	20	27	0.7	274	0	1	3	1	0	0	0	0	1	0	0	0	0	5	44	35	14	4	0	0	1	0	0
62	1	21.7815	80	104	18	87	36.94	43	2.4	17.9167	5.9	132	9.2	12.3	139	4.1	1.8	13	204.822	27.6	1.2	0.5	13	11	1.8	159	0	1	3	1	0	0	0	0	1	0	0	1	0	5	61	26	14	3	0	0	1	1	1
70	2	25.9516	76	67	17	97	35.22	56	3.6	15.5556	9.8	169	10.8	16.1	138	5.1	3.1	22.5	142	35.6	2.2	0.9	58	60	3.1	323	1	1	3	1	0	1	1	0	1	1	0	1	1	6	66	39	13	13	0	0	0	1	1
54	2	26.1719	78	72	15	100	37.11	29	2.4	12.0833	5.4	71	8.4	16.9	131	4.3	3.21904	15.8	204.822	30.9	1.5	1.6	20	31	0.9	482.686	1	1	1	1	0	0	0	0	0	0	0	0	0	4	40	26	15	11	0	0	1	1	1
40	2	33.564	95	73	16	100	36.67	13	2.7	4.81481	23.1	90	8	18.6	127	3.8	5.5	35.6	68	76.4	3.2	18.7	39	79	0.7	213	1	1	3	1	1	0	0	0	0	0	0	1	0	10	96	34	14	3	1	1	1	1	0
78	1	21.4533	97	57	14	92	36.39	8	2.1	3.80952	9.8	72	7.7	17	119	4	2	32.2	54	49.8	2.9	14.3	26	54	0.9	420	0	1	2	1	1	0	0	0	1	0	0	1	0	7	65	35	15	6	0	0	0	1	0
65	1	30.6477	71	76	20	100	36.17	30	3.2	9.375	9.5	120	11.4	15.6	129	3.9	2.4	16.7	204.822	33.9	1.5	1.8	47	68	1.5	225	0	1	3	1	1	1	0	1	1	0	0	0	1	7	35	26	15	6	0	0	0	0	0
51	1	39.6471	95	92	13	97	36.61	33	3.4	9.70588	15.4	71	7.7	19.2	148	3.4	1.8	20.3	211	42.7	1.9	22	120	181	1	241	0	1	3	1	0	0	0	1	1	1	0	1	0	7	56	32	14	4	0	0	1	1	1
35	1	22.4632	90	72	20	96	36.67	23	2.3	10	14.3	158	8.6	18.3	122	4.5	2.9	18.5	204.822	49.8	1.7	17.9	82	369	1.3	555	0	1	2	1	0	0	0	1	1	0	0	1	0	7	61	23	15	3	0	0	0	1	0
78	2	22.3037	85	68	36	92	37.22	53	2.6	20.3846	5	46	7.2	21.5	139	4.4	1.5	12.5	204.822	34.6	1.2	0.7	33	76	1.2	531	0	1	1	1	0	1	0	0	1	0	0	0	1	7	64	28	15	9	0	1	1	0	0
56	1	23.03	147	94	21	94	39.22	23	2.4	9.58333	8.5	76	7.9	19.4	137	4	2	15.6	395	36.9	1.4	2.5	35	59	0.7	482.686	0	1	1	1	0	0	0	0	1	0	0	0	0	12	61	55	6	4	1	1	1	0	0
49	2	23.1363	76	80	13	100	36.83	31	3.4	9.11765	6.2	61	8.3	13.8	113	6	3.21904	21.9	102	98.2	2	5.9	59	160	1.5	181	0	1	1	1	0	0	0	0	1	0	1	1	0	7	58	19	15	4	0	0	0	0	0
73	2	24.1638	108	92	19	94	35.72	8	2.9	2.75862	13.2	191	10.4	14.9	134	3.4	1.2	17.9	204.822	36.5	1.6	0.7	15	33	0.7	127	0	0	0	1	0	0	1	0	0	0	0	0	0	1	21	24	15	7	0	0	1	1	1
64	2	43.7703	68	143	19	100	36.5	43	2.9	14.8276	8.6	242	5.4	15.8	126	5.8	2.8	15	204.822	34.6	1.4	0.5	53	54	1.9	252	1	1	3	1	0	1	0	1	0	1	1	1	0	10	74	41	15	11	0	0	1	1	1
71	1	23.5969	90	90	17	94	37	49	4.1	11.9512	13.4	84	8.7	16.1	128	5.1	1.2	45.5	249	41.8	4.1	3.9	17	55	2.2	482.686	0	1	2	1	0	1	0	0	0	0	0	1	0	9	48	23	13	7	0	0	1	0	0
47	2	43.0018	74	65	18	98	36.56	93	3.1	30	5.4	36	9.1	16.7	139	4.3	1.1	14.8	173	30.9	1.4	6.2	60	97	4.2	171	0	1	3	1	0	0	0	0	1	0	0	0	1	10	44	31	15	6	0	1	0	1	0
44	1	28.2284	102	108	18	100	36.61	8	2.5	3.2	17.5	70	8	17.9	135	5.4	3.8	20.4	181	40.7	1.9	5.9	276	624	0.5	370	0	1	3	1	0	0	0	0	1	0	0	1	0	7	49	22	15	4	0	0	0	0	0
77	1	26.644	126	65	28	95	36.17	25	2.8	8.92857	4.3	68	9.7	13.9	137	4	1	15.4	204.822	35.3	1.4	0.3	11	24	4.9	243	0	1	3	0	0	1	1	0	0	1	0	0	0	8	62	33	11	16	0	0	1	0	0
36	2	27.6361	118	54	34	100	36.5	12	2.8	4.28571	4.3	14	8.5	24.5	135	2.9	5.6	40.1	45	84.6	3.6	5.6	46	74	1.1	179	0	1	1	1	0	0	0	1	1	0	0	0	0	12	68	27	15	3	1	1	0	0	0
46	1	35.8206	91	75	16	97	36.44	78	3	26	34.7	429	8	18.6	141	4	1.4	18.8	204.822	33	1.8	3.1	120	257	1.5	482.686	0	0	0	0	0	0	0	1	0	0	0	0	1	3	69	38	14	5	0	0	0	0	0
59	2	27.203	102	88	18	97	36.78	21	2.5	8.4	14.5	124	10.7	16.5	139	5.1	10.4	15.9	164	37.3	1.5	2.8	407	588	1.2	380	1	1	2	1	0	0	0	0	0	1	0	1	0	8	56	29	15	7	0	1	0	1	1
79	2	37.0983	63	42	41	97	34.33	71	3.1	22.9032	8.8	127	6.9	14.2	126	5.8	3.1	21.2	161	54.4	1.9	1.1	11	18	6.4	146	0	1	3	0	1	0	1	0	0	1	0	1	0	11	76	52	14	9	1	1	0	1	0
70	2	31.3723	99	94	22	96	37.22	33	2.6	12.6923	14.9	149	10.7	13	138	4.7	2.7	16.8	282	30	1.6	1.6	49	54	1.2	274	0	1	2	1	1	1	0	0	1	0	0	0	0	8	59	33	14	7	0	0	0	0	0
32	1	26.0417	100	65	21	95	36.11	89	3.4	26.1765	26.6	43	7.3	17.2	140	3.8	0.9	36.4	100	96.9	3.3	29.4	83	115	2.3	291	0	1	2	0	1	0	0	1	1	0	0	1	0	16	108	37	5	3	0	0	1	1	1
56	2	21.4174	105	89	22	100	36.61	44	2.7	16.2963	8.4	113	10.8	13.7	125	2.8	5.2	21.8	230	31.4	2	1.1	28	62	2.7	343	0	0	0	1	0	0	0	0	0	0	0	1	0	9	59	32	15	2	1	1	0	1	0
38	2	45.0865	135	92	20	97	37.44	29	2.2	13.1818	24	203	10.4	13.3	143	4.3	1.5	15.6	214	22.4	1.4	0.7	24	36	1.1	482.686	0	1	2	1	0	0	1	1	0	0	0	0	0	9	74	44	13	3	0	0	1	0	0
52	1	30.9311	97	135	13	96	37.17	7	2.8	2.5	5.6	93	8.1	15.2	137	3.8	1	10.5	204.822	40	1	1.1	45	67	0.6	452	0	0	0	0	1	0	0	0	0	0	0	0	0	5	30	21	13	2	0	0	1	0	0
76	2	31.8878	93	86	35	98	35.22	21	2.7	7.77778	13.7	127	10.5	16.2	140	5.2	3.3	15.3	510	30.4	1.3	0.9	559	522	1.2	616	0	1	2	1	0	0	0	0	0	0	0	0	0	6	56	33	15	5	1	1	1	0	0
61	2	29.4029	101	64	16	97	36.72	10	1.8	5.55556	2.4	62	7.3	15.1	145	3.6	4.5	16.5	209	51.5	1.5	4.6	264	584	0.5	482.686	0	1	3	1	1	0	0	0	0	0	0	0	0	16	129	44	3	8	1	1	1	0	0
49	2	32.3661	93	114	15	100	35	42	1.7	24.7059	11.2	217	8.7	18.7	130	3.3	1.7	26.5	257	42.3	2.6	9.3	32	129	1.3	446	0	1	2	1	0	0	0	0	1	0	0	1	0	6	71	36	13	9	0	0	0	1	0
61	2	26.8745	84	75	21	92	38	20	2.3	8.69565	5.8	84	9.5	19.9	133	3.9	1.5	15	449	26.5	1.3	0.9	28	75	0.6	346	1	1	3	1	0	0	0	0	1	0	0	0	0	6	74	42	14	8	0	1	1	1	0
62	2	25.1797	115	94	20	93	37	11	3.1	3.54839	18.1	263	12	13.5	142	3.8	3.21904	13.4	204.822	27.8	1.2	3.4	58	54	0.7	288	0	1	2	1	0	0	0	0	0	0	0	0	0	2	40	29	15	5	0	0	0	1	0
55	1	21.9671	84	107	17	96	37.17	10	4	2.5	4.2	70	12.4	14.3	142	3.5	1.3	16.9	204.822	36.9	1.5	2.4	47	110	0.6	270	0	0	0	1	1	0	0	0	0	0	0	0	0	6	31	23	14	5	0	0	0	0	0
76	2	26.6794	39	73	15	99	36.44	59	3.5	16.8571	8.2	202	7.4	14	119	5.3	0.8	17.1	268	39.1	1.6	1.6	15	22	2.5	129	1	1	2	0	0	1	1	0	0	1	0	0	0	4	65	24	15	11	0	0	0	1	1
52	2	35.1331	103	64	17	96	38.61	21	2.6	8.07692	6.6	62	10.2	15.6	146	3.6	1.3	20.1	196	31.3	1.9	6.3	22	73	1	482.686	0	1	3	1	1	0	0	0	0	1	0	0	1	12	42	34	15	4	1	1	0	0	0
67	2	26.7299	73	97	22	98	36.83	139	2.8	49.6429	10.9	164	6.9	14.3	138	6.8	1.1	13.4	191	23.5	1.2	0.8	11	23	2.9	145	0	1	2	1	0	1	1	1	1	0	0	1	0	11	43	35	15	12	0	0	0	0	0
68	2	33.7133	82	88	27	93	36.83	21	4.2	5	13	68	9.3	16.6	135	4.5	2.5	25.1	153	55.1	2.3	6	21	37	1.3	206	0	1	3	1	0	0	1	0	0	0	0	1	0	11	44	40	14	7	1	0	1	0	0
57	1	36.4706	71	56	19	100	36.39	45	4.4	10.2273	15.9	99	7.8	14.7	131	4	1.4	35.8	139	48.2	3.3	27.5	14	42	2.1	220	0	1	3	1	1	0	0	1	0	1	0	1	0	13	72	30	15	4	0	0	1	1	1
67	2	25.712	89	81	14	95	36.83	40	2.5	16	10.1	96	7.9	15.3	136	4.3	3.21904	19.7	204.822	31.3	1.8	2.5	64	85	0.9	185	1	1	3	0	0	0	0	0	0	0	0	1	0	5	51	24	15	6	0	0	1	1	1
64	2	28.4735	108	89	33	100	36.22	107	2.4	44.5833	12.5	39	7	21.7	140	6.5	1	23.5	134	41.3	2.2	14.9	30	85	1.2	215	1	1	3	1	1	1	0	0	1	0	0	1	0	16	68	41	15	6	1	1	1	1	1
59	1	26.2976	77	66	16	100	37	29	3.3	8.78788	18.7	184	9.1	14.7	129	4.1	1.5	20.2	204.822	38.5	1.8	2.1	11	58	0.6	174	0	1	2	1	0	0	0	0	0	0	0	1	0	3	38	37	15	4	0	0	0	0	0
70	2	22.9321	179	112	16	100	36.94	117	2.4	48.75	34.8	154	9.2	19.9	128	5.6	2.7	42.5	204.822	61	3.9	4.3	12	25	2.4	482.686	1	1	1	1	0	1	0	1	0	0	0	1	0	16	123	58	4	8	1	0	1	1	1
70	2	31.3209	93	71	19	90	36.39	93	4	23.25	14	55	5.8	14	111	3.5	3.6	23	296	50.6	2.1	2	135	325	5.6	683	0	1	3	1	1	1	0	1	0	1	0	1	0	10	68	24	12	8	0	0	1	1	1
51	2	18.6632	109	74	30	100	37.28	53	2.2	24.0909	4	53	6.2	14.5	127	3.8	3.6	17.4	1126	36.6	1.6	2.1	39	229	2.5	481	0	0	0	1	0	0	0	1	0	1	0	0	0	8	58	30	14	3	0	0	1	0	0
57	1	30.6477	113	67	19	100	37.5	20	2.4	8.33333	6.5	383	8.4	13.3	141	5.1	1	15.1	204.822	31.7	1.3	1	14	45	1.2	482.686	0	0	0	1	0	1	0	0	1	0	0	0	0	3	34	23	13	3	0	0	0	0	0
70	1	17.7154	126	82	11	90	36.17	25	2.4	10.4167	12.7	160	11	19	141	3.8	2.3	26.1	204.822	40.1	2.6	33.9	112	136	0.8	482.686	0	1	2	1	0	0	0	1	0	0	0	0	0	7	69	28	15	4	0	0	1	1	1
56	1	33.2341	106	89	18	93	37	24	3.3	7.27273	13.2	144	11.4	17.5	140	5	1.1	14.4	204.822	26.3	1.3	1.7	31	84	0.7	376	1	1	3	1	1	0	0	1	0	0	0	0	1	4	30	34	14	5	0	0	0	1	1
55	2	55.6264	85	82	16	95	36.83	38	3	12.6667	13.7	208	7.4	16.4	131	3.9	1.5	20.7	204.822	103	1.9	3.2	104	305	2.2	646	1	1	3	1	0	0	1	0	1	0	0	1	0	8	66	24	15	8	1	0	1	1	1
42	2	30.3395	125	82	36	96	37.94	40	2.2	18.1818	16.1	52	7.8	16.8	142	4.9	11.3	39.3	103	43.8	3.7	8.6	869	2694	6.4	298	1	1	3	1	1	0	0	1	1	0	0	1	1	18	97	46	15	3	1	1	1	1	0
58	1	31.5689	120	83	27	93	36.89	7	1.7	4.11765	11	145	10.7	13.4	133	4.4	2.2	20	204.822	40	2	7.9	51	101	0.6	806	0	1	3	1	1	0	0	1	0	0	0	1	1	12	86	53	14	5	1	0	1	1	1
44	1	17.0068	79	84	22	100	33.89	61	2.6	23.4615	4.9	87	11	14.5	140	3.8	2.4	11.3	228	24.2	1	0.8	25	61	5.4	482.686	0	0	0	1	0	0	0	0	0	0	0	0	0	9	59	25	15	5	0	1	1	0	0
50	2	26.2663	81	100	14	100	36.28	28	1.9	14.7368	5.8	59	8.4	16.4	138	4.9	1.2	20	143	40	2	1.9	516	1071	3.8	325	0	1	3	1	0	1	0	0	0	0	0	1	0	9	60	37	15	9	1	1	1	0	0
75	1	53.4435	98	39	16	94	38	44	3.9	11.2821	30.7	199	9.4	17.1	140	4.8	9.6	26.3	204.822	61	2.4	4.4	13	33	1.9	153	0	1	3	1	0	0	0	1	0	0	0	1	0	15	99	46	13	6	0	0	1	1	1
63	2	33.6455	85	51	10	96	36.78	20	2.4	8.33333	8.6	266	14.1	13.7	136	5.2	1.4	14.3	204.822	28.4	1.2	0.7	12	34	1.5	292	0	1	2	0	1	1	0	0	0	0	0	0	0	3	50	30	14	7	0	0	0	1	0
53	2	35.3777	112	85	28	100	37	38	3	12.6667	9.8	13	8.4	18.1	141	4.3	2.1	15.6	463	29.1	1.4	2.1	12	20	1.5	288	0	1	3	1	0	0	1	0	1	0	0	1	0	15	49	38	12	8	0	1	1	1	1
57	2	32.5551	97	104	18	95	39.06	18	2.8	6.42857	6.1	81	9.1	16	135	3.8	3.21904	17.7	204.822	36	1.6	2.5	38	48	0.7	231	0	1	2	1	0	0	0	0	0	0	0	1	0	8	65	28	9	2	1	1	1	0	0
58	2	25.3934	68	53	12	97	36.33	31	2.2	14.0909	4.6	88	12.3	16.6	127	5.3	1.1	18.1	172	53.9	1.7	2.2	24	44	0.9	182	0	1	2	1	1	0	0	0	0	0	0	1	1	5	52	28	14	5	0	0	1	1	1
52	1	15.2353	73	78	22	99	36.67	35	2.4	14.5833	15.6	148	13.1	17.3	138	5	4.6	10.8	204.822	24.4	1	0.4	53	13	6.6	482.686	0	1	3	1	0	0	0	1	0	0	0	0	0	5	53	25	15	4	0	0	0	0	0
65	2	21.6358	77	94	16	99	37	35	3.5	10	3.3	78	9.2	17.4	142	4.2	1.8	14.8	251	35.4	1.4	1.1	12	25	2.2	169	1	1	3	1	0	0	0	0	1	0	0	1	0	6	44	48	10	7	0	0	0	1	1
58	2	41.977	82	92	30	97	36.72	13	2.8	4.64286	8.8	55	10.4	15	144	4.5	2.5	26.3	204.822	150	2.5	6.1	34	55	1.1	357	0	1	3	1	1	0	0	0	1	0	0	1	0	18	66	44	12	2	0	0	1	1	1
34	1	18.9164	120	66	23	92	37.06	10	3.8	2.63158	21.3	254	8.6	18	134	3.6	1.9	21.3	204.822	54.7	1.9	1	309	597	0.5	323	0	1	1	0	0	0	0	0	1	0	0	1	0	1	39	32	15	3	0	0	0	0	0
51	2	72.4417	100	93	22	94	36.89	68	3	22.6667	10.8	148	11.6	18.7	130	4.5	2.6	18.8	204.822	33.1	1.7	19.1	92	106	6.3	661	0	1	3	1	0	0	0	1	0	0	0	0	0	10	90	31	15	2	0	0	0	1	0
65	1	37.732	91	74	20	100	37.72	28	3.5	8	15.4	152	9.7	12.6	135	4.2	1.8	11.9	204.822	29.2	1.1	0.2	7	17	1.5	219	0	1	2	1	0	1	1	0	1	1	0	0	0	3	46	32	15	5	0	0	0	0	0
59	2	34.4388	102	106	7	98	38.17	21	2.9	7.24138	7.6	68	10.3	16.1	142	3.9	3.7	18.1	174	44.2	1.6	2.7	649	2244	0.8	482.686	0	1	1	1	1	0	0	0	0	0	0	0	0	9	30	28	15	2	0	1	0	0	0
72	2	29.668	138	96	19	98	36.72	15	2.4	6.25	7.9	318	8.1	14.8	132	4.1	1.2	15	204.822	26.2	1.4	18	53	89	0.7	482.686	0	1	2	0	1	0	1	0	0	0	0	0	0	2	37	28	13	8	0	0	1	0	0
65	1	31.2771	124	75	17	100	36.06	40	3.1	12.9032	12.8	107	9.6	18.2	140	3.8	8.3	18.6	217	31.6	1.7	16.7	85	341	1	495	1	1	2	1	1	0	0	1	0	0	0	1	1	11	75	47	15	5	1	0	1	1	1
52	2	32.2402	128	66	23	98	36.5	46	3.5	13.1429	16.1	96	6.7	16.2	125	5.6	7.4	23.8	145	38.1	2.2	3.5	37	124	3.6	271	0	1	3	1	0	0	0	0	0	0	0	1	0	15	72	43	15	6	1	0	1	1	0
61	2	30.6831	111	54	22	95	36.67	49	4.1	11.9512	11	65	9.8	26.5	128	2.9	7.5	20	176	40	2	10.4	20	110	2.3	346	0	1	1	1	1	1	0	1	1	0	0	1	0	13	78	28	11	6	0	0	1	1	1
61	2	32.4192	58	67	14	100	37.17	51	2.1	24.2857	1.5	20	7.6	17.8	136	3.5	1.9	13.7	204.822	30.9	1.3	0.5	39	85	8.3	482.686	0	1	3	1	0	1	0	0	0	0	0	1	1	9	76	46	15	8	0	1	0	1	0
52	2	26.6965	106	66	8	100	36.56	26	3	8.66667	10.7	111	9.4	16.3	146	4.9	17.4	17.3	213	32.3	1.6	1.6	166	878	2.1	2247	1	1	3	1	0	0	0	1	1	0	0	1	0	18	94	54	12	4	1	0	1	1	1
64	1	25.255	118	68	36	98	36.5	69	3.1	22.2581	5.7	27	7.6	21.6	126	5	5.9	40.7	62	59	3.6	21.4	9	31	3	252	0	1	3	1	0	1	0	0	0	1	0	1	0	23	144	59	3	10	0	0	1	1	1
62	2	32.4454	69	72	17	93	37.17	54	2.8	19.2857	13.7	286	12.7	14.8	146	4.7	1.5	11.5	1182	35.2	1.1	0.7	52	42	2.5	180	0	1	2	1	0	1	0	0	1	1	0	1	0	9	64	33	15	8	0	0	0	1	0
56	2	30.5724	70	99	20	100	36.56	28	3.1	9.03226	5	89	9.8	14.3	140	3.9	1	15.7	277	31.5	1.4	4.9	403	910	2	501	0	1	2	1	0	1	0	1	0	0	0	0	0	9	45	31	15	9	1	1	1	0	0
65	2	25.6519	73	64	10	98	35.56	30	2	15	16.7	191	8.8	16.1	138	3.7	1.2	23.3	204.822	42.4	2.2	0.4	9	15	3.8	150	0	1	3	1	0	1	0	0	0	0	0	0	0	8	50	34	15	10	0	0	1	0	0
78	2	19.8413	36	52	29	89	37.17	87	3.6	24.1667	6.7	145	7.9	13.7	130	6.9	1.8	11.6	204.822	32.1	1.1	0.4	41	28	4.9	170	0	1	3	0	0	1	1	1	0	1	0	0	0	10	70	35	15	9	0	0	0	1	0
44	1	21.8963	97	82	24	96	37.06	82	3.6	22.7778	14.7	187	6.9	22.9	133	5	3.4	16.6	240	48.4	1.5	2.6	13	20	3.4	308	1	1	1	1	0	0	0	0	0	0	0	1	0	5	48	23	15	3	0	0	1	1	1
72	2	34.4022	68	72	12	98	36.72	34	3.3	10.303	12.7	166	11.2	15.7	132	3	3.1	12.6	204.822	34	1.2	0.4	32	118	1.4	482.686	0	1	3	1	0	0	0	0	1	0	0	0	0	9	47	34	15	9	0	0	0	1	0
68	1	24.9163	125	70	22	85	37.56	37	2.4	15.4167	16.7	345	10.6	16.9	142	4	2.2	13.8	204.822	51	1.3	0.6	47	78	1	482.686	0	1	3	1	0	1	0	0	1	0	0	0	0	6	52	45	15	5	0	0	1	0	0
54	1	29.9036	118	84	25	94	37	14	2.3	6.08696	6.5	90	10.2	15.6	143	4.2	3.5	23.2	93	49.8	2.2	13.2	440	622	0.6	449	0	1	3	1	0	0	0	0	0	0	0	1	1	11	71	38	15	4	1	1	1	1	1
55	1	22.8516	94	65	24	93	37.72	8	3.8	2.10526	2.3	109	8.5	16.7	131	4	1.1	19.7	83	73.8	1.8	4.7	62	151	0.6	142	0	1	2	1	0	0	0	0	1	0	0	1	0	11	47	27	14	2	0	1	0	0	0
58	2	23.8095	80	78	24	100	36.22	42	2.4	17.5	3.5	56	7.3	20.4	140	3.7	2	32.1	77	54.8	2.9	5.6	11	43	2.1	172	1	1	1	1	0	0	0	0	0	0	0	1	0	9	59	30	12	6	0	0	1	1	1
60	2	24.8016	123	72	18	100	36.83	5	3	1.66667	6.5	138	9.3	15.5	132	3.9	3.2	13.2	180	25.8	1.2	0.2	28	15	0.3	169	0	0	0	1	0	1	0	1	0	0	1	1	0	2	45	31	15	11	0	0	1	1	1
73	2	43.9342	51	91	15	97	36.28	84	2.5	33.6	5.6	146	7.7	24.3	138	5.7	1.9	18.8	204.822	42.2	1.7	1.8	53	68	3.7	470	0	1	2	0	0	1	1	1	0	1	0	1	0	7	54	21	15	12	0	0	0	1	0
66	1	33.6947	65	79	23	98	36.56	126	5	25.2	7	22	8.8	16.6	127	4	1.3	15.9	204.822	20.3	1.5	1.7	9	22	5.1	276	1	1	3	0	0	1	1	1	0	1	0	1	0	11	67	30	14	11	0	1	1	1	1
44	2	19.7516	87	108	20	100	37	30	2.7	11.1111	13.5	118	9	18.3	128	5.1	1.1	26.3	170	54.9	2.4	19	1314	1679	1.2	482.686	0	1	2	0	1	0	0	1	0	0	0	1	0	10	49	25	15	3	1	1	0	0	0
70	2	26.7299	63	66	22	98	36.5	41	3.7	11.0811	31.9	132	9.2	20.2	132	3.4	14.7	42.8	185	41.3	3.8	9.2	2311	4113	2.9	5060	0	1	2	1	0	0	1	0	0	0	0	0	0	15	67	31	15	11	1	0	0	0	0
42	2	55.2253	97	86	34	100	37.89	77	3.2	24.0625	13	77	7.1	17.7	139	3	1.6	17.5	204.822	42.5	1.6	4	21	50	4.1	267	0	1	2	0	0	0	1	0	0	0	0	0	1	9	60	28	14	6	0	0	0	0	0
69	2	64.307	82	87	19	100	36.56	42	2.4	17.5	6	61	8.5	20.8	135	4.3	3.21904	16.6	204.822	38.7	1.5	1.5	37	90	2.6	233	0	1	2	0	0	1	1	0	1	0	0	0	0	5	53	18	15	10	0	0	0	1	0
39	2	34.6268	93	86	14	95	36.94	5	3.8	1.31579	4.3	100	9.3	22.6	146	3.5	3.3	12.5	240	38.6	1.2	1.8	18	67	0.5	155	0	1	2	0	0	0	0	1	0	0	0	1	0	6	39	28	14	4	0	0	0	0	0
53	2	31.5101	75	67	28	99	35.72	17	3.3	5.15152	23.9	130	14.8	15.3	154	3.8	19.6	15.5	206	30.4	1.4	0.5	66	79	1.9	249	1	1	3	1	1	1	0	0	0	1	0	0	0	10	66	42	15	8	0	0	0	1	1
79	1	23.6678	76	73	20	95	36.83	98	2.7	36.2963	9.2	152	6.9	15.2	125	5.5	1	13.5	272	25.5	1.2	1.8	31	92	6.9	460	0	1	3	0	0	1	1	0	0	0	0	0	0	7	69	31	15	11	0	0	1	0	0
61	2	43.2256	102	117	13	96	36.78	37	1.9	19.4737	0.4	47	10.2	14.6	152	3.7	3.5	22	204.822	36.5	2.1	4.4	19	25	0.9	231	1	1	2	1	0	0	0	0	1	0	0	0	0	10	90	32	7	8	1	1	1	1	1
76	1	21.0105	109	86	28	98	37.5	20	2.8	7.14286	10.2	54	9.6	14.6	142	4.1	2.7	23	204.822	32.4	2.1	5.6	16	66	0.8	406	0	0	0	0	0	0	1	0	1	1	1	1	0	6	49	27	14	11	0	0	1	0	0
50	2	36.5469	75	81	19	100	36.56	15	2.9	5.17241	3.7	33	12.9	18.6	140	4	2.3	19.8	204.822	36.2	1.8	2.3	57	73	0.8	288	0	1	3	0	0	0	0	1	0	0	0	0	0	8	31	21	15	1	0	0	1	0	0
52	2	26.2346	89	92	16	97	37.44	12	3.1	3.87097	7.5	89	9.6	15	141	3.5	2.4	15.2	247	27	1.3	1.5	32	51	0.8	290	0	0	0	0	1	1	0	0	0	0	0	0	0	3	17	27	14	5	0	1	1	0	0
55	1	30.6831	82	64	19	96	36.89	43	2.1	20.4762	11.5	127	7.6	21.4	137	5.3	2	30.3	204.822	45.8	2.8	5.8	88	152	1	235	1	1	1	1	0	0	0	1	0	0	0	1	0	5	57	31	15	4	0	0	1	1	1
55	2	18.424	85	40	17	99	36.39	52	2	26	9.8	48	6.2	27.9	138	4.2	2.1	28.2	170	112.9	2.6	26.2	5	96	1.5	246	0	1	1	0	0	0	0	1	1	0	1	1	0	10	68	27	14	11	1	1	1	0	0
64	2	21.9753	87	76	15	100	37	54	3.2	16.875	17.6	136	8	23.6	136	3.2	2.9	22	111	32.7	2.1	6.9	48	94	2	318	1	0	0	1	1	0	0	0	0	0	0	1	1	7	58	31	15	6	0	0	1	1	1
51	1	24.9481	90	59	24	100	36.94	46	2.5	18.4	19.3	47	9.7	14.8	133	3.6	1.8	18.6	207	47.6	1.7	0.7	30	34	4.6	204	0	1	3	1	0	1	0	0	0	0	0	1	0	11	48	24	14	8	0	0	1	0	0
59	2	28.0556	109	76	20	100	37	22	2.4	9.16667	0.7	109	12	14	143	4.9	2.9	13.1	204.822	22.4	1.2	0.8	27	56	1.9	482.686	0	1	2	1	1	0	0	1	0	0	0	0	0	10	58	28	15	2	0	0	1	0	0
48	2	29.9383	98	75	17	93	37	74	3.2	23.125	9.7	149	8.9	15.7	128	5.4	0.6	11.7	204.822	32.1	1.1	0.3	107	280	6.7	1103	0	1	3	1	0	0	0	0	0	0	0	0	1	9	45	37	15	4	0	0	0	0	0
79	1	17.8571	81	44	19	100	36.28	43	2.1	20.4762	9.8	360	10.3	15.3	127	3.7	1.9	38.5	204.822	60.3	3.4	1.1	9	17	2.9	143	0	1	3	1	0	0	1	0	0	0	0	0	0	8	83	41	15	6	0	0	1	1	0
66	2	25.8645	45	90	12	100	36.39	28	3.9	7.17949	5.6	119	11.3	13.5	140	4.1	3.21904	11.3	366	28.8	1	0.8	14	31	1.7	232	0	1	2	1	0	0	0	1	0	0	0	1	0	4	46	24	14	12	0	0	0	0	0
78	1	31.3603	78	114	14	93	36.56	21	2.7	7.77778	9	279	10.2	13.9	130	4.6	0.9	66.2	782	47.7	6.2	0.2	24	56	0.9	577	0	1	3	1	0	0	1	0	1	1	0	1	0	5	40	36	15	9	0	0	1	1	1
79	1	38.0454	119	86	28	95	36.67	30	0.6	50	62.8	185	9.4	28.1	118	3	4.4	35.9	218	65.4	3.3	7.3	11	37	1.2	1959	0	1	3	1	1	0	0	1	1	0	0	1	0	13	126	54	14	6	0	0	1	1	1
63	2	22.7265	74	92	39	100	37.17	39	2.4	16.25	14.6	247	11.5	14.4	137	4.5	1	11.2	204.822	24.9	1	0.4	16	14	4.7	482.686	0	1	3	1	0	1	1	1	1	1	0	1	0	8	56	42	15	10	0	1	1	1	1
58	2	23.03	64	59	14	99	36.44	29	3	9.66667	18.8	497	9.1	17.3	138	2.7	1	14.4	204.822	21.8	1.3	3.4	14	43	0.7	482.686	0	1	1	1	1	0	0	0	0	0	0	0	0	7	43	33	15	2	0	0	0	0	0
57	1	42.1665	99	139	33	96	36.56	53	3.2	16.5625	13.3	64	10	19.4	153	3.2	2.9	29.1	176	66.7	2.7	4.6	39	65	1.6	371	0	1	2	1	0	0	1	1	1	0	0	1	1	14	89	42	6	8	1	1	1	1	1
53	1	21.5978	93	100	24	96	36.67	29	2.8	10.3571	13.8	265	6.8	16.8	137	4.4	3.21904	15	204.822	30.1	1.4	0.7	110	131	1.1	188	0	1	1	0	1	0	0	0	0	0	0	1	0	2	24	22	14	3	0	0	0	0	0
61	2	30.9551	64	76	15	98	36.67	19	2.6	7.30769	4.8	91	11.1	15	138	4	3.8	14.6	204.822	36.1	1.4	1.2	115	172	0.7	310	1	1	2	1	0	0	0	0	1	0	0	0	0	10	86	45	15	6	1	1	1	1	1
53	2	22.6757	97	113	16	100	36.94	14	2.4	5.83333	10.6	64	10.2	17.1	140	3.9	1.3	20.7	221	42	1.9	4.6	490	700	0.6	187	1	1	3	1	0	0	0	0	0	0	0	1	0	7	48	29	15	4	0	0	0	1	1
63	1	20.3373	71	68	21	100	36.61	13	2.3	5.65217	4.4	98	8.7	15.3	141	4.4	1.5	15.9	204.822	34.7	1.5	1	19	30	0.5	482.686	0	0	0	0	0	1	0	0	0	1	1	1	0	5	36	21	15	8	0	0	0	1	0
60	2	25.1559	93	121	23	100	36.5	14	2.7	5.18519	6.4	73	9.8	16.7	137	4.3	4.6	15	204.822	28.7	1.4	1.8	23	49	0.6	482.686	0	1	2	1	1	0	0	1	1	0	0	1	0	5	45	40	15	7	1	1	1	1	1
44	1	36.0258	95	92	13	100	36.72	5	3	1.66667	12.5	194	11.1	13.2	143	4.3	1.1	14.7	581	36.5	1.4	0.3	30	45	0.5	382	0	1	2	1	1	0	0	0	0	1	0	0	0	1	22	14	15	1	0	0	0	0	0
69	2	31.9468	85	82	24	89	36.44	29	4.8	6.04167	6.8	94	8.3	19.3	128	5	1.9	18.4	204.822	61.4	1.7	2.7	20	47	1.5	160	0	1	2	1	1	1	0	0	1	0	0	1	0	7	47	28	14	9	0	0	0	0	0
74	2	25.904	106	73	26	94	36.56	15	2.4	6.25	7.8	585	8.1	13.2	138	4.4	3.21904	11.6	204.822	36.7	1.1	18	53	89	0.9	482.686	0	1	2	0	0	1	0	0	1	0	0	0	0	5	53	28	8	7	0	0	0	0	0
51	2	35.7733	122	57	19	100	36.94	63	3	21	9.2	127	17	13.8	146	3.7	2.1	11.9	557	26.9	1.1	0.4	19	27	3.2	268	0	1	3	1	0	1	0	0	0	0	0	0	0	12	84	43	15	5	0	0	0	0	0
67	2	33.9813	76	63	16	100	37.5	32	2.3	13.913	15.6	113	10.9	20.6	140	6.3	2.9	15.5	104	30.8	1.4	3	31	104	1.3	348	1	1	2	1	0	0	0	1	1	0	0	0	0	11	43	37	15	7	0	0	1	1	1
68	2	22.0932	135	74	21	97	37.56	23	3.1	7.41935	21.2	226	14.6	15.6	135	5.3	3.21904	26.6	786	40.8	2.6	0.9	26	51	1	325	0	1	2	0	0	0	0	0	0	0	0	0	0	8	90	53	4	4	1	0	0	1	0
52	2	40.6379	92	67	23	99	36.39	50	3.2	15.625	4.9	17	8.1	19.9	119	5.5	6.2	30.3	94	69.4	2.8	37.1	57	280	7.2	545	1	1	3	1	0	1	1	1	0	0	0	1	0	16	78	22	15	9	1	1	1	1	0
60	2	29.2577	90	50	15	95	35.78	15	2.4	6.25	4.4	56	9.1	19.2	137	3.4	1.1	14.8	204.822	26.2	1.3	1.6	25	38	0.4	482.686	0	1	2	1	0	0	0	0	0	0	0	1	1	4	21	28	15	6	0	1	1	0	0
66	1	29.7784	78	72	13	100	36.39	23	2.7	8.51852	3.3	24	7.9	17.2	134	5.4	3.2	20.7	204.822	42.4	1.9	4.3	27	69	1.4	201	1	1	2	1	0	1	0	1	1	0	0	1	0	14	57	41	10	7	1	0	1	1	1
36	2	32.7735	61	68	20	95	36.5	115	3.8	30.2632	41	145	10.4	15.3	144	4.1	3.21904	35.7	204.822	57	3.4	47	42	153	7.5	245	1	1	3	0	0	0	0	1	1	0	0	1	1	12	73	18	12	3	1	0	1	1	1
57	1	32.6672	105	104	25	93	37.33	43	2.3	18.6957	5.6	62	6.4	25.1	149	3.1	1.7	27.4	132	34.2	2.5	8.2	40	120	3.3	324	0	1	3	1	0	0	0	1	0	0	0	1	0	10	85	43	13	6	0	0	0	1	0
49	2	21.7285	59	76	14	99	36.61	18	3.1	5.80645	5	65	8.8	16	138	4.7	1.9	24	151	43.6	2.2	6	21	64	0.8	274	0	1	2	1	1	0	0	0	1	0	0	1	0	8	31	31	15	3	0	0	0	0	0
53	1	22.3923	67	98	21	97	36.67	9	3.4	2.64706	7.8	92	14.1	14.6	116	8.4	1.7	12.8	204.822	34.8	1.2	1.4	53	41	0.7	186	0	0	0	0	1	0	0	0	0	0	1	1	0	0	21	16	15	5	0	0	0	0	0
43	2	31.746	146	80	21	92	36.94	16	2.8	5.71429	2	20	10.6	18.6	144	3.2	8.4	20.8	165	30.4	1.9	2.6	126	565	1.4	358	0	1	2	1	0	0	0	1	1	0	0	1	0	10	80	33	12	3	0	0	0	0	0
77	2	28.947	80	74	13	98	36.28	29	2.9	10	4.3	76	12.4	19.8	135	4.5	3.21904	13.4	204.822	35.1	1.2	3.5	29	40	1.3	170	1	1	2	1	1	0	0	1	0	1	0	1	0	8	48	30	13	6	0	0	1	1	1
76	2	31.2573	78	88	16	100	36.83	13	3.2	4.0625	19.1	218	11.9	23.1	137	2.7	1.3	17	204.822	34.3	1.6	31.9	61	121	1.1	291	0	1	3	1	1	0	1	0	1	0	0	1	0	6	49	39	15	9	0	0	1	1	1
43	1	41.5838	80	70	9	96	36.44	104	3.4	30.5882	25.3	171	6.8	24.4	140	4.3	3.4	28.3	190	43.4	2.6	49	238	397	5.2	656	0	1	3	1	0	0	0	1	0	0	0	1	0	10	80	27	13	3	0	0	1	1	1
66	2	22.782	90	86	19	97	35.17	22	2.9	7.58621	11.9	125	10	17.3	151	3.7	1	14	204.822	27.2	1.2	0.8	56	45	0.9	282	0	0	0	1	0	0	0	0	0	0	0	0	0	2	36	31	15	5	0	0	1	0	0
54	2	25.7338	106	59	28	91	38.28	18	2.7	6.66667	7.1	162	12.9	15.8	146	4	4.6	12.3	204.822	27.3	1.1	0.4	90	129	1.4	338	0	1	3	1	1	0	0	1	1	1	0	1	0	10	58	38	15	2	0	0	0	0	0
57	2	28.0689	97	83	30	100	36.44	11	2.4	4.58333	20.3	76	9.8	18.8	137	4.4	1.5	16.3	204.822	25.8	1.4	1.2	28	47	0.5	214	1	1	2	1	0	1	0	0	1	0	0	0	1	10	35	36	15	5	0	0	0	1	1
64	1	18.4816	108	78	31	92	36.67	10	3.2	3.125	8.1	241	14.5	13	134	4.7	1.2	12.1	204.822	31	1.1	0.3	92	51	0.6	222	0	1	2	1	1	0	0	1	0	1	1	0	0	9	55	51	12	5	0	0	0	0	0
57	2	34.1199	102	121	20	100	36.5	39	1.6	24.375	26.6	144	12.5	17.1	127	3.6	2.4	13.7	204.822	53.4	1.3	21.8	76	193	1.8	482.686	1	1	3	1	0	0	0	1	0	1	0	1	1	19	88	46	13	4	1	0	1	1	1
64	2	29.4785	92	58	19	98	35.56	31	2.7	11.4815	3.5	47	8.3	19	133	4.8	1.8	17.6	208	33.2	1.6	7.8	25	70	0.7	206	0	1	2	1	0	0	0	0	0	0	0	1	0	11	92	43	3	12	0	1	1	1	1
70	2	32.809	105	105	21	99	36.44	16	2.6	6.15385	15.7	118	10.8	16.6	127	3	7.5	14.9	204.822	29.6	1.4	0.7	18	29	1.6	165	1	1	2	1	0	1	1	0	1	0	0	1	0	7	39	31	15	7	0	0	0	1	1
79	2	20.3086	96	62	21	100	36.11	25	2.8	8.92857	13.7	86	13.8	14.9	126	3.7	2.2	19.5	204.822	55.4	1.8	3	43	113	1.5	292	0	1	3	1	1	1	0	0	0	0	0	0	0	10	77	49	14	7	0	0	1	1	1
58	2	26.1125	114	87	15	96	37.11	31	2.1	14.7619	9.7	36	10.2	14.8	137	4.6	9.4	35	204.822	54.2	3.2	3.4	97	297	2.5	416	0	1	3	1	0	1	0	1	0	0	0	0	0	10	83	32	10	4	0	0	1	0	0
47	2	30.5556	107	52	32	96	37.11	36	2.7	13.3333	17	37	6.2	21	127	5	10.1	52.3	66	109.8	4.8	22.7	209	451	2.7	615	1	1	3	1	0	0	0	1	0	0	0	1	0	15	119	46	15	3	0	0	1	1	1
50	2	34.6605	72	73	19	98	36.39	66	3.3	20	23.8	212	10.6	17.3	125	4.8	3.21904	16.5	204.822	46.7	1.5	31.8	28	154	8.1	203	1	1	3	1	0	0	0	1	0	0	0	1	0	9	74	27	15	4	0	0	0	1	1
66	1	17.68	104	88	22	95	38.17	20	2.4	8.33333	6.3	124	11.5	12	136	4.3	3.21904	11.7	204.822	23.3	1.1	0.6	14	18	0.7	174	0	0	0	0	1	1	0	0	0	0	0	1	0	6	52	35	10	6	0	0	1	0	0
55	2	31.6955	96	96	16	96	37.17	13	3.2	4.0625	14.8	216	14	13.1	139	3.8	2	12.1	215	29.1	1.1	1.3	360	451	0.6	244	0	0	0	1	0	0	0	1	0	0	0	0	0	5	16	25	15	7	0	0	1	0	0
63	2	50.9091	107	58	23	100	36.94	19	2.6	7.30769	33.4	262	12.3	15.4	140	6.9	4.1	17.5	212	29.1	1.6	2.4	44	38	0.9	275	1	1	3	1	1	1	0	1	1	0	0	1	0	10	67	34	15	7	0	0	0	1	1
64	2	32.809	86	80	18	98	35.17	15	3.7	4.05405	4.6	131	10	16.7	142	3.2	3.21904	10.9	207	34.8	0.9	8.5	79	59	0.8	333	0	0	0	1	1	1	0	0	0	0	0	0	1	7	42	24	11	13	1	1	1	1	0
49	2	24.9433	98	75	29	96	36.67	54	2.9	18.6207	10.1	78	8	20.6	144	4.1	2.4	21	151	52.8	1.9	30.5	123	139	1.3	390	1	1	1	1	0	0	0	0	1	0	0	1	0	11	55	28	13	5	0	0	1	1	1
71	2	26.6086	92	59	29	97	36.39	50	2.3	21.7391	19.2	39	7.3	19.4	150	3.8	2.5	39.1	204.822	90.5	3.7	2.4	15	35	1.8	147	0	1	3	1	0	0	0	0	1	0	0	1	1	11	80	43	12	8	0	0	1	1	1
58	2	32.1181	78	80	15	100	36.5	18	2.9	6.2069	4.8	35	12.5	15.3	141	2.9	2.4	18	204.822	39.9	1.6	3	22	55	0.8	254	0	0	0	0	0	0	1	1	0	1	0	1	0	8	49	25	15	5	0	0	0	0	0
68	1	53.1257	111	80	19	93	37.61	14	3.2	4.375	9.4	234	9.4	18.1	142	3.2	0.9	14.2	204.822	25.1	1.2	0.8	24	31	0.4	353	0	1	3	1	1	1	1	0	0	0	0	1	0	7	75	31	9	8	0	0	0	0	0
48	2	28.2561	120	175	27	100	36.72	22	2.4	9.16667	15.6	147	11.4	15.6	136	5.2	6.8	18.9	239	31.4	1.7	4.8	20	36	1.5	377	0	0	0	1	1	0	0	1	0	0	0	1	0	11	55	32	14	4	0	0	0	0	0
71	2	38.655	56	78	11	100	36.83	17	3	5.66667	3.4	101	8.6	17	144	3.7	3.21904	32.1	356	37.5	2.9	1.1	24	54	1	417	0	1	2	0	1	1	0	0	0	1	0	0	0	4	27	28	15	8	0	0	0	0	0
66	1	21.2179	115	82	19	100	36.33	35	2	17.5	9.7	100	7.4	14	136	3.4	2.1	23.3	242	30.2	2.1	2.5	7	25	3.4	222	0	1	3	1	1	0	0	0	1	0	0	1	0	8	72	39	15	8	0	0	1	1	1
76	2	30.1932	107	87	18	98	36.72	12	2.9	4.13793	10.4	132	10.9	18.5	134	3.7	1.3	17	193	37.1	1.5	1.9	11	38	0.5	142	0	1	2	0	0	0	0	0	0	0	0	1	0	4	35	34	14	6	0	0	0	0	0
63	2	33.6593	90	69	13	97	36.67	47	2	23.5	17.5	124	6.9	17.1	128	3.9	3.3	34	204.822	43.5	3.1	2.5	11	27	2.5	155	0	0	0	1	0	1	1	0	0	0	0	1	0	6	59	26	15	9	0	0	1	1	1
53	1	28.9811	97	68	14	100	36.5	19	3	6.33333	8.3	130	9.1	14.7	145	3.9	6.2	26.9	101	54.9	2.5	1.8	3467	8095	0.8	482.686	0	1	3	1	0	0	0	0	0	0	0	0	0	7	55	32	15	4	0	0	0	0	0
75	2	28.8044	112	64	20	100	36.94	33	2.7	12.2222	13.1	52	7.8	15.7	140	5.6	8.1	30.2	68	87.4	2.8	18	53	89	1.3	482.686	1	1	3	0	0	1	0	0	0	0	0	1	0	13	91	47	15	9	1	1	1	1	0
69	1	25.8645	80	82	14	100	36.78	14	2	7	10.6	199	11.5	14.5	134	4.4	1.6	14.5	548	29.5	1.3	0.7	21	45	0.7	314	0	1	2	1	1	1	0	0	0	0	0	1	0	3	50	40	13	6	0	0	1	0	0
53	1	46.6483	60	56	20	98	36.78	82	3	27.3333	14	55	5.8	14	127	5.9	2.1	29.3	92	42.1	2.7	12.4	13	78	3.2	219	1	1	3	1	0	0	0	0	0	0	0	1	0	12	85	33	15	4	1	1	1	1	1
55	2	23.56	125	84	25	100	37	60	4	15	4.7	115	7.7	14.1	141	6.1	1.7	22.1	204.822	31.9	2.1	6.9	33	106	4	482.686	0	1	3	1	0	0	0	1	0	0	0	1	1	9	68	35	10	7	0	0	1	1	1
71	2	36.8481	90	69	23	98	36.61	15	3.6	4.16667	24.6	234	13.4	14.2	139	4.2	2.3	12.2	204.822	31.6	1.1	0.8	36	53	0.6	482.686	0	1	2	0	1	1	0	0	0	1	0	0	0	1	42	29	15	9	0	0	0	1	0
68	1	30.2657	102	74	24	94	36.67	105	2.6	40.3846	11.6	101	9.5	15.4	121	5.7	2.7	24.1	123	43	2.2	11.8	45	56	2.1	231	0	1	3	1	0	1	0	1	0	0	0	1	0	12	95	39	15	8	1	0	1	1	1
66	2	46.9104	96	62	16	100	35.89	55	2.4	22.9167	12.1	145	9.6	13.3	132	5.4	3.21904	19.8	204.822	33.2	1.8	2.1	34	51	4.1	221	0	1	3	1	0	0	0	0	0	0	0	0	0	9	63	27	15	6	0	0	1	1	1
52	1	37.2333	100	65	21	98	36.44	49	4.3	11.3953	12.2	68	8.1	22.7	145	4	2.2	39	117	80.9	3.6	6.7	8	24	1.6	267	1	1	3	1	1	0	0	0	1	0	0	1	0	12	94	36	11	5	1	0	1	1	1
54	2	23.0668	72	99	16	97	36.11	23	3	7.66667	7.7	197	14.2	15.2	140	4.4	3.21904	19.6	204.822	59.5	1.8	1.1	43	39	1.7	333	0	1	2	0	1	0	1	0	0	0	0	0	0	2	29	27	15	6	0	0	0	0	0
62	2	28.6363	58	74	25	98	36.44	112	3.1	36.129	16.8	137	8.8	22.7	125	5.5	3.21904	14.3	204.822	30.4	1.3	4.3	34	45	2.1	352	0	1	2	1	0	1	0	0	0	0	0	1	0	8	64	38	13	9	0	0	1	1	1
62	2	33.8021	67	45	10	100	36.5	108	2.4	45	22.6	102	6.4	21.3	125	5.5	1.6	23.6	204.822	36.7	2.2	3.4	25	60	2.1	273	0	1	2	1	0	0	1	1	0	0	0	1	0	7	74	36	15	7	0	0	0	0	0
54	2	25.3815	108	89	25	96	37	81	2.2	36.8182	19.4	24	8.6	14.7	137	4.1	5	13.8	213	38.9	1.3	0.9	18	49	3.1	311	1	1	3	1	0	0	0	0	0	0	0	0	0	14	100	54	15	8	1	1	1	1	1
70	1	29.4754	98	59	17	100	36.83	79	5.7	13.8596	14.4	166	11.9	15.3	129	3.5	3.21904	13	204.822	34.4	1.2	1.8	22	25	5	106	1	1	3	0	0	1	0	0	0	1	0	1	1	10	90	34	8	11	0	0	1	1	1
65	2	28.3447	75	53	18	100	36.67	22	2.8	7.85714	17.5	143	11.8	14.2	136	4.8	7.2	24.1	204.822	62.3	2.3	4.3	1220	1260	1.7	355	0	1	3	1	0	0	0	0	1	0	0	0	0	7	46	12	12	9	0	0	1	1	1
74	2	27.2817	119	79	21	95	36.78	44	2	22	9.7	224	12.9	17.4	142	4.3	2.6	18.4	142	35.6	1.7	2.7	29	75	1.8	363	1	1	1	1	0	0	1	0	0	0	1	1	0	7	61	26	15	9	0	0	1	1	1
75	1	31.0971	79	89	16	100	36.5	5	2.9	1.72414	7	72	7.4	18.3	138	4.4	0.8	19.2	206	59.4	1.8	0.6	53	49	1.8	267	0	1	3	0	0	1	1	0	0	0	0	1	0	13	62	44	11	11	0	1	0	1	0
64	2	27.2286	85	92	13	97	36.89	30	2.4	12.5	8.4	76	9.2	16.6	134	3.9	1.7	16.2	139	44.2	1.5	2.7	44	78	0.5	279	1	1	2	0	1	1	0	0	1	0	0	1	0	5	45	29	14	9	1	0	1	1	1
50	2	30.4705	124	51	25	100	36.78	32	3.1	10.3226	2.9	58	8.7	14.8	143	3.6	12	21	204.822	35.2	1.9	3.1	1738	11412	2.5	7620	1	1	3	1	0	0	0	0	0	0	0	1	0	13	77	41	15	3	1	1	1	1	1
74	1	26.3465	82	65	22	99	36.5	41	2.4	17.0833	15.7	54	7.9	18.8	143	5.9	5.5	21.2	79	79.4	2	5.6	17	23	1.9	184	1	1	3	1	0	0	0	0	0	1	0	0	1	11	72	43	15	7	1	1	1	1	1
80	2	22.0688	75	118	18	96	36.89	12	2.9	4.13793	5	77	11.4	13.7	118	3.6	1.9	13.6	115	43	1.2	2.4	47	339	0.8	896	0	1	2	0	0	1	0	1	0	0	1	1	0	4	29	28	15	12	0	0	1	1	1
71	1	38.125	89	122	19	98	36.5	45	2.3	19.5652	8.6	188	10.1	18	148	4.6	2.2	16	104	46.2	1.5	1.2	39	90	1.1	391	0	1	2	1	0	1	1	0	1	0	0	0	0	4	57	33	13	11	0	0	1	1	1
57	1	54.6069	72	99	24	95	37.56	30	2.1	14.2857	5	42	12.7	15.5	150	4.4	2.1	24.2	164	28.5	2.2	1.1	20	37	0.6	428	0	1	2	1	1	1	0	1	1	0	1	0	0	7	43	30	15	6	0	0	1	0	0
76	2	34.1797	61	73	22	100	36.44	32	2.3	13.913	16.4	116	11.2	19.3	137	6.4	2.6	18.1	138	32.5	1.7	2.5	25	42	1.1	236	0	1	3	1	0	1	1	0	0	1	0	1	0	11	71	25	15	11	1	1	1	1	1
48	2	20.8716	82	86	21	100	37	52	3.4	15.2941	5.2	24	11.2	19.1	146	4.5	1.5	18.9	103	31.2	1.7	4.4	38	50	1.7	140	1	1	2	1	0	0	0	0	1	0	0	1	0	8	60	41	15	7	0	1	1	1	1
57	2	25.3161	106	51	12	100	37	28	3.3	8.48485	2.8	78	10.1	15.6	146	4.5	5.9	16.6	195	45.2	1.5	4.2	186	831	1.7	269	0	1	3	1	0	1	0	0	0	0	0	1	1	11	62	45	15	7	0	1	0	1	0
57	2	19.9751	94	86	15	97	36.67	33	3	11	28.9	111	9.4	12	146	3.8	1.9	20.1	451	38.2	1.8	2.9	41	78	0.8	535	0	1	1	1	1	1	0	0	0	0	0	1	0	7	61	42	11	8	0	0	1	1	1
31	2	30.354	103	87	24	94	36.94	9	3.2	2.8125	8.1	265	10.2	15.9	136	4	2.8	25.4	179	46.6	2.4	18	79	136	0.6	170	0	1	2	0	0	0	0	1	0	0	0	0	0	4	45	23	15	1	1	0	0	0	0
51	2	27.4728	116	82	20	100	37.22	21	2.4	8.75	7.3	102	9.8	17.8	137	3.9	6.2	19.4	211	34.7	1.8	7.4	952	2808	0.7	253	0	1	3	1	1	0	0	0	0	0	0	1	0	11	64	36	15	4	0	1	0	0	0
55	2	28.2915	135	88	18	96	37.11	27	2.3	11.7391	10.1	92	8.4	18.9	136	4.4	3.21904	19.4	204.822	33.6	1.8	6.6	39	159	1.2	340	1	0	0	1	0	0	0	1	0	0	0	0	0	9	57	36	15	4	1	0	1	1	1
51	2	37.5574	89	71	20	100	37.33	21	2.6	8.07692	3.6	77	9.4	15.4	138	4.5	4.4	15.5	156	43.4	1.4	3.4	857	1887	0.9	482.686	0	1	3	0	1	0	0	0	0	0	0	1	0	12	64	46	15	6	1	1	1	0	0
55	1	20.9042	84	58	12	92	37.28	16	2.6	6.15385	11.5	144	10.6	17.2	133	5.2	3.1	14.7	204.822	30.9	1.4	1.1	12	24	0.9	266	0	1	2	0	0	1	1	1	0	1	1	0	0	6	58	29	14	10	0	0	0	1	0
67	2	30.1414	119	103	17	96	38.06	5	2.9	1.72414	12.4	316	11.4	14.2	131	7.5	1.4	17.4	204.822	37.7	1.6	18	53	89	0.5	482.686	0	1	2	1	0	0	0	0	1	0	0	0	0	4	67	47	4	4	0	0	1	0	0
78	2	23.6324	89	74	15	95	36.61	45	3.1	14.5161	10.5	101	8.3	14.2	135	4.7	2.1	17.2	204.822	36.8	1.6	0.7	22	67	2.3	664	0	1	2	1	0	0	1	0	1	1	0	0	0	14	70	44	11	9	0	0	1	1	1
54	2	42.449	84	58	17	96	36.94	58	2.7	21.4815	7.4	142	9.4	17.7	132	5.8	1.1	13.1	204.822	38.8	1.2	0.8	25	51	9.8	240	1	1	3	1	0	0	0	0	0	0	0	1	0	8	64	38	15	6	0	0	1	1	1
71	2	22.534	73	62	17	96	37.39	44	2.6	16.9231	0.3	10	6.6	14.8	128	5.3	4.8	76.3	319	46.1	6.9	3.7	56	82	3.6	191	0	1	3	1	0	1	0	0	0	0	0	1	0	11	71	36	14	10	0	0	1	1	0
67	1	27.9904	67	83	12	100	36.56	30	3.3	9.09091	2.3	100	9	17.1	142	3.6	3.7	17.2	175	53.3	1.5	2.9	222	302	1.6	266	0	1	2	1	1	0	0	0	0	0	0	0	0	13	43	37	14	3	0	1	0	0	0
55	2	29.1945	88	90	25	99	36.89	28	3.3	8.48485	10.6	83	7.7	16.8	137	3.4	2.2	15.7	207	49.4	1.4	5.2	23	50	1.8	187	0	1	3	1	0	0	0	0	0	0	0	1	1	7	72	39	15	4	1	1	1	1	1
64	2	27.3959	74	82	16	100	37.33	33	3.2	10.3125	13.5	91	10.1	15.2	136	4.2	2.2	22.9	207	35.1	2.1	2.6	365	938	1.2	256	0	1	2	1	0	1	0	0	0	1	0	1	0	8	42	32	15	11	0	0	1	0	0
74	2	19.487	79	46	21	100	36.78	34	3.3	10.303	10.7	190	7.6	23	136	3.5	1.4	21.8	204.822	36.8	2	1.4	11	49	1.8	482.686	0	0	0	0	0	0	1	0	0	0	0	1	0	5	47	31	15	10	0	0	1	0	0
60	1	58.5908	85	74	19	91	36.83	72	2	36	35.1	201	9.8	17.7	128	5.3	2.5	27.1	523	46.9	2.5	9.5	16	47	4.5	382	0	1	3	1	0	0	0	1	0	1	0	0	0	11	89	34	13	5	1	0	1	1	1
71	1	25.5102	87	77	20	100	36.56	42	2.8	15	11	42	9.2	16.1	135	2.8	2.4	15.9	204.822	37.3	1.5	1.8	54	73	1.4	310	1	1	2	1	0	1	0	1	0	0	0	1	0	7	32	22	15	8	0	0	1	1	1
53	2	28.0057	102	81	17	100	36.61	23	2.4	9.58333	17.7	65	9.4	17.9	130	4.8	1.1	21.9	280	34.2	2	10.3	752	880	0.7	349	0	1	2	0	1	0	0	1	0	0	0	1	0	12	54	23	15	5	0	0	1	0	0
66	2	25.42	76	85	14	100	35.67	16	3.8	4.21053	6.8	51	7.7	19.7	145	4.2	3.3	34.7	292	42.5	3.2	1.4	20	38	0.9	165	0	1	2	1	0	1	0	1	1	0	0	0	0	8	33	37	15	4	0	0	1	0	0
70	1	38.4349	118	74	12	96	36.78	11	3.5	3.14286	21.5	348	12.4	14.6	133	5	3.5	19.6	234	31.6	1.8	1	25	57	1	196	0	1	3	1	0	0	0	0	0	0	0	1	0	1	57	28	15	6	1	1	1	1	1
65	2	38.179	121	54	26	95	37.28	55	2	27.5	22.1	189	13.6	14.2	147	4	1.4	17.8	204.822	29.6	1.6	1	34	89	2.1	488	0	1	1	1	0	1	0	0	0	0	0	1	0	9	76	37	15	4	0	0	1	0	0
73	1	46.875	103	82	18	98	36.61	74	2.9	25.5172	18.5	108	14.3	17.4	130	5	3.5	25.5	204.822	85.3	2.4	1.2	1126	763	3.3	515	0	1	3	0	0	0	0	0	0	0	0	1	0	8	70	34	14	12	0	0	1	1	1
58	2	23.845	108	72	18	96	36.94	24	3.3	7.27273	9.5	76	10	18.8	138	4.9	2.2	21.5	306	37.7	2	15	398	464	1	381	1	1	3	1	0	0	0	0	0	1	0	1	0	10	55	21	15	4	0	0	0	1	1
72	2	35.2627	80	89	11	99	35.5	14	3.1	4.51613	16.9	76	12.9	12.7	141	4.5	1.8	17.3	204.822	27.9	1.6	1.5	53	72	1	321	0	1	2	0	0	0	1	0	0	0	0	0	0	10	31	31	14	7	0	0	0	0	0
48	2	29.0999	62	76	19	99	35.72	6	2.5	2.4	6.2	171	13.6	13.7	139	3.6	3.21904	15.1	204.822	28.3	1.3	9.9	218	141	0.6	198	0	1	2	1	0	0	0	1	1	0	0	1	1	7	63	42	4	4	0	0	1	0	0
53	2	29.9709	100	50	16	100	37.72	18	2.4	7.5	6.1	97	10.2	19.8	134	3.5	1.2	14.8	391	31.9	1.3	3.1	25	43	1.3	208	0	1	2	1	1	0	0	0	0	1	0	0	0	9	65	24	11	4	1	1	0	0	0
61	1	21.9875	110	70	17	96	37.22	19	2.3	8.26087	6.9	40	7.5	14	139	3.2	3.8	24.6	129	32.6	2.2	8.1	27	95	0.7	202	1	1	1	1	1	1	0	1	1	0	0	1	0	10	84	42	15	7	1	1	1	1	1
36	1	54.7179	101	72	21	99	36.67	18	2.9	6.2069	35.6	175	8.4	19	120	3.5	3.21904	16.7	298	36.4	1.6	30.1	24	153	1.2	118	1	1	3	1	0	0	0	1	0	0	0	0	0	9	50	17	15	4	0	0	0	1	1
41	1	27.7551	101	82	30	97	37.06	5	1.9	2.63158	9.9	173	9.7	16.8	146	4.3	2	17.1	204.822	44.1	1.5	3.9	34	46	0.5	240	0	1	3	1	1	0	0	1	0	0	0	0	0	7	85	49	5	2	0	0	1	1	1
57	2	26.0617	112	99	20	100	36.5	76	2.4	31.6667	14	55	5.8	14	132	3	3.21904	20	204.822	40	2	18	53	89	4.5	482.686	0	1	3	0	0	0	0	1	1	0	0	1	0	12	83	57	3	5	1	1	1	1	0
71	2	29.0533	104	55	19	96	37.06	71	3.8	18.6842	8.1	60	9	19.2	147	3.7	2	24.5	135	52.5	2.3	10.7	28	56	1.5	287	1	0	0	1	1	0	0	0	0	0	0	1	1	11	96	31	6	6	1	0	1	1	1
78	1	18.2469	101	93	26	98	36.78	13	2.6	5	0.9	17	8.5	16.9	141	3.8	1.7	18.3	204.822	34.5	1.7	1.2	9	15	0.5	147	1	0	0	1	0	0	0	0	1	0	0	0	0	6	45	34	15	7	0	0	1	1	1
40	1	23.4711	120	65	18	91	36.87	8	3.4	2.35294	3.5	49	5.3	25.5	131	3.1	0.9	19	147	36.9	1.7	8.8	25	119	0.4	264	0	1	2	1	0	0	0	0	1	0	0	1	0	8	54	26	14	3	0	1	0	0	0
75	1	42.1273	58	60	16	95	36.44	51	2.4	21.25	18.5	70	9.8	18.7	136	3.9	1.9	18.3	80	51.3	1.7	3.1	25	30	2.3	437	1	1	3	1	0	0	1	0	0	0	0	0	1	9	79	37	14	8	0	0	1	1	1
75	2	27.6006	95	58	27	97	36.61	56	2.7	20.7407	8.8	188	9.7	16.3	133	4.3	1.3	12.8	204.822	25.1	1.2	0.2	17	20	4.1	189	0	1	1	0	0	1	1	0	0	1	0	1	0	5	51	32	14	12	0	0	0	0	0
55	2	25.7228	80	58	25	98	37.11	38	3.4	11.1765	5.9	179	9.6	14.6	141	3.9	1.8	15.4	204.822	28.9	1.4	1.9	15	32	2.1	90	1	1	2	1	1	0	0	0	0	0	0	1	0	7	47	27	15	4	0	0	1	1	1
54	2	30.2382	90	50	28	100	36.94	37	2	18.5	7.4	25	9.7	14.9	137	3.8	6.3	19	166	36	1.7	3.3	43	116	1.1	996	0	1	3	1	0	0	0	0	0	0	0	0	0	7	48	38	15	6	1	1	1	1	1
58	2	23.9901	110	109	24	100	37.22	33	2	16.5	11	93	9.3	21.5	126	7.6	1.9	21.6	257	23.4	2	1.3	71	126	1.4	275	1	1	2	1	1	1	0	0	1	1	0	0	0	10	67	40	15	5	0	0	0	1	1
71	1	29.8955	70	89	20	97	36.67	73	3	24.3333	13.4	158	11.3	17.9	134	5.5	1.1	21.7	204.822	25.4	2	0.5	95	115	3.6	247	0	1	3	1	0	1	1	0	1	0	0	0	0	8	51	31	13	10	0	0	1	0	0
61	2	26.3605	92	78	42	99	37.28	17	2.6	6.53846	19.3	237	9.1	13.3	132	3.6	1.8	14.3	204.822	23.8	1.3	1.4	33	82	1.2	218	1	0	0	1	0	0	1	0	1	1	0	1	0	6	42	31	15	7	0	0	1	1	1
69	2	35.9184	55	104	19	100	37.61	31	2.9	10.6897	6.4	75	8	17.2	142	3.3	0.7	13.7	204.822	32.6	1.2	0.7	20	61	1.5	180	0	1	2	1	0	0	1	0	0	0	0	0	0	8	64	41	8	10	0	0	0	0	0
49	2	29.691	108	90	28	94	37.17	18	2.5	7.2	7.3	44	12.8	14	134	3.5	0.9	14	520	28.9	1.3	1.7	98	99	0.8	464	0	1	1	1	1	0	0	0	0	0	0	0	0	5	49	30	13	4	0	1	0	0	0
66	2	31.151	102	73	20	95	37.28	29	4.1	7.07317	8.4	81	7.3	17.7	139	4.7	1.8	15	204.822	32.1	1.4	1.9	57	98	1.5	482.686	1	1	3	1	1	0	0	0	0	0	1	1	0	6	64	35	13	6	0	0	1	1	1
63	2	33.0247	107	89	16	95	36.94	21	3.1	6.77419	4.6	69	10.5	15.3	139	4	2.1	21.2	146	35.2	1.9	6	17	34	1.5	203	0	1	2	1	0	1	1	0	1	0	0	1	0	9	64	33	13	7	1	0	1	1	1
78	1	29.2612	87	62	17	99	36.17	26	2.9	8.96552	3.9	51	8.4	17.7	145	3.9	2.1	20	204.822	40	2	1.2	17	22	1.4	176	0	1	3	1	0	1	0	0	1	1	0	0	1	8	56	44	7	11	0	0	1	1	0
69	2	21.9354	90	78	16	100	36.39	109	3.4	32.0588	12.8	253	10.4	17.2	123	4.7	2.8	35.4	204.822	30.5	3.2	3.9	29	51	3.2	312	0	1	3	0	0	1	1	0	0	0	0	0	0	4	64	33	15	9	0	0	1	1	1
66	2	30.138	108	85	23	95	38.17	36	2.9	12.4138	9.3	196	7.7	19.2	143	3.8	2.9	17.8	204.822	129	1.6	13.6	102	314	1.1	354	1	1	3	1	1	1	0	1	0	0	0	1	0	8	75	31	13	10	0	0	1	1	1
54	1	32.7558	77	46	20	100	36.5	12	3.3	3.63636	11.3	163	11.6	17.2	139	4.6	1.4	15.9	204.822	32.8	1.5	3.4	30	49	1.3	201	1	1	3	1	1	0	0	1	0	0	0	1	0	6	32	39	15	5	0	1	0	1	1
68	2	27.1115	101	82	23	100	36.78	49	2.4	20.4167	10.3	189	6.4	14.6	135	4.8	3.21904	17.1	204.822	35.3	1.6	1.5	53	22	1.1	482.686	0	1	1	0	0	1	0	1	0	0	0	1	0	3	42	23	14	9	0	0	0	0	0
57	1	26.0554	94	70	16	100	36.61	28	2.3	12.1739	6.3	27	10	24	133	4	3.21904	21.2	118	45.5	1.9	11.7	48	94	0.9	399	0	1	3	1	0	0	0	0	0	0	0	0	1	8	51	31	14	5	0	1	1	1	0
49	2	24.8016	76	81	21	100	1.22	11	2.8	3.92857	5.2	58	6.4	14.7	139	2.1	16.8	17.9	127	47.2	1.7	2.4	221	800	1.3	1926	1	1	2	1	0	0	0	0	0	0	0	0	0	14	112	46	3	3	1	1	1	1	1
60	2	42.517	81	78	36	92	36.83	57	2.5	22.8	5.4	74	10.3	20	127	5.2	2.6	30	149	38.9	2.7	10.2	17	40	2.4	195	1	1	3	1	1	0	0	0	0	0	0	1	0	8	69	33	15	5	0	0	0	1	1
60	2	29.8148	108	99	18	95	36.83	52	2.9	17.931	12.1	121	8.8	18.4	140	5.3	2.1	15.3	204.822	30.8	1.4	1.1	12	15	1.4	125	1	1	2	1	1	1	0	0	1	1	0	1	0	7	55	35	15	7	0	0	1	1	1
55	2	32.1959	84	82	19	96	36.39	26	2.4	10.8333	11.4	78	11.3	18.5	137	5	2.8	18.4	163	37.8	1.7	6.5	448	666	1.8	482.686	0	1	3	1	0	0	0	0	0	0	0	1	0	13	63	50	13	6	0	1	0	0	0
65	1	31.809	89	73	14	99	36.56	99	2.2	45	18.3	52	7.9	18.8	140	3.6	1.4	45.5	105	150	4.1	46.4	180	460	7.5	589	0	1	3	1	1	1	0	1	0	0	0	0	0	16	136	38	6	4	0	0	1	1	1
57	2	51.729	98	95	0	99	36.5	33	3.6	9.16667	3.8	109	11.5	21.2	136	3.8	2.5	24.7	215	38.1	2.3	5.1	11	31	2.1	307	0	1	2	0	0	0	1	0	0	0	0	1	0	8	48	24	15	8	0	0	1	0	0
63	2	38.5633	89	92	19	99	36.94	19	3.1	6.12903	13.4	144	11.6	15.8	139	4.3	1.6	12.8	235	33.1	1.2	2	458	841	0.9	482.686	0	1	2	1	1	1	0	0	0	0	0	1	0	8	29	29	15	9	0	1	0	0	0
52	2	27.5927	72	80	18	100	36.78	13	3	4.33333	8.3	113	12	13	141	4.9	4.4	18.9	182	32.9	1.7	4.3	375	422	0.9	482.686	0	1	2	0	0	0	0	0	0	0	0	1	0	9	44	28	15	4	1	1	1	0	0
51	2	36.9544	91	107	14	90	36.56	10	2.5	4	5.9	77	11.5	14.2	137	4.8	3.21904	17.8	204.822	35.1	1.7	2.8	40	85	0.5	482.686	0	0	0	0	0	0	0	0	0	0	0	0	0	7	46	35	7	4	0	0	1	0	0
63	2	20.7451	96	94	20	100	36.44	7	2.5	2.8	11.8	138	10.8	12.7	106	5.2	3.21904	13.1	204.822	41.1	1.2	0.9	29	59	0.6	152	0	1	3	1	1	0	0	0	0	0	1	1	0	6	42	34	14	5	0	0	1	0	0
46	1	22.6403	79	83	15	97	36.72	7	4.1	1.70732	5	172	12.2	12.7	142	3.8	3.21904	13.1	204.822	32.2	1.2	0.4	8	19	0.5	125	0	1	2	0	0	0	0	0	0	0	0	1	0	2	33	23	13	1	0	0	1	0	0
66	2	38.6916	85	87	18	93	36.94	21	3	7	6	55	10.4	14.3	134	5.3	1.9	18.2	114	34.5	1.7	0.9	80	89	1.1	344	1	1	3	1	0	1	0	1	1	1	1	1	0	10	49	35	15	6	1	1	1	1	1
58	2	19.4736	86	69	13	100	37.11	17	2.4	7.08333	5	95	11.9	14.4	141	4.3	1	15.3	253	35.2	1.3	2.1	93	204	0.7	401	0	0	0	1	1	0	0	0	0	0	1	0	0	9	60	39	10	7	0	0	0	1	0
73	1	22.6667	96	78	24	91	36.5	15	3.4	4.41176	20.8	182	5.7	19.4	146	3.6	2.4	35	136	57	3.2	2.6	14	62	0.5	354	1	1	1	1	0	0	0	0	1	0	1	1	0	6	41	23	15	8	1	0	1	1	1
64	2	31.8801	89	92	20	95	36.56	30	3.1	9.67742	8.5	93	10.9	15.2	133	5.4	2.8	15.1	204.822	41.8	1.4	3.8	53	142	1.3	266	0	1	2	1	1	0	0	0	1	0	0	1	0	10	32	29	15	7	1	1	1	0	0
55	1	31.6158	110	65	24	92	37.44	66	3.2	20.625	14.6	66	9.9	17.9	138	3.8	1.8	25	204.822	42	2.4	39	153	233	2.8	337	0	1	2	1	0	0	0	1	1	0	0	0	0	9	69	23	15	4	0	0	1	1	1
62	2	33.0762	80	88	29	97	36.44	14	3	4.66667	26.5	189	10.9	14	138	3.6	6.8	12.6	544	31.5	1.2	0.9	561	444	2.4	310	0	1	2	1	1	1	0	0	1	1	0	0	0	12	75	32	10	5	0	0	0	0	0
68	2	25.8332	68	90	16	98	36.61	27	3	9	3.4	41	8.5	17.5	143	4.2	1.9	28.7	181	31.4	2.6	1.8	25	48	1.1	350	1	1	2	1	0	1	0	0	0	0	0	1	0	12	46	37	9	7	0	0	1	1	1
80	1	19.5933	69	66	25	99	36.28	15	3.6	4.16667	0.5	49	7.5	17	145	3.6	1.6	16.7	204.822	30.3	1.5	0.5	39	53	0.7	152	0	1	1	1	0	1	0	1	0	1	0	0	0	11	91	39	3	7	0	0	0	0	0
71	2	46.3081	52	78	18	98	36.56	84	3.2	26.25	8.6	68	7.4	21.3	130	5	4	15.2	204.822	27.5	1.4	9.9	40	64	2.5	375	0	1	3	1	0	1	0	1	1	0	0	1	0	12	92	34	12	7	0	0	0	0	0
55	1	27.8132	85	70	26	99	36.39	82	3.1	26.4516	17.6	346	7	17.2	138	3.8	1.1	15.7	204.822	28.8	1.4	10	26	76	2.4	162	0	1	2	0	0	0	0	0	1	0	0	1	0	7	70	29	14	2	0	0	1	1	1
64	2	26.3251	74	71	15	100	36.39	13	2.1	6.19048	10.1	114	11	16.3	128	2.2	2.4	15.7	204.822	37.7	1.4	3.2	14	27	1.1	301	0	1	3	1	0	0	1	0	1	0	0	1	0	6	40	34	15	6	0	0	0	0	0
55	2	42.269	78	64	18	92	36.89	93	3.9	23.8462	16.8	121	7.3	21.2	126	5.7	2.9	25.3	204.822	72.5	2.3	14.5	41	74	4.4	482.686	0	1	3	1	1	1	0	0	1	0	0	1	0	13	109	41	15	5	0	0	1	1	1
63	2	31.1083	85	79	15	99	36.83	34	3.4	10	5.7	82	10.3	15.1	144	4	3.21904	13.8	160	21.8	1.3	3.7	38	31	0.7	145	1	1	2	1	0	0	0	0	0	0	0	0	0	5	48	33	15	6	0	0	0	1	1
54	2	29.9036	88	88	16	99	37.28	12	2.8	4.28571	3.2	36	6.9	19	137	3.4	4.3	21.8	90	39	2	5.1	59	193	0.6	499	1	1	3	0	0	0	0	1	1	0	0	1	0	6	41	26	15	4	0	0	1	1	1
54	1	26.7299	120	70	22	97	38	22	2	11	6.5	66	7.6	19.6	145	3.8	3.2	23.7	575	64.9	2.3	2.5	16	44	0.6	350	0	1	2	1	0	0	0	0	1	0	0	0	0	12	91	45	15	2	0	0	1	1	1
61	2	30.9936	97	60	29	97	36.56	96	2.4	40	46.1	17	6.7	17.2	134	4.8	1	14.8	183	41.4	1.4	1.8	12	38	3.3	1273	1	1	3	0	0	0	0	0	0	0	0	0	0	11	67	34	12	3	0	1	1	1	1
61	2	25.2622	127	95	25	100	36.17	12	2.5	4.8	11.1	76	9.3	15.7	139	4.2	3	21.5	79	47.4	2	4	27	43	1	288	0	1	1	0	0	0	0	0	0	0	0	1	0	4	40	40	15	3	1	1	1	0	0
69	1	25.6874	126	77	26	94	37	39	2.4	16.25	20.9	225	9	15.9	122	4.8	1.3	18.6	204.822	47	1.7	18	53	89	1.7	482.686	0	1	2	0	0	0	0	0	0	0	0	1	0	3	57	30	14	5	0	0	1	1	1
57	2	33.2029	121	114	33	100	36.83	15	3.1	4.83871	8.5	83	7.4	17.7	139	3.2	1.8	15.8	164	29.2	1.5	2.1	61	160	1.1	398	0	1	3	1	0	0	0	0	0	0	0	0	0	6	52	34	15	3	1	1	1	1	1
58	2	38.4903	48	58	12	97	36.44	49	3.2	15.3125	4.2	71	8	18.7	133	5.2	2	21.4	86	40.9	2	9.9	23	43	8.7	190	0	1	3	0	1	0	0	0	0	0	0	1	0	13	97	45	13	4	0	0	1	1	1
64	2	28.7698	104	96	19	96	37.17	14	3.3	4.24242	4.5	122	8.9	13.5	138	3.3	3.21904	14.7	204.822	36.8	1.3	1.5	11	32	1	260	0	1	2	1	1	0	0	0	1	1	0	1	0	8	53	30	5	8	0	0	0	1	0
62	2	31.5301	100	109	30	90	36.5	41	2.4	17.0833	18.5	236	11.9	18.3	134	4.6	1.7	12.7	204.822	46.9	1.2	2.3	115	253	1.7	332	1	1	3	1	1	0	0	1	1	0	1	1	0	5	58	20	15	7	1	0	1	1	1
52	2	33.9592	110	102	30	92	37.56	36	3.4	10.5882	21.8	340	10.7	13.5	141	4.5	3	15.7	204.822	33.8	1.5	9.7	51	148	1.2	340	0	0	0	1	0	0	1	1	1	0	0	1	0	4	49	20	15	3	0	0	1	0	0
56	1	26.8566	108	78	15	99	36.44	46	2.7	17.037	9.3	130	6.8	21.3	132	4.8	1.7	24.2	239	62.7	2.2	5.5	22	39	1.9	136	0	1	3	1	1	0	0	0	1	1	0	1	1	5	65	28	15	4	1	0	1	0	0
72	2	36.6115	99	84	24	91	35.89	37	2.6	14.2308	8.3	47	13.4	14.6	131	5.5	6.4	22.2	335	36.2	2.1	4.4	16	28	1.8	166	0	1	3	1	0	1	1	0	0	0	0	1	1	7	72	33	15	10	1	1	1	1	1
65	2	27.0934	81	96	14	99	36.56	11	3	3.66667	3.3	97	8.5	14.4	142	2.9	3.3	15.2	155	38.3	1.3	3.5	202	410	0.8	245	1	1	2	1	0	0	0	0	0	0	0	0	0	9	27	29	15	7	1	1	1	1	1
66	2	30.9666	89	64	14	100	36.72	31	2.4	12.9167	6.6	88	8	17.3	136	3.9	2.2	19.1	155	44.8	1.8	2.3	397	692	0.9	482.686	0	1	3	1	0	0	0	0	0	0	0	0	0	7	55	26	14	5	1	1	0	0	0
58	1	25.7232	103	82	25	95	36.56	47	3.7	12.7027	26.1	141	7.9	20	131	3.3	1.3	24.7	204.822	42.4	2.3	24.5	47	128	0.8	263	0	1	2	1	1	0	0	1	1	0	1	1	0	15	86	40	5	5	0	0	1	1	1
29	2	17.6327	143	63	24	93	39.17	18	2.3	7.82609	4.3	47	7.4	19.3	140	3.8	1.5	18.1	281	40.9	1.7	3.5	43	34	0.7	118	0	0	0	0	0	0	0	0	1	0	0	0	0	10	66	39	15	1	0	0	1	0	0
66	2	29.4076	106	61	20	97	37.11	22	4.7	4.68085	13.1	66	7.1	14.3	134	5.7	2.7	31.7	204.822	47.8	2.9	4.6	17	28	1.5	157	0	1	2	1	0	0	0	0	0	0	0	1	0	10	78	34	10	5	0	0	0	0	0
57	1	46.2291	98	84	18	98	36.28	50	3.2	15.625	10	28	7.3	18	139	3.8	1.5	18.8	104	36.9	1.7	1.9	31	56	3	270	0	1	3	1	0	0	1	0	0	0	0	1	0	12	57	42	15	7	0	1	0	1	0
63	2	25.3287	111	61	19	97	36.78	13	3.8	3.42105	7.5	136	11.9	15.3	135	4	3.2	24.5	157	60.9	2.3	3.4	11	20	0.8	99	1	1	3	1	0	0	0	0	0	0	0	1	0	9	39	37	15	7	0	0	1	1	1
74	2	26.8566	107	56	37	94	36.83	21	2.2	9.54545	9.6	140	12	18	132	4.6	1.7	16.1	204.822	26.5	1.5	3.7	54	106	0.8	411	0	1	2	1	1	1	0	1	0	1	0	1	0	4	59	38	15	9	0	0	1	1	1
62	2	36.5744	94	79	25	97	36.72	41	3.3	12.4242	16.7	127	7.7	16.7	135	3.8	1.4	20.2	137	42.5	1.9	16.5	60	101	1.4	247	0	1	3	1	0	0	0	0	0	0	0	1	1	9	71	40	14	5	1	0	1	1	1
65	2	30.1958	58	75	18	97	35	54	2.4	22.5	13.7	363	7	23.5	141	4.4	0.8	15.9	374	95.8	1.5	23	116	551	9.2	482.686	0	1	3	1	0	1	1	0	0	1	0	1	0	15	86	44	9	12	0	0	1	1	1
74	2	35.5726	66	126	24	95	37	70	5.7	12.2807	14.2	102	9.2	16.6	141	4.5	1.5	14.3	204.822	35.2	1.3	0.5	15	26	5.6	172	1	1	3	1	1	1	0	0	0	1	0	1	1	7	70	30	15	8	0	0	1	1	1
66	2	26.7188	81	86	33	100	36.94	14	2	7	13.6	105	10.2	15.5	142	4.9	5.1	15.3	171	37.6	1.4	2.2	1012	2740	1.3	341	0	1	1	0	1	1	0	0	0	0	0	1	0	6	58	29	15	8	1	1	1	0	0
63	2	20.4321	63	76	9	100	36.56	32	3.1	10.3226	4	154	11.5	16.7	137	3.8	0.8	12.8	204.822	30.2	1.1	0.4	3	35	7.4	264	0	1	3	1	0	1	0	0	1	1	0	0	0	10	105	41	3	7	0	0	1	1	1
41	1	19.0618	71	65	15	97	26.67	11	3.2	3.4375	4.9	189	11.2	16.7	130	3	1.5	16.4	204.822	108.3	1.5	2.3	326	430	0.6	252	0	1	2	1	0	0	0	0	0	0	0	0	0	4	71	25	14	3	0	0	0	1	0
60	2	37.7338	87	64	20	98	36.44	25	2.2	11.3636	4	19	10.1	17.9	134	4	4.4	59.3	145	55	5.3	4.8	39	87	0.8	347	0	1	2	1	0	1	0	1	1	0	0	1	0	8	59	27	14	3	0	0	1	1	0
73	2	23.03	95	112	29	91	36.78	56	2.8	20	7.3	14	8.4	13.5	134	4.4	3.21904	13.2	524	64.3	1.2	0.3	31	29	1.8	461	1	1	2	0	0	0	1	0	1	1	0	0	0	6	36	19	15	11	0	1	1	1	1
53	2	30.2173	78	112	16	100	36.06	24	3	8	2.3	68	8.1	15.6	140	4.1	2.1	18.7	221	50.1	1.7	2.9	487	443	1.1	364	0	1	3	1	1	0	0	0	0	0	0	0	0	8	42	34	15	6	1	1	0	0	0
44	1	40.0218	120	76	18	99	37.56	74	3.1	23.871	21.1	85	10.1	15.3	135	5.3	1.2	16.1	207	26.5	1.5	13.5	64	114	2.8	547	0	1	3	1	0	0	0	1	1	0	0	1	0	11	82	38	15	3	0	0	1	1	1
39	2	29.5848	122	79	12	96	37.83	8	1.8	4.44444	11.1	185	4.6	19.9	128	4.3	1.2	72.3	172	150	6.6	6.6	21	29	0.4	209	0	0	0	1	0	0	0	0	0	0	0	1	0	4	48	21	14	3	1	0	0	0	0
60	2	22.0026	79	71	37	100	36.94	31	3.3	9.39394	3	40	8.4	15.1	132	5.9	2.9	150	419	150	13.8	0.5	23	35	5.3	206	0	1	3	0	0	1	0	1	1	1	0	0	0	11	74	40	7	10	0	0	1	0	0
62	2	23.9158	81	82	21	99	36.67	176	2.4	73.3333	39	312	9.8	13.4	130	5.7	1.9	15.4	488	32.5	1.4	1.3	14	14	10.6	482.686	0	0	0	1	0	0	0	1	0	1	0	1	0	6	60	30	13	7	0	0	1	1	1
52	2	19.1327	95	77	16	92	36.33	257	4	64.25	5.3	159	10	14.4	136	6.9	1.3	13.7	204.822	32.5	1.3	0.2	71	55	15.9	175	0	1	1	0	0	1	0	0	0	1	0	0	0	7	61	22	12	3	0	0	0	0	0
71	2	32.9083	121	65	18	91	39.39	23	2.6	8.84615	17.3	63	12.8	15.2	141	6.4	9.5	20.5	268	29.3	1.9	2.2	2883	4344	3	5225	0	1	3	1	1	1	0	0	0	1	0	0	0	20	161	60	3	9	1	1	1	1	1
73	1	21.0498	67	88	17	100	36.44	15	1.9	7.89474	18.3	69	15	20.6	147	3.6	5.1	21.3	302	45.4	2	2.2	44	82	1.2	295	0	1	2	1	1	1	0	0	1	0	0	0	0	14	50	39	15	5	1	1	1	1	1
57	1	40.6122	108	74	28	93	37.11	14	3.8	3.68421	6.4	164	13.3	17	141	4.2	0.77	12.7	204.822	46	1.2	0.5	24	43	0.6	296	0	0	0	0	0	0	1	0	0	1	0	0	0	0	21	28	15	3	0	0	0	0	0
66	2	47.8316	76	82	20	100	36.56	54	2.9	18.6207	9.9	193	10.7	16.9	138	3.9	1.6	20.6	204.822	42.3	2	2.4	13	23	4	249	1	1	3	1	0	0	1	0	0	0	0	1	1	11	61	42	15	6	0	0	1	1	1
74	1	23.1755	162	77	12	99	36.17	19	2.7	7.03704	22.4	585	8.2	20.5	143	3.3	1.8	13.2	204.822	26.1	1.1	18	53	89	1.4	482.686	0	1	1	1	0	0	1	0	1	0	0	0	0	6	65	41	15	8	0	0	0	1	0
62	1	21.8254	99	76	19	98	36.44	11	1.9	5.78947	9.6	56	11.1	21.6	138	3.9	1.9	19.3	204.822	55.9	1.8	1.9	18	49	4.8	327	0	1	3	1	0	0	1	0	0	0	0	0	0	10	43	22	15	13	0	1	0	1	0
49	2	35.7759	103	87	25	95	37	11	2.3	4.78261	6.9	41	11.4	17.2	135	3.6	2.3	18.8	111	37.7	1.7	3.3	275	453	0.8	482.686	0	1	2	1	1	0	0	1	0	0	0	1	0	9	47	27	15	3	0	1	0	0	0
69	1	30.4272	86	78	6	98	37	49	3.7	13.2432	11.9	140	10.4	15.2	146	3.3	4.3	13.3	186	28.9	1.2	1	23	58	1.8	299	1	1	2	1	0	1	0	0	0	1	0	0	1	13	95	48	3	8	0	1	1	1	1
65	1	28.3447	109	60	17	98	36.89	3	2.7	1.11111	1.9	29	9.2	14.8	142	3.2	2.7	24.7	108	42.8	2.3	4.6	31	115	0.4	223	1	1	2	1	0	0	0	1	0	0	0	1	0	6	38	37	15	6	1	1	0	1	1
55	1	45	94	62	14	92	37.22	13	2.5	5.2	7.1	128	13.3	13.7	137	3.9	2.2	13.5	501	29.4	1.2	2	44	148	0.8	652	0	1	3	1	0	1	1	0	1	0	0	0	0	7	49	35	15	7	0	0	1	1	1
69	2	22.2825	87	67	15	90	36.78	17	2.1	8.09524	7.3	56	11.4	21	133	3.6	3.8	20.2	151	41	1.9	2.8	35	69	1.1	206	0	1	3	1	1	0	0	0	0	1	0	0	0	8	59	32	15	3	0	0	0	0	0
68	2	33.8365	128	92	20	93	37.89	11	2.5	4.4	12.3	128	11.4	13.3	144	3.7	0.7	17.3	204.822	25.1	1.6	0.7	27	42	0.7	219	0	1	2	1	1	0	0	0	0	1	0	0	0	2	27	28	13	5	0	0	0	0	0
62	1	55.986	106	76	10	97	37.17	9	2.4	3.75	4.6	100	8	15.4	128	3.4	1.4	18.8	204.822	42.1	1.7	2.4	17	31	1.1	189	0	1	3	0	0	0	0	0	0	0	0	1	0	8	48	37	15	5	0	0	1	0	0
54	2	25.8291	94	64	17	100	37	22	2.7	8.14815	6.9	37	10.6	14.6	140	3.4	1	14.5	422	32.8	1.3	5	205	301	0.7	556	0	1	2	1	1	0	0	0	1	0	0	0	0	9	59	36	15	3	0	1	1	1	1
62	2	28.6281	61	69	26	100	36.67	12	3.1	3.87097	3.3	62	10.5	15.5	139	3.5	1.4	18.6	158	37.5	1.7	5.8	38	150	0.5	482.686	1	1	2	1	0	0	0	1	0	0	0	1	0	9	57	37	11	6	1	1	1	1	1
36	1	24.3265	81	94	13	99	36.72	19	3.3	5.75758	12.5	93	10	18	132	3.6	1.6	23.7	133	34.5	2.2	4.4	196	582	1.1	482.686	1	1	2	1	0	0	0	1	0	0	0	1	0	7	47	15	15	3	0	0	0	1	1
69	2	36.2103	97	81	22	99	36.89	25	2.3	10.8696	12.6	160	10.4	14.1	135	6.5	3.1	15.1	204.822	31.7	1.4	1.3	19	20	1	146	1	1	2	1	0	1	0	0	0	0	1	1	0	11	44	31	15	7	0	0	1	1	1
56	2	27.8893	67	77	13	100	36.11	15	2.4	6.25	10.2	83	10.7	17.3	138	3.9	1.5	15.8	204.822	30.1	1.4	2.6	35	40	0.7	185	1	0	0	1	0	0	0	0	1	0	0	1	0	6	45	39	14	5	0	0	0	1	1
38	2	24.8016	107	94	19	87	37	10	2.3	4.34783	7.8	118	9.5	18.6	129	5.4	3.3	17.6	204.822	38.9	1.6	1.8	64	223	0.5	442	1	1	2	1	0	0	0	1	1	0	0	1	0	7	47	41	15	3	0	0	0	1	1
62	2	21.2585	85	73	18	99	37	20	2.5	8	9.9	153	11.3	14.8	137	5	1.5	14.8	204.822	29	1.4	0.9	45	61	1	212	1	1	2	0	0	1	0	0	0	0	0	1	0	1	34	25	15	12	0	0	1	1	1
71	1	26.263	77	59	16	99	35.89	48	2.4	20	15.2	85	7.4	16.9	136	4.6	2.1	15.3	180	26.1	1.4	5.1	25	39	1	318	0	1	2	1	0	0	0	0	0	0	0	1	0	11	61	38	15	5	0	1	0	1	0
65	1	28.0402	56	86	20	95	36.44	53	3.5	15.1429	12.3	84	10.5	19.1	147	3.1	2.8	22.8	204.822	49.2	2.1	2.2	16	31	1.6	482.686	0	1	2	1	0	1	1	0	1	0	0	1	1	8	47	21	13	10	0	0	1	0	0
45	2	27.7469	85	86	16	92	36.5	44	3.8	11.5789	9.6	60	13.3	15.3	131	4.9	1.7	21.7	138	57.4	2	22.3	36	252	2.7	323	1	1	2	1	1	0	1	1	1	0	0	1	1	9	62	23	15	4	1	1	1	1	1
55	2	20.6282	83	99	16	98	36.89	9	2.7	3.33333	9.2	75	14.1	14.3	138	4.5	2.5	20.9	123	51.4	1.9	7.3	231	305	0.5	264	0	1	2	1	0	1	0	0	0	0	0	1	0	12	37	26	15	5	0	0	1	0	0
34	2	18.9388	97	96	20	100	37.39	14	2.8	5	6.4	40	11.9	15.9	131	4.9	2.1	18.2	182	33.2	1.7	16	577	1131	0.8	254	1	1	3	1	0	0	0	0	0	0	0	1	0	7	29	23	15	3	1	1	0	1	1
64	2	31.8878	101	90	14	96	36.67	9	2.6	3.46154	7.8	85	10.4	13.2	120	3.2	3.21904	22	204.822	39.3	2	8.4	46	125	0.7	227	1	1	2	0	0	0	0	1	0	0	1	1	0	10	62	34	15	6	0	0	0	1	1
68	2	21.952	91	52	16	93	36.5	69	3.1	22.2581	9	69	7.3	16.3	136	5	1.5	19.2	204.822	30.5	1.8	0.6	14	31	3.9	482.686	0	1	2	1	0	0	1	0	1	0	1	1	0	9	44	22	15	8	0	0	0	1	0
42	1	44.1114	124	74	29	98	38.28	33	2.7	12.2222	1.1	24	10.9	13.6	143	4	4.6	24.2	348	44.9	2.3	1.5	26	43	2.6	223	1	1	3	1	0	0	0	0	0	0	0	0	0	14	83	42	15	7	1	1	0	1	1
47	2	26.9852	99	97	22	99	37.83	11	2.8	3.92857	25.6	83	9.2	16.5	142	3.3	3.1	20.5	221	33.7	1.9	6.2	21	57	0.5	248	1	1	3	1	0	0	0	0	1	0	0	0	1	5	36	27	15	3	1	0	0	1	1
53	2	29.7942	72	56	13	99	36.89	110	4.4	25	11.7	81	12.5	18	129	3.6	2.3	27.7	150	56.6	2.5	39.1	19	36	11.4	169	0	1	3	1	0	0	0	1	0	0	0	1	0	14	98	25	15	4	1	0	1	1	1
58	1	37.04	94	142	16	100	36.33	90	4.7	19.1489	18.1	95	8.4	18.3	127	5.8	3.5	21.7	158	37.9	2	20.7	37	76	2.4	185	0	1	3	1	0	1	0	0	0	0	0	1	0	18	94	40	15	6	0	0	1	1	1
72	1	18.0697	72	55	18	96	35.44	19	2.3	8.26087	6.8	158	9.8	14	141	4.6	2.9	20.7	94	38.1	1.9	2.2	10	28	0.7	190	0	1	3	1	1	0	0	0	0	0	0	0	0	7	63	38	15	13	1	0	1	1	1
32	2	23.7975	121	90	20	97	37.39	13	2.8	4.64286	11.2	96	9.4	19.8	140	3.4	2.8	17.5	142	44.5	1.6	11	28	120	0.7	173	0	1	3	1	0	0	0	1	1	0	0	1	0	6	41	30	15	4	0	0	0	1	0
56	2	26.8519	89	72	18	100	35	11	1.2	9.16667	9.2	19	5.7	14.7	141	3.8	12	63.8	204.822	150	6.4	1.8	74	205	1	376	1	1	1	1	0	0	0	0	0	0	0	1	0	14	61	38	15	4	1	1	1	1	1
52	2	28.5318	127	113	25	100	37.11	7	2.7	2.59259	16.3	135	14.3	13.8	144	3.2	6.9	13.1	204.822	32.8	1.2	1.7	70	112	0.8	177	0	1	2	1	0	0	0	0	1	0	0	1	0	10	35	35	15	6	0	0	0	0	0
36	2	23.8422	100	77	18	100	37.11	12	2.6	4.61538	3.2	97	8.6	20.6	131	4.4	3.21904	24.4	204.822	47.6	2.3	12.7	43	105	0.8	162	1	1	2	0	0	0	0	1	1	0	0	1	0	8	46	36	14	3	1	0	1	1	1
65	2	49.426	74	94	16	100	36.61	16	3.8	4.21053	7.2	195	13.1	13.3	117	4.3	3.21904	17.8	204.822	70.5	1.6	1.3	29	49	1.7	147	0	1	1	1	0	1	1	0	0	1	0	1	0	3	30	19	15	5	0	0	0	0	0
53	2	22.8175	80	83	21	99	36.83	20	2.8	7.14286	22.5	51	9.7	17.3	142	4.2	2.2	17	204.822	32.4	1.6	6.5	36	63	1.2	199	0	1	3	1	0	0	0	0	0	0	0	0	0	11	32	20	15	5	0	1	1	0	0
67	1	21.1448	98	76	27	92	37.06	14	2.4	5.83333	11.1	401	9.5	15.2	137	4.1	3.21904	13.2	204.822	27.9	1.2	18	53	89	0.5	482.686	0	1	2	0	1	1	0	0	0	1	0	1	0	2	37	36	14	11	0	0	1	1	1
49	1	16.6758	95	82	10	100	36.17	7	2.6	2.69231	14.2	265	11.6	17.8	138	3.2	0.9	15.1	263	27	1.4	4.6	16	20	0.3	178	0	1	2	1	0	0	0	0	0	0	0	0	0	4	50	37	14	1	1	1	0	0	0
53	2	30.1162	105	75	13	100	35.89	95	3.7	25.6757	7	116	10.3	16.2	128	4.7	1.4	17.7	179	41.9	1.6	1.8	67	119	2	130	0	0	0	1	0	0	0	0	0	1	0	1	1	6	60	33	14	7	0	0	0	0	0
75	1	22.3214	98	66	21	92	36.89	26	3	8.66667	6	49	6.8	19.1	134	4.3	2.5	19	166	34.8	1.7	6.7	35	136	1.1	689	0	1	1	1	1	0	0	1	1	0	0	1	1	9	44	26	14	6	0	0	1	1	1
61	2	26.3071	116	109	19	100	37.06	18	2.7	6.66667	12.7	109	14.4	15	140	4	2.2	14.3	197	28.9	1.3	1	208	361	1.1	482.686	0	1	2	1	1	0	0	0	0	0	0	0	0	5	46	28	15	8	0	0	0	0	0
68	1	35.9184	76	85	11	90	37.28	15	3.4	4.41176	13.1	203	8	14.3	139	4.6	2.1	17.8	329	20.7	1.6	0.2	18	33	1	213	0	1	2	1	0	1	1	0	0	1	0	0	0	4	25	31	15	6	0	0	0	0	0
78	2	28.9792	64	71	16	100	36.39	11	2.4	4.58333	9.4	102	8.4	13.5	137	4.3	2.9	18.8	213	30.1	1.7	18	53	89	0.5	482.686	0	0	0	0	1	0	0	0	0	1	0	0	0	5	35	27	14	5	0	0	1	0	0
52	1	19.5637	123	64	18	96	36.17	91	3.3	27.5758	5.7	158	8.3	19.1	129	5.8	1.6	15.5	204.822	52	1.4	0.7	8	16	2.6	174	0	1	3	1	0	0	1	0	1	0	0	1	0	6	81	26	15	7	0	0	1	1	1
61	2	34.9348	94	69	16	95	36.5	29	2.2	13.1818	7.5	37	10.5	21.2	132	4.4	3	16.6	171	36	1.5	13.6	935	1139	0.9	482.686	1	1	2	0	0	0	0	0	0	0	0	0	1	12	59	37	14	5	0	1	1	1	1
63	2	31.002	83	75	23	94	36	38	3	12.6667	14	55	5.8	14	145	5.4	5.6	21.6	122	51.5	2	20.2	17	42	1.6	354	0	1	3	1	1	1	0	1	1	0	1	0	0	10	67	30	15	9	1	1	1	1	1
79	1	49.2156	104	111	23	93	36.78	27	3.7	7.2973	5	117	13.7	14.5	141	5.3	2.9	11.8	396	31.1	1.1	1.7	25	51	1.7	309	0	1	3	1	0	1	1	0	1	0	0	0	1	12	60	46	9	10	0	0	1	0	0
60	2	24.4473	130	96	15	95	37.28	11	2.7	4.07407	9.5	53	10	14.7	135	2.9	1.7	12.1	323	47.3	1.1	5.5	73	315	0.4	433	0	0	0	1	1	1	0	1	0	0	0	0	1	10	52	31	14	6	0	0	0	0	0
47	2	28.7347	83	86	12	98	36.72	47	3.1	15.1613	7.2	37	7.1	18.6	132	4.1	3.21904	22.2	204.822	46	2	23.9	53	75	2	482.686	1	1	1	0	0	0	0	1	0	0	0	1	0	15	60	44	13	3	0	0	1	1	1
53	1	25.1421	77	90	15	100	37.17	25	3.7	6.75676	6.4	93	9	18.7	136	3.4	2.3	18.9	355	35.6	1.7	2.9	25	52	2.3	282	0	1	3	1	0	0	1	1	1	0	0	0	0	7	54	18	15	7	0	0	1	1	1
57	1	19.4734	100	72	30	92	37	23	4.6	5	10.1	55	7.6	17.4	143	4.4	1.5	31.2	107	57.9	2.9	6.7	23	49	0.8	309	1	1	3	1	0	0	0	0	1	0	0	1	0	12	47	40	15	4	1	1	1	1	1
55	1	33.4113	79	69	21	98	37.33	13	2.6	5	5.2	49	7.4	20	137	3.3	1.9	27.6	102	29	2.6	10.3	21	85	0.6	351	0	1	3	0	1	0	0	0	0	0	0	1	0	8	52	36	14	2	1	0	1	0	0
73	2	31.7647	98	73	21	98	36.72	81	3.1	26.129	15.7	73	12.6	22.5	133	5.3	1.9	52.7	409	150	4.9	26.3	26	90	3.6	754	1	1	3	1	0	0	1	0	1	0	0	1	0	14	97	39	14	9	1	1	1	1	1
78	2	33.7823	92	70	18	94	36.61	90	3.7	24.3243	15.4	121	9.3	27.9	141	4.6	4.5	23.8	157	47.4	2.2	4.7	30	36	5.3	301	1	1	3	1	0	1	1	1	0	1	1	0	0	19	113	50	3	12	1	0	1	1	1
67	2	46.0601	67	87	9	97	37.94	16	2.8	5.71429	10.9	139	10	15.1	144	3.3	3.1	23.1	115	55.8	2.1	4.1	1976	2637	0.8	482.686	1	1	2	1	1	1	0	0	0	0	0	0	0	10	36	32	14	8	1	1	0	1	1
36	1	22.6015	102	99	18	100	37.06	13	2.9	4.48276	6.3	48	8.8	16.3	142	3.4	5.4	31.2	62	101.1	2.8	4.5	107	389	0.4	542	1	1	2	1	0	0	0	1	0	0	0	1	0	8	28	31	15	3	1	1	0	1	1
61	2	30.2225	101	103	22	94	36.78	36	2.8	12.8571	20.6	259	9.3	19.1	146	4.4	4.1	19.2	204.822	32	1.8	1.3	25	48	0.7	205	0	1	1	1	1	1	0	0	0	0	0	1	0	4	49	38	7	9	0	0	0	0	0
60	2	33.5353	103	97	19	100	36.78	32	3	10.6667	10.7	71	10	15.5	133	5.9	2.8	15.2	201	26.6	1.4	3.9	43	49	1.2	265	1	1	2	1	1	1	0	1	0	1	0	0	0	7	59	43	13	7	1	1	0	1	1
59	1	34.0136	82	104	14	100	35.33	102	2	51	9.1	108	9	15.3	136	5.8	3.2	17.5	204.822	37.9	1.6	2.8	23	47	7.7	302	1	1	1	1	0	1	0	0	0	0	0	1	1	14	101	26	9	7	0	0	1	1	1
63	2	31.5886	104	99	26	97	36.11	58	3	19.3333	3.8	65	12.9	15.6	140	5	15	17.3	140	52.3	1.6	1.8	163	243	1.4	780	1	1	3	1	1	1	0	0	0	1	0	1	0	11	70	40	15	6	0	0	1	1	1
65	2	23.4405	95	93	27	99	37	93	1.7	54.7059	30.3	162	10	18.3	141	3.4	2.1	29.3	204.822	35.2	2.7	17.7	52	145	3	528	0	1	3	1	0	0	0	1	0	0	0	1	0	11	76	22	15	9	0	0	0	1	0
62	1	35.7851	79	63	22	95	35.22	91	2.4	37.9167	33.3	199	10.6	21	137	3.8	3.21904	19.3	367	53.5	1.8	24.3	43	156	5.6	449	1	1	3	1	0	1	0	1	1	0	0	0	0	10	83	27	13	7	0	0	1	1	1
56	1	29.6484	75	62	20	89	36.78	38	3.9	9.74359	2.6	65	10.6	18	138	3.9	2	21.5	124	64.3	2	7.1	22	43	1.5	245	1	1	3	1	0	0	1	0	1	0	0	1	0	16	77	44	14	8	1	0	1	1	1
57	2	36.1749	94	86	21	96	36.67	92	2.6	35.3846	5.9	81	8.9	15.5	125	3.7	3.21904	12.6	204.822	29.4	1.2	1.5	65	103	15.1	593	1	1	3	0	1	1	0	0	0	1	0	0	0	8	62	28	15	5	0	0	0	1	1
53	2	25.2761	66	89	13	98	37.11	19	2.8	6.78571	8.5	49	9.9	23.7	132	3	1.6	19.4	204.822	60	1.8	26.3	53	84	4.5	214	0	1	1	1	0	1	0	1	0	0	0	1	0	15	105	41	7	8	0	0	1	1	1
53	2	24.8016	87	91	8	98	36.8	9	3	3	3.1	75	7.6	15.3	134	3.1	1.9	18.5	155	32.6	1.7	5.8	29	72	0.6	279	0	0	0	0	1	0	0	0	0	0	0	0	1	7	16	12	12	4	0	0	0	0	0
70	2	23.4568	75	61	23	97	37.39	44	3.5	12.5714	7	31	7	21.4	137	4.2	1.7	25.1	67	47.3	2.3	4.3	11	27	2.1	323	1	1	2	1	0	0	0	0	1	0	1	1	0	11	59	36	15	10	1	1	1	1	1
66	2	28.6159	83	99	15	100	36.94	26	2.8	9.28571	12.6	107	11.7	13.7	138	4.7	1.2	16.1	120	39.5	1.5	2.2	229	734	1.3	482.686	0	1	2	1	1	0	0	0	0	0	0	0	0	10	43	30	15	5	0	0	0	1	0
33	2	27.9495	128	73	25	93	37.22	14	2.4	5.83333	13.2	1018	12.6	14.9	133	5.1	2.1	15.8	204.822	35.1	1.4	1.1	15	20	1.3	212	0	1	3	1	0	0	0	0	0	0	0	1	0	3	47	26	15	5	0	0	1	0	0
67	1	22.9591	106	61	30	92	37.06	12	3	4	19.2	323	8.9	19.5	138	3.3	1.1	16.6	204.822	36.2	1.5	0.9	8	14	3.3	173	0	1	3	1	0	0	1	0	1	0	1	1	0	6	30	27	15	7	0	0	1	1	1
63	2	27.4235	137	63	16	98	36.83	25	1.9	13.1579	4.2	252	8.3	16.2	139	4.1	5.8	20	204.822	40	2	2.1	305	399	1.9	344	0	1	2	1	0	0	0	0	0	0	0	0	0	5	57	31	15	9	0	0	1	0	0
51	2	29.7531	106	115	27	96	36.83	8	4.2	1.90476	8.4	65	12.6	12.7	139	4.6	2.3	14.5	204.822	30.5	1.3	1.3	19	31	0.7	214	0	1	2	1	1	1	0	0	1	1	0	1	0	5	42	35	13	3	0	0	0	0	0
62	2	26.9274	128	71	14	98	37.11	25	3.1	8.06452	20.2	243	7.9	20.1	137	3.5	3.7	20	204.822	40	2	0.7	6	10	2	95	0	1	1	0	0	0	0	0	0	1	0	1	0	4	56	35	15	13	0	0	0	1	0
40	2	23.0533	152	102	30	100	38.28	6	2.4	2.5	3.8	43	10.2	14.3	137	3.8	8.2	16.1	208	48.3	1.5	1	53	89	0.6	322	1	1	2	1	0	0	0	0	0	0	0	1	0	8	53	33	14	3	0	0	1	1	1
52	2	25.1386	87	73	11	96	37.83	19	2.4	7.91667	9.2	233	8.3	14.9	140	4.1	1.4	15	417	31.7	1.3	0.6	6	19	0.7	192	0	1	3	1	1	0	0	0	0	1	0	0	0	6	26	27	15	4	0	0	0	0	0
75	2	27.0337	63	99	21	100	36.44	90	2.3	39.1304	6.2	75	6.5	15.6	130	4.1	3.8	18.1	114	29	1.6	1	56	110	2.9	260	0	1	2	0	0	1	1	0	1	1	0	0	0	5	69	31	15	12	0	0	1	1	1
64	1	23.8095	102	65	17	95	35.83	32	2.4	13.3333	2.4	40	9.9	18.1	136	3.7	2.9	18.1	111	38	1.6	23.9	70	57	1	262	0	1	1	1	0	0	0	0	0	0	0	0	1	9	97	33	14	5	1	1	1	1	1
61	2	29.111	105	112	20	94	35.22	22	2.8	7.85714	13.3	102	8	24.8	131	3.4	3.7	28.6	141	50.9	2.8	29.6	45	76	0.4	482.686	0	1	3	1	1	0	0	1	1	0	0	1	1	7	54	31	14	5	1	0	1	1	1
72	1	27.7893	64	87	16	100	34.89	12	3.4	3.52941	3.5	90	10.3	15.7	141	4	2.2	11.9	186	25.1	1.1	3.3	23	55	0.7	240	1	1	3	1	0	0	0	0	0	0	0	0	0	16	89	49	3	7	1	0	0	1	1
57	2	27.1731	99	73	17	94	36.44	87	2.6	33.4615	11.4	161	11.1	16.7	130	6.7	3.7	15.7	199	25.5	1.5	10.9	129	322	5.7	1397	0	1	3	1	1	0	0	1	0	0	0	1	0	10	66	34	13	4	0	0	0	0	0
76	2	37.7161	103	81	31	97	36.94	24	2.4	10	14.3	172	8.7	15	134	5.1	1.2	11.8	204.822	26.9	1.1	0.5	29	40	0.7	203	1	1	2	0	0	0	1	0	0	1	1	1	0	4	45	35	15	7	0	0	1	1	1
56	2	39.1365	64	88	24	100	36.72	21	2.7	7.77778	5.8	63	11.2	17.3	138	4.8	3	20	128	36.5	1.8	6.9	13	51	1.4	245	1	1	3	1	1	1	0	1	0	1	0	1	0	14	84	47	15	8	1	1	1	1	1
40	1	21.5065	91	69	20	93	36.83	7	3.6	1.94444	11.3	136	7.1	23	143	3.2	2.5	33.1	204.822	48.6	3	24.1	45	111	0.4	334	0	1	2	1	0	0	0	1	1	0	0	1	0	7	50	38	13	4	0	0	1	1	1
55	2	30.3642	85	67	9	92	37.56	21	2.6	8.07692	5.1	63	8.4	21.2	131	3.3	0.8	10.7	525	26.1	1	1.2	81	214	0.8	365	0	0	0	1	0	1	1	0	1	1	0	1	0	5	46	36	15	15	0	0	1	0	0
57	2	17.3611	111	89	19	100	37.06	33	3.2	10.3125	7.6	63	9.9	16.3	141	5.4	2.6	18.9	86	35.7	1.8	4.2	30	47	0.7	317	1	1	2	1	1	0	0	0	0	0	0	1	0	10	56	38	15	5	1	1	1	1	1
61	2	30.7564	64	109	18	100	37.33	20	2.9	6.89655	11.5	90	7.9	15.9	139	4.7	1.9	16.1	228	31.9	1.5	1.4	242	373	1.6	277	0	1	1	1	0	0	0	1	0	0	0	0	0	9	26	24	15	9	0	0	1	0	0
62	2	33.6827	99	80	19	90	36.06	20	2.4	8.33333	7.5	187	13.8	15.8	136	4.7	1.8	20	204.822	40	2	18	53	89	1.2	482.686	0	1	2	1	1	0	1	0	1	0	1	0	1	6	47	39	14	7	0	0	1	0	0
58	2	29.952	82	71	16	95	36.67	20	2.8	7.14286	8.6	95	7.6	18.8	138	3.4	3.9	15.5	182	26	1.4	5.8	101	171	0.7	446	1	1	3	1	0	1	0	0	0	0	0	0	0	5	53	42	15	5	1	1	1	1	1
69	2	27.0975	58	84	6	98	36.89	15	2.3	6.52174	12.3	79	13	18.3	139	3.6	0.5	18.1	177	36.5	1.6	6.6	147	264	0.7	421	0	1	3	1	0	0	0	1	0	0	0	0	0	10	64	31	15	7	0	1	0	0	0
71	2	19.3048	94	79	15	95	36.78	49	3.5	14	7.2	52	8.9	20.3	140	5.4	3.7	16.5	135	32.9	1.5	2.5	28	46	2.2	214	1	1	1	1	1	1	0	1	1	0	1	1	0	15	51	34	15	8	0	0	1	1	1
53	2	31.6885	91	68	18	100	36.61	25	2.6	9.61538	14.4	118	4.7	18.1	142	4.2	3.2	32.7	90	35.7	3	4.1	32	90	0.8	239	1	1	2	1	1	0	0	1	0	1	0	1	0	8	27	26	15	5	1	1	0	1	1
52	2	22.6642	149	94	49	96	37.33	19	3	6.33333	9.3	115	11.1	18.8	131	3.9	3.2	19.9	204.822	41.9	1.8	29.2	48	230	1.2	293	0	1	3	1	0	0	0	1	0	0	0	0	0	10	108	50	9	4	0	1	1	1	1
61	2	27.1809	91	112	14	96	36.78	15	3.4	4.41176	19.2	142	15.2	13.6	139	4.1	1.6	17.5	204.822	87.2	1.6	1	15	21	0.9	236	0	1	2	0	1	0	0	0	0	0	0	1	0	5	45	39	15	3	0	0	1	1	0
63	2	22.8571	80	54	14	100	37.22	23	2.8	8.21429	14.2	119	7.4	15.7	141	3.6	6.8	21.3	115	43.3	1.9	0.6	22	106	0.9	408	0	1	1	1	0	0	0	0	0	1	0	0	0	6	40	33	15	3	1	0	1	0	0
68	2	28.3447	57	53	16	97	35.56	122	3.4	35.8824	9.6	360	8.7	13.2	132	4.7	0.7	13.3	204.822	42.4	1.2	0.5	24	37	6.9	482.686	0	1	1	1	0	0	0	0	1	1	0	1	1	10	80	28	12	9	0	0	1	1	1
61	1	19.304	74	48	17	95	36.78	64	2.6	24.6154	18.3	116	10.9	14.9	129	5.1	1	12	369	46	1.1	0.3	10	17	7	130	0	1	3	1	0	0	0	0	1	0	0	1	0	7	75	33	13	6	0	0	0	0	0
32	2	49.827	90	90	37	93	36.67	19	2.3	8.26087	12.8	121	13.5	12.4	126	3.9	2	19.6	204.822	31.2	1.8	2.1	31	35	1	268	0	1	2	1	1	1	0	0	1	0	0	1	0	6	57	31	14	2	0	0	1	0	0
68	1	26.7503	73	97	9	97	36.56	16	3.7	4.32432	4.7	249	11.6	17.2	143	4.2	3.21904	12.3	204.822	32.8	1.1	1.5	8	13	1	228	0	1	3	0	1	1	0	0	0	1	0	0	0	2	17	21	14	6	0	0	0	0	0
66	1	34.5451	97	71	19	99	36.44	9	3.9	2.30769	6.1	126	6.4	24.9	136	2.9	11.6	23.3	114	41.1	2.1	15.1	88	162	2.3	556	0	1	1	1	1	0	0	1	0	0	1	1	0	10	60	33	15	6	0	0	1	0	0
67	2	30.754	77	122	16	95	36.83	10	2.4	4.16667	4.8	205	12.2	12.9	132	3.2	3.21904	13.5	204.822	42.8	1.2	18	53	89	0.7	482.686	0	1	2	0	1	0	0	0	0	1	0	1	0	1	30	26	13	6	0	0	0	0	0
67	2	35.9269	72	106	28	95	36.94	73	3	24.3333	10.2	106	8.7	14.6	144	5.4	0.8	12.6	323	30.3	1.2	0.3	11	16	3.5	216	0	1	3	1	0	1	0	1	0	0	1	0	0	10	61	34	15	10	0	0	0	0	0
51	1	43.6036	66	97	13	100	36.44	30	3.8	7.89474	8	148	11.2	17	138	3.4	3.21904	12.3	482	26	1.1	0.4	17	38	5.2	482.686	1	1	1	0	0	1	1	0	1	1	0	0	0	7	42	30	14	12	0	0	1	1	1
73	2	30.1041	80	57	8	100	36.67	17	2.4	7.08333	18.6	185	8.9	15.4	136	4.7	3.8	20.9	343	42.6	1.9	3.1	75	129	0.9	420	0	1	2	1	1	0	1	0	0	0	1	0	0	7	51	35	15	6	1	0	1	0	0
54	1	28.9824	65	78	15	95	36.61	9	2.5	3.6	3.4	75	10.7	17.1	141	4.7	1.5	18.4	189	47.7	1.7	1	10	28	0.7	226	0	1	2	0	0	1	0	0	0	0	0	1	0	3	40	24	15	5	0	0	0	0	0
57	2	23.656	77	69	23	95	36.56	37	2.8	13.2143	1	38	11.1	17.4	130	5.3	5.1	19.3	582	150	1.8	0.9	20	27	6.4	91	0	1	3	1	0	0	0	0	0	0	0	1	0	9	60	36	15	8	1	1	1	1	1
66	2	26.8745	121	96	16	100	37.39	31	3	10.3333	1.6	127	7.7	18	145	3.9	1	30.4	189	38.6	3	5.1	527	819	1.5	299	0	1	3	1	0	1	0	0	0	0	0	0	0	8	49	30	15	6	0	1	1	0	0
77	2	33.3542	72	73	18	98	35.94	95	3.6	26.3889	8.9	174	12.6	15.3	137	4.5	2.8	32.8	295	46	3.3	2	15	20	5.7	482.686	0	1	2	1	0	0	1	0	1	0	0	1	0	12	43	48	15	7	1	0	1	0	0
57	1	26.5731	105	72	20	97	36.39	45	4.7	9.57447	11	216	6.5	17.3	130	4.1	2.1	25.1	160	64.4	2.3	3.5	15	31	3.3	195	0	1	3	1	0	0	0	0	0	1	0	1	0	17	139	49	3	5	1	0	1	1	1
71	1	27.3034	92	80	22	98	37.06	10	2.8	3.57143	12.1	93	12.5	13.3	137	3.6	1.2	16.2	324	68	1.5	1	43	64	0.7	638	0	1	3	1	1	0	0	0	1	1	0	1	0	6	33	37	15	6	1	1	1	1	1
57	1	33.4113	106	81	19	96	36.56	27	2.4	11.25	13.7	198	11.8	14.4	137	3.5	3.21904	12	204.822	34.8	1.1	18	53	89	1.2	482.686	0	1	2	1	0	0	1	0	0	0	1	0	0	2	38	24	15	5	0	0	0	0	0
73	1	20.5693	74	80	21	99	36.72	30	2.7	11.1111	12.1	39	11.5	17.4	130	3.7	4.2	20	179	32.7	1.9	7.6	32	32	0.8	226	1	1	3	1	0	0	0	1	1	0	0	1	0	13	63	29	13	9	0	0	1	1	1
55	2	31.0728	86	77	21	89	37.06	52	3.4	15.2941	15.9	102	9.6	19.2	142	3.3	1.1	20.4	204.822	33.7	1.9	10.9	24	67	2.3	322	0	1	2	0	1	0	0	0	1	0	0	1	0	7	58	27	15	6	0	0	0	0	0
55	1	38.8461	90	74	29	94	36.78	8	2.5	3.2	5.6	51	6.7	15.5	132	3.6	3.21904	23.8	190	31.3	2.2	11.8	24	43	0.3	268	1	1	2	1	0	0	0	0	1	0	0	1	0	7	54	36	15	4	0	0	1	1	1
79	2	20.4618	120	83	29	100	35.89	75	3.5	21.4286	17.1	174	8.8	14.6	139	5.6	17	11.4	204.822	27	1.1	0.3	21	24	6.3	482.686	0	1	3	1	0	1	1	0	1	1	0	0	0	12	119	62	3	11	0	0	0	0	0
60	2	24.2468	96	89	20	100	37.06	15	2.8	5.35714	11.2	83	9.7	20	134	4.2	4.1	18.1	187	35.6	1.7	5.3	425	656	1	482.686	1	1	2	1	0	0	0	1	0	0	0	1	0	11	40	33	14	4	0	1	0	1	1
55	1	16.0502	118	76	12	100	37.22	15	2.4	6.25	5.8	104	7.8	25.9	140	4.2	2.6	12.2	192	26.6	1.1	0.4	40	61	0.6	302	0	0	0	0	0	1	0	0	0	0	0	1	0	8	48	35	13	5	0	0	0	1	0
65	2	32.3306	108	113	18	100	37.06	18	2.5	7.2	5.1	63	9.8	18.7	143	4.1	5.5	15.5	198	39.2	1.4	4	378	694	1.4	497	0	1	2	1	1	1	0	0	0	0	0	1	0	8	41	32	15	9	0	1	1	0	0
52	2	26.8389	105	92	17	92	36.78	65	3	21.6667	8.6	134	12.4	16.9	136	4.2	3.7	16.9	360	27.8	1.5	13.2	67	327	1.3	1682	0	0	0	1	1	0	0	0	1	0	0	1	1	8	64	27	12	10	0	0	1	1	1
66	2	37.2732	85	70	14	100	36.44	66	3.1	21.2903	9.7	84	11.1	19.3	128	4.6	2.6	27.1	102	53.6	2.5	37.9	55	163	3.9	220	1	1	3	1	1	0	0	0	0	1	0	1	0	10	92	32	15	7	1	1	1	1	1
59	2	27.4589	86	87	18	92	36.72	15	3.5	4.28571	5.9	156	7.1	17.2	144	3.8	1.1	13.4	204.822	33.3	1.2	0.5	22	27	1.1	191	1	1	2	1	1	0	1	1	0	0	0	1	0	6	33	24	14	7	0	0	0	1	1
76	2	18.8581	80	58	21	100	36.5	19	3.9	4.87179	7.7	143	7.8	29	137	3.9	1	14.2	204.822	35.2	1.3	2.2	10	23	0.8	171	0	1	2	1	0	0	1	0	0	1	1	1	0	4	48	26	15	8	0	0	0	0	0
64	2	28.0864	86	88	23	100	36.67	23	2.7	8.51852	17.8	75	9.6	15.5	139	5.2	7.1	17.4	136	45.9	1.6	2.9	890	1739	1	482.686	0	1	2	1	0	1	0	1	0	0	0	1	0	7	43	33	15	7	1	1	1	0	0
77	2	29.2659	142	77	29	100	39.94	17	2.5	6.8	1.7	63	8.4	18	137	4.5	4.9	16.3	260	131.2	1.4	1.4	15	399	1.3	1199	0	1	1	1	0	1	0	0	1	1	0	0	0	9	76	41	14	5	0	0	1	1	1
50	2	29.2484	104	70	24	100	37.28	12	2.3	5.21739	10.8	104	8.7	16.7	138	5	8.6	21.7	123	40.6	2	8	206	269	1	407	1	1	2	1	0	0	0	0	0	1	0	1	0	11	65	30	15	4	1	1	0	1	1
36	1	28.2738	94	107	27	92	36.28	8	1.8	4.44444	19	91	8.3	16.5	132	3.5	1.3	18.8	279	31.4	1.7	5.3	55	104	0.5	198	0	1	3	1	0	0	0	1	1	1	0	0	0	10	68	39	12	1	0	0	0	0	0
61	1	23.5375	97	96	20	100	36.89	13	4	3.25	13	140	8.9	11.5	141	3.7	7.1	20.5	185	30.2	1.9	1.4	212	578	1	246	0	1	1	1	0	0	0	0	0	0	0	0	0	8	31	19	15	6	0	0	0	0	0
54	2	23.6669	98	100	13	95	35.56	14	2.4	5.83333	10.1	119	10.6	16.2	130	3.4	3.21904	40.3	204.822	46.2	4.2	23.7	149	305	1.2	482.686	0	0	0	1	1	0	0	0	0	0	0	1	0	7	54	29	14	3	1	0	0	1	0
77	2	20.9877	67	88	22	94	35.83	11	2.9	3.7931	5.8	236	10.7	16.6	141	3.3	3.21904	14.4	204.822	32.8	1.3	0.7	11	21	0.7	308	0	1	2	0	1	0	1	0	0	0	0	1	0	2	30	38	14	11	0	0	1	0	0
39	1	30.4705	114	121	19	97	36.89	26	3.4	7.64706	9.3	66	14.6	13.2	146	3.6	1.8	15.6	238	32	1.4	4.4	168	223	1.4	418	0	1	1	1	0	0	1	1	1	1	0	1	0	11	44	30	14	6	0	0	1	0	0
41	1	19.6287	56	53	13	98	36.44	73	3.7	19.7297	2.8	51	8	19.1	136	4.5	1.4	26.1	204.822	56	2.6	32.3	128	226	2.8	213	0	1	2	1	0	0	0	0	0	0	0	1	1	13	90	25	12	3	1	1	0	0	0
65	2	28.534	86	93	20	99	37.67	26	3.1	8.3871	8.2	53	8.4	17.9	145	4.3	3.3	24	155	33.2	2.2	4.9	2008	5788	1.4	482.686	0	1	2	1	0	1	0	0	0	0	0	1	0	9	63	33	14	9	0	0	0	0	0
34	2	34.4033	102	86	25	93	37.33	9	3.7	2.43243	5.4	35	9.7	14.6	137	2.7	2.6	16.6	204.822	30.5	1.5	8.8	30	223	0.9	438	0	0	0	0	1	0	0	1	0	0	0	1	0	7	48	26	14	2	0	0	0	0	0
62	2	29.195	77	84	21	98	37.06	21	2.5	8.4	6.1	97	6.9	15.5	144	3.5	1.9	14.7	160	26.2	1.4	0.5	14	18	0.7	157	0	1	3	0	0	0	0	1	0	1	0	0	0	6	46	37	15	8	1	1	0	0	0
50	2	26.4668	91	84	21	100	36.83	34	2.7	12.5926	7.4	52	8.4	15.8	138	5.6	4	21.5	101	38.7	2	2.4	30	52	0.7	211	1	1	2	1	0	1	1	0	0	0	0	1	1	6	60	39	15	7	1	1	0	1	1
61	2	28.7603	77	93	22	93	37.17	35	3.8	9.21053	5.5	77	10.9	20.8	139	4.4	3.4	23.3	215	47.6	2.1	42.6	1221	659	1.6	958	0	1	2	1	0	0	0	1	0	0	0	1	0	8	54	27	13	7	0	0	1	1	1
59	2	43.6508	91	91	15	99	36.67	25	3.2	7.8125	8.2	69	5.9	17.2	111	4.5	1.6	16.8	204.822	33.5	1.5	5	43	88	1.3	287	1	1	2	1	1	1	0	1	0	1	1	1	0	6	48	23	15	9	0	0	1	1	1
70	1	37.2238	56	63	18	100	37.06	23	3	7.66667	4.2	43	5.5	15.2	142	3.6	2.7	24.3	206	35.3	2.3	1.1	24	58	0.8	243	0	1	3	1	0	1	1	1	0	0	0	0	0	11	60	50	8	8	0	1	1	0	0
38	2	31.6564	127	72	19	100	37.44	10	2.7	3.7037	5.3	58	8.2	17.2	150	3.6	3.7	15.7	265	38.6	1.4	1.5	23	49	0.6	337	0	1	2	1	1	0	0	1	1	0	0	1	0	11	33	34	15	1	0	0	0	0	0
61	2	39.0979	85	72	20	100	36.67	54	3	18	11.1	304	9.3	15.1	139	5.8	1.7	13.4	204.822	30.3	1.2	0.8	8	16	6.9	182	0	1	1	1	0	1	1	1	0	1	0	0	0	6	34	20	14	11	0	0	0	1	0
65	1	24.0221	90	64	19	96	36.5	31	4.2	7.38095	13.4	210	7.2	18.1	128	3.1	2.9	18.5	184	40.2	1.7	2.6	16	63	1.1	482.686	1	1	2	1	0	0	0	1	0	0	0	0	0	7	54	37	15	9	0	0	1	1	1
69	2	23.255	62	106	21	98	36.67	13	4.5	2.88889	14.3	208	10.9	12.1	134	3.7	3.21904	10.8	204.822	30.8	1	0.5	17	25	0.9	157	0	1	2	0	1	0	0	0	0	0	0	0	0	3	42	29	12	4	0	0	0	0	0
74	2	28.7698	70	79	13	100	36.61	17	2.7	6.2963	6.2	162	7	17.6	117	4.3	3.21904	12.3	204.822	36.1	1.1	1.4	66	58	0.6	182	0	1	2	1	0	0	1	0	0	0	1	1	0	3	36	22	15	10	0	0	1	0	0
61	1	26.7503	85	74	19	93	35.67	49	2.6	18.8462	15.1	296	7.9	18.6	130	2.4	4	18.9	129	37	1.7	19.6	40	76	1.7	346	0	1	3	1	0	0	0	1	1	0	0	1	0	10	64	42	14	7	0	0	1	1	1
77	1	26.1834	109	62	28	97	37.61	45	3.8	11.8421	31	28	4.9	20.2	139	4.1	3	17.7	192	32.9	1.6	1.1	12	30	2.2	537	0	1	1	1	0	0	0	0	0	1	1	1	0	7	55	29	15	10	0	0	0	1	0
70	1	15.6604	79	79	15	91	36.5	71	3.4	20.8824	18	60	9	17.3	147	4.4	1	12.2	204.822	25.1	1.1	0.5	16	44	2.2	336	1	1	2	1	0	1	0	0	0	1	1	1	0	6	41	29	14	13	0	0	1	1	1
66	2	28.5008	61	88	22	98	37.11	24	2.5	9.6	5.7	56	9.4	21.8	148	5.1	2.4	18.1	272	39.1	1.7	20	187	501	1.2	482.686	0	1	2	0	0	1	0	0	0	1	0	1	0	12	48	29	15	7	0	0	0	0	0
49	2	44.2215	95	79	13	100	36.83	47	3.1	15.1613	8.7	35	9.2	14.6	132	3.1	3.21904	18.8	204.822	45.5	1.7	4.2	13	20	1	254	0	1	3	1	0	1	0	0	0	0	0	0	0	12	80	26	8	5	0	0	1	0	0
64	2	38.2212	119	97	25	98	36.44	41	2.6	15.7692	14.4	157	11.3	18.2	134	4.9	2.1	21.5	204.822	45.1	2	3	16	25	2	355	0	1	2	1	0	1	1	0	0	1	0	1	0	7	67	30	14	8	0	0	0	1	0
55	2	28.2669	117	114	40	93	36.89	40	4	10	17.3	71	10.4	23.8	151	4.1	2.6	27	216	28.7	2.5	53.6	60	134	1	534	0	1	3	1	0	0	0	1	0	0	1	1	0	18	101	53	12	6	0	0	1	1	1
58	1	18.6366	68	53	13	98	36.61	14	3.1	4.51613	13.2	174	7.5	17.9	137	4.3	1.5	14.9	204.822	32.1	1.4	0.6	53	20	0.9	101	1	1	1	0	0	0	0	0	0	0	0	1	0	2	33	26	15	8	0	0	0	1	1
66	1	32.3129	75	88	24	89	37.72	19	3.1	6.12903	11.7	48	10.3	17.2	132	3.9	1.4	19.5	204.822	32.9	1.8	2.2	17	47	0.9	250	0	1	2	1	1	0	0	1	0	0	0	0	0	7	38	34	14	5	0	0	0	0	0
52	1	24.8128	118	57	30	95	35.33	58	2.5	23.2	27.8	152	7.5	15.8	151	3.7	6.2	19.3	237	44.9	1.8	2.3	22	56	1.7	414	1	1	3	1	1	0	0	0	0	0	0	1	0	14	106	42	15	6	1	1	1	1	1
64	1	31.198	67	64	19	97	36.44	60	3.8	15.7895	20.3	148	6.4	21.4	148	4	3.3	24	204.822	44.6	2.2	31.2	22	39	1.3	283	0	1	3	1	0	0	0	0	1	0	0	1	0	18	101	45	11	6	0	0	1	1	1
64	2	23.9184	74	60	15	100	34.22	36	3	12	3.4	13	10.3	19.1	127	5.1	7.8	29.2	85	48.4	2.8	7.5	61	138	2.4	350	1	1	3	1	0	1	0	0	0	0	0	0	0	15	103	45	14	7	1	1	1	1	1
57	2	24.9036	94	111	14	100	35.33	26	4.1	6.34146	2.8	23	8.5	19.1	133	4.7	3	27.9	204.822	56.7	2.7	4.1	18	35	3.5	183	1	1	3	1	0	1	0	0	0	0	0	1	0	15	95	42	12	7	1	1	1	1	1
72	1	27.7344	96	61	35	100	36.67	12	2.4	5	23.8	280	9.5	14.2	141	3	1	15.6	204.822	32.2	1.4	0.4	18	30	0.8	166	0	0	0	1	0	1	0	1	1	1	0	0	0	5	30	30	14	5	0	0	1	0	0
62	2	40.0723	102	78	12	100	37	122	3.7	32.973	3.2	52	6.8	15.7	132	4	2.3	17.8	204.822	42.4	1.7	1	32	35	1.7	191	0	0	0	1	0	1	1	0	0	0	0	0	1	4	32	27	15	11	1	0	0	0	0
63	1	39.6471	88	85	19	95	36.83	27	3.3	8.18182	4	89	8.8	18	141	3.9	1.3	16.9	204.822	30.4	1.5	1.6	19	25	1.4	252	0	1	3	0	0	1	1	1	0	0	0	1	0	6	51	20	15	10	0	0	0	0	0
68	2	31.8169	65	98	17	100	36.39	63	2.7	23.3333	12.6	103	8.3	14.7	141	4.2	1.7	11.8	204.822	27	1.1	0.8	54	24	1	381	0	1	2	0	1	0	0	0	0	1	1	1	0	6	45	28	14	4	0	0	1	1	1
59	1	23.4375	88	118	18	100	36.67	49	2.9	16.8966	4.2	67	8.3	14.8	142	4	1	15.1	204.822	29.9	1.4	1.4	11	24	1.9	151	0	1	1	1	0	0	0	0	1	0	0	1	0	8	27	28	15	8	0	0	0	1	0
65	2	79.3651	97	75	23	100	37.33	21	2.4	8.75	13.3	187	10.5	17.5	140	4.4	1.8	25.5	204.822	29.6	2.4	3.6	12	39	1.5	279	0	1	3	1	0	1	1	1	0	0	0	0	0	4	42	26	15	8	0	0	0	0	0
76	2	28.9349	60	69	16	96	36.56	46	2.4	19.1667	3.8	175	9	20.4	133	4.1	1.4	12.2	204.822	30.8	1.1	18	12	41	2.5	278	0	1	3	1	0	1	1	0	0	0	0	0	0	5	57	31	15	9	0	0	0	1	0
78	1	20.7625	79	71	13	99	36.94	22	3	7.33333	2	33	4.6	17.4	140	3.3	3.21904	15.8	217	29.8	1.5	1	22	24	0.4	277	0	0	0	0	0	0	0	0	0	0	0	1	0	6	51	30	15	6	0	1	1	0	0
78	2	33.3404	47	59	11	97	36.33	19	3.3	5.75758	5	114	11.2	15.1	133	4	1.9	18.5	204.822	37.3	1.7	3.8	34	63	0.8	247	0	1	3	0	0	0	0	0	0	0	0	0	1	7	51	30	14	8	0	0	0	1	0
51	2	69.1411	96	94	24	100	36.72	17	1.8	9.44444	6.9	83	11.4	18.1	135	3.8	5.2	25.8	80	53.7	2.4	5.7	29	83	1.1	335	0	1	3	1	1	0	0	1	1	0	0	1	0	13	46	44	15	4	1	1	1	1	1
73	1	15.873	79	61	10	100	36.33	15	2.4	6.25	12.1	127	9.4	14.8	130	3.8	2.1	14.5	204.822	33.5	1.3	2.2	19	22	0.6	482.686	0	1	1	1	0	1	0	0	1	0	0	1	0	4	50	36	15	6	0	0	1	0	0
57	2	45.129	97	86	20	97	35.33	21	3.2	6.5625	9.9	98	7.6	21.2	129	4.7	2.9	24.5	117	50.4	2.3	11.5	67	110	1.2	335	0	1	3	0	1	1	1	0	0	0	0	1	0	12	88	35	6	7	1	0	1	1	0
62	2	32.6222	80	80	11	97	36.17	13	2.5	5.2	6.2	73	11.3	15.3	135	4.5	2.3	14.9	204.822	31.1	1.4	2.7	35	51	0.7	197	0	1	1	0	0	0	1	1	0	0	0	0	0	8	43	39	15	10	0	0	0	0	0
59	2	34.3679	118	66	27	92	37.33	10	3.1	3.22581	9.9	89	8.4	17.6	136	4.2	2.3	28.3	204.822	36.1	2.6	2.5	244	1760	1.2	1336	1	1	3	1	1	0	0	1	0	0	1	1	0	10	48	37	15	6	0	0	1	1	1
56	2	35.7851	127	106	28	90	36.94	6	3	2	12.3	153	10	19.5	135	3.3	6.1	21.5	204.822	43.3	2	17.2	19	78	0.6	353	0	1	3	0	0	0	0	1	0	0	0	1	0	10	57	36	14	5	0	0	0	0	0
35	1	24.1795	92	60	17	96	37.17	36	2.6	13.8462	29.5	110	8.7	21.2	132	4	1.8	22.8	171	46.8	2.1	33.4	44	108	2.9	195	0	1	3	1	0	0	0	1	1	0	0	1	0	14	61	27	15	4	1	0	1	1	1
59	2	35.3482	97	100	18	100	37.44	12	3.2	3.75	10.7	117	9.6	14.6	144	4.3	8.6	20.8	103	57.9	1.9	1.7	444	947	0.9	482.686	0	1	2	1	1	1	0	1	0	1	0	1	0	13	46	34	14	5	0	1	0	0	0
52	2	51.4533	94	85	15	98	36.11	19	3	6.33333	14.6	216	7	20.9	136	5.1	1.7	17.5	296	37.6	1.6	9.7	41	198	1	346	0	1	3	1	0	0	0	1	1	0	0	1	1	6	69	34	15	4	1	0	1	1	1
58	1	19.05	127	94	22	98	37.33	9	3.5	2.57143	5.4	71	6.1	19.4	139	3.1	3.21904	15	213	32.9	1.4	3.3	13	49	0.6	240	0	0	0	0	0	0	1	0	0	0	0	1	0	7	34	29	12	3	0	0	1	0	0
57	2	11.4796	82	72	16	100	36.78	29	2.4	12.0833	2.6	18	8.1	16.9	120	4.5	3.21904	25	204.822	29.9	2.3	3.6	13	41	1.1	147	1	1	3	1	0	0	0	0	0	0	0	1	0	8	60	26	15	4	0	0	1	1	1
49	1	27.2311	106	79	20	100	37.44	22	3.7	5.94595	22.7	75	8	18.9	135	4.3	4	22.3	186	35.7	2	4.8	127	222	1.1	260	0	1	3	0	0	1	0	0	0	0	0	1	0	10	56	29	15	5	0	0	0	0	0
45	2	27.3526	92	85	19	92	36.72	51	3.7	13.7838	14.3	93	9.1	16.7	107	4.2	1.2	61.2	124	78.4	5.8	19.5	82	245	3.9	605	1	1	3	1	0	0	0	1	1	0	0	1	1	12	81	32	13	3	0	0	1	1	1
75	1	22.8529	130	107	24	96	36.94	9	2.4	3.75	6.7	173	15	13.8	141	3.9	3.21904	13.6	204.822	29.4	1.3	0.6	31	61	0.9	274	0	1	3	1	1	0	0	0	0	0	1	0	0	2	39	46	13	6	0	0	0	0	0
64	1	29.9211	72	80	16	99	37.06	57	2.8	20.3571	10.9	104	8.1	18.1	140	4.1	1.4	15.6	198	33.7	1.4	2.9	523	686	1.6	380	0	1	3	0	0	0	0	0	0	0	0	1	0	10	54	30	15	8	0	0	1	0	0
55	1	21.0105	78	58	15	96	37.06	36	2.4	15	15.1	51	9.5	16.2	130	3.5	3.21904	26.2	204.822	49	2.4	13.3	26	43	0.9	87	0	1	1	1	0	0	0	0	0	0	0	1	0	12	62	26	15	4	0	0	0	0	0
65	2	35.2714	109	93	19	100	37.17	19	2.3	8.26087	6.4	54	10.1	15.2	135	4.6	1.1	17.7	199	34.8	1.6	3	326	474	0.7	482.686	1	1	2	1	1	0	0	0	0	0	0	1	0	10	42	32	15	5	0	1	0	1	1
43	1	30.6477	119	87	19	96	36	26	2.6	10	14.1	156	8.9	21.1	133	4.1	2	21.5	81	38.6	2	17	29	85	0.6	301	1	0	0	0	0	0	0	0	0	0	0	1	1	6	60	31	14	3	1	0	0	1	1
41	1	23.03	82	123	9	100	36.56	6	3.2	1.875	10.6	268	12.2	12.6	140	3.3	2.4	13.3	291	29	1.2	0.3	21	18	1	177	0	1	2	0	0	1	0	1	0	0	0	0	0	5	59	25	6	3	0	0	0	0	0
60	2	37.2024	76	91	19	97	36.72	10	2.4	4.16667	4.1	191	11	18	135	3.9	3.21904	14.2	204.822	31.3	1.3	2.2	19	64	1	271	0	1	2	1	1	1	0	0	0	0	0	0	1	2	34	24	14	8	0	0	0	1	0
70	2	36.1395	138	57	30	94	39.5	33	3	11	23.9	203	13.1	13.6	139	2.9	3	15.4	435	35.6	1.4	1.8	100	161	1.5	171	0	1	1	1	0	1	0	0	0	0	0	0	0	8	59	29	14	5	0	0	0	1	0
48	1	30.385	109	61	28	96	36.39	38	4	9.5	33.3	81	12.6	18.5	129	3.1	7.1	29.4	132	57.8	3	3.2	15	51	1.8	359	0	1	3	1	1	0	0	0	1	0	0	0	0	12	96	43	10	3	1	1	1	1	1
50	2	64.2361	117	51	22	94	36.44	60	4	15	5.3	65	10.5	14.7	130	4.5	2.2	16.7	204.822	37.3	1.6	8	148	418	5.7	902	0	1	3	0	0	0	1	0	0	0	0	0	1	10	78	34	15	5	0	0	0	0	0
68	1	28.6281	56	60	15	96	36.61	15	2.5	6	3.5	137	8	16.1	137	4.2	0.7	12.4	204.822	30.7	1.1	0.9	17	29	0.8	173	1	1	2	0	0	0	0	0	0	0	0	0	0	7	53	22	10	5	0	0	1	1	1
40	1	42.1875	93	53	15	97	36.83	16	1.9	8.42105	4.2	154	8.8	19.7	135	3.6	7	29.4	172	53	2.9	10.2	33	119	0.7	344	1	1	3	1	0	1	0	0	0	0	0	1	0	13	91	38	15	5	1	1	1	1	1
65	2	43.3893	94	106	18	96	37.06	14	2.6	5.38462	5.4	119	9.8	13.8	135	4.3	2.4	19.8	176	33.9	1.8	4.1	2465	3301	0.8	482.686	1	1	2	0	0	0	0	0	0	0	0	1	0	8	46	26	15	5	1	1	0	1	1
51	2	17.1001	146	99	20	100	36.72	17	3.5	4.85714	10	49	10.2	14.6	138	4.1	4.4	42.4	131	32.3	3.9	3.1	2893	9505	1.5	3165	0	1	2	1	0	0	0	1	0	0	0	1	0	11	43	38	14	2	1	1	1	0	0
55	1	29.0174	119	93	18	98	37.22	23	1.4	16.4286	13.6	77	8.5	16.9	131	4.1	1.4	18.5	167	36.4	1.7	4.4	317	964	1	394	0	1	3	1	1	0	0	0	0	0	0	1	0	9	78	46	13	4	0	0	1	0	0
72	2	30.2494	91	105	15	97	37.17	16	2.4	6.66667	4.9	62	8.8	15	134	5.2	1.7	17.4	204.822	32.7	1.6	0.8	12	22	0.9	482.686	0	1	2	0	1	1	0	0	1	0	0	1	0	6	35	37	15	5	0	0	1	0	0
60	2	31.5334	76	64	20	92	36.78	39	3.3	11.8182	15.2	63	7.3	16.3	143	4.4	3.21904	26.6	61	50.8	2.4	3.6	17	40	2.1	210	0	1	3	1	0	1	0	0	0	1	0	0	0	12	63	30	15	11	1	1	1	0	0
79	2	23.2072	58	120	13	98	36.78	11	2.4	4.58333	5.3	150	14.2	13.7	143	3.4	0.9	12.5	204.822	32.1	1.2	18	53	89	1.2	482.686	0	1	1	0	0	0	0	0	0	1	0	0	0	4	45	27	10	7	0	0	0	0	0
48	2	28.3987	86	74	35	99	37.06	10	3.4	2.94118	7	104	12	13.4	138	3.3	1.3	15.3	302	27.3	1.4	3.2	77	251	1	453	0	0	0	1	1	0	0	1	1	0	0	1	0	11	40	33	9	1	0	0	0	0	0
49	2	27.83	82	93	15	98	37.06	18	3.4	5.29412	5.6	45	9.5	16.1	138	4	1.5	16.4	204.822	29.7	1.5	6.5	42	121	0.9	247	1	1	1	0	0	1	0	1	0	1	0	1	0	11	26	32	14	4	0	0	0	1	1
54	2	28.0435	87	67	20	98	36.78	7	1.8	3.88889	19.7	149	7.2	15.9	140	3	2.4	20.1	234	51.7	1.8	0.7	23	56	0.4	283	0	1	1	1	0	0	1	0	1	0	0	1	0	8	46	35	15	6	0	0	0	1	0
71	2	27.2151	42	58	6	100	37.22	57	3.2	17.8125	8.9	81	14.1	16.6	135	4.4	2.5	49.2	152	148.4	4.5	2.3	216	448	2.2	1386	0	1	3	1	1	0	1	0	0	0	0	1	0	14	54	27	15	10	0	0	1	1	1
80	2	26.9274	50	65	10	97	36.72	28	4.1	6.82927	5.8	180	13.1	14.9	139	3.1	3.21904	14.5	176	30.2	1.4	0.9	6	19	1.7	126	1	1	3	1	0	0	0	0	0	0	0	1	1	4	50	33	13	6	0	0	1	1	1
59	1	17.4674	141	71	19	94	36.89	19	2.8	6.78571	10.6	21	8.5	17.8	131	4.3	4.6	22.7	180	38.4	2.1	7.4	19	56	0.8	229	0	1	3	1	0	0	0	1	0	0	0	1	0	11	72	41	13	6	1	1	1	1	0
75	2	52.4486	111	79	23	90	36.89	21	3.4	6.17647	22.9	216	10.4	18.8	140	4.5	1.3	40.9	428	36.5	3.8	4.4	37	92	1	197	0	1	3	1	0	1	0	1	0	0	1	0	0	8	54	41	14	9	1	0	1	1	1
28	1	32.2066	96	57	27	95	37	10	2.6	3.84615	21.8	205	8	24.1	137	4.2	3.5	27.2	205	43.9	2.5	3.4	42	145	0.7	414	0	1	2	1	0	0	0	0	0	0	0	1	0	6	38	17	15	2	0	0	0	0	0
59	2	23.03	91	84	15	100	35.83	15	2.4	6.25	14	55	5.8	14	139	4.2	7.2	18.7	210	53.6	1.7	6.2	1386	1818	0.9	482.686	1	1	2	1	0	1	0	0	0	0	0	1	0	13	69	36	11	7	1	1	1	1	1
69	1	34.687	130	98	6	100	37.39	8	4	2	13.7	181	6.8	18.6	143	3.3	6.5	19.5	209	33	1.8	1.7	15	49	1.4	244	0	1	3	1	1	1	0	1	0	1	0	1	0	9	43	32	15	7	0	0	1	1	1
57	2	39.0591	88	91	17	95	36.5	48	4	12	3.5	40	8.3	22.8	137	2.6	2	26.9	141	49	2.5	44.2	32	101	5.1	418	0	1	3	1	0	0	0	0	0	0	0	1	1	13	80	34	14	4	0	0	1	1	1
53	1	27.3536	98	65	16	100	37.44	16	2.4	6.66667	5.7	85	9.6	15.7	144	4.1	1.8	14.2	399	34.8	1.3	0.7	40	43	0.8	157	1	1	2	1	1	1	0	1	0	1	0	0	0	4	17	37	15	5	0	0	1	1	1
66	2	26.7857	116	85	22	96	37.5	9	2.5	3.6	16.6	183	7	24.4	130	3.9	1.2	16.4	320	26	1.5	0.8	35	55	0.5	482.686	0	1	1	0	1	0	0	1	0	0	0	1	0	0	28	28	15	6	0	0	0	0	0
62	2	26.4427	76	91	12	100	36.78	15	3.3	4.54545	12.4	97	9.8	20.7	142	4.3	11.9	25.9	144	33.1	2.4	8.8	33	67	1	300	0	1	2	1	1	0	0	0	0	0	0	1	0	14	77	57	4	6	1	0	0	0	0
71	1	23.3135	74	78	17	100	36.33	5	2.8	1.78571	13.9	168	8.1	16.6	141	3.8	3.21904	14.1	204.822	34.7	1.3	0.5	8	21	0.4	482.686	1	1	1	0	0	0	0	0	0	0	0	0	0	1	34	20	15	13	0	0	1	1	1
72	2	30.3085	54	87	16	100	36.5	10	2.4	4.16667	3.5	118	9.9	13.4	141	4.1	1.4	14.1	227	27.8	1.3	18	53	89	0.9	482.686	0	1	3	1	1	0	0	0	1	0	0	1	0	4	61	37	15	7	0	0	1	1	1
57	2	32.7637	129	119	23	99	36.83	12	2.4	5	13.4	102	8.6	13.6	140	4.9	6.4	18.8	155	39.3	1.7	1.9	1115	1080	0.8	941	1	1	1	1	1	0	0	1	0	0	0	1	0	11	60	43	7	6	1	1	0	1	1
64	2	31.25	97	81	16	97	37	9	2.4	3.75	7.1	54	5.8	16.3	143	4	3.21904	25	88	47.2	2.3	6.5	34	77	0.6	482.686	0	1	2	0	1	0	0	1	0	0	0	1	0	7	40	31	15	5	1	1	0	0	0
65	2	28.6281	95	92	18	98	37	24	2.1	11.4286	15.9	165	7.4	15.8	126	4.5	1.5	14.9	333	29.6	1.4	1.1	426	247	0.7	329	0	0	0	1	1	0	0	0	0	0	0	1	0	2	41	27	14	12	0	0	0	1	0
57	1	24.4646	0	116	0	80	36.5	16	2.4	6.66667	11.8	110	9.6	15.9	139	3.2	3.5	14.2	204.822	30.5	1.3	0.8	17	116	1.6	231	0	1	3	0	0	0	0	0	0	0	0	1	0	9	52	43	15	6	0	0	1	1	1
51	2	28.1675	87	71	22	95	36.94	70	2.4	29.1667	11.7	125	12.6	15.5	130	5.4	3.3	24.9	204.822	77.9	2.3	7.4	21	44	4.1	195	0	1	3	1	1	1	0	0	1	0	0	1	0	11	64	28	14	11	1	0	1	1	1
56	2	31.8878	96	80	22	97	36.61	11	2.6	4.23077	16.5	66	9.8	17.7	139	3.4	4.3	19	204.822	37.1	1.7	3.5	30	51	0.9	226	0	0	0	1	1	1	0	0	0	1	0	1	0	9	29	22	15	5	0	0	1	0	0
60	2	17.2902	89	127	30	100	36.33	32	2.4	13.3333	18.6	120	13.2	15.9	135	4.2	3.1	22.4	139	50.8	2.1	3.1	26	55	0.9	482.686	0	0	0	0	1	0	0	0	1	0	0	1	0	5	47	35	15	4	0	0	1	1	1
69	1	32.839	91	88	14	100	36.5	25	1.8	13.8889	8.1	197	10.9	25.2	138	3.8	2.6	17.7	204.822	36.6	1.6	0.9	14	35	1.1	316	0	1	3	1	1	0	1	1	0	1	0	1	0	7	58	35	8	6	0	0	1	1	1
58	2	25.698	95	84	20	100	36.94	87	2.6	33.4615	8.2	83	9.8	19.2	132	5.2	1.1	24.3	336	28.6	2.2	2.8	11	25	5	271	0	1	3	1	0	1	1	0	0	1	0	1	0	10	64	36	13	9	0	0	1	1	1
62	1	38.2934	107	70	22	100	36.61	14	3	4.66667	7.3	91	6.8	24	138	4	21	25.8	113	55.7	2.4	6.2	33	69	2	328	1	1	3	1	0	0	0	1	0	0	0	1	0	12	102	49	15	7	0	0	1	1	1
75	2	28.947	86	61	36	90	36.67	44	2.8	15.7143	5.6	141	9.9	18.2	140	4.8	3.21904	17	390	33.2	1.5	1.5	9	69	3.7	354	0	1	3	1	0	0	1	0	0	0	0	0	0	7	62	42	14	9	0	0	1	0	0
65	2	35.856	100	65	19	95	36.78	44	2.4	18.3333	18.7	240	11.2	15.8	135	4	2.5	14.1	204.822	34.4	1.3	0.2	27	53	2.7	482.686	0	1	3	0	0	1	0	0	0	1	0	0	0	3	42	21	15	12	0	0	1	1	1
62	2	29.9391	64	85	17	100	37	8	2.5	3.2	6.6	81	10.1	21	137	4	4.1	30.4	204.822	57.9	2.8	4	28	68	0.7	449	1	1	3	1	1	1	0	0	1	0	0	1	0	15	92	34	3	6	0	0	1	1	1
65	2	27.8132	119	98	18	97	37.94	7	1.8	3.88889	5.4	61	9.1	20	132	3.7	3.21904	17.8	106	46.4	1.6	3.2	33	113	0.8	288	0	1	3	1	0	0	0	0	1	0	0	1	1	4	41	29	15	6	0	0	1	0	0
64	1	26.9605	82	97	16	98	37.56	35	2.6	13.4615	4.8	51	10.9	16.8	144	4.3	2.6	15.4	146	26.9	1.4	1.2	34	44	0.8	210	1	1	1	1	0	0	0	0	0	0	0	0	0	8	41	43	13	5	0	1	1	1	1
70	2	25.7228	94	72	17	94	36.83	65	3.8	17.1053	11.8	53	9.5	17.6	127	4.1	6.4	34.5	120	60.9	3.1	13	2353	1971	2	657	1	1	3	0	0	1	0	0	0	1	0	0	0	12	69	28	14	13	0	0	1	1	1
63	2	19.827	88	78	12	100	37.11	14	2.4	5.83333	13.3	134	8.2	14.6	139	3.9	2.4	17.7	282	35.2	1.6	18	53	89	3.8	482.686	0	1	3	0	0	0	1	0	1	0	0	0	0	15	92	47	3	7	0	0	1	0	0
67	2	29.1596	64	98	22	98	36.67	12	2.7	4.44444	13.3	90	9.2	20.9	138	3.5	2.2	19.7	130	30.7	1.8	3.1	306	478	0.7	254	0	1	2	1	1	0	0	1	0	0	0	0	0	8	39	20	15	7	0	1	0	0	0
41	1	26.5347	109	67	19	100	36.44	22	2.1	10.4762	8.9	56	7	16	126	5.1	3.9	14.1	204.822	27.2	1.3	1.6	32	121	1	482.686	1	1	2	1	0	0	0	0	0	0	0	1	0	6	60	37	14	3	0	0	1	1	1
49	1	34.0379	131	86	17	100	36.78	68	1.5	45.3333	38.5	63	6.1	17.1	133	4.4	3.8	20.8	124	45	1.9	2.2	24	35	1.9	311	0	1	3	1	1	1	0	1	1	1	0	0	0	18	129	51	8	6	0	1	1	1	1
56	2	18.6189	101	46	20	97	36.56	130	3.8	34.2105	6.5	29	6.1	19.9	127	4.3	4.5	31.2	122	58.1	2.8	9.4	20	59	1.9	121	1	1	2	1	0	1	0	1	0	0	0	1	0	11	68	37	14	8	0	0	1	1	1
50	1	19.6287	106	52	11	96	36.39	48	2.1	22.8571	18.6	80	10	18.8	133	4	2.4	18.8	204.822	53.2	1.7	6.7	46	87	1.9	382	0	0	0	1	0	0	0	0	0	0	0	0	0	9	79	26	13	9	1	0	1	1	1
54	1	30.0099	122	99	21	94	37.56	11	3.4	3.23529	4.9	52	10.9	17.1	142	3.3	1.2	16.7	161	32.7	1.6	7.6	27	99	0.5	461	1	1	2	1	1	0	0	1	0	0	0	0	1	9	47	37	10	4	0	0	1	1	1
56	2	25.6055	94	83	18	100	37.61	18	3.4	5.29412	7.6	115	7.8	15.3	140	5.3	6.1	22	174	25.1	2	4.1	15	28	0.6	128	1	1	1	1	1	1	0	0	0	1	0	1	0	6	46	27	14	5	1	1	1	1	1
77	2	30.5414	77	70	21	100	36.5	84	3.4	24.7059	3.8	91	7.2	15.9	134	3.7	1.4	17.3	238	40.9	1.6	1.1	95	108	1.3	224	0	1	1	0	0	0	1	0	0	0	0	0	0	5	47	30	15	8	0	0	0	1	0
50	1	19.0311	107	82	15	94	36.67	28	2.6	10.7692	17.4	311	7.5	14.9	114	3	3.5	24.1	247	34.7	2.2	9.9	120	365	0.9	735	0	1	3	1	0	0	0	1	1	0	0	1	0	5	70	29	13	4	0	0	1	1	1
44	1	29.5848	118	106	35	99	36.78	71	2.3	30.8696	16.7	214	8.4	14.6	141	4.1	1.4	14.8	398	27.5	1.4	0.4	12	21	11.2	377	0	1	3	1	0	1	1	0	0	0	0	0	0	4	71	42	15	6	0	0	0	0	0
36	2	29.2929	94	106	20	100	37.5	17	3	5.66667	9.2	79	9.8	14.6	144	3.4	3.8	16.2	145	36.6	1.5	2.6	327	498	1	417	1	1	2	1	0	0	0	0	0	0	0	0	0	10	44	31	15	3	0	1	0	1	1
66	1	24.8724	130	95	18	96	36.94	18	3.1	5.80645	7.6	200	8.4	22.8	135	4.2	1.8	28.2	204.822	39.2	2.6	0.5	9	15	1.8	133	0	1	1	1	1	1	0	1	0	1	0	0	0	5	63	35	11	7	0	0	0	1	0
55	2	27.9904	77	101	14	97	37.11	18	2.8	6.42857	10.3	112	13	14.4	137	4.4	1.5	30	160	41.6	2.7	1.4	734	1632	1	1477	1	1	2	1	1	0	0	1	0	0	0	0	0	8	48	27	14	7	0	0	0	1	1
54	2	25.1382	74	65	24	100	35.94	47	1.7	27.6471	18.6	29	10.6	14.1	131	3.4	1.3	15.1	204.822	31.8	1.4	1.2	52	49	1.2	268	0	1	1	1	0	0	0	0	0	0	1	1	0	6	60	36	15	12	0	1	1	0	0
57	2	26.1962	110	71	31	95	36.94	13	2	6.5	28	266	10.9	15.2	135	3.3	2.1	26	204.822	44.7	2.4	17.1	75	160	0.4	482.686	1	1	3	1	0	0	0	1	1	0	0	0	1	8	74	49	14	4	1	0	1	1	1
57	2	25.5102	82	76	16	99	36.17	34	2.3	14.7826	6.4	129	7.4	17.9	131	4.2	3.21904	18.6	204.822	33.5	1.7	27.6	96	112	1	128	0	0	0	1	0	1	0	0	0	0	0	1	0	6	57	18	15	12	0	0	0	1	0
71	2	34.0136	150	78	20	100	37.28	22	2.8	7.85714	3.3	37	8.3	13.5	135	4.1	1.5	17.6	300	33.2	1.6	2.6	20	37	1.2	182	1	0	0	1	0	1	0	1	0	0	0	1	0	9	62	38	15	10	0	0	1	1	1
64	2	51.4233	80	69	28	91	37.61	62	3.6	17.2222	5.4	118	9.9	17.2	141	3.9	3.21904	21.6	204.822	145.2	2.1	1.9	12	20	2.2	482.686	0	1	2	1	0	1	1	0	0	0	0	1	0	4	22	17	12	8	0	0	1	0	0
56	2	27.0709	143	90	18	99	37.78	62	3.1	20	12.7	117	12.8	16.9	135	4.4	1.2	17.8	213	36.5	1.6	5	445	833	3.3	255	0	1	2	1	0	0	0	0	0	0	0	0	0	8	56	36	14	7	0	1	1	0	0
73	2	32.2087	91	91	54	99	36.89	38	1.9	20	6.3	32	7.7	15.9	141	5.9	3.3	21.6	85	38.8	2	4.2	33	81	3.2	513	0	1	3	1	0	0	0	1	0	0	0	1	0	11	82	39	15	8	0	1	1	0	0
52	2	33.8365	83	71	15	90	36.72	11	2.3	4.78261	6.4	58	7.6	19.9	138	4.5	2	18.6	118	42.5	1.7	6	25	80	0.7	259	1	0	0	1	1	0	0	1	0	1	0	1	0	9	44	18	15	6	1	1	1	1	1
71	1	26.2255	78	93	21	95	36.61	55	3.1	17.7419	2.9	60	7.3	15.9	136	4.4	1.3	15.4	180	33.5	1.4	1.2	10	31	5.1	191	1	1	3	1	0	1	0	0	0	0	0	1	0	17	91	46	4	10	0	1	0	1	1
54	2	27.5298	103	87	21	97	36.56	38	4.2	9.04762	9.1	51	10.6	20.8	132	6.5	2.1	16.6	152	33.8	1.6	19.7	88	91	1.1	380	1	0	0	1	0	0	0	0	0	0	0	1	0	8	36	31	15	4	0	0	0	1	1
36	1	20.4245	61	81	12	94	36.44	20	2.4	8.33333	9.4	188	12.3	14.5	135	4	3.21904	19.1	204.822	52.5	1.7	2.1	12	33	0.8	264	0	0	0	0	0	0	1	0	0	0	0	0	0	3	43	19	15	2	0	0	0	0	0
68	1	21.0105	112	83	27	94	37	19	2.4	7.91667	9.5	190	6.8	19.9	147	3.6	3.3	16.2	181	35.7	1.5	0.5	20	32	0.8	304	0	0	0	0	0	0	0	0	0	0	0	1	0	0	25	31	15	7	0	0	1	1	0
60	2	18.4775	90	83	24	100	37.17	17	2.3	7.3913	26.5	312	9.3	18.4	133	4.6	4.3	16.1	204.822	25.6	1.5	0.2	11	14	0.4	119	0	1	1	1	0	0	1	0	0	0	0	1	0	5	53	38	15	5	0	0	1	0	0
58	2	27.1755	98	99	22	100	37.28	13	3.2	4.0625	3.7	63	7.2	13.7	145	2.3	2	14.6	204.822	28.6	1.4	1.5	25	56	0.6	226	1	1	2	1	0	0	0	0	1	0	0	0	1	5	28	37	15	6	1	1	0	1	1
58	2	27.4589	57	100	12	97	36.56	58	3	19.3333	3.3	70	10.3	15.2	122	6.2	3.21904	8.9	204.822	26.9	0.8	1.4	74	80	1.5	482.686	0	1	1	0	0	0	0	0	0	0	0	0	0	6	53	31	14	3	0	0	1	0	0
62	2	30.8603	78	78	17	97	37.11	11	3.8	2.89474	3.7	38	9	17.2	136	4.2	3.21904	16.2	204.822	28.1	1.5	3.2	10	21	0.8	204	0	0	0	0	0	1	0	1	0	0	0	0	0	3	25	25	15	7	0	1	0	1	0
51	1	22.3047	87	136	12	100	37.28	39	2.3	16.9565	18.8	114	6.8	15.7	138	4.5	3.1	22.1	164	32.1	2	1.8	139	493	0.8	400	1	0	0	1	0	0	0	1	1	0	0	1	0	7	59	26	10	4	1	0	0	1	1
59	1	16.2273	94	64	20	100	36.5	59	3.2	18.4375	14.9	166	13.4	15.7	136	6.4	2.2	19.3	204.822	39.3	1.8	1.4	1042	1816	1.5	2115	0	1	1	1	0	0	0	0	0	0	0	0	0	11	50	33	15	3	0	0	1	0	0
55	2	24.8016	71	52	18	100	35.83	7	3.1	2.25806	8.4	105	10.8	17.3	133	3.1	2.7	14.9	261	33	1.3	3.6	16	46	0.7	165	0	0	0	1	0	0	1	0	1	0	0	1	0	8	53	37	8	7	0	1	1	1	1
60	2	50.2055	65	77	17	94	36.78	51	1.9	26.8421	2.9	28	10	17.2	137	4.8	2.3	17	204.822	47.1	1.6	1.1	16	41	1.5	267	1	1	2	1	1	1	0	1	0	1	0	0	0	8	61	23	15	11	0	1	1	1	1
67	2	21.0832	140	131	28	94	38.06	7	2.4	2.91667	21.3	316	10.4	17.9	136	4.1	2	12	204.822	31.9	1.1	0.3	5	25	0.9	482.686	0	0	0	0	1	0	1	1	1	0	0	0	0	8	52	41	15	4	0	0	1	0	0
53	2	23.6735	113	55	16	98	36.5	13	2.4	5.41667	4.9	51	9.7	19.9	138	3.2	4	25.2	136	38.5	2.3	7.8	37	158	1.2	364	1	1	2	1	0	0	0	0	0	0	0	1	0	14	67	42	15	5	1	1	1	1	1
48	1	27.3278	84	51	14	100	36.39	10	2.4	4.16667	33.6	202	11.1	26.3	139	4.4	3.6	14.5	204.822	37.7	1.3	18	53	89	0.6	482.686	0	1	2	1	0	0	0	0	0	0	0	0	0	5	90	43	3	8	0	0	1	1	1
61	2	28.6281	117	86	26	97	37.61	27	2.7	10	8.8	311	10.5	17	134	4.8	2.3	14.2	204.822	36.1	1.2	2.6	50	59	1.2	206	1	1	2	0	1	0	0	0	0	0	0	1	0	4	65	32	15	7	0	0	1	1	1
51	1	23.467	124	93	35	92	36.78	11	3.8	2.89474	16.1	333	7.7	18.5	146	3.2	1.5	22.8	198	37.7	2.2	1.3	15	40	0.5	241	0	0	0	0	0	0	0	0	0	0	0	1	0	4	51	33	13	2	0	0	0	1	0
37	1	24.5536	114	100	25	99	37.17	6	2.4	2.5	8.4	124	7.8	18	139	4.2	1.6	15.8	204.822	34.6	1.4	1	81	139	0.5	482.686	1	0	0	0	0	0	0	1	0	0	0	1	0	3	31	20	14	4	0	0	0	1	1
55	1	39.0625	71	68	17	99	35.78	59	2.5	23.6	7.3	70	9.9	18.3	147	3.4	2.9	17.3	254	39.6	1.6	8.9	81	176	1.4	297	0	1	3	0	0	0	0	0	0	1	0	0	1	7	62	40	15	12	0	1	0	1	0
67	2	30.7125	85	67	18	95	36.44	24	2.5	9.6	10.5	158	7.8	14.7	140	3.9	1.4	27.5	308	34.8	2.6	0.9	10	27	1.2	310	0	1	2	0	0	0	0	0	1	0	0	0	0	8	41	24	15	5	0	0	0	0	0
59	1	24.8016	72	106	14	95	36.67	13	4.3	3.02326	5.6	74	10.3	14.6	141	6	3.1	11.5	204.822	32.2	1.1	1.1	80	289	0.5	482.686	0	1	2	1	0	0	0	1	0	0	0	0	0	6	37	23	9	2	0	1	1	1	1
76	2	22.8135	119	89	18	94	36.33	58	3.5	16.5714	2.9	71	8.3	15.9	141	5.2	4.1	15.3	204.822	29.3	1.4	1.1	14	25	3	148	0	1	3	1	0	1	0	0	1	1	0	1	0	11	78	39	15	8	0	0	1	1	1
57	1	50.6714	97	77	24	90	37	18	3.4	5.29412	5.8	26	8.9	14.6	129	3.5	2.3	41.8	97	64	3.8	10.1	37	89	1	534	1	1	3	1	1	0	0	1	1	0	0	0	0	14	66	33	15	5	1	1	1	1	1
48	1	25.9708	94	71	21	82	37.11	26	2.6	10	12.8	58	8.7	27.4	122	8.7	2.2	22.6	170	43.9	2	22.5	39	147	2	557	1	1	1	1	1	0	0	1	1	0	0	1	0	9	55	21	15	3	0	0	1	1	1
61	2	36.9898	77	60	20	96	36.61	6	3.8	1.57895	8.3	169	15	13.4	134	5.4	3.21904	12.9	204.822	22.5	1.1	0.7	9	20	0.8	482.686	0	1	1	0	0	0	0	0	0	0	0	0	0	3	33	26	12	3	0	0	0	0	0
53	2	41.5781	103	98	17	99	37.28	26	1.9	13.6842	21.7	77	9	16	140	4.4	1.5	23	137	72.1	2.2	2.4	1444	2025	0.9	3050	0	1	2	1	0	0	0	0	0	0	0	0	0	10	105	44	3	6	1	1	0	0	0
80	1	21.6713	79	81	18	91	36.78	46	3.2	14.375	13.5	257	13.2	21.3	145	3.9	1.3	17.3	204.822	48.3	1.5	0.7	22	19	1.6	210	0	1	1	1	0	0	1	0	1	0	0	0	0	3	36	24	15	9	0	0	1	0	0
71	2	59.6412	77	123	18	96	36.94	23	2.4	9.58333	6.6	118	9	15.4	138	5.2	1.4	12.8	204.822	29.8	1.2	0.5	21	34	1.4	482.686	0	1	3	1	1	1	0	0	0	1	0	0	1	7	52	32	13	8	0	0	0	0	0
58	2	21.6016	107	155	25	100	37.28	14	2.9	4.82759	3.9	31	4.8	22.9	129	4.7	5	37.9	204.822	58.8	3.5	25.4	97	234	0.4	300	1	1	3	1	0	0	1	1	0	1	0	1	0	16	103	47	3	5	0	0	1	1	1
33	1	33.8365	98	102	21	95	36.83	22	3.2	6.875	15.7	55	7.5	23.4	135	3.6	2.5	54.7	77	90	4.9	26	19	102	1.4	200	0	1	3	1	0	0	0	1	1	0	0	1	0	18	117	46	15	1	1	1	1	1	1
49	2	52.5794	98	90	29	96	37.67	9	3.5	2.57143	6.1	82	12.6	14	136	3.2	1.1	13.4	204.822	29	1.2	3.5	17	45	0.5	482.686	0	1	2	0	1	0	0	0	0	1	0	1	0	8	49	32	10	1	0	0	0	0	0
67	2	22.0932	102	112	19	92	34.89	17	2	8.5	17.4	117	11.1	23.2	144	3.2	2	20.7	39	48.2	2	3.4	26	32	3.1	402	0	1	3	1	0	0	0	0	1	0	0	0	1	13	71	32	15	7	1	0	1	1	1
48	2	38.0828	88	97	16	100	37.72	22	3	7.33333	7	61	10.7	17.1	133	5.2	1.5	20.7	119	34.5	1.9	6.6	404	597	1.2	212	0	1	3	1	0	0	0	0	0	0	0	1	0	10	56	38	15	3	1	1	1	0	0
50	2	30.7283	74	82	16	94	36.94	22	3	7.33333	10.5	45	6.9	27	137	4.6	3.21904	14.5	235	27.9	1.3	7.7	20	69	0.4	1386	1	1	2	0	1	1	0	0	0	0	0	0	0	8	39	22	14	5	0	0	1	1	1
57	2	28.5494	86	70	18	100	37.28	37	3.2	11.5625	13.2	216	10.2	18.7	141	3.8	1.9	23.1	204.822	29.7	2.1	1.4	298	654	1.5	277	0	1	1	1	0	1	1	1	1	0	1	0	0	7	45	42	10	5	0	0	1	0	0
65	2	23.2315	132	76	33	96	36	21	2.1	10	9.7	138	10.9	19.3	140	3.5	2.5	18	123	31.5	1.6	2	23	27	1	284	0	1	3	1	1	0	0	0	1	1	0	0	0	4	62	40	13	3	0	0	1	1	0
58	2	31.8878	57	108	20	98	36.72	19	2.7	7.03704	20.8	451	11.3	14.6	139	4.8	3.21904	17.6	411	33.2	1.6	0.7	117	106	1	330	1	1	3	0	0	0	0	0	0	0	1	1	0	0	23	22	15	6	0	0	0	1	1
75	1	31.8169	123	68	26	97	37.39	13	2.4	5.41667	9.1	109	11.5	14.9	135	3.2	3.21904	14	204.822	27.4	1.3	0.7	16	28	0.8	228	0	1	2	1	0	1	1	0	1	0	0	1	0	5	38	39	14	6	0	0	1	0	0
50	2	32.4546	130	84	21	93	37.5	10	3.9	2.5641	12.2	104	7.6	16.2	135	3.8	2.2	29.1	131	60.2	2.6	6.7	26	62	0.7	336	1	0	0	1	0	0	0	0	0	0	0	1	0	6	45	31	14	4	0	0	0	1	1
43	1	25.3444	113	75	16	100	36.78	45	2.6	17.3077	7.3	117	9	17.4	140	5.9	1.9	16.8	117	24.7	1.5	1.6	19	30	1.2	203	1	1	1	1	0	0	0	0	0	0	0	1	0	10	49	34	15	3	1	1	1	1	1
74	1	34.1016	92	81	20	100	37.72	30	2.3	13.0435	22	315	7.7	17	137	4.1	8.3	12.9	414	24.5	1.2	1.2	133	472	0.8	468	0	1	3	1	1	1	0	0	1	1	0	0	0	5	48	35	15	12	0	0	1	1	1
35	2	26.9494	92	93	17	99	38.39	23	3	7.66667	8.3	165	12.2	17.5	136	5.1	4.4	24	125	56.7	2.3	13.2	259	623	1.2	482.686	0	1	2	0	0	0	0	0	0	0	0	1	0	9	49	20	15	1	0	1	0	0	0
63	2	32.6821	89	70	16	98	38.06	15	3.5	4.28571	13.4	134	10.9	13.3	143	4	4.1	14.9	164	30.9	1.4	1.7	380	580	1.4	386	0	1	2	1	0	0	0	0	0	1	0	0	0	12	39	31	15	8	1	1	0	0	0
55	2	33.9903	108	78	20	97	37	81	2.7	30	11.1	74	7.3	18.2	134	3.4	2.9	19.5	204.822	34.7	1.8	24.5	87	440	2.7	225	1	1	2	1	0	0	0	1	1	0	0	1	0	10	86	39	14	4	0	0	1	1	1
66	1	32.4619	126	72	18	99	36.06	31	2.6	11.9231	4	137	8.5	17.5	136	3.6	4.6	14	204.822	27.3	1.3	2	18	28	1.5	187	1	1	2	1	0	1	0	1	0	0	0	1	0	12	77	50	9	10	0	0	0	1	1
59	2	31.9586	118	76	19	98	37.22	37	3.4	10.8824	10.9	67	6.3	16.1	140	3.4	3.9	25.2	110	28.2	2.3	7.4	35	92	0.8	326	1	1	2	1	1	0	0	1	0	0	0	1	0	11	44	39	14	4	1	1	0	1	1
65	1	36.2891	82	67	22	100	36.56	33	2.7	12.2222	9.5	42	8.5	17.1	130	5.7	7.3	20.5	157	37.5	1.9	2.1	64	177	1.6	624	0	1	2	1	0	1	1	1	1	0	1	0	0	10	73	43	15	9	0	0	1	1	0
48	2	36.7851	107	159	18	100	37.72	7	2.4	2.91667	8.8	81	12.1	16.2	135	3.9	3.6	14.9	204.822	46.8	1.4	4.4	64	140	0.8	482.686	0	1	3	1	0	0	0	0	1	0	0	0	0	5	45	36	15	3	0	0	1	1	1
54	2	30.8731	70	67	18	100	36.94	19	2.3	8.26087	6.6	69	9	18.1	138	4.2	0.9	13.2	513	29.6	1.2	2	13	21	0.8	357	0	1	2	1	0	0	0	0	1	0	0	0	0	6	39	35	15	2	0	0	0	0	0
47	2	22.8822	132	93	20	99	37.83	13	2.9	4.48276	17.6	76	7	16.5	147	3.9	4.1	16	215	38	1.5	2.4	611	1400	0.6	1945	0	0	0	1	0	0	0	0	0	0	0	1	0	11	93	29	3	3	1	1	0	0	0
76	2	37.551	96	59	22	97	36.61	99	2.2	45	25.9	270	13.1	15.8	132	4.1	3.3	30.1	204.822	88.8	2.8	17.1	194	227	5.3	497	0	1	3	1	0	0	0	0	0	0	0	0	0	15	110	43	15	7	1	0	1	1	1
70	2	33.7656	77	77	19	99	36.78	84	2.9	28.9655	6.1	46	9.7	21.7	132	5.3	1.4	25.9	204.822	44.1	2.3	10.5	209	252	3.1	401	0	1	3	1	0	1	0	1	0	0	0	1	0	9	71	30	15	8	0	0	0	1	0
66	1	25.3906	75	71	25	96	37.06	23	2.4	9.58333	9.8	59	10.1	17.8	118	4.3	1	17.7	204.822	31	1.6	12.3	131	216	0.8	321	1	1	3	1	0	0	0	1	0	0	0	1	0	7	61	25	15	5	0	0	0	1	1
49	2	34.7178	86	63	15	100	34.83	33	3.6	9.16667	12.4	121	14.3	14.9	138	4.5	2.4	18.2	204.822	37.6	1.6	1.9	50	109	2	243	0	1	3	1	0	0	1	0	0	0	0	1	0	12	65	38	15	4	0	0	1	1	1
35	2	34.0245	95	81	22	97	35.94	30	3.4	8.82353	11.6	158	7.2	14.4	136	5.7	1.4	23.5	154	49.2	2.2	2.7	9	23	2.3	145	1	1	3	1	0	0	0	0	1	0	0	1	0	7	42	34	15	5	0	0	0	1	1
67	2	25.193	69	85	43	99	36.72	7	2.4	2.91667	7.6	58	12.8	14.1	142	3.5	1.9	19.7	171	39.8	1.8	2.7	53	89	0.7	200	0	1	2	1	1	0	0	0	1	0	0	0	0	6	30	33	15	4	1	1	1	1	1
69	1	26.8359	89	68	21	96	36.67	75	2.7	27.7778	11.2	82	7.7	24.4	139	5	2.4	52.3	96	150	4.8	5.8	382	878	5.2	500	1	1	3	1	1	1	0	1	0	1	0	1	0	11	65	28	13	6	0	0	1	1	1
63	2	28.8	69	67	22	95	36.39	23	2.4	9.58333	23.1	151	10.7	13.2	134	4.4	2.4	14.2	204.822	39	1.3	0.7	14	36	0.7	135	0	0	0	1	1	0	0	0	1	1	0	0	0	5	39	33	15	3	0	0	1	0	0
62	2	40.0368	86	99	13	95	37.22	14	3	4.66667	14.9	68	14.7	14	136	4.2	0.9	15.4	356	150	1.4	1	24	29	0.9	738	0	1	3	1	1	0	0	1	0	0	0	1	0	2	30	29	15	7	0	0	1	0	0
73	2	29.5848	80	94	20	100	36.5	9	3.7	2.43243	12	90	8.3	18.2	111	4.7	1.8	13.6	281	28.4	1.2	2.7	32	47	0.9	223	0	1	2	1	0	0	1	0	0	0	1	1	0	5	30	27	15	8	0	0	0	0	0
45	2	28.4055	104	76	20	96	36.67	59	2.4	24.5833	15.4	277	8.2	16.1	138	4	1.5	17.4	204.822	31	1.6	4.7	131	77	2	186	0	1	3	1	1	1	1	0	0	1	0	0	0	8	88	27	9	3	0	0	0	1	0
59	2	25.4039	125	120	29	100	36.44	31	3.5	8.85714	5.9	62	10.6	16.3	130	4.3	2.7	23	102	31.5	2.1	1.6	1773	3559	0.9	431	0	0	0	1	1	0	0	1	0	0	0	1	0	9	51	43	13	4	1	1	1	0	0
77	2	28.5767	67	78	19	100	36.56	47	2.4	19.5833	7.1	167	7.3	15.8	137	4.7	4.5	12.6	328	29.2	1.2	1.9	40	234	1.2	311	1	0	0	1	0	1	0	1	1	1	0	1	0	3	34	34	15	14	0	0	1	1	1
56	2	23.9869	81	79	17	100	36.39	11	2.4	4.58333	7	57	10.8	14.4	136	4.3	1.3	16.8	228	31.2	1.6	2.4	33	58	0.5	482.686	0	1	2	1	1	1	0	0	1	0	0	0	0	7	46	39	15	7	0	1	0	0	0
65	1	19.1327	73	98	13	94	36.44	17	2.4	7.08333	9.9	83	11.5	13.4	135	4.3	2.7	15.3	204.822	31.4	1.4	0.7	16	30	0.6	482.686	0	0	0	0	1	1	0	1	0	0	0	0	0	6	47	26	10	10	0	0	0	0	0
32	2	37.2378	109	69	33	98	36.78	14	2.3	6.08696	2.2	39	10.3	19.1	136	3.9	6.1	67.3	127	118.1	6.3	11	30	114	1.6	341	1	1	3	1	0	0	0	0	0	0	0	1	0	17	125	47	15	3	1	1	1	1	1
52	2	41.0998	90	101	20	95	36.72	54	2.4	22.5	10.3	104	9.6	13.5	105	4.3	1.8	11.6	204.822	35.5	1.1	0.4	36	48	2.1	278	0	1	2	0	1	0	0	0	0	1	0	0	0	5	44	24	14	2	0	0	1	0	0
60	1	29.7265	68	127	11	100	34.44	15	3.3	4.54545	4.1	61	9.2	14.5	145	3.9	1.3	17.1	150	42.3	1.6	4.9	59	62	0.5	134	0	0	0	0	1	1	0	0	0	0	0	0	0	6	47	41	14	12	0	1	1	0	0
74	2	30.5768	74	60	25	98	36.22	116	3.5	33.1429	5.7	153	6.1	17.7	139	4.7	3	24.5	169	50.4	2.3	5.3	44	74	4.2	308	1	1	1	1	0	0	1	0	0	1	1	1	0	9	57	28	15	11	0	0	1	1	1
79	2	29.4076	88	54	40	98	35.83	73	2.8	26.0714	18.5	76	5.4	21.7	139	5.6	14.6	24.4	71	62.1	2.3	3.2	43	181	1.7	1530	1	1	3	1	1	1	1	0	0	0	0	1	0	15	102	53	15	11	1	1	1	1	1
61	2	27.1605	102	122	16	100	37.83	19	3	6.33333	8	83	7.5	12.9	141	4.4	2.6	19.8	154	38.5	1.8	1.5	926	1209	1	697	1	1	1	1	1	0	0	1	0	1	1	0	0	16	69	39	6	8	1	1	1	1	1
72	1	33.3759	67	100	14	97	36.89	16	2.7	5.92593	4.4	95	13.7	14.1	141	4.6	2.9	18.1	222	31.9	1.7	3.5	22	35	1.1	370	0	1	3	0	1	1	0	0	0	1	0	1	0	6	46	33	12	10	1	1	1	1	1
54	2	27.7323	81	61	24	96	36	97	2.6	37.3077	12.3	206	9.5	16.6	129	3.2	3.21904	20.9	204.822	108.7	1.9	25.5	165	294	7	179	0	1	2	1	0	0	0	0	0	0	0	0	0	12	76	35	11	4	1	0	0	1	0
68	2	41.3478	140	74	20	95	36.72	38	2.8	13.5714	12.3	80	11.1	14.9	131	4.6	3.21904	14.2	204.822	31.4	1.3	1.6	15	45	1.4	304	0	1	1	0	1	1	0	1	0	0	0	0	0	6	55	31	14	13	0	0	0	0	0
39	2	24.4792	92	93	15	100	36.5	18	2.2	8.18182	3.7	193	9.5	17.7	145	4.6	1	15.7	222	35	1.4	3.1	151	223	2.9	264	0	1	3	0	0	1	0	0	0	0	0	1	0	16	83	39	15	6	1	1	0	0	0
48	1	27.388	98	78	17	95	37.22	25	3.2	7.8125	1.5	20	7.2	17.8	138	3.8	3.21904	19.6	160	38.9	1.8	2.5	26	27	1.2	159	1	1	2	0	0	0	0	0	0	0	0	0	0	9	52	23	14	5	0	1	1	1	1
64	2	23.1009	124	107	33	98	37.06	18	3.1	5.80645	14.8	233	11.5	13.6	143	4.5	1.3	33.3	676	47.7	3	0.5	11	79	1.2	401	0	0	0	1	0	0	1	0	0	1	0	1	0	6	51	44	14	14	0	0	0	0	0
79	1	26.9111	80	77	11	92	36.83	80	2.4	33.3333	9.2	141	8.8	16.2	132	3.6	1.4	14.1	204.822	23	1.3	0.4	24	33	2	135	0	1	1	1	0	1	0	0	0	0	0	1	0	6	56	33	13	11	0	0	0	0	0
69	2	34.5469	111	81	17	100	38.06	17	2.9	5.86207	8.2	83	10.4	14.7	135	3.7	1.3	14.9	204.822	25.8	1.4	0.9	63	157	1.1	482.686	0	1	2	1	1	0	0	0	0	0	0	0	0	6	32	36	15	3	0	1	0	0	0
48	2	22.6956	98	68	20	100	36.39	22	3.2	6.875	7.6	136	4.8	19.2	143	4.3	9.1	16.8	89	40.8	1.6	16.7	50	211	1.8	525	1	1	3	1	0	0	0	1	0	0	0	1	0	14	72	34	15	5	1	1	1	1	1
66	2	32.8466	100	82	24	100	36.39	76	2.4	31.6667	14	55	5.8	14	132	3	3.21904	20	204.822	40	2	18	53	89	4.5	482.686	0	1	2	0	1	1	0	0	0	1	0	1	0	5	27	54	14	5	0	1	1	0	0
76	2	33.168	75	91	19	96	36.61	88	3.6	24.4444	6.1	144	6.9	17.5	139	3.7	1.5	15.5	204.822	25.9	1.4	1.1	8	16	2	482.686	0	0	0	1	0	1	1	0	0	0	0	0	0	4	54	27	15	14	0	0	0	1	0
63	2	21.7982	109	82	29	91	36.11	24	1.6	15	4.8	32	9.1	14.5	134	3.9	5.7	17.6	206	54.9	1.6	1.5	66	249	2	373	0	1	3	1	1	1	0	0	1	1	0	1	0	13	85	43	14	13	1	1	1	1	1
51	2	34.1908	109	117	16	100	37.22	23	2.3	10	18.6	150	9.5	15.7	141	5.3	1.7	16.1	210	35.8	1.4	4.1	36	63	1.1	289	1	1	3	1	0	1	0	0	0	0	0	1	1	7	92	43	3	5	0	0	0	1	1
62	2	26.8274	100	108	30	100	34.56	24	3.9	6.15385	11.4	154	5.4	36	145	3.5	14	24.8	53	67.1	2.3	21.2	80	553	4.5	730	1	1	3	0	0	0	1	1	0	0	0	1	0	21	122	46	3	11	1	1	1	1	1
60	2	33.5176	98	79	16	100	36.39	27	2.3	11.7391	9.3	83	6.7	19	113	4.1	3.21904	24.7	118	33.9	2.3	6.1	15	74	1.9	170	0	1	2	1	0	0	0	0	1	0	0	1	0	6	63	37	15	5	0	0	1	0	0
37	1	23.341	90	100	14	100	37.22	9	3	3	7	48	8.7	18	141	3.8	0.9	17.4	202	35.9	1.6	1.8	479	625	0.5	482.686	0	0	0	1	0	0	0	0	0	0	0	1	0	4	37	36	15	5	1	1	1	0	0
74	2	32.0295	88	70	15	99	37.06	22	2.8	7.85714	2.7	53	8.4	16.4	140	3.6	2.9	12.4	204.822	32.8	1.1	0.8	8	16	1	196	0	1	1	1	0	1	0	1	0	0	0	0	0	4	45	21	15	7	0	0	0	0	0
71	2	30.8248	86	55	11	89	37.56	15	3.5	4.28571	15	85	10	21.8	137	4.7	1.4	16.6	204.822	36.2	1.5	1.9	24	48	1.1	194	0	1	2	1	0	1	0	0	1	0	0	1	0	6	38	23	15	7	0	0	1	0	0
53	1	24.9079	83	73	21	96	37.06	6	3.6	1.66667	3.7	49	9.3	15.7	134	3.6	3.21904	17	204.822	48.2	1.6	2.1	37	76	0.5	176	0	1	2	0	0	0	0	0	0	0	0	1	0	7	43	31	13	4	0	0	0	0	0
51	1	26.5643	125	91	23	94	37.39	3	4.1	0.731707	10.2	129	10.7	18.5	147	3	3.2	35	92	53.6	3.3	12.6	33	66	0.6	277	1	1	3	1	0	1	0	0	1	0	0	1	1	9	66	28	14	5	1	0	1	1	1
61	2	21.1541	101	67	31	97	36.56	21	2.4	8.75	6	292	11.5	15.2	139	4	11	15.4	204.822	63.8	1.4	1.3	21	20	0.8	284	1	1	1	1	1	0	1	0	1	0	0	0	0	2	36	26	15	12	0	0	1	1	1
58	2	28.3419	137	76	23	100	36.78	15	2.5	6	14	55	5.8	14	135	3.7	2.9	14	162	23.6	1.3	2.3	15	26	0.7	149	0	1	2	1	1	0	0	0	1	1	0	0	0	9	42	38	15	2	1	1	1	0	0
68	2	22.4877	58	107	0	100	36.72	18	3.1	5.80645	1.7	79	7.8	18.6	140	2.9	2.6	15.2	221	32	1.4	14.6	186	445	1.4	684	1	1	1	1	0	0	0	0	0	0	0	0	0	11	56	27	15	7	0	1	0	1	1
56	2	33.6593	87	72	26	100	36.28	15	2.7	5.55556	9.1	90	10.1	15.5	138	3.9	1.6	17.1	204.822	36.8	1.6	2.2	26	78	0.9	482.686	0	1	3	1	0	0	0	1	0	0	0	1	0	7	31	40	15	7	1	1	0	0	0
72	2	37.589	86	142	27	99	35.83	25	3.3	7.57576	43.7	431	8.9	16.4	134	5.7	10.4	15.7	415	29.3	1.4	0.8	35	50	2.7	357	0	1	3	1	0	0	0	1	0	1	1	0	0	10	79	50	14	8	0	0	1	1	1
65	2	21.6049	78	65	16	90	36.06	68	2.8	24.2857	21	115	12.2	20.5	143	5.1	3.3	19.9	162	42.2	1.8	23.3	608	1578	1.5	407	0	1	3	1	0	0	0	0	1	0	0	1	0	15	76	36	15	5	1	1	1	1	1
68	2	30.4867	90	79	15	96	35.83	32	3.1	10.3226	3.9	44	11.5	21.9	141	4	3.21904	21.4	156	59.6	2	42	62	171	1	246	0	0	0	0	0	1	1	0	0	0	0	0	1	7	26	14	12	7	0	0	1	1	1
60	1	23.1633	61	51	16	96	36.94	13	2.5	5.2	3.2	52	11.5	13.9	139	3.8	3.21904	15.3	204.822	47	1.4	1.1	113	120	0.8	482.686	1	1	1	1	0	0	0	0	1	0	0	1	0	6	39	21	15	4	0	0	1	1	1
68	2	27.3625	72	105	25	97	37	20	3	6.66667	17.5	121	14.6	13	138	4.8	1.5	12.7	196	35.5	1.2	5.1	234	614	0.8	482.686	0	1	2	1	0	0	0	0	0	0	0	0	0	6	46	21	15	5	0	0	1	0	0
62	1	35.1515	106	80	19	99	37.11	16	3.1	5.16129	8.4	183	8.5	18	137	4.7	5.4	20.1	233	44	1.8	2.7	4720	5249	1	8836	1	1	2	1	0	1	0	1	0	1	0	1	0	8	61	34	15	7	0	0	1	1	1
54	1	25.8291	106	77	14	100	37.28	13	2.6	5	6.9	87	11.2	18.1	137	3.3	4.2	17.6	209	45.2	1.6	8.4	502	1319	0.7	223	0	1	3	1	0	1	0	0	0	0	0	1	0	12	51	37	14	8	1	1	0	0	0
52	2	36.2208	104	75	16	99	36.67	18	3.1	5.80645	6.8	100	13.7	13.8	138	4.6	3	13.9	204.822	35.8	1.3	3.5	79	165	1.2	482.686	0	1	2	1	0	0	0	0	0	0	0	1	0	16	100	40	3	3	0	0	0	0	0
73	2	24.4746	80	49	11	99	38.06	16	3.1	5.16129	25.1	162	9.6	13.4	139	4.6	3.4	16.1	178	39.5	1.4	0.8	24	93	0.8	296	0	1	2	1	0	1	0	0	0	0	0	0	0	4	36	39	14	5	0	0	0	0	0
73	1	37.6943	125	91	22	98	36.83	73	2.8	26.0714	4.5	65	8.1	18.6	136	4.2	2.7	18.4	204.822	29.8	1.7	1.4	18	69	2.5	482.686	0	1	2	1	0	0	1	0	0	0	0	0	0	8	68	31	14	10	0	0	1	1	1
55	2	24.8016	69	79	14	93	37.28	20	3	6.66667	7.4	67	9.4	16.7	137	3.9	3.7	20	85	40.3	1.8	4.6	32	59	0.7	227	1	0	0	1	0	0	0	0	0	0	0	0	0	5	42	24	15	5	0	0	1	1	1
66	2	54.7045	91	116	24	95	36.06	42	3.5	12	16.2	270	8.3	17.8	136	5	2.6	16.9	196	24.7	1.6	0.9	131	146	1.4	568	0	1	3	1	1	0	0	0	1	1	1	1	0	7	53	35	11	8	0	0	0	1	0
51	2	30.3623	86	82	14	100	36.67	15	2.4	6.25	10.9	234	10.2	15.6	139	4.1	2.4	13	204.822	34.3	1.1	0.4	13	27	1.1	277	0	0	0	0	0	1	0	0	0	0	1	0	0	4	34	32	15	6	0	0	0	0	0
57	2	30.3623	140	82	24	99	38.78	32	2.5	12.8	22.1	255	10.3	15.3	133	4.7	2.2	18.7	204.822	36	1.7	25.5	115	208	1.5	424	0	1	3	0	0	0	0	1	0	0	0	1	0	6	69	41	15	4	1	0	1	1	1
66	2	35.7442	97	70	24	96	37.44	15	2.8	5.35714	22.5	174	11.3	15.9	148	5.4	7.1	19.6	142	45.4	1.8	2	3024	4364	1.1	729	0	1	3	1	1	1	0	1	0	0	0	0	0	13	70	32	15	6	1	1	1	0	0
55	1	43.75	70	62	27	99	35.72	12	3.2	3.75	7.7	39	8.8	19.3	138	3.5	4	50.1	42	150	4.6	8.3	24	51	2.9	320	1	1	3	1	0	1	0	0	1	0	0	1	0	14	87	38	15	5	1	1	1	1	1
56	2	28.2207	95	78	19	100	36.89	36	3.9	9.23077	12.2	234	8.1	16.3	136	4.3	2	13.4	259	42.8	1.2	13	420	736	3.6	485	0	1	3	0	1	1	0	0	0	0	0	1	0	10	90	41	13	6	0	0	0	0	0
52	2	19.9854	74	89	20	100	36.56	12	3.6	3.33333	9.2	61	10.4	12.6	139	4.1	5.9	18.1	151	30.7	1.7	2.4	811	1543	0.8	383	0	0	0	1	0	0	0	1	0	0	0	0	0	6	28	15	15	4	0	0	1	0	0
57	2	68.5813	74	99	24	99	36.28	30	2.4	12.5	26.9	69	11.8	15.9	133	5.5	4.4	36	105	59.2	3.3	17.1	510	2438	2.1	1279	0	1	3	1	1	0	0	1	0	0	0	1	0	18	102	41	10	4	1	0	1	1	1
49	2	29.5321	93	90	20	99	36.72	11	2.4	4.58333	7.4	84	13.1	18.1	138	3.9	0.5	15.2	204.822	34.1	1.4	1.5	13	18	0.7	482.686	0	1	2	0	0	0	1	0	0	0	1	1	0	4	17	21	15	7	0	0	0	0	0
57	2	26.4668	87	76	14	100	36.33	37	3	12.3333	4.3	39	6.9	15.7	132	5.7	2.4	23.1	204.822	33.2	2.2	4.9	33	43	2.3	171	0	1	2	1	0	0	0	0	1	0	0	1	0	8	60	35	15	7	1	1	1	0	0
59	2	25.1235	67	78	15	100	36.33	16	2.4	6.66667	14.5	97	10.4	14.6	139	4.7	1.6	14.9	135	34.3	1.4	18	53	89	1	482.686	0	1	2	0	1	1	0	0	0	1	0	1	0	8	19	36	14	3	1	1	0	0	0
55	2	25.085	90	89	17	97	37.61	6	2.8	2.14286	5.7	35	8.3	16.4	140	3.3	3.21904	17.7	332	35	1.6	9.7	42	310	0.5	474	0	1	2	0	0	0	0	1	1	0	0	1	0	8	49	22	12	2	0	0	1	0	0
32	2	35.7497	97	87	19	95	36.39	81	3.1	26.129	19.6	133	11.5	17.7	129	3.7	2.5	30.5	204.822	53	2.8	41.9	42	91	4.5	341	1	1	2	1	0	0	0	1	0	0	0	1	0	10	69	25	15	3	0	0	1	1	1
52	1	25.4808	113	83	45	93	38.22	41	3.3	12.4242	17.4	60	9.1	21.7	146	3.9	3.8	24.7	190	35.2	2.3	7.6	32	51	1.5	482.686	1	1	3	1	0	0	0	0	1	0	0	1	0	13	62	35	15	4	0	0	1	1	1
59	1	26.497	114	71	40	95	37.22	11	3.6	3.05556	44.1	236	9.9	20	136	3	1.7	14.1	204.822	150	1.3	1.2	20	34	0.9	222	0	0	0	1	1	0	0	0	0	1	1	1	0	6	58	32	15	4	0	0	0	0	0
57	1	15.873	98	63	17	100	36.28	48	3.7	12.973	6.9	36	8.4	16.2	128	4	3.21904	17.8	204.822	42.2	1.6	3.7	18	37	1.6	196	0	1	2	1	0	0	0	0	0	0	0	1	0	11	70	40	11	6	0	0	1	0	0
78	2	32.7381	88	57	30	99	37.61	11	2.4	4.58333	9.8	79	9.2	19.5	137	3.9	3.21904	15.3	439	31	1.4	1.2	6	18	0.7	578	0	1	3	0	1	0	0	0	0	0	0	1	0	7	34	37	14	4	0	1	0	0	0
55	1	24.3418	95	76	13	99	36.5	62	2.6	23.8462	4.4	78	11.7	16.9	141	3.8	1.6	21.4	231	35.4	2	4.6	335	1593	2.6	614	0	1	2	1	0	0	0	0	1	0	0	1	0	11	73	30	12	4	0	0	0	0	0
68	1	30.346	71	65	14	100	38.22	63	3.5	18	3.5	90	8.2	17.4	140	3.9	0.9	21.1	204.822	29.8	1.9	0.4	19	22	1.6	482.686	0	1	2	1	0	1	1	0	1	1	0	0	0	11	55	37	11	6	0	0	1	0	0
72	1	20.6207	88	61	17	95	36.22	14	2.4	5.83333	4.2	558	4.6	15.5	141	4.9	1.7	19.4	499	26.9	1.8	18	53	89	0.9	153	0	1	2	1	0	0	1	0	0	0	0	0	0	7	52	40	6	5	1	0	0	0	0
60	1	27.076	91	88	15	98	37.5	12	4.1	2.92683	2.5	98	11.4	14.1	149	3.1	13.1	13.8	312	33.9	1.2	2.7	627	1164	0.9	1422	0	0	0	1	1	1	0	0	0	0	0	0	0	8	51	26	15	5	0	1	1	0	0
73	1	42.8304	92	93	18	90	36.33	76	3.9	19.4872	10.2	18	7.7	23.9	137	4	2.9	24.8	91	39.9	2.3	9	27	60	3.9	369	0	1	2	1	0	0	0	0	1	0	0	1	0	16	66	39	15	10	0	1	1	1	1
35	1	33.3276	114	96	20	99	37.61	30	2.3	13.0435	13.6	73	10.5	15.3	136	4.1	2.1	33.4	170	31.3	3.1	2.1	72	595	1.8	717	1	1	3	1	0	0	0	1	0	0	0	1	0	14	70	39	15	3	0	0	0	1	1
62	2	32.9469	81	64	14	95	36.44	24	2.9	8.27586	8.9	108	10.9	15	120	4.5	3.4	18.8	204.822	42.7	1.7	2.7	21	92	2.8	482.686	0	1	2	0	0	0	1	0	0	0	0	0	0	8	48	35	14	7	0	0	0	1	0
61	2	27.128	82	63	19	100	37	27	2.7	10	14.5	110	6.8	17.2	144	4.7	1.3	17.8	113	29.3	1.6	1.3	221	350	1.3	531	1	1	2	1	1	0	0	1	0	0	0	1	0	7	50	39	11	5	0	0	1	1	1
56	1	29.375	92	107	7	99	37.11	20	2.6	7.69231	8.3	59	9	16.3	138	4	1.3	14.5	155	35.6	1.3	1.3	73	200	3.2	929	0	1	3	1	0	0	0	1	0	1	0	1	0	11	46	28	15	4	0	1	0	0	0
69	2	25.344	104	95	16	100	36.78	15	2.4	6.25	15.9	459	10.5	21.4	129	4.3	2.5	27.3	190	36.8	2.5	0.7	13	14	0.7	139	0	1	3	1	0	0	0	1	0	0	0	1	0	8	45	40	15	5	0	0	1	1	1
51	1	20.851	114	103	23	94	38.11	10	2.8	3.57143	14.8	49	7	20	134	3.2	1.7	19	204.822	36.8	1.8	3.4	47	190	0.5	290	1	0	0	0	1	0	0	1	0	0	0	1	1	8	54	33	12	5	0	0	0	1	1
62	2	20.753	92	88	17	98	37.22	56	3.2	17.5	15	256	11.4	14.7	132	4.5	1.5	14.3	204.822	30.4	1.3	1	17	47	7.8	375	0	1	3	1	0	1	1	0	1	0	0	1	0	10	32	32	15	11	0	0	1	1	0
42	2	31.055	137	71	22	100	36.5	23	2.9	7.93103	26.1	77	11.4	15.9	144	4.6	12.2	20.3	151	38.5	1.9	7.9	227	941	1.4	1613	1	1	3	1	0	0	0	0	1	0	0	0	0	19	114	56	3	3	1	1	1	1	1
62	2	27.9904	101	84	21	96	36.72	9	3.2	2.8125	4.6	196	8.6	18.3	135	4.2	3.21904	14.5	266	31.7	1.4	1.1	41	50	0.8	207	1	1	3	1	1	1	0	0	0	0	0	0	0	3	51	37	15	12	0	0	1	1	1
53	1	29.2969	102	56	31	97	36	50	1.8	27.7778	18.8	49	10.1	16.4	129	4.2	1.5	20.2	313	44.7	1.9	5.9	77	194	2.6	235	1	1	2	1	0	0	0	0	1	0	0	1	0	16	100	41	15	4	1	1	1	1	1
58	1	30.9903	100	100	18	99	37.06	11	2.9	3.7931	18	111	9.9	17.2	141	4	1.4	16.2	204.822	58.2	1.5	1.8	20	76	0.9	487	0	1	3	1	1	0	0	0	1	0	0	1	0	6	61	41	11	9	1	0	1	1	1
56	2	50.0283	104	68	29	99	37.83	23	2.5	9.2	10.4	56	13.5	14.6	141	3.5	5.8	23.8	141	56.5	2.3	4.2	101	217	2.5	479	0	1	2	1	0	0	0	0	0	0	0	1	1	10	67	37	15	4	0	0	0	1	0
48	1	41.4016	100	110	18	97	36.94	13	2.5	5.2	13.9	80	8.2	19.3	132	3.1	1.7	51.9	142	61.7	4.8	34.8	20	112	1.6	360	0	1	3	1	1	0	0	1	0	0	0	1	0	15	84	40	12	4	1	1	1	1	1
60	2	43.5091	74	46	9	96	34.94	112	2.4	46.6667	15.5	49	10	24.3	129	4.1	3.8	72.7	195	108.7	6.1	52	79	154	6	482.686	0	1	3	0	0	0	0	0	1	0	0	1	0	15	80	44	14	4	1	0	1	1	0
60	2	26.4626	76	115	9	100	36.72	72	3.2	22.5	3.1	82	8.8	18.3	136	3.3	3.21904	18.4	204.822	49.9	1.7	2.4	109	264	2.1	302	0	1	2	0	0	0	0	0	0	0	0	0	0	7	51	23	15	3	0	0	0	0	0
56	1	20.8215	96	64	14	99	36.11	19	3.4	5.58824	5	57	8.7	17.8	117	4.7	3.21904	23.3	61	62.1	2.2	6.7	56	57	0.4	337	1	1	1	1	0	0	0	0	0	0	0	1	1	7	56	27	13	4	0	0	1	1	1
58	1	24.8016	98	92	18	99	35.72	31	2.3	13.4783	4.6	69	9.9	19	142	4.3	3.8	44.2	66	54.2	4.9	9.4	60	89	1.1	441	0	1	1	1	1	1	0	0	0	0	0	1	1	9	81	36	7	5	0	0	1	1	1
51	2	36.0854	75	91	18	93	36.94	33	3.7	8.91892	6.6	67	10.4	20	144	4.3	1.1	15.5	204.822	27.9	1.4	3.3	24	76	1	230	1	1	3	0	0	1	0	0	0	0	0	1	0	8	38	42	15	5	0	0	0	1	1
51	2	24.2188	108	98	24	100	38	19	3.2	5.9375	12.1	221	11.9	12.9	141	4.2	3.6	13.4	261	23.4	1.1	2.2	1582	2444	1.3	1722	0	0	0	1	0	0	0	0	0	0	0	0	0	8	38	25	15	6	0	0	0	0	0
71	2	25.9531	60	75	15	99	36.78	27	2.4	11.25	6.8	161	9.1	16	140	4.8	1	21.3	179	36.9	2	1.9	19	38	1.5	164	0	1	2	1	0	0	1	0	0	1	0	0	0	7	52	38	15	8	1	0	1	0	0
54	1	37.324	85	55	28	95	36.83	17	2	8.5	11.1	87	9	23.5	139	3.7	3.21904	26.7	138	38.3	2.5	15.2	44	127	0.9	442	0	1	1	1	1	0	0	1	0	0	0	1	0	8	53	27	14	2	0	0	0	1	0
60	2	22.3214	115	92	16	97	36.83	64	2.9	22.069	7.9	292	10.4	14.1	129	3.9	1.4	15.8	226	25.6	1.4	1.8	53	12	2.3	118	0	1	2	1	1	0	0	0	0	0	0	1	0	7	56	34	15	4	0	0	1	0	0
52	2	53.1463	94	133	25	99	36.56	33	2.6	12.6923	11.8	71	6.8	25.7	132	4.8	1.4	23.9	203	38.5	2.2	27.8	15	42	1.8	308	0	1	3	1	1	0	0	0	1	0	0	1	0	14	70	25	15	4	1	1	1	1	0
57	2	26.1962	117	68	21	99	37.78	33	2.6	12.6923	4.4	86	8	16.5	140	3.6	3.2	21.1	165	45.3	2	3	17	60	3.3	203	0	1	3	1	0	1	0	0	0	0	0	0	0	13	61	51	15	5	1	1	1	0	0
71	1	21.3294	97	75	28	95	35.67	34	3.1	10.9677	5.5	135	8.3	15.4	133	4.5	3.21904	13.2	204.822	27.2	1.1	1	45	49	0.6	211	0	0	0	0	0	0	0	0	1	0	0	0	0	5	45	36	14	8	0	0	1	1	0
59	1	18.9273	105	84	25	96	37.61	21	3	7	30.6	251	9.8	20.3	136	3.8	3	19.1	204.822	50.1	1.7	1.9	81	96	0.5	226	0	0	0	1	0	0	0	1	1	1	0	0	0	5	50	30	13	2	0	0	0	0	0
50	2	32.4936	108	89	23	99	37.39	13	3	4.33333	8.6	166	9.9	14.6	136	4.4	1	13.6	204.822	30.9	1.3	0.4	10	17	0.8	101	0	1	2	1	1	0	0	0	1	0	0	0	1	4	45	41	10	4	0	0	0	0	0
72	2	34.5469	96	115	26	95	37	19	3.5	5.42857	11.9	206	14.7	14.5	138	4	1.2	20	204.822	40	2	0.5	18	23	1.3	482.686	0	1	3	1	0	1	0	0	0	0	0	0	0	9	57	40	11	8	0	0	0	0	0
64	2	30.7008	106	101	17	100	36.56	22	2.8	7.85714	15.8	162	10.2	15.7	141	4.9	2.6	22	215	56.8	2.1	4.3	3094	4989	0.8	3600	0	1	2	1	1	1	0	0	0	1	0	0	0	9	48	31	14	8	1	1	0	0	0
33	1	38.9584	117	83	21	100	36.56	8	2.9	2.75862	18.5	90	9.1	16.9	137	4.2	8.6	28	95	150	2.6	4.9	19	39	1.6	360	0	1	3	1	0	1	0	0	0	0	0	1	0	14	61	35	15	5	1	1	1	1	1
70	2	28.0387	89	101	21	99	36.78	15	3.2	4.6875	6.4	55	11.9	14.8	143	3	4.6	18.1	128	46	1.7	2.5	164	255	0.9	189	0	1	2	1	1	0	0	1	0	0	0	1	0	12	67	36	10	3	1	1	0	0	0
40	1	16.9714	89	77	18	99	36.78	28	2.3	12.1739	15.2	269	9.6	15.1	137	4.8	1.6	14.1	204.822	31.9	1.3	1.4	45	90	0.6	265	1	0	0	0	0	0	0	1	0	0	0	0	0	1	41	33	15	3	0	0	1	1	1
71	2	26.0085	76	55	22	100	36	18	2.5	7.2	12.4	147	11.2	18	143	4	4.8	13.5	204.822	25.6	1.2	1.8	11	30	0.8	272	0	1	3	0	1	0	0	0	0	0	0	0	0	4	51	30	15	6	0	0	0	1	0
39	1	39.2563	100	73	21	96	37.78	3	2.9	1.03448	6.3	179	8.9	22.2	129	4	1.9	22.8	204.822	34.8	2.2	9.9	68	164	0.6	619	0	0	0	1	1	0	0	1	0	0	0	1	0	4	53	32	15	1	1	0	0	0	0
76	1	33.5176	73	73	23	99	37.06	16	2.3	6.95652	14.9	76	5.9	17.8	142	3.6	3.21904	15.2	238	32.7	1.4	1.7	18	41	0.8	289	0	1	3	1	0	0	1	1	0	0	0	0	0	8	47	36	14	7	0	0	0	1	0
49	2	29.8682	88	104	8	95	37.33	52	2.4	21.6667	15.3	114	9.2	17.4	127	5.6	1.2	22.7	204.822	33.7	2.1	10	52	70	1.8	281	1	0	0	1	0	0	1	0	0	0	0	1	0	6	69	20	15	5	0	0	1	1	1
68	1	26.5052	80	83	16	100	36.89	25	2.4	10.4167	27.8	395	9.1	17.7	137	4.5	2.7	15.8	255	37.3	1.4	18	53	89	1.3	482.686	0	1	1	0	0	1	1	0	0	0	0	0	0	4	34	22	14	9	0	0	0	0	0
75	1	28.5573	65	88	18	94	36.78	23	3.6	6.38889	5.7	75	8.3	16.5	142	3.8	3.21904	26.9	204.822	61.2	2.5	10.5	16	27	1.2	187	0	1	1	0	1	0	0	1	0	1	0	1	1	7	36	16	15	6	1	0	1	0	0
50	1	26.8211	87	79	28	94	36.67	12	1.9	6.31579	23.8	205	8.1	22.2	140	3.1	2.4	20.9	204.822	29	1.9	2.5	41	67	0.4	400	0	1	2	1	0	0	1	1	0	0	0	1	0	5	45	22	15	2	0	0	0	0	0
68	2	38.5306	76	76	19	92	36.28	84	3.3	25.4545	14.4	98	7.1	17	135	4.9	3.21904	22.1	204.822	26.7	2	2	195	174	4.3	369	0	1	3	0	0	0	0	1	0	0	0	0	0	9	51	26	15	7	0	0	1	0	0
51	1	33.3404	89	68	22	100	36.94	57	2.4	23.75	12.1	87	7.8	16.6	137	3.7	3.2	16.1	159	30.2	1.5	4.2	7	27	1.8	205	0	0	0	1	1	0	0	0	0	0	0	1	0	7	43	21	14	4	0	1	1	0	0
52	1	35.8206	97	73	21	91	36.44	34	3.9	8.71795	5.8	45	6.1	21.4	123	4.2	7.1	28.5	85	70.1	2.7	17.4	40	59	0.8	250	0	1	3	1	1	1	0	0	0	0	0	1	0	8	73	22	15	6	1	0	1	1	1
59	2	50.1831	93	64	20	98	37	16	3.2	5	6.2	50	10.3	16.6	134	4.1	5.3	21.3	111	68.1	2	4.6	45	97	1.6	298	0	1	3	1	1	0	0	0	0	0	0	1	0	6	52	33	15	4	0	0	1	0	0
50	2	33.3759	101	97	22	100	36.28	11	3.2	3.4375	5.7	77	11	14.1	140	3.7	2.7	18.1	193	38.1	1.7	2.4	228	392	0.6	259	1	1	2	1	0	0	0	0	0	0	0	0	0	7	31	38	13	5	0	1	0	1	1
41	2	27.8058	79	87	24	89	33.67	44	4.1	10.7317	24.7	112	9.2	16.5	134	3.4	3.3	38.8	136	99.5	4.2	36.5	42	80	0.8	482.686	0	1	3	0	1	1	0	1	1	0	0	0	1	14	95	34	15	4	1	0	1	1	1
45	2	24.9653	125	77	22	100	37.72	38	2.4	15.8333	16.6	118	5.9	18.6	136	4.7	5.8	23.4	176	37	2.1	4.6	22	46	2.4	198	0	1	2	1	1	0	0	0	0	1	0	1	0	7	74	30	15	3	0	0	1	0	0
68	1	28.3447	82	99	11	89	36.89	32	2.4	13.3333	22.4	150	8.3	15.2	142	4.2	2	14.6	204.822	40	1.3	1.3	8	30	1.8	482.686	0	1	2	0	0	0	1	1	0	0	0	1	0	4	35	17	15	5	0	0	1	0	0
78	1	30.2579	88	62	12	100	36.72	25	2.4	10.4167	13.1	218	5.3	15	144	3.5	1.9	16.8	189	33.7	1.6	0.8	13	16	0.8	220	0	1	2	0	1	0	1	0	0	0	0	0	0	6	34	35	15	5	1	1	1	0	0
70	2	37.2024	77	61	34	92	36.61	27	3.4	7.94118	11.4	113	6.3	17.2	129	4.9	4.1	38.3	108	66	3.4	15.5	29	67	1	167	0	1	2	1	1	0	0	1	0	0	0	0	0	12	47	33	15	6	1	1	1	1	0
52	2	28.3003	94	63	16	100	36.89	24	3.2	7.5	3.8	57	8.8	19.3	144	4	2.5	14.4	165	30.9	1.3	1.4	59	156	0.8	507	1	1	2	1	1	0	0	0	0	1	0	1	0	5	43	37	15	4	1	1	1	1	1
56	2	32.7027	87	77	57	98	36.56	13	2.3	5.65217	22.5	124	8.5	14.9	133	4.2	3.4	36.5	204.822	40.6	3.4	13.1	27	64	0.6	329	1	0	0	1	0	0	0	0	0	0	0	1	0	5	60	34	15	4	0	0	0	1	1
59	2	25.6173	96	71	24	92	36.94	29	2.2	13.1818	10.6	98	7.9	17.3	142	4.5	2	20.1	203	30.3	1.8	6.4	59	152	1.2	192	0	1	3	1	0	0	0	0	0	0	0	1	0	11	53	37	14	6	1	0	0	0	0
63	2	32.9625	101	92	28	100	37.61	10	3	3.33333	24	138	11.6	14	145	4	3.3	16.3	158	38.5	1.5	1.7	322	645	0.8	482.686	0	1	1	1	0	0	0	1	0	0	0	0	0	6	20	27	15	7	0	0	0	0	0
57	1	35.112	85	59	20	98	37.33	55	2.5	22	35.6	138	11.7	17.1	133	4.3	4.8	26.1	80	46.2	2.6	5.5	34	87	2.1	434	0	1	1	1	0	0	0	1	0	0	0	0	0	9	78	22	15	5	1	0	0	1	0
55	2	34.5096	72	74	14	100	37.67	45	3.1	14.5161	5.8	79	8.2	16.7	150	3.9	3.21904	20.3	204.822	57.8	1.9	1.7	42	53	1.5	178	0	1	2	1	0	0	0	0	0	0	0	1	0	5	34	29	15	4	0	0	0	0	0
55	1	27.993	95	78	16	99	37.28	30	2.4	12.5	10.2	45	8	23.9	125	3.7	2.7	21	204.822	41.8	1.9	9.6	34	141	0.9	482.686	0	1	3	1	0	0	0	0	0	0	0	1	0	11	66	35	15	5	0	1	1	1	0
66	1	21.5242	56	78	15	100	34.67	12	3.2	3.75	21.9	216	8.1	17	141	4.6	2.8	13.4	211	23.9	1.2	0.3	8	26	0.4	273	0	1	2	0	0	0	1	0	0	1	0	0	0	5	45	39	14	5	0	0	0	0	0
58	1	16.5108	77	101	15	100	36.44	4	3.9	1.02564	4.6	55	5.8	14	116	3	1.9	11.6	296	25.3	1.1	0.6	30	70	0.5	295	0	0	0	1	0	0	0	0	1	0	0	0	0	2	40	28	13	2	0	0	0	1	0
50	2	44.2885	90	83	18	94	36.78	24	3	8	7.1	70	9.8	16.4	133	3.2	1.8	12.7	282	30	1.2	1.3	6	17	1.4	147	1	1	1	1	1	1	0	1	1	1	0	1	0	5	32	26	15	5	0	0	1	1	1
63	2	30.4705	75	63	13	94	37.17	37	3.7	10	5	204	12.1	15.6	132	4.3	3.21904	17.9	204.822	32.3	1.6	0.3	53	59	1.7	302	1	0	0	0	0	1	1	1	0	1	0	0	0	2	49	29	15	9	0	0	0	1	1
66	2	27.4013	88	83	17	97	36.28	33	3	11	11.2	132	11.6	13.7	134	5.7	1.8	13.2	189	35.7	1.2	1.6	64	121	2.1	495	0	1	3	1	0	0	0	0	1	0	0	1	0	12	78	50	7	4	0	0	1	0	0
61	1	15.2734	70	83	14	97	36.44	29	2.7	10.7407	5.2	108	5.8	22.5	138	3.7	3	16.9	204.822	32.2	1.6	12	42	134	1	243	1	1	1	1	0	1	0	0	0	0	0	1	0	8	65	29	14	6	0	0	1	1	1
56	2	30.1162	74	77	13	100	37.28	12	2.3	5.21739	18	96	10.8	18.6	134	4.5	0.8	16.3	184	34.2	1.5	2.1	420	607	0.7	258	1	1	3	0	0	0	0	0	0	0	0	1	0	15	107	40	3	4	0	1	0	1	1
56	2	30.6148	90	133	12	99	35.56	15	3.2	4.6875	13.6	185	16	12.7	143	4.8	1.8	13.6	204.822	21.3	1.2	0.6	135	79	1.1	221	0	1	1	1	1	0	0	0	0	0	0	0	0	5	37	34	13	2	0	0	0	0	0
64	2	56.1933	70	94	17	100	36.44	27	2.5	10.8	14.4	149	10.5	17.2	142	3.4	1.9	17.1	238	29.1	1.6	1.6	21	34	1.6	482.686	0	1	3	1	0	0	0	0	1	0	0	0	0	7	38	35	15	9	0	0	1	0	0
56	1	33.5884	113	145	36	100	37.17	26	3.4	7.64706	7.4	81	7.7	19.6	151	3.7	3.21904	13.5	270	29.7	1.2	0.6	21	69	2.1	221	0	1	2	1	0	1	0	1	0	0	0	1	0	4	48	32	15	8	0	0	0	1	0
61	1	27.7319	101	80	13	96	35.89	17	2.4	7.08333	25.2	181	10.1	17.4	136	2.9	3.3	19.4	254	45.2	1.8	3.2	26	69	1.2	268	1	1	3	1	0	0	0	0	0	0	0	1	0	7	67	45	15	7	0	1	1	1	1
59	2	31.4639	72	100	13	96	36.83	15	2.4	6.25	8.1	42	13.4	13.9	132	4.8	1	13.8	173	21.5	1.3	1.8	53	39	0.6	482.686	0	1	2	0	0	1	0	0	0	0	0	0	0	4	24	23	15	3	0	1	0	1	0
42	2	30.2173	125	92	17	99	37.5	12	2.4	5	6.4	34	8.3	19.9	141	4.5	5.1	20.4	204.822	32.6	1.9	2.8	95	379	0.8	415	1	1	2	1	0	0	0	1	0	0	0	1	0	9	36	36	15	4	0	1	0	1	1
69	1	29.3848	77	88	16	100	36.89	13	3.2	4.0625	13.9	108	9.3	17.2	140	4.1	4.1	14.6	158	33.8	1.3	4.1	166	271	0.6	482.686	1	1	2	0	1	0	0	0	0	0	0	0	0	9	40	34	14	5	0	0	1	1	1
69	2	19.3792	70	60	21	100	36.5	123	2.4	51.25	6.2	186	9.9	15.9	127	4.5	0.8	11.3	204.822	43.9	1	0.8	12	9	3.7	482.686	0	1	3	0	0	1	1	0	0	0	0	1	0	5	40	23	14	7	0	0	0	0	0
71	2	22.1714	121	100	30	95	36.61	43	3.6	11.9444	19.9	285	10.6	21.2	128	5.5	8.6	27.2	222	36.7	2.5	1.6	353	559	1.4	302	0	1	1	1	0	1	1	0	1	1	0	1	0	10	63	33	15	9	0	0	1	1	0
68	1	28.3447	93	67	6	94	36.89	31	3.2	9.6875	12.6	205	8.2	15.3	142	5.5	0.9	13	204.822	29.1	1.2	0.7	10	52	1.5	482.686	0	1	2	1	1	0	0	0	0	1	1	0	0	3	46	26	14	4	0	0	0	0	0
69	2	27.5011	73	73	13	98	38.11	25	2.4	10.4167	15.4	161	9	14.3	137	4.6	0.8	18.8	204.822	36.7	1.7	18	53	89	0.9	482.686	0	1	2	1	0	0	0	0	1	0	0	0	0	5	50	34	11	6	0	0	0	0	0
71	1	23.4198	74	62	23	99	36.44	45	3.2	14.0625	7.2	85	9.3	18.6	130	4.4	2.8	15.7	204.822	37.7	1.4	1.9	21	54	2.5	482.686	1	1	2	0	0	1	0	1	1	1	0	1	0	6	49	29	13	7	0	1	1	1	1
54	2	25.6401	67	83	20	100	37.28	26	2.8	9.28571	1.2	34	9.1	15	138	3.7	3.4	14.7	138	32.4	1.4	0.9	13	31	1.3	172	1	1	1	1	0	0	0	0	0	0	0	1	0	9	46	38	15	6	1	1	0	1	1
80	1	29.9745	129	94	18	95	37.61	17	2.5	6.8	14.3	57	14.7	13.4	138	3.9	2	29.5	204.822	38.7	2.7	4.3	26	32	0.8	251	0	1	2	1	0	0	0	0	0	0	0	1	0	5	60	31	15	4	0	0	0	0	0
79	1	20.231	124	104	14	93	36.56	14	3.5	4	3.2	135	10.8	14	142	3.4	0.9	10.8	204.822	58.6	1	0.3	15	21	0.4	182	0	1	1	0	1	0	0	0	0	1	0	1	0	2	41	39	13	4	0	0	1	1	0
72	1	22.3214	101	44	21	98	36.94	3	2.4	1.25	17.8	148	8.3	15.4	128	6.1	2.2	21.3	204.822	76	2	3	22	100	2	482.686	0	1	2	1	0	0	0	0	0	0	0	0	0	9	57	30	10	6	0	0	1	1	1
62	2	18.7161	82	88	16	100	36.83	26	2.6	10	12.7	75	6.9	15.9	139	4.3	0.9	10.2	226	26.4	0.9	0.3	49	31	0.8	175	1	1	2	0	0	0	0	1	0	0	1	1	0	10	30	35	15	6	0	0	0	1	1
68	2	31.2345	88	87	4	100	37.06	13	2.7	4.81481	18.1	114	11	13.8	142	4.4	4.7	20.7	104	150	1.9	3.5	661	884	0.7	482.686	0	1	2	0	0	0	0	0	0	0	0	0	0	9	33	38	14	7	1	1	1	0	0
70	1	23.1111	93	76	22	100	36.61	10	3.4	2.94118	6.2	68	10.1	14.4	140	3.8	1.5	11.5	249	24.8	1.1	1	19	31	0.9	268	0	1	2	0	1	1	0	0	0	1	0	1	0	4	24	37	14	5	0	1	0	0	0
64	1	15.2353	109	69	14	98	36.67	3	2.7	1.11111	12.6	151	10.4	14.7	126	3.4	0.9	19.2	176	40.2	1.8	5	43	163	0.3	128	0	1	2	1	0	0	0	1	1	0	0	1	0	3	49	36	15	3	0	0	1	1	1
48	2	31.1791	123	107	24	99	36.67	29	5.3	5.4717	9.1	93	10.3	14.1	140	4.1	3.1	24.7	204.822	60.8	2.4	7.3	24	34	0.9	185	1	1	1	1	1	0	0	0	0	0	0	1	1	6	43	24	14	3	1	0	0	1	1
55	2	24.5536	82	87	14	99	36.56	11	3.5	3.14286	23.8	163	12.3	13.2	141	3	2.2	15.8	181	35.4	1.4	2.3	531	1024	0.7	482.686	0	1	1	1	1	0	0	1	0	0	0	0	0	8	31	30	15	2	0	0	0	0	0
30	1	30.2985	104	97	14	100	37.06	10	2.6	3.84615	11.8	67	13.7	14.4	148	3.7	1.7	21.7	97	38.9	2	12.4	43	89	0.5	288	1	1	2	1	0	0	0	0	0	0	0	0	0	10	38	22	15	1	0	0	0	1	1
67	2	23.6796	83	72	13	94	36.39	11	3.4	3.23529	14.8	186	9.7	15.8	143	3.8	1.8	12.5	204.822	40	1.2	18	53	89	1	482.686	0	1	2	0	1	0	0	1	0	0	0	0	0	4	36	21	11	9	0	0	1	0	0
56	1	21.1876	89	68	16	97	36.67	54	3.1	17.4194	22	173	9	20.6	127	2.6	2.7	20.6	179	39.1	1.9	30.4	51	173	1.9	177	0	1	1	1	0	0	0	1	1	0	0	0	0	12	79	27	13	5	0	0	1	1	1
61	2	33.6593	89	94	16	99	37.89	32	3.2	10	18.9	59	10.5	17.3	148	4.7	9.9	17.3	207	34.4	1.6	4.3	427	699	1.7	314	0	1	2	0	0	0	0	0	0	1	0	1	0	10	44	32	15	8	0	0	0	0	0
50	2	19.6314	138	64	15	97	36.17	71	2.6	27.3077	17.1	337	8.5	17.8	138	4.8	1.5	17.6	490	33.3	1.6	1.3	7	26	4.7	149	0	1	3	1	0	0	1	0	1	0	0	1	0	10	84	41	10	13	0	0	1	1	1
56	2	34.0472	90	87	19	95	37.39	88	3.5	25.1429	13.4	283	8.1	16.2	144	4.6	1.6	14.5	350	28	1.3	1.4	23	40	4.3	257	1	1	3	1	1	1	0	0	0	1	0	1	0	13	83	47	11	9	0	0	1	1	1
62	2	33.8292	90	71	17	100	37	37	2.3	16.087	15.4	162	11.4	13.8	137	5.5	1.6	20	204.822	40	2	0.8	121	462	3.9	500	0	1	1	1	1	0	0	0	1	0	0	1	0	12	66	48	7	4	0	0	0	0	0
64	2	47.4773	88	97	13	100	35.72	17	3.4	5	5	139	12.8	15	135	6.2	3.21904	24.6	204.822	39.8	2.4	0.9	83	139	1	273	0	1	1	0	1	1	1	0	0	0	0	0	0	3	38	37	15	5	0	0	1	0	0
73	1	43.7571	77	95	22	97	37	18	4	4.5	15.6	108	11.7	12.6	139	4	1.8	14.1	204.822	26.6	1.3	0.5	8	12	0.9	225	0	1	2	0	0	1	0	0	0	1	1	0	0	4	38	16	11	13	0	0	0	0	0
41	2	28.4864	145	82	18	97	37.61	8	2.9	2.75862	6.6	37	7.4	19.4	138	3.1	1.1	18	204.822	33	1.6	8.9	18	123	0.6	278	0	1	2	0	0	0	0	1	0	0	0	0	0	9	65	42	12	4	0	1	0	0	0
68	2	24.093	66	74	16	100	36.39	30	2.5	12	6.5	119	10.4	15.8	137	5	0.7	13.5	132	34.1	1.2	5.4	105	205	1.3	482.686	0	1	1	1	1	1	0	0	0	0	0	0	0	8	59	31	15	6	0	0	1	0	0
72	1	34.5096	94	76	17	100	36.67	49	2.5	19.6	23.2	153	9	17.5	118	5.1	3.21904	15.7	501	29	1.5	2.3	20	29	1.7	191	0	1	2	1	1	1	0	1	0	1	1	1	0	7	51	27	14	8	0	0	1	0	0
56	1	35.6245	89	65	17	100	36.44	15	3.2	4.6875	7.6	123	9.1	16.4	137	4.5	3.21904	16.2	156	30.8	1.5	3.3	44	88	0.7	432	1	1	2	1	0	0	0	0	0	0	0	0	1	5	37	38	14	11	0	0	1	1	1
67	1	20.0184	87	91	13	96	36.72	27	2.7	10	3.8	99	8.7	17.7	140	3.6	3.21904	14.4	204.822	29.9	1.3	3	37	64	0.5	100	0	0	0	1	1	0	0	0	0	0	0	0	0	5	36	33	15	6	0	0	0	0	0
54	2	51.6571	135	104	17	96	36.5	7	2.4	2.91667	9.8	73	13.8	13	138	3.3	1.1	13.9	204.822	42	1.3	1.8	28	33	0.5	482.686	0	1	3	0	1	0	0	0	0	0	0	1	0	8	26	39	15	2	0	0	0	0	0
65	2	42.608	80	79	16	99	37.22	29	2.4	12.0833	9.9	187	12.6	14	143	4.8	2.3	12.1	204.822	23.8	1.1	18	53	89	1.3	482.686	0	0	0	1	1	0	1	0	0	0	0	0	0	9	82	40	3	9	0	0	0	1	0
37	2	21.0069	116	85	20	100	36.44	25	3.7	6.75676	5.5	165	9.9	15.6	129	4	1	12.5	204.822	28.6	1.2	27.1	83	79	0.9	133	0	1	2	0	0	0	0	0	0	1	0	0	0	5	53	22	15	3	0	0	0	0	0
69	2	33.2224	66	91	15	100	36.5	18	2.9	6.2069	6.5	77	10.7	14.7	141	3.9	5.2	15	195	32.2	1.4	2.1	306	571	1	197	0	1	2	1	1	1	0	0	0	1	0	0	0	9	44	23	14	8	0	1	1	0	0
67	1	53.6704	40	53	19	99	35.89	105	3.7	28.3784	10.4	57	7	18.3	121	7	3.1	30	73	52.6	2.7	10.6	51	116	3	482	0	1	3	1	1	0	0	1	0	0	0	1	0	14	86	34	14	7	0	0	1	1	1
70	2	26.609	86	80	16	95	35.56	21	3.8	5.52632	12	259	10.5	14.6	135	4.8	1.5	12.9	204.822	23.9	1.1	0.3	106	63	1.1	219	0	1	2	0	0	0	0	0	0	0	0	0	0	3	33	27	14	6	0	0	0	0	0
59	2	31.9377	105	83	15	99	37.61	31	2.6	11.9231	12.5	75	10.7	16.9	141	4.7	1.7	16.9	235	40.7	1.5	8	485	733	1.4	482.686	0	1	1	1	0	1	0	0	0	0	0	0	0	15	56	34	12	7	0	1	0	0	0
74	1	33.1401	92	86	23	94	37.5	22	3.9	5.64103	13.5	296	12.5	12.6	136	4.6	2.5	15.7	204.822	150	1.4	1.1	38	46	1.1	482.686	0	1	1	0	1	1	1	0	0	0	0	0	0	4	46	31	15	8	0	0	1	0	0
59	1	21.6667	105	58	23	97	36.33	14	3.2	4.375	8.3	162	7.9	23.8	141	4.1	8.6	35.7	43	90.3	3.2	6.6	191	430	2	661	1	1	3	1	0	1	1	1	1	0	0	1	0	15	124	53	5	8	0	0	1	1	1
62	2	33.6593	67	87	15	95	36.83	13	2.6	5	4.2	83	6.9	16.6	143	3.3	3.21904	18.2	201	35.6	1.7	1.3	16	38	0.8	251	1	1	2	0	0	0	0	0	0	0	0	1	0	5	39	27	13	10	1	1	1	1	1
62	1	34.5096	90	81	19	94	36.28	49	2.6	18.8462	30.6	211	9.3	16.9	126	6.1	3.5	31.6	163	50.8	3	8.6	26	66	1	333	0	1	2	1	1	0	0	0	0	0	0	1	1	8	69	29	14	5	1	0	1	1	1
61	2	31.8169	90	83	22	92	36.61	41	2.3	17.8261	30.5	204	9.2	16.2	130	3	4.4	30.8	204.822	34.7	2.8	18.4	17	63	3.3	188	0	1	3	1	0	1	1	1	1	0	1	1	0	9	75	27	15	8	0	0	1	1	1
68	2	34.1976	90	76	20	95	37.17	19	2.7	7.03704	12.5	70	10.6	17.7	133	4.7	1.4	23.2	112	33.4	2.1	4.8	1381	2534	0.9	482.686	0	1	3	0	1	1	0	0	0	1	0	1	0	8	44	28	15	8	0	0	1	0	0
70	2	22.4088	82	81	27	97	37.56	18	3.5	5.14286	10.4	80	10.4	14.4	145	4.3	2	21.4	125	37.8	2	4	1368	2364	1.1	383	1	1	3	1	1	0	0	1	0	1	0	0	0	10	43	22	15	8	0	0	1	1	1
62	2	30.8957	112	97	16	92	37	12	2.4	5	13.8	173	10.5	15.3	135	3.5	3.21904	20	204.822	40	2	0.4	12	32	0.7	482.686	0	1	2	0	0	0	0	1	0	0	0	0	0	3	26	24	12	5	0	0	0	0	0
67	1	20.8984	108	117	31	94	36.89	14	3.7	3.78378	11.3	368	11.3	12.4	130	4.2	1	12.5	204.822	35.3	1.2	0.5	98	65	0.5	279	0	1	2	1	1	0	0	0	1	1	1	1	0	7	53	41	15	4	0	0	1	0	0
55	2	22.3195	102	71	14	100	37.17	45	3	15	32.6	203	9	14.3	132	4.2	4.7	16.8	176	36.5	1.5	4.9	180	413	2.1	482.686	1	1	2	0	0	1	0	0	0	0	0	0	0	16	155	56	3	6	1	0	1	1	1
53	1	24.8016	72	64	14	100	36.11	59	3.1	19.0323	2.7	52	8.1	17.1	135	4.2	1.8	17.7	204.822	41.2	1.6	1.8	25	41	1	214	1	0	0	0	0	0	0	0	0	0	0	1	0	4	49	23	15	7	0	0	1	1	1
63	2	31.3209	66	75	14	100	36.89	67	2.6	25.7692	21.8	294	12.7	13.4	128	3.3	1.5	18.4	302	36	1.7	0.8	10	34	1.7	151	1	1	2	0	1	0	0	0	0	1	0	1	0	2	45	22	15	5	0	0	0	1	1
53	2	21.2585	94	72	16	98	37.61	16	3	5.33333	9	106	12.9	16.2	145	3.7	3.21904	19.9	140	44.7	1.9	2.7	991	996	0.8	482.686	0	0	0	1	0	0	1	0	0	0	0	1	0	5	30	26	15	8	0	1	1	0	0
62	2	40.3912	59	82	21	100	37.5	49	2.3	21.3043	9.1	119	11.8	15.6	140	5	1.8	14.9	471	29.7	1.3	1.7	15	19	0.9	482.686	1	1	2	1	0	1	0	1	0	0	0	0	1	5	31	36	15	6	0	0	0	1	1
59	2	32.6973	57	69	11	96	35.83	68	4.6	14.7826	3.5	40	7.9	17.7	127	4.7	1	28.7	78	78	2.7	18.9	46	81	2.1	256	1	1	3	1	1	1	0	0	0	0	0	1	1	10	68	32	15	5	1	0	1	1	1
40	1	23.4492	103	100	19	94	36.94	8	3	2.66667	5.5	87	9.3	16.5	140	4.2	2	16.2	204.822	35.9	1.5	1.7	35	77	0.6	199	1	0	0	1	0	0	0	0	1	0	0	1	0	8	26	32	15	3	0	0	0	1	1
57	1	25.6749	93	109	11	100	36.94	11	3	3.66667	7.8	110	8.4	15	138	3.7	1.9	14.5	204.822	24.4	1.3	0.8	21	53	0.5	242	0	1	2	1	1	0	0	0	0	0	0	0	0	2	22	22	14	2	0	0	0	0	0
77	2	53.1463	102	58	15	99	36.56	19	2.4	7.91667	8.1	62	9.9	17.1	139	5.3	1	14.2	204.822	31.4	1.3	5.4	178	464	1	265	0	1	2	1	1	1	0	1	1	1	0	0	0	9	51	35	15	7	0	0	0	1	0
59	2	24.093	105	74	26	98	36.56	53	2.6	20.3846	7.8	32	8.7	14.6	134	3.8	1.6	26.2	485	34.6	2.4	6.7	149	284	5.6	296	0	0	0	1	1	0	0	1	0	0	0	1	0	13	72	37	12	4	0	0	0	0	0
62	1	27.3778	91	50	18	99	36.56	25	2.4	10.4167	5.2	66	10.7	18.7	141	5.1	1.6	13.4	204.822	28.9	1.2	1.7	18	26	0.5	158	1	1	2	1	0	0	0	0	0	0	0	1	0	7	50	38	15	6	0	1	1	1	1
47	2	23.4198	67	96	17	100	36.5	11	3	3.66667	8.5	38	14	16.3	137	3.8	6.5	13.3	204.822	29	1.2	5.4	38	100	0.8	361	1	1	2	1	0	0	0	0	0	0	0	1	0	8	24	25	15	3	0	0	1	1	1
63	2	32.1358	81	96	18	100	37.11	13	3.1	4.19355	17.7	107	10.7	17.7	126	4	4.9	14.3	180	26.7	1.3	3.5	392	1330	1.1	228	0	1	2	1	1	1	0	0	0	1	0	1	0	7	44	18	15	9	0	0	0	0	0
74	2	42.8182	86	93	20	94	36.44	156	4	39	11.7	121	11.3	21	130	7	1.1	54.8	204.822	55.5	5.1	0.8	9	13	4.8	181	0	0	0	1	0	1	1	1	0	0	0	0	0	9	58	30	15	10	1	0	0	0	0
59	2	26.4403	125	97	16	100	37.22	9	2.6	3.46154	22.6	192	9.8	14	145	4.8	2.8	16.5	166	35.9	1.5	1.8	96	191	1	367	0	1	3	1	0	0	0	1	0	1	0	0	0	7	56	38	15	4	0	0	0	0	0
39	2	25.1559	80	112	17	97	36.56	133	3.3	40.303	33	42	8.5	16.8	146	3.3	3.21904	24.4	113	42.6	2.3	36.3	20	31	6.3	482.686	0	1	1	1	0	0	0	0	0	0	0	1	0	15	110	37	6	3	0	0	1	1	1
66	2	31.6081	65	96	18	90	36.33	60	2.4	25	15.8	78	10.6	19.5	132	4.6	1.5	45.3	518	60.6	4.2	3.4	36	48	1.4	482.686	0	1	3	1	0	0	1	0	0	0	1	0	0	9	42	29	12	9	0	0	1	1	1
42	1	27.7778	114	81	31	93	37.11	17	2.2	7.72727	22.4	237	13.5	12.2	134	4.7	3.21904	14.2	204.822	39.2	1.3	1.3	18	29	1.2	217	0	1	2	1	0	0	0	1	1	0	0	0	0	2	34	23	15	3	0	0	1	0	0
76	1	23.9158	85	68	15	99	35.28	19	2.2	8.63636	1.7	37	8.7	19.6	154	3.5	1.8	21.7	191	150	2	1.3	14	31	0.9	119	0	1	3	1	1	1	1	0	0	0	0	1	0	9	42	36	13	6	0	0	1	1	1
62	2	23.2226	88	67	24	86	36.56	14	3	4.66667	14.8	197	7.3	22.2	139	3.5	3.8	15.1	204.822	33.9	1.4	0.6	13	47	2.9	287	0	1	3	1	0	1	1	0	0	0	0	0	0	5	45	25	14	9	0	0	0	1	0
52	1	18.2351	89	84	24	97	35.89	14	3.6	3.88889	8.5	162	10.3	14.6	139	4.4	3.21904	12.5	241	48.3	1.2	0.3	9	21	0.8	147	0	0	0	0	1	0	0	0	0	0	0	1	0	3	24	19	15	6	0	0	0	0	0
70	1	19.2389	83	77	15	95	37.67	9	2.4	3.75	7.3	131	11.3	13.4	137	3.8	3.21904	11.3	204.822	31.7	1	18	53	89	0.3	482.686	0	0	0	0	1	0	0	0	0	0	0	0	0	3	35	22	11	6	0	0	1	0	0
63	1	25.7117	88	89	20	100	36.94	6	3	2	1.3	41	10.9	18.9	137	3.5	4.8	59.5	46	89.5	5.5	16.7	15	231	0.4	284	0	1	3	1	0	0	0	1	1	0	0	0	0	14	60	32	15	9	0	0	1	1	1
77	1	20.5853	78	65	15	99	35.67	32	2.1	15.2381	13.3	51	9.4	15.1	147	4.5	3.1	20	204.822	40	2	1	11	40	1.1	482.686	0	1	2	1	0	1	0	0	0	0	0	1	1	9	59	43	14	14	0	0	1	1	0
60	2	30.1098	80	79	28	100	36.72	21	2.4	8.75	9.1	96	9.5	18	137	4.5	2.6	16.7	168	33.7	1.5	4.9	22	70	1.3	322	1	1	3	1	0	0	0	0	0	0	0	1	0	12	51	40	15	5	0	0	0	1	1
65	2	29.1696	78	64	12	100	36.56	38	2.5	15.2	8.9	186	9.4	16.1	140	4.9	0.8	12.5	204.822	28.5	1.2	5.2	203	381	1.8	204	0	0	0	1	1	1	0	0	0	1	1	1	0	10	60	24	14	6	0	0	0	0	0
55	2	33.3323	74	69	0	100	36.83	18	2.7	6.66667	17.1	124	10.7	15.5	140	4.9	3.6	27.5	108	50.3	2.6	2	2012	2152	0.9	1211	0	1	3	1	0	0	0	0	0	0	0	0	0	9	70	38	10	4	1	0	0	0	0
64	1	23.9158	127	72	20	92	37.44	9	3	3	8.2	142	10	14.4	134	4.4	1.3	11.8	204.822	25.8	1	1	60	46	0.5	154	0	0	0	0	1	0	0	0	0	0	0	0	0	2	46	27	15	5	0	0	0	0	0
63	2	34.6382	99	106	13	98	36.89	12	3	4	20	116	10.6	15.1	138	4.2	2.4	15.6	168	31.4	1.4	2.4	398	1040	0.8	482.686	0	1	2	1	1	0	0	0	0	1	0	0	0	7	46	41	14	8	0	1	0	0	0
76	2	22.8571	78	74	16	90	36.17	33	3.5	9.42857	7.9	104	9.9	20.2	131	4.2	2.7	14.9	143	45.1	1.4	2.3	18	34	2.2	379	0	1	3	1	1	1	1	0	0	1	0	1	1	15	55	41	13	8	0	0	1	1	1
68	2	30.9715	81	101	22	98	37	18	3.2	5.625	17.2	123	12.3	13.3	139	4.4	2.2	18.1	201	30.9	1.7	2.5	467	960	0.8	482.686	0	1	2	1	1	0	0	1	0	0	0	0	0	10	32	30	15	5	0	1	0	0	0
66	2	38.655	60	64	13	97	37.28	35	2.5	14	15	99	7.4	23.4	138	4	1.8	15.2	204.822	33.2	1.4	1.1	12	27	0.9	193	0	1	2	1	0	0	1	0	0	0	1	0	0	8	35	26	15	5	0	0	1	1	1
50	2	60.5867	142	99	34	95	38.17	12	2.4	5	4.9	147	12.5	17.3	136	3.3	4.2	29.6	484	27.7	2.7	14.3	242	390	1	377	0	1	3	0	0	1	0	0	0	0	0	1	0	14	90	41	11	12	0	0	0	1	0
57	2	25.6801	87	57	15	100	37.56	15	2.9	5.17241	3.9	73	8.3	15.4	140	4.5	3.2	19.6	128	63.4	1.8	3.1	1713	2418	0.6	482.686	1	1	1	1	0	0	0	0	0	0	0	0	0	6	41	27	15	6	0	1	0	1	1
48	1	17.0068	71	106	7	100	37	13	4	3.25	1.5	78	11.2	14	146	3.1	5	14.9	258	33.3	1.3	1.8	296	644	1.2	431	0	1	1	0	0	0	0	0	0	0	0	0	0	8	30	29	15	3	0	1	0	0	0
79	2	28.9116	118	63	22	95	38.61	56	2.4	23.3333	15.9	360	8.5	25.9	133	5.4	2	15.6	204.822	73.7	1.4	1.6	279	678	2.1	595	0	1	2	1	0	1	1	0	0	0	0	0	0	7	50	21	15	10	0	0	1	0	0
49	2	28.0391	121	105	15	99	37.33	33	3.4	9.70588	11.4	50	10.7	21.5	136	5.3	3.7	20	191	35.3	1.8	9	627	842	1.1	278	1	1	2	1	0	0	0	1	0	1	0	1	0	8	52	29	15	3	1	1	1	1	1
72	2	27.5475	60	41	18	94	36.72	22	2.6	8.46154	15.6	107	11.9	15.2	136	5.3	1.8	18.1	204.822	39.5	1.6	3.5	47	92	1.2	482.686	0	1	2	0	0	0	0	0	0	0	0	1	0	6	49	27	14	8	0	0	1	1	0
66	2	54.5635	86	112	28	95	36.83	21	3.8	5.52632	11.9	264	13.5	15.3	139	4.7	2	11.4	204.822	20.4	1.1	0.3	24	17	1.1	186	0	1	1	0	0	1	1	1	1	1	1	0	0	3	34	35	15	9	0	0	0	0	0
62	2	28.9824	48	117	33	95	37.78	10	2.4	4.16667	12.6	128	15.9	12	135	3.1	3.21904	13.6	204.822	23.7	1.3	0.8	8	18	0.7	219	0	0	0	1	1	0	0	1	0	0	0	0	0	4	22	26	14	3	0	0	0	0	0
69	1	30.1247	109	88	20	100	37	12	2.9	4.13793	6.7	43	7.3	16.1	134	3.3	1.8	16.3	303	31.3	1.5	5.2	595	1275	0.5	247	0	1	2	1	1	0	0	1	0	1	0	0	0	8	49	32	15	5	0	0	0	0	0
53	2	37.9229	101	73	13	99	37.5	39	3.2	12.1875	18.9	139	10	14.4	137	6.1	3.1	17.4	228	37.1	1.6	3	1492	2295	1.7	482.686	0	1	2	1	0	1	0	0	0	1	0	0	0	11	63	31	15	8	0	1	0	0	0
58	1	15.7313	105	86	25	100	38.33	20	3.2	6.25	11.8	57	9.8	13.3	133	4.4	4.6	15.1	423	31	1.4	0.7	9	23	0.9	193	1	1	1	1	1	1	0	0	0	1	1	1	0	7	50	31	14	4	0	0	1	1	1
[truncated: 1,270 more rows]
[truncated: 7 more columns]
